# Supplementary material for: Proteomics analysis of MSN, MWCNT and ZnO nanoparticle-induced alteration in prepubertal rat ovary
Source: Royal Society of Chemistry journal article supplement (doi:10.1039/d2en00492e), 2022-01-01
Supplement: d2en00492e3.pdf [file d2en00492e3.pdf]

**Table 1: Body and organ weight values of female rat exposed 14 days**

| <b>Parameters measured</b> | <b>Control</b> | <b>MSN<br/>15mg/kg BW</b>  | <b>ZnO NPs<br/>5mg/kg BW</b> | <b>MWCNT 5mg/kg<br/>BW</b>  |
|----------------------------|----------------|----------------------------|------------------------------|-----------------------------|
| Body weight (g)            | 78.26±2.120    | 72.40±2.462 <sup>ns</sup>  | 61.84±1.387 <sup>**</sup>    | 58.66±3.763 <sup>***</sup>  |
| Liver weight (g)           | 3.252±0.1124   | 3.047±0.1412 <sup>ns</sup> | 2.525±0.1258 <sup>**</sup>   | 2.527±0.1142 <sup>**</sup>  |
| Kidney weight (g)          | 0.820±0.0354   | 0.765±0.0294 <sup>ns</sup> | 0.645±0.0176 <sup>**</sup>   | 0.630±0.0291 <sup>***</sup> |
| Spleen weight (g)          | 0.266±0.0190   | 0.226±0.0140 <sup>ns</sup> | 0.143±0.0161 <sup>***</sup>  | 0.160±0.0134 <sup>***</sup> |

Data from six animals; Figures quoted as mean±SD and significant (\*p<.05, \*\*p<0.01, \*\*\*p<0.001) compared to control
