# Supplementary material for: Proteomics analysis of MSN, MWCNT and ZnO nanoparticle-induced alteration in prepubertal rat ovary
Source: Royal Society of Chemistry journal article supplement (doi:10.1039/d2en00492e), 2022-01-01
Supplement: d2en00492e4.pdf [file d2en00492e4.pdf]

**Table 2: Zn and Si values of female rat exposed 14 days**

| <b>Parameters measured</b> | <b>Zn Control<br/>Conc. of Zn<br/>[µg/g]</b> | <b>ZnO NPs<br/>5mg/kg BW<br/>Conc. of Zn [µg/g]</b> | <b>Si Control<br/>Conc. of Si [µg/g]</b> | <b>MSN<br/>15mg/kg BW<br/>Conc. of Si [µg/g]</b> |
|----------------------------|----------------------------------------------|-----------------------------------------------------|------------------------------------------|--------------------------------------------------|
| Liver                      | 8.940±0.7349                                 | 21.51±0.5935***                                     | 7.898±0.4112                             | 13.63±0.5776 <sup>ns</sup>                       |
| Kidney                     | 7.311±0.6010                                 | 17.11±1.918**                                       | 7.177±0.2055                             | 17.44±0.7353*                                    |
| Spleen                     | 7.387±0.8705                                 | 14.73±1.959*                                        | 10.87±0.06774                            | 19.98±0.2872*                                    |
| Ovary                      | 15.65±0.5956                                 | 17.85±1.771 <sup>ns</sup>                           | 30.92±1.235                              | 43.67±4.769**                                    |

Data from three animals with triplicate experiment; Figures quoted as mean±SD and significant (ns= non significant, \*p<.05, \*\*p<0.01, \*\*\*p<0.001) compared to control
