# Supplementary material for: Proteomics analysis of MSN, MWCNT and ZnO nanoparticle-induced alteration in prepubertal rat ovary
Source: Royal Society of Chemistry journal article supplement (doi:10.1039/d2en00492e), 2022-01-01
Supplement: d2en00492e5.xlsx [file d2en00492e5.xlsx]

## Sheet: Full data tissue
Entry no.	Uniprot ID	Protein Probability	Protein Name	Protein description	115/114 fold change(MSN)	116/114 fold change (ZnO)	117/114 fold change(MWCNT)	Peptides	Protein Length	Function	Catalytic Activity	Biological Process	Cellular Component	Molecular Function
1	P62736	1	ACTA2	Actin, aortic smooth muscle OS=Homo sapiens GN=ACTA2 PE=1 SV=1;Actin, alpha cardiac muscle 1 OS=Homo sapiens GN=ACTC1 PE=1 SV=1;Actin, alpha skeletal muscle OS=Homo sapiens GN=ACTA1 PE=1 SV=1;cDNA FLJ78096, highly similar to Homo sapiens actin, alpha, cardiac muscle (ACTC), mRNA OS=Homo sapiens PE=2 SV=1;cDNA FLJ53662, highly similar to Actin, alpha skeletal muscle OS=Homo sapiens PE=2 SV=1;Actin…	4.22222	2.77778	1.77778	AGDDAPR+AGFAGDDAPR+AVFPSIVGR+AVFPSIVGRPR+DLTDYLMK+DSYVGDEAQSK+EITALAPSTMK+GYSFVTTAER+HQGVMVGMGQK+IIAPPER+LCYVALDFENEMATAASSSSLEK+PSIVGRPR+QEYDEAGPSIVHR+SYELPDGQVITIGNER+TALAPSTMK+YPIEHGIITNWDDMEK	377	Actins are highly conserved proteins that are involved in various types of cell motility and are ubiquitously expressed in all eukaryotic cells.		GO:0072144 cellular processGO:0090131 developmental processGO:0006936 interaction with cells and organismsGO:0010628 regulationGO:0045893 regulationGO:0008217 regulationGO:0009615 response to stimulusGO:0014829 regulation	GO:0015629 (cytoskeleton, intracellular) GO:0044297 (other, cell body) GO:0005737 (cytoplasm, intracellular) GO:0005829 (cytoplasm, intracellular) GO:0070062 (extracellular, extracellular exosome) GO:0005615 (extracellular, extracellular region part) GO:0030175 (other, cell projection) GO:0030027 (other, cell leading edge) GO:0032991 (macromolecular complex) GO:0030485 (other intracellular organe…	GO:0005524 (binding, carbohydrate derivative binding) GO:0019901 (binding, protein binding)
2	P99024	1	Tubb5	Tubulin beta-5 chain OS=Mus musculus GN=Tubb5 PE=1 SV=1	2.84615	1.07692	2.30769	AILVDLEPGTMDSVR+ALTVPELTQQVFDAK+EAESCDCLQGFQLTHSLGGGTGSGMGTLLISK+EIVHLQAGQCGNQIGAK+EVDEQMLNVQNK+FPGQLNADLR+GHYTEGAELVDSVLDVVR+IGNSTAIQELFK+IMNTFSVVPSPK+ISEQFTAMFR+ISVYYNEATGGK+LAVNMVPFPR+LTTPTYGDLNHLVSATMSGVTTCLR+LVDSVLDVVR+MAVTFIGNSTAIQELFK+NSSYFVEWIPNNVK+SGPFGQIFRPDNF+TAVCDIPPR+VNMVPFPR+VSDTVVEPYNATLSVH+YLTVAAVFR	444	Tubulin is the major constituent of microtubules. It binds two moles of GTP, one at an exchangeable site on the beta chain and one at a non-exchangeable site on the alpha chain.		GO:0009987 cellular processGO:0007017 cellular processGO:0051225 cellular component organization or biogenesis	GO:0044297 (other, cell body) GO:0005737 (cytoplasm, intracellular) GO:0036464 (nucleus, intracellular) GO:0005829 (cytoplasm, intracellular) GO:0045121 (other, membrane part) GO:0005874 (cytoskeleton, intracellular) GO:0005641 (nucleus, endomembrane system) GO:0005634 (nucleus, intracellular) GO:0032991 (macromolecular complex) GO:0045298 (cytoskeleton, intracellular)	GO:0005525 (binding, carbohydrate derivative binding) GO:0032794 (binding, protein binding) GO:0003924 (catalytic activity, hydrolase activity) GO:0042288 (binding, protein binding) GO:0019904 (binding, protein binding) GO:0044877 (binding, macromolecular complex binding) GO:0005200 (structural molecule activity, structural constituent of cytoskeleton) GO:0031625 (binding, protein binding)
3	Q562R1	0.9998	ACTBL2	Beta-actin-like protein 2 OS=Homo sapiens GN=ACTBL2 PE=1 SV=2	0.2	1.92	0.84	DLTDYLMK+HQGVMVGMGQK+IIAPPER+SYELPDGQVITIGNER+TTGIVMDSGDGVTH+VAPDEHPILLTEAPLNPK	376	Actins are highly conserved proteins that are involved in various types of cell motility and are ubiquitously expressed in all eukaryotic cells.			GO:0005737 (cytoplasm, intracellular) GO:0005856 (cytoskeleton, intracellular) GO:0070062 (extracellular, extracellular exosome) GO:0005615 (extracellular, extracellular region part) GO:0098978 (other, glutamatergic synapse)	GO:0005524 (binding, carbohydrate derivative binding)
4	B9EKP5	1	Flna	Filamin, alpha OS=Mus musculus GN=Flna PE=2 SV=1	1.52632	0.789474	1.47368	AEAGVPAEFGIWTR+AEISCTDNQDGTCSVSYLPVLPGDYSILVK+AFGPGLQGGNAGSPAR+AHVAPCFDASK+ALTQTGGPHVK+ANLPQSFQVDTSK+ASGPGLNTTGVPASLPVEFTIDAK+AWGPGLEGGIVGK+AYGPGIEPTGNMVK+CAPGVVGPTEADIDFDIIR+CSYQPTMEGVHTVHVTFAGVPIPR+DAGEGGLSLAIEGPSK+DAGEGLLAVQITDPEGKPK+DAGYGGLSLSIEGPSK+DGSCGVAYVVQEPGDYEVSVK+DGSCSVEYIPYEAGTYSLNVTYGGHQVPGSPFK+EAGAGGLAIAVEGPSK+EAMQQADDWLGIPQVITPEEIVDPNVDEHSVMTYLSQFPK+EAPQDFHPDR+EATTEFSVDAR+EGSYSISV…	2639					GO:0051015 (binding, macromolecular complex binding)
5	P07437	1	TUBB	Tubulin beta chain OS=Homo sapiens GN=TUBB PE=1 SV=2;Beta 5-tubulin OS=Homo sapiens GN=TUBB PE=2 SV=1	2.84615	1.07692	2.30769	AILVDLEPGTMDSVR+ALTVPELTQQVFDAK+EAESCDCLQGFQLTH+EAESCDCLQGFQLTHSLGGGTGSGMGTLLISK+EIVHIQAGQCGNQIGAK+EVDEQMLNVQNK+FPGQLNADLR+GHYTEGAELVDSVLDVVR+IGNSTAIQELFK+IMNTFSVVPSPK+IREEYPDRIMNTFSVVPSPK+ISEQFTAMFR+ISVYYNEATGGK+LAVNMVPFPR+LTTPTYGDLNHLVSATMSGVTTCLR+MAVTFIGNSTAIQELFK+NSSYFVEWIPNNVK+SGPFGQIFRPDNF+SLGGGTGSGMGTLLLSK+VSDTVVEPYNATLSVH+YLTVAAVFR	444	Tubulin is the major constituent of microtubules. It binds two moles of GTP, one at an exchangeable site on the beta chain and one at a non-exchangeable site on the alpha chain.		GO:0051301 cellular processGO:0009987 cellular processGO:0097711 cellular component organization or biogenesisGO:0030705 localizationGO:0000086 cellular processGO:0007017 cellular processGO:0042267 otherGO:0043312 cellular processGO:0010389 regulationGO:0050807 regulationGO:0051225 cellular component organization or biogenesis	GO:0035578 (other intracellular organelles, endomembrane system) GO:0044297 (other, cell body) GO:0005737 (cytoplasm, intracellular) GO:0036464 (nucleus, intracellular) GO:0005856 (cytoskeleton, intracellular) GO:0070062 (extracellular, extracellular exosome) GO:0005576 (extracellular) GO:0045121 (other, membrane part) GO:0005874 (cytoskeleton, intracellular) GO:0005641 (nucleus, endomembrane sys…	GO:0005525 (binding, carbohydrate derivative binding) GO:0032794 (binding, protein binding) GO:0003924 (catalytic activity, hydrolase activity) GO:0042288 (binding, protein binding) GO:0019904 (binding, protein binding) GO:0044877 (binding, macromolecular complex binding) GO:0005200 (structural molecule activity, structural constituent of cytoskeleton) GO:0005198 (structural molecule activity) GO…
6	P48975	1	ACTB	Actin, cytoplasmic 1 OS=Cricetulus griseus GN=ACTB PE=3 SV=1;Actin, cytoplasmic 1 OS=Mesocricetus auratus GN=ACTB PE=1 SV=1;actin, cytoplasmic 1 OS=Mesocricetus auratus GN=Actb PE=3 SV=1;Actin, cytoplasmic 1 OS=Cricetulus griseus GN=I79_001666 PE=3 SV=1	0.956522	1.91304	0.391304	AGFAGDDAPR+ANTVLSGGTTMYPGIADR+AVFPSIVGR+DLTDYLMK+DLYANTVLSGGTTMYPGIADR+DSYVGDEAQSK+EHPVLL+EITALAPSTMK+GDGVTHTVPIYEGYALPHAILR+GIVTNWDDMEK+GYSFTTTAER+KMTQIMFETFNTPAMYVAIQAVLSLYASGR+LCYVALDFEQEMATAASSSSLEK+PVLLTEAPLNPK+QEYDESGPSIVHR+SYELPDGQVITIGNER+TTGIVMDSGDGVTHTVPIYEGY+TTGIVMDSGDGVTHTVPIYEGYALPH+TVLSGGTTMYPGIADR+VALDFEQEMATAASSSSLEK+VAPEEHPVLLTEAPLNPK+VGMGQKDSYVGDEAQSK+YSVWIGGS	375	Actin is a highly conserved protein that polymerizes to produce filaments that form cross-linked networks in the cytoplasm of cells. Actin exists in both monomeric (G-actin) and polymeric (F-actin) forms, both forms playing key functions, such as cell motility and contraction. In addition to their role in the cytoplasmic cytoskeleton, G- and F-actin also localize in the nucleus, and regulate gene…			GO:0015629 (cytoskeleton, intracellular) GO:0005856 (cytoskeleton, intracellular) GO:0097433 (cytoplasm, intracellular) GO:0005925 (other, anchoring junction) GO:0005634 (nucleus, intracellular) GO:0005886 (plasma membrane, cell periphery) GO:0032991 (macromolecular complex)	GO:0005524 (binding, carbohydrate derivative binding)
7	P21333-2	1	FLNA	Isoform 2 of Filamin-A OS=Homo sapiens GN=FLNA;Filamin-A OS=Homo sapiens GN=FLNA PE=1 SV=4;Filamin-A OS=Homo sapiens GN=FLNA PE=1 SV=1;Filamin A OS=Homo sapiens GN=FLNA PE=1 SV=1;Filamin A OS=Homo sapiens GN=FLNA PE=2 SV=1	1.28571	0.857143	1.19048	AEAGVPAEFSIWTR+AEISCTDNQDGTCSVSYLPVLPGDYSILVK+ANLPQSFQVDTSK+APSVANVGSHCDLSLK+ASGPGLNTTGVPASLPVEFTIDAK+AYGPGIEPTGNMVK+CSYQPTMEGVHTVHVTFAGVPIPR+DAGEGGLSLAIEGPSK+DAGEGLLAVQITDPEGKPK+DAGYGGLSLSIEGPSK+DGSCGVAYVVQEPGDYEVSVK+DGSCSVEYIPYEAGTYSLNVTYGGHQVPGSPFK+DLAEDAPWK+EAGAGGLAIAVEGPSK+EAMQQADDWLGIPQVITPEEIVDPNVDEHSVMTYLSQFPK+EATTEFSVDAR+FNEEHIPDSPFVVPVASPSGDAR+GAGTGGLGLAVEGPSEAK+GLVEPVDVVDNADGTQTVNYVPSR…		Promotes orthogonal branching of actin filaments and links actin filaments to membrane glycoproteins. Anchors various transmembrane proteins to the actin cytoskeleton and serves as a scaffold for a wide range of cytoplasmic signaling proteins. Interaction with FLNA may allow neuroblast migration from the ventricular zone into the cortical plate. Tethers cell surface-localized furin, modulates its…		GO:0051764 cellular component organization or biogenesisGO:0031532 cellular component organization or biogenesisGO:0007195 regulationGO:0034329 cellular component organization or biogenesisGO:0021987 developmental processGO:0060271 cellular component organization or biogenesisGO:0051220 regulationGO:0045184 localizationGO:0097368 cellular processGO:0021943 cellular component organization or bioge…	GO:0015629 (cytoskeleton, intracellular) GO:0005884 (cytoskeleton, intracellular) GO:0097440 (other, cell projection) GO:0005911 (other, cell-cell junction) GO:0030863 (cytoskeleton, cell periphery) GO:0005737 (cytoplasm, intracellular) GO:0005829 (cytoplasm, intracellular) GO:0043198 (other, cell projection) GO:0070062 (extracellular, extracellular exosome) GO:0005576 (extracellular) GO:0005925 …	GO:0051015 (binding, macromolecular complex binding) GO:0045296 (binding, protein binding) GO:0034988 (binding, macromolecular complex binding) GO:0001664 (binding, protein binding) GO:0051020 (binding, protein binding) GO:0044325 (binding, protein binding) GO:0019900 (binding, protein binding) GO:0031852 (binding, protein binding) GO:0015459 (molecular function regulator, channel regulator activ…
8	P68134	1	Acta1	Actin, alpha skeletal muscle OS=Mus musculus GN=Acta1 PE=1 SV=1;Actin, alpha skeletal muscle OS=Rattus norvegicus GN=Acta1 PE=1 SV=1	0.866667	2.4	1.8	AGFAGDDAPR+AVFPSIVGR+CPETLFQPSFIGMESAGIHETTY+DLTDYLMK+DLYANNVMSGGTTMYPGIADR+DSYVGDEAQSK+EITALAPSTMK+FENEMATAASSSSLEK+GYSFVTTAER+LCYVALDFENEMATAASSSSLEK+MSGGTTMYPGIADR+PTLLTEAPLNPK+QEYDEAGPSIVHR+SYELPDGQVITIGNER+TTGIVLDSGDGVTHNVPIYEGYALPH+VALDFENEMATAASSSSLEK+VAPEEHPTLLTEAPLNPK+VMSGGTTMYPGIADR+YPIEHGIITNWDDMEK	377	Actins are highly conserved proteins that are involved in various types of cell motility and are ubiquitously expressed in all eukaryotic cells.		GO:0071417 cellular processGO:0090131 developmental processGO:0010628 regulationGO:0009991 response to stimulusGO:0010226 response to stimulusGO:0009612 response to stimulusGO:0048545 response to stimulusGO:0043503 cellular processGO:0048741 cellular processGO:0030240 cellular component organization or biogenesis	GO:0015629 (cytoskeleton, intracellular) GO:0005884 (cytoskeleton, intracellular) GO:0044297 (other, cell body) GO:0005737 (cytoplasm, intracellular) GO:0030175 (other, cell projection) GO:0030027 (other, cell leading edge) GO:0032991 (macromolecular complex) GO:0030017 (other intracellular organelles, intracellular) GO:0001725 (cytoskeleton, intracellular) GO:0005865 (cytoskeleton, intracellular)	GO:0005524 (binding, carbohydrate derivative binding)
9	V9HVZ7	1	HEL-176	Epididymis luminal protein 176 OS=Homo sapiens GN=HEL-176 PE=2 SV=1	3.6	3.1	2.1	ANTVLSGGTTMYPGIADR+DLTDYLMK+DLYANTVLSGGTTMYPGIADR+GDGVTHTVPIYEGYALPHAILR+GYSFTTTAER+KITALAPSTMK+LCYVALDFEQEMATAASSSSLEK+QEYDESGPSIVHR+SYELPDGQVITIGNER+TVLSGGTTMYPGIADR+VALDFEQEMATAASSSSLEK	223
10	G3HPV6	1	I79_012827	Histone H4 OS=Cricetulus griseus GN=I79_012827 PE=3 SV=1	2.91667	1.91667	1.66667	AGLQFPVGR+DNIQGITKPAIR+GLQFPVGR+ISGLIYEETR+KTVTAMDVVYALK+QGITKPAIR+TLYGFGG+TVTAMDVVYALK+TVTAMDVVYALKR+VFLENVIR+VGAGAPVY+VGAGAPVYLA+VTIAQGGVLPNIQAVLLPK	262	Core component of nucleosome. Nucleosomes wrap and compact DNA into chromatin, limiting DNA accessibility to the cellular machineries which require DNA as a template. Histones thereby play a central role in transcription regulation, DNA repair, DNA replication and chromosomal stability. DNA accessibility is regulated via a complex set of post-translational modifications of histones, also called h…		GO:0006352 cellular processGO:0006334 cellular component organization or biogenesis	GO:0000786 (chromosome, intracellular) GO:0005634 (nucleus, intracellular)	GO:0003677 (binding, heterocyclic compound binding) GO:0046982 (binding, protein binding)
11	E2QSF4	1	TUBB	Uncharacterized protein OS=Canis familiaris GN=TUBB PE=3 SV=1	3.875	1.625	5.875	AILVDLEPGTMDSVR+ALTVPELTQQVFDAK+EAESCDCLQGFQLTH+EAESCDCLQGFQLTHSLGGGTGSGMGTLLISK+EIVHIQAGQCGNQIGAK+EVDEQMLNVQNK+EYPDRIMNTFSVVPSPK+FPGQLNADLR+GHYTEGAELVDSVLDVVR+IGNSTAIQELFK+IMNTFSVVPSPK+ISEQFTAMFR+ISVYYNEATGGK+KMAVTFIGNSTAIQELFKR+LAVNMVPFPR+LTTPTYGDLNHLVSATMSGVTTCLR+MAVTFIGNSTAIQELFK+NSSYFVEWIPNNVK+SLGGGTGSGMGTLLISK+VSDTVVEPYNATLSVH	444	Tubulin is the major constituent of microtubules. It binds two moles of GTP, one at an exchangeable site on the beta chain and one at a non-exchangeable site on the alpha chain.		GO:0050807 regulationGO:0051225 cellular component organization or biogenesis	GO:0044297 (other, cell body) GO:0036464 (nucleus, intracellular) GO:0005874 (cytoskeleton, intracellular) GO:0005641 (nucleus, endomembrane system)	GO:0005525 (binding, carbohydrate derivative binding) GO:0003924 (catalytic activity, hydrolase activity) GO:0042288 (binding, protein binding) GO:0005200 (structural molecule activity, structural constituent of cytoskeleton) GO:0031625 (binding, protein binding)
12	P19378	1	HSPA8	Heat shock cognate 71 kDa protein OS=Cricetulus griseus GN=HSPA8 PE=2 SV=1;Heat shock cognate 71 kDa protein OS=Mus musculus GN=Hspa8 PE=1 SV=1;Heat shock cognate 71 kDa protein OS=Rattus norvegicus GN=Hspa8 PE=1 SV=1;Heat shock cognate protein OS=Cricetulus griseus GN=H671_4g13251 PE=3 SV=1;Heat shock cognate 71 kDa protein OS=Rattus norvegicus GN=Hspa8 PE=3 SV=3;Putative uncharacterized protein…	3.5	1.3	2.3	CNEIISWLDK+DAGTIAGLNVLR+DNNLLGK+EIAEAYLGK+FEELNADLFR+FELTGIPPAPR+GPAVGIDLGTTYSCVGVFQHGK+GTLDPVEK+IINEPTAAAIAYGLDK+IINEPTAAAIAYGLDKK+LIGDAAK+LLQDFFNGK+NQVAMNPTNTVFDAK+NSLESYAFNMK+PEEVSSMVLTK+QTQTFTTYSDNQPGVLIQVYEGER+SFYPEEVSSMVLTK+SINPDEAVAYGAAVQAAILSGDK+SQIHDIVLVGGSTR+STAGDTHLGGEDFDNR+TTPSYVAFTDTER+TVTNAVVTVPAYFNDSQR+VCNPIITK+VEIIANDQGNR	646	Molecular chaperone implicated in a wide variety of cellular processes, including protection of the proteome from stress, folding and transport of newly synthesized polypeptides, activation of proteolysis of misfolded proteins and the formation and dissociation of protein complexes. Plays a pivotal role in the protein quality control system, ensuring the correct folding of proteins, the re-foldin…		GO:0006397 cellular processGO:0045892 regulationGO:0008380 cellular processGO:0006351 cellular process	GO:0042470 (other intracellular organelles, intracellular) GO:0005730 (nucleus, intracellular) GO:0005634 (nucleus, intracellular) GO:0005886 (plasma membrane, cell periphery) GO:0000974 (macromolecular complex, protein complex) GO:1990904 (nucleus, ribonucleoprotein complex) GO:0005681 (nucleus, intracellular)	GO:0005524 (binding, carbohydrate derivative binding)
13	P15999	1	Atp5a1	ATP synthase subunit alpha, mitochondrial OS=Rattus norvegicus GN=Atp5a1 PE=1 SV=2;ATP synthase subunit alpha OS=Rattus norvegicus GN=Atp5a1 PE=1 SV=1	1.4375	1.5	1.25	AVDSLVPIGR+ELIIGDR+EVAAFAQFGSDLDAATQQLLSR+FLSHVVSQHQSLLGNIR+GMSLNLEPDNVGVVVFGNDK+GMSLNLEPDNVGVVVFGNDKLIK+ILGADTSVDLEETGR+ITKFESAFLSHVVSQHQSLLGNIR+LELAQYR+LTDADAMK+NVQAEEMVEFSSGLK+QGQYSPMAIEEQVAVIYAGVR+QMSLLLR+QVAGTMK+RTGAIVDVPVGDELLGR+STVAQLVK+TGAIVDVPVGDELLGR+TGTAEMSSILEER+TSIAIDTIINQK+TSIAIDTIINQKR+VLSIGDGIAR+VVDALGNAIDGK+VVDALGNAIDGKGPVGSK+VVSQHQSLLGNIR	553	Mitochondrial membrane ATP synthase (F(1)F(0) ATP synthase or Complex V) produces ATP from ADP in the presence of a proton gradient across the membrane which is generated by electron transport complexes of the respiratory chain. F-type ATPases consist of two structural domains, F(1) - containing the extramembraneous catalytic core, and F(0) - containing the membrane proton channel, linked togethe…		GO:0046034 cellular processGO:0015986 cellular process	GO:0045121 (other, membrane part) GO:0005743 (mitochondria, envelope) GO:0005753 (mitochondria, envelope) GO:0000275 (mitochondria, envelope) GO:0005739 (mitochondria, intracellular) GO:0005886 (plasma membrane, cell periphery) GO:0045261 (macromolecular complex, intracellular)	GO:0043531 (binding, carbohydrate derivative binding) GO:0005524 (binding, carbohydrate derivative binding) GO:0016887 (catalytic activity, hydrolase activity) GO:0046933 (catalytic activity, hydrolase activity)
14	P56480	1	Atp5b	ATP synthase subunit beta, mitochondrial OS=Mus musculus GN=Atp5b PE=1 SV=2	2.125	1.125	1.125	ADKLAEEHGS+AHGGYSVFAGVGER+AIAELGIYPAVDPLDSTSR+DQEGQDVLLFIDNIFR+EGNDLYHEMIESGVINLK+FLSQPFQVAEVFTGHMGK+FTQAGSEVSALLGR+GFQQILAGEYDHLPEQAFYMVGPIEEAVAK+GSITSVQAIYVPADDLTDPAPATTFAHLDATTVLSR+IGLFGGAGVGK+IMNVIGEPIDER+IPSAVGYQPTLATDMGTMQER+IPVGPETLGR+KGSITSVQAIYVPADDLTDPAPATTF+SLQDIIAILGMDELSEEDK+TIAMDGTEGLVR+VALTGLTVAEYFR+VALVYGQMNEPPGAR+VLDSGAPIK+VLDSGAPIKIPVGPETLGR+VVDLLAPYAK		Mitochondrial membrane ATP synthase (F(1)F(0) ATP synthase or Complex V) produces ATP from ADP in the presence of a proton gradient across the membrane which is generated by electron transport complexes of the respiratory chain. F-type ATPases consist of two structural domains, F(1) - containing the extramembraneous catalytic core, and F(0) - containing the membrane proton channel, linked togethe…	ATP + H(2)O + H(+)(In) = ADP + phosphate + H(+)(Out).	GO:0001525 developmental processGO:0006754 cellular processGO:0046034 cellular processGO:0015986 cellular processGO:0006629 metabolic processGO:0006933 interaction with cells and organismsGO:0043536 regulationGO:1902600 localizationGO:0006898 localizationGO:0051453 regulation	GO:0009986 (cell surface, cell surface) GO:0016020 (other) GO:0045121 (other, membrane part) GO:0005743 (mitochondria, envelope) GO:0031966 (mitochondria, envelope) GO:0042645 (mitochondria, intracellular) GO:0005753 (mitochondria, envelope) GO:0000275 (mitochondria, envelope) GO:0005739 (mitochondria, intracellular) GO:0043209 (other, myelin sheath) GO:0005886 (plasma membrane, cell periphery) G…	GO:0043532 (binding, protein binding) GO:0005524 (binding, carbohydrate derivative binding) GO:0016887 (catalytic activity, hydrolase activity) GO:0005509 (binding, ion binding) GO:0030228 (molecular transducer activity, receptor activity) GO:0042288 (binding, protein binding) GO:0046933 (catalytic activity, hydrolase activity) GO:0046961 (catalytic activity, hydrolase activity)
15	G3H2T7	1	I79_004539	Histone H3 OS=Cricetulus griseus GN=I79_004539 PE=3 SV=1	0.818182	5.54545	0.818182	AGLQFPVGR+EIAQDFK+GLQFPVGR+STELLIR+VGAGAPVY+VGAGAPVYM+VGAGAPVYMA+VTIAQGGVLPNIQAVLLPK+YRPGTVALR	267				GO:0000786 (chromosome, intracellular) GO:0005634 (nucleus, intracellular)	GO:0003677 (binding, heterocyclic compound binding) GO:0046982 (binding, protein binding)
16	P05213	1	Tuba1b	Tubulin alpha-1B chain OS=Mus musculus GN=Tuba1b PE=1 SV=2;Tubulin alpha-1B chain OS=Cricetulus griseus GN=TUBA1B PE=2 SV=1;Tubulin alpha-1B chain OS=Rattus norvegicus GN=Tuba1b PE=1 SV=1;Tubulin alpha chain (Fragment) OS=Cricetulus griseus GN=Calpha1 PE=3 SV=1	2.6875	1.875	0.6875	AVCMLSNTTAIAEAWAR+AVFVDLEPTVIDEVR+AYHEQLSVAEITNACFEPANQMVK+DVNAAIATIK+EIIDLVLDR+FDGALNVDLTEFQTNLVPYPR+FDLMYAK+GHYTIGK+IHFPLATYAPVISAEK+LISQIVSSITASLR+LSVDYGK+LSVDYGKK+NLDIERPTYTNLNR+QLFHPEQLITGK+SIQFVDWCPTGFK+TIGGGDDSFNTF+TIGGGDDSFNTFFSETGAGK+VGINYQPPTVVPGGDLAK+YMACCLLYR
17	P02770	1	Alb	Serum albumin OS=Rattus norvegicus GN=Alb PE=1 SV=2	1.66667	0.761905	1.09524	AADKDNCFATEGPNLVAR+APQVSTPTLVEAAR+CCAEGDPPACYGTVLAEFQPLVEEPK+DDNPNLPPFQRPEAEAMCTSFQENPTSFLGHYLHEVAR+DNYGELADCCAK+DVFLGTFLYEYSR+EAHKSEIAHR+ECCHGDLLECADDR+FKDLGEQHFK+FPNAEFAEITK+FYAPELLYYAEK+GLVLIAFSQY+LGEYGFQNAVLVR+LPCVEDYLSAILNR+LQACCDKPVLQK+LRDNYGELADCCAK+LVQEVTDFAK+NECFLQHKDDNPNLPPFQRPEAEAMCTSFQENPTSFLGHYLHEVAR+QEPERNECFLQHKDDNPNLPPFQRPEAEAMCTSFQENPTSFLGHYLHEVAR+QEVTDFAK+QTALAELVK+RHPYFYAPELLYY…	608	Serum albumin, the main protein of plasma, has a good binding capacity for water, Ca(2+), Na(+), K(+), fatty acids, hormones, bilirubin and drugs. Its main function is the regulation of the colloidal osmotic pressure of blood. Major zinc transporter in plasma, typically binds about 80% of all plasma zinc.		GO:0009267 cellular processGO:0019836 regulationGO:0051659 regulationGO:0043066 regulationGO:0046010 behaviorGO:0046689 response to stimulusGO:0007584 response to stimulusGO:0010033 response to stimulusGO:0070541 response to stimulusGO:0042311 regulation	GO:0005604 (extracellular, extracellular matrix) GO:0005615 (extracellular, extracellular region part) GO:0032991 (macromolecular complex)	GO:0003677 (binding, heterocyclic compound binding) GO:0008144 (binding, drug binding) GO:0019899 (binding, protein binding) GO:0005504 (binding, ion binding) GO:0030170 (binding, cofactor binding) GO:0015643 (binding, toxic substance binding) GO:0008270 (binding, ion binding)
18	E9QPE7	1	Myh11	Myosin-11 OS=Mus musculus GN=Myh11 PE=1 SV=1;MKIAA0866 protein OS=Mus musculus GN=Myh11 PE=2 SV=1	0.35	0.45	0.7	ALEEALEAK+ALELDPNLYR+DVASLGSQLQDTQELLQEETR+EDQSILCTGESGAGK+EELAEELASSLSGR+EQADFAIEALAK+FDQLLAEEK+FVADLWK+HTQAVEELTEQLEQFK+IVFQEFR+IVGLDQMAK+LEGDASDFHEQIADLQAQIAELK+LEVNMQALK+LQNEVESVTGMLNEAEGK+LQQELDDLVVDLDNQR+LRNWQWWR+NMDPLNDNVTSLLNASSDK+NVHELEK+QLLQANPILEAFGNAK+QQQLTAMK+QRYEILAANAIPK+SLEADLMQLQEDLAAAER+SMLQDREDQSILCTGESGAGK+TQLEELEDELQATEDAK+TVGQLYK+VDYNASAWLTK+VEDMAELTCLNEASVLHNLR+VIQYLAVVASSH…	1972				GO:0016459 (cytoskeleton, intracellular)	GO:0051015 (binding, macromolecular complex binding) GO:0005524 (binding, carbohydrate derivative binding) GO:0003774 (catalytic activity, hydrolase activity)
19	P35749-2	1	MYH11	Isoform 2 of Myosin-11 OS=Homo sapiens GN=MYH11;Myosin-11 OS=Homo sapiens GN=MYH11 PE=1 SV=3;Myosin, heavy polypeptide 11, smooth muscle, isoform CRA_a OS=Homo sapiens GN=MYH11 PE=4 SV=1	0.35	0.45	0.7	AAAYDKLEK+ALEEALEAK+ALELDPNLYR+CNGVLEGIR+DLELQADSAIKGR+EDQSILCTGESGAGK+EELAEELASSLSGR+FDQLLAEEK+FVADLWK+GNETSFVPSR+HSQLTEEKNLLQEQLQAETELYAEAEEMRVR+IVGLDQMAK+LEAQVQELQSK+LEGDASDFHEQIADLQAQIAELK+LEVNMQALK+LQNEVESVTGMLNEAEGK+LQQELDDLVVDLDNQR+NCAAYLK+NMDPLNDNVTSLLNASSDK+QGFEAASIK+QLLQANPILEAFGNAK+QQQLTAMK+SMLQDREDQSILCTGESGAGK+TQLEELEDELQATEDAK+TVGQLYK+VDYNASAWLTK+VEDMAELTCLNEASVLHNLR+VVSSVLQLGNIVFK+…		Muscle contraction.		GO:0048739 cellular processGO:0048251 cellular component organization or biogenesisGO:0006936 interaction with cells and organismsGO:0030241 cellular component organization or biogenesisGO:0006939 interaction with cells and organisms	GO:0005829 (cytoplasm, intracellular) GO:0070062 (extracellular, extracellular exosome) GO:0042470 (other intracellular organelles, intracellular) GO:0005859 (cytoskeleton, intracellular) GO:0032982 (cytoskeleton, intracellular)	GO:0051015 (binding, macromolecular complex binding) GO:0005524 (binding, carbohydrate derivative binding) GO:0005516 (binding, protein binding) GO:0003774 (catalytic activity, hydrolase activity) GO:0008307 (structural molecule activity, structural constituent of muscle)
20	P78527-2	1	PRKDC	Isoform 2 of DNA-dependent protein kinase catalytic subunit OS=Homo sapiens GN=PRKDC;DNA-dependent protein kinase catalytic subunit OS=Homo sapiens GN=PRKDC PE=1 SV=3	1.8	0.4	1.35	AILELHYSQELSLLYLLQDDVDR+AVAFFLESIAMHDIIAAEK+AYVPALQMAFK+DEVLANR+DPTVHDDVLELEMDELNR+DYVDLFR+EFPPGTPR+FYGELALK+FYGELALKK+GFPPSASLCLLDLVK+GIAPGDER+HNLEIIK+HSSLITPLQAVAQR+IAGFDER+IAPYSVEIK+IIANALSSEPACLAEIEEDK+IMEFTTTLLNTSPEGWK+IPALDLLIK+IPDTVLEK+LGLPGDEVDNK+LLEEALLR+LLQDFNR+LLQIIERYPEETLSLMTK+LLSITVR+LNESTFDTQITK+LPPDVLR+LSFAVPFR+LYSLALHPNAFK+MAVLALLAK+MDPMNIWDDIITNR+MSTSPEAFLALR+NLDLAVLELMQSSVDNTK+…		Serine/threonine-protein kinase that acts as a molecular sensor for DNA damage. Involved in DNA non-homologous end joining (NHEJ) required for double-strand break (DSB) repair and V(D)J recombination. Must be bound to DNA to express its catalytic properties. Promotes processing of hairpin DNA structures in V(D)J recombination by activation of the hairpin endonuclease artemis (DCLRE1C). The assemb…	ATP + a protein = ADP + a phosphoprotein.	GO:0002218 regulationGO:0002326 cellular processGO:0007420 developmental processGO:0008283 single-organism processGO:0006464 cellular processGO:0032869 cellular processGO:0006302 cellular processGO:0097681 cellular processGO:0006303 cellular processGO:0035234 cellular processGO:0007507 developmental processGO:0033152 cellular processGO:0045087 immune system processGO:0008630 regulationGO:0043066 …	GO:0005829 (cytoplasm, intracellular) GO:0005958 (nucleus, intracellular) GO:0016020 (other) GO:0070419 (macromolecular complex, intracellular) GO:0000784 (chromosome, intracellular) GO:0005730 (nucleus, intracellular) GO:0005654 (nucleus, intracellular) GO:0005634 (nucleus, intracellular) GO:0032991 (macromolecular complex) GO:0032993 (macromolecular complex, protein-DNA complex) GO:0005667 (mac…	GO:0005524 (binding, carbohydrate derivative binding) GO:0004677 (catalytic activity, transferase activity) GO:0003690 (binding, heterocyclic compound binding) GO:0019899 (binding, protein binding) GO:0019904 (binding, protein binding) GO:0004672 (catalytic activity, transferase activity) GO:0004674 (catalytic activity, transferase activity) GO:0003723 (binding, heterocyclic compound binding) GO:…
21	P68368	1	Tuba4a	Tubulin alpha-4A chain OS=Mus musculus GN=Tuba4a PE=1 SV=1;Tubulin alpha-4A chain OS=Rattus norvegicus GN=Tuba4a PE=1 SV=1;Tubulin alpha chain (Fragment) OS=Mus musculus GN=Tuba4a PE=1 SV=1;Tubulin alpha chain OS=Cricetulus griseus GN=I79_015306 PE=3 SV=1	2.6875	1.875	0.6875	AVCMLSNTTAIAEAWAR+AYHEQLSVAEITNACFEPANQMVK+DVNAAIAAIK+FDGALNVDLTEFQTNLVPYPR+FDLMYAK+IHFPLATYAPVISAEK+LDHKFDLMYAK+LISQIVSSITASLR+NLDIERPTYTNLNR+PTVIDEIR+QLFHPEQLITGK+RSIQFVDWCPTGFK+SIQFVDWCPTGFK+VGINYQPPTVVPGGDLAK+YMACCLLYR		Tubulin is the major constituent of microtubules. It binds two moles of GTP, one at an exchangeable site on the beta chain and one at a non-exchangeable site on the alpha chain.		GO:0007017 cellular process	GO:0005737 (cytoplasm, intracellular) GO:0005856 (cytoskeleton, intracellular) GO:0005874 (cytoskeleton, intracellular) GO:0015630 (cytoskeleton, intracellular)	GO:0019899 (binding, protein binding) GO:0005525 (binding, carbohydrate derivative binding) GO:0003924 (catalytic activity, hydrolase activity) GO:0019901 (binding, protein binding) GO:0005200 (structural molecule activity, structural constituent of cytoskeleton)
22	P68104-2	1	EEF1A1	Isoform 2 of Elongation factor 1-alpha 1 OS=Homo sapiens GN=EEF1A1;Elongation factor 1-alpha 1 OS=Homo sapiens GN=EEF1A1 PE=1 SV=1;Putative elongation factor 1-alpha-like 3 OS=Homo sapiens GN=EEF1A1P5 PE=5 SV=1;Elongation factor 1-alpha 1 OS=Homo sapiens GN=EEF1A1 PE=1 SV=1;cDNA FLJ52573, highly similar to Elongation factor 1-alpha 1 OS=Homo sapiens PE=2 SV=1;Elongation factor 1-alpha (Fragment) …	1.73333	1.6	1.26667	DGNASGTTLLEALDCILPPTRPTDKPLR+IGGIGTVPVGR+LPLQDVYK+QTVAVGVIK+STTTGHLIYK+VETGVLKPGMVVTFAPVNVTTEVK		This protein promotes the GTP-dependent binding of aminoacyl-tRNA to the A-site of ribosomes during protein biosynthesis. With PARP1 and TXK, forms a complex that acts as a T helper 1 (Th1) cell-specific transcription factor and binds the promoter of IFN-gamma to directly regulate its transcription, and is thus involved importantly in Th1 cytokine production.		GO:0071364 cellular processGO:0043312 cellular processGO:1904714 regulationGO:0006355 regulationGO:0006351 cellular processGO:0006414 cellular process	GO:0030864 (cytoskeleton, cell periphery) GO:0005737 (cytoplasm, intracellular) GO:0098574 (other intracellular organelles, intracellular) GO:0005829 (cytoplasm, intracellular) GO:0005853 (macromolecular complex, intracellular) GO:0070062 (extracellular, extracellular exosome) GO:0005576 (extracellular) GO:0005615 (extracellular, extracellular region part) GO:1904813 (other intracellular organell…	GO:0005525 (binding, carbohydrate derivative binding) GO:0003924 (catalytic activity, hydrolase activity) GO:0019901 (binding, protein binding) GO:0003723 (binding, heterocyclic compound binding) GO:0003746 (binding, heterocyclic compound binding) GO:0000049 (binding, heterocyclic compound binding)
23	P43029-2	1	Gdf7	Isoform 2 of Growth/differentiation factor 7 OS=Mus musculus GN=Gdf7;Growth/differentiation factor 7 OS=Mus musculus GN=Gdf7 PE=2 SV=2	2	2.18182	2.27273	AAAEPPPDPGPGAGSRKANLGGR+GAQGSGGGGGGGGGGGGGGGGGGGGAGR+GAQGSGGGGGGGGGGGGGGGGGGGGAGRGHGR+GAQGSGGGGGGGGGGGGGGGGGGGGAGRGHGRR+RLGFGWPGGGDGGGTAAEER+RTALAGTRGAQGSGGGGGGGGGGGGGGGGGGGGAGR+TALAGTRGAQGSGGGGGGGGGGGGGGGGGGGGAGR+TALAGTRGAQGSGGGGGGGGGGGGGGGGGGGGAGRGHGR				GO:0032924 regulationGO:0007411 cellular component organization or biogenesisGO:0030509 regulationGO:0048754 developmental processGO:0045165 cellular processGO:0030855 cellular processGO:0048853 developmental processGO:0022612 developmental processGO:0030901 developmental processGO:0060571 developmental processGO:0021915 developmental processGO:0060389 regulationGO:0010628 regulationGO:0045666 re…	GO:0005576 (extracellular) GO:0005615 (extracellular, extracellular region part)	GO:0005125 (binding, protein binding) GO:0008083 (binding, protein binding) GO:0042803 (binding, protein binding) GO:0005160 (binding, protein binding)
24	H9FRS8	1	FLNA	Filamin-A isoform 2 OS= GN=FLNA PE=2 SV=1;Filamin-A isoform 1 OS=Macaca mulatta GN=FLNA PE=2 SV=1;Filamin-A isoform 1 OS=Macaca mulatta GN=FLNA PE=2 SV=1;Filamin-A isoform 2 OS=Macaca mulatta GN=FLNA PE=2 SV=1	1.47619	1.04762	1	AEISCTDNQDGTCSVSYLPVLPGDYSILVK+ANLPQSFQVDTSK+APSVANVGSHCDLSLK+ASGPGLNTTGVPASLPVEFTIDAK+DAGEGGLSLAIEGPSK+DAGEGLLAVQITDPEGKPK+DAGYGGLSLSIEGPSK+DGSCGVAYVVQEPGDYEVSVK+DGSCSVEYIPYEAGTYSLNVTYGGHQVPGSPFK+EAGAGGLAIAVEGPSK+EATTEFSVDAR+FNEEHIPDSPFVVPVASPSGDAR+GAGTGGLGLAVEGPSEAK+GLVEPVDVVDNADGTQTVNYVPSR+IANLQTDLSDGLR+IPEISIQDMTAQVTSPSGK+ISETDLSLLTATVVPPSGR+KDGSCGVAYVVQEPGDYEVSVK+LPQLPITNFSR+LQVEPAVDTSGVQCYG…	2647					GO:0051015 (binding, macromolecular complex binding)
25	A0A061HU25	1	H671_xg20754	Filamin-A OS=Cricetulus griseus GN=H671_xg20754 PE=4 SV=1;Filamin-A OS=Cricetulus griseus GN=H671_xg20754 PE=4 SV=1	0.708333	1.33333	1.125	AEISCTDNQDGTCSVSYLPVLPGDYSILVK+ANLPQSFQVDTSK+APSVANVGSHCDLSLK+ASGPGLNTTGVPASLPVEFTIDAK+DAGEGGLSLAIEGPSK+DAGEGLLAVQITDPEGKPK+DAGYGGLSLSIEGPSK+DGSCGVAYVVQEPGDYEVSVK+DGSCSVEYIPYEAGTYSLNVTYGGHQVPGSPFK+EAGAGGLAIAVEGPSK+EATTEFSVDAR+FNEEHIPDSPFVVPVASPSGDAR+GAGTGGLGLAVEGPSEAK+GLVEPVDVVDNADGTQTVNYVPSR+IANLQTDLSDGLR+IPEISIQDMTAQVTSPSGK+ISETDLSLLTATVVPPSGR+KDGSCGVAYVVQEPGDYEVSVK+LPQLPITNFSR+LQVEPAVDTSGVQCYG…	2615					GO:0051015 (binding, macromolecular complex binding)
26	F1PWW0	1	FLNA	Uncharacterized protein OS=Canis familiaris GN=FLNA PE=4 SV=2	1.47619	1.04762	1	AEISCTDNQDGTCSVSYLPVLPGDYSILVK+ANLPQSFQVDTSK+ASGPGLNTTGVPASLPVEFTIDAK+DAGEGGLSLAIEGPSK+DAGEGLLAVQITDPEGKPK+DAGYGGLSLSIEGPSK+DGSCGVAYVVQEPGDYEVSVK+DGSCSVEYIPYEAGTYSLNVTYGGHQVPGSPFK+EAGAGGLAIAVEGPSK+EATTEFSVDAR+FNEEHIPDSPFVVPVASPSGDAR+GAGTGGLGLAVEGPSEAK+GLVEPVDVVDNADGTQTVNYVPSR+IANLQTDLSDGLR+IPEISIQDMTAQVTSPSGK+ISETDLSLLTATVVPPSGR+KDGSCGVAYVVQEPGDYEVSVK+LPQLPITNFSR+LQVEPAVDTSGVQCYGPGIEGQGVFR+LSPFMA…	2646			GO:0051764 cellular component organization or biogenesisGO:0031532 cellular component organization or biogenesisGO:0007195 regulationGO:0060271 cellular component organization or biogenesisGO:0051220 regulationGO:0045184 localizationGO:0090307 cellular component organization or biogenesisGO:0043066 regulationGO:0043433 regulationGO:0042177 regulationGO:0016479 regulationGO:2001046 regulationGO:19…	GO:0005911 (other, cell-cell junction) GO:0005829 (cytoplasm, intracellular) GO:0031941 (cytoskeleton, intracellular) GO:0031523 (chromosome, intracellular) GO:0005730 (nucleus, intracellular) GO:0005886 (plasma membrane, cell periphery)	GO:0051015 (binding, macromolecular complex binding) GO:0034988 (binding, macromolecular complex binding) GO:0001664 (binding, protein binding) GO:0044325 (binding, protein binding) GO:0019900 (binding, protein binding) GO:0015459 (molecular function regulator, channel regulator activity) GO:0042803 (binding, protein binding) GO:0048365 (binding, protein binding) GO:0017160 (binding, protein bind…
27	P15865	1	Hist1h1e	Histone H1.4 OS=Rattus norvegicus GN=Hist1h1e PE=1 SV=3	3.30769	1.30769	1.23077	ALAAAGYDVEK+ASGPPVSELITK+KASGPPVSELITK+SETAPAAPAAPAPAEK+SGVSLAALK	219	Histone H1 protein binds to linker DNA between nucleosomes forming the macromolecular structure known as the chromatin fiber. Histones H1 are necessary for the condensation of nucleosome chains into higher-order structured fibers. Acts also as a regulator of individual gene transcription through chromatin remodeling, nucleosome spacing and DNA methylation (By similarity).		GO:0030261 cellular component organization or biogenesisGO:0098532 cellular component organization or biogenesisGO:0080182 cellular component organization or biogenesisGO:0000122 regulationGO:0006334 cellular component organization or biogenesisGO:0016584 cellular component organization or biogenesis	GO:0000785 (chromosome, intracellular) GO:0005720 (chromosome, intracellular) GO:0000788 (chromosome, intracellular)	GO:0043531 (binding, carbohydrate derivative binding) GO:0016208 (binding, carbohydrate derivative binding) GO:0005524 (binding, carbohydrate derivative binding) GO:0005509 (binding, ion binding) GO:0031490 (binding, chromatin binding) GO:0032564 (binding, carbohydrate derivative binding) GO:0003690 (binding, heterocyclic compound binding) GO:0005525 (binding, carbohydrate derivative binding) GO:…
28	B2RYI2	1	Srp68	Signal recognition particle subunit SRP68 OS=Rattus norvegicus GN=Srp68 PE=1 SV=1	0.851852	0.222222	1.07407	AAEKQIPGGGSGGGGSGGGGGGGGSGGGR+AAEKQIPGGGSGGGGSGGGGGGGGSGGGRSAGGDENK+AEKQIPGGGSGGGGSGGGGGGGGSGGGR+AEKQIPGGGSGGGGSGGGGGGGGSGGGRSAGGDENK+MAAEKQIPGGGSGGGGSGGGGGGGGSGGGR+MAAEKQIPGGGSGGGGSGGGGGGGGSGGGRSAGGDENK+QIPGGGSGGGGSGGGGGGGGSGGGR	625	Signal-recognition-particle assembly has a crucial role in targeting secretory proteins to the rough endoplasmic reticulum membrane.		GO:0045047 localizationGO:0042493 response to stimulusGO:0006614 localization	GO:0005829 (cytoplasm, intracellular) GO:0005783 (er, endomembrane system) GO:0005925 (other, anchoring junction) GO:0005786 (er, intracellular)	GO:0008312 (binding, heterocyclic compound binding) GO:0030942 (binding, amide binding) GO:0019904 (binding, protein binding) GO:0043022 (binding, macromolecular complex binding) GO:0005047 (binding, macromolecular complex binding)
29	E2R0T6	1	HSPA8	Uncharacterized protein OS=Canis familiaris GN=HSPA8 PE=3 SV=1	4.4	0.7	1.6	DAGTIAGLNVLR+FEELNADLFR+GPAVGIDLGTTYSCVGVFQHGK+IINEPTAAAIAYGLDK+IINEPTAAAIAYGLDKK+LIGDAAKNQVAMNPTNTVFDAK+NQVAMNPTNTVFDAK+NSLESYAFNMK+QSAGGMPGGMPGGFPGGGAPP+QTQTFTTYSDNQPGVLIQVYEGER+SFYPEEVSSMVLTK+SINPDEAVAYGAAVQAAILSGDK+SINPDEAVAYGAAVQAAILSGDKSENVQDLLLL+SQIHDIVLVGGSTR+TTPSYVAFTDTER+TVTNAVVTVPAYFNDSQR+VAYGAAVQAAILSGDK+VEIIANDQGNR	646					GO:0005524 (binding, carbohydrate derivative binding)
30	P08238	1	HSP90AB1	Heat shock protein HSP 90-beta OS=Homo sapiens GN=HSP90AB1 PE=1 SV=4;Heat shock protein 90kDa alpha (Cytosolic), class B member 1, isoform CRA_a OS=Homo sapiens GN=HSP90AB1 PE=3 SV=1;cDNA FLJ53619, highly similar to Heat shock protein HSP 90-beta OS=Homo sapiens PE=2 SV=1;cDNA FLJ54023, highly similar to Heat shock protein HSP 90-beta OS=Homo sapiens PE=2 SV=1	6.14286	3.57143	3.42857	ADLINNLGTIAK+ALLFIPR+APFDLFENK+ELISNASDALDK+EQVANSAFVER+GVVDSEDLPLNISR+HFSVEGQLEFR+IDIIPNPQER+NPDDITQEEYGEFYK+SLTNDWEDHLAVK+TLTIVDTGIGMTK+TLTLVDTGIGMTK+YIDQEELNK		Molecular chaperone that promotes the maturation, structural maintenance and proper regulation of specific target proteins involved for instance in cell cycle control and signal transduction. Undergoes a functional cycle that is linked to its ATPase activity. This cycle probably induces conformational changes in the client proteins, thereby causing their activation. Interacts dynamically with var…		GO:0048675 cellular component organization or biogenesisGO:0035690 cellular processGO:0071353 cellular processGO:0071407 cellular processGO:0021955 cellular component organization or biogenesisGO:0051131 cellular component organization or biogenesisGO:0030010 cellular processGO:0038096 regulationGO:0071157 regulationGO:1903660 regulationGO:0043524 regulationGO:1901799 regulationGO:0032435 regulat…	GO:0016324 (plasma membrane, apical part of cell) GO:0034751 (macromolecular complex, intracellular) GO:0044295 (other, cell projection) GO:0016323 (plasma membrane, cell periphery) GO:0031526 (plasma membrane, cell periphery) GO:0009986 (cell surface, cell surface) GO:0005737 (cytoplasm, intracellular) GO:0005829 (cytoplasm, intracellular) GO:0044294 (other, cell projection) GO:0070062 (extracel…	GO:0005524 (binding, carbohydrate derivative binding) GO:0043008 (binding, protein binding) GO:0042623 (catalytic activity, hydrolase activity) GO:0045296 (binding, protein binding) GO:0002135 (binding, carbohydrate derivative binding) GO:0032564 (binding, carbohydrate derivative binding) GO:0097718 (binding, protein binding) GO:0070182 (binding, protein binding) GO:0003725 (binding, heterocyclic…
31	E9PWQ3	1	Col6a3	Collagen, type VI, alpha 3 OS=Mus musculus GN=Col6a3 PE=1 SV=2	1.69231	2.46154	2.46154	ACNLEVILGFDGSR+AEILNLVK+DFVTNLVNSLDVGSDNIR+EELSSLKPILTPSTGAGVGSKK+ELGTIQQVISER+ELPNIEERVMLSFGPSGATPQPPGVDLPSPSRPEKK+EVLLGIVGDLTIAESNCPR+EVYSFASEPNDVFFK+FASEIVDTVYEDGDSIR+GDSVDQCALIQSIR+GELGEIGLDGLDGEEGDKGLPGSSGEK+GETGDIGPMGLPGRDGIPGSPGDPGKDGGSGR+GNSGPPGATGQKGDPGYPGPSGHK+GSQGPPGPIGPPGLIGEQGIPGPRGGGGTAGAPGER+HLPLVAVFSLLLSGIATTHAQQHGDVKNGAAADIVFLVDSSWSAGK+IASNSATAFR+IEEGVPQFLVLISSGK+IGVVQFSNDVFPEFYL…	3284				GO:0005581 (macromolecular complex, protein complex) GO:0031012 (extracellular, extracellular matrix) GO:0005615 (extracellular, extracellular region part) GO:0042383 (plasma membrane, cell periphery)	GO:0004867 (molecular function regulator, enzyme regulator activity)
32	P51881	1	Slc25a5	ADP/ATP translocase 2 OS=Mus musculus GN=Slc25a5 PE=1 SV=3;ADP/ATP translocase 2 OS=Rattus norvegicus GN=Slc25a5 PE=1 SV=3;MCG11560 OS=Mus musculus GN=Slc25a5 PE=1 SV=1	3.33333	1.66667	1.5	AAYFGIYDTAK+DAAVSFAK+DFLAGGVAAAISK+EQGVLSFWR+GGAFVLVLYDEIKK+GLYQGFNVSVQGIIIYR+GMGGAFVLVLYDEIKK+GNLANVIR+GTDIMYTGTLDCWR+GTDIMYTGTLDCWRK+LAADVGK+LAGGVAAAISK+LLLQVQHASK+MMMQSGR+QIFLGGVDK+QIFLGGVDKR+TAVAPIER+TDAAVSFAK+YFAGNLASGGAAGATSLCFVYPLDFAR+YFPTQALNFAFK	298	Catalyzes the exchange of cytoplasmic ADP with mitochondrial ATP across the mitochondrial inner membrane. As part of the mitotic spindle-associated MMXD complex it may play a role in chromosome segregation (By similarity).		GO:1990830 cellular processGO:0007059 cellular processGO:1901029 regulationGO:0008284 regulationGO:0046902 regulation	GO:0016021 (other, membrane part) GO:0045121 (other, membrane part) GO:0005743 (mitochondria, envelope) GO:0042645 (mitochondria, intracellular) GO:0005739 (mitochondria, intracellular) GO:0071817 (cytoskeleton, intracellular) GO:0043209 (other, myelin sheath)	GO:0005471 (transporter, carbohydrate derivative transporter activity) GO:0031625 (binding, protein binding)
33	P47738	1	Aldh2	Aldehyde dehydrogenase, mitochondrial OS=Mus musculus GN=Aldh2 PE=1 SV=1;Putative uncharacterized protein OS=Mus musculus GN=Aldh2 PE=2 SV=1;Putative uncharacterized protein OS=Mus musculus GN=Aldh2 PE=2 SV=1;Putative uncharacterized protein OS=Mus musculus GN=Aldh2 PE=2 SV=1;Aldehyde dehydrogenase 2, mitochondrial, isoform CRA_b OS=Mus musculus GN=Aldh2 PE=1 SV=1	5.22222	2	2.22222	AAFQLGSPWR+EAGFPPGVVNIVPGFGPTAGAAIASHEGVDKVAFTGSTEVGHLIQVAAGSSNLK+EEIFGPVMQILK+ELGEYGLQAYTEVK+FKTIEEVVGR+GYFIQPTVFGDVK+LADLIER+LGPALATGNVVVMK+PLTALYVANLIK+SGQQEGAK+TEQGPQVDETQFK+TFPTVNPSTGEVICQVAEGNK+TFPTVNPSTGEVICQVAEGNKEDVDK+TFVQENVYDEFVER+TIEEVVGR+TIPIDGDFFSYTR+VAEQTPLTALYVANLIK+VVGNPFDSR+YGLAAAVFTK+YYAGWADK	519	Is capable of converting retinaldehyde to retinoic acid.	An aldehyde + NAD(+) + H(2)O = a carboxylate + NADH.	GO:0006068 metabolic processGO:0043066 regulation	GO:0005759 (mitochondria, intracellular) GO:0005739 (mitochondria, intracellular)	GO:0004029 (catalytic activity, oxidoreductase activity) GO:0043878 (catalytic activity, oxidoreductase activity) GO:0042802 (binding, protein binding) GO:0051287 (binding, cofactor binding) GO:0070404 (binding, cofactor binding)
34	P10111	1	Ppia	Peptidyl-prolyl cis-trans isomerase A OS=Rattus norvegicus GN=Ppia PE=1 SV=2	2.41667	1.58333	2.08333	EGMSIVEAMER+FEDENFILK+HTGPGILSMANAGPNTNGSQFFICTAK+IIPGFMCQGGDFTR+KITISDCGQL+TEWLDGK+VCFELFADK+VKEGMSIVEAMER+VNPTVFFDITADGEPLGR	164	PPIase that catalyzes the cis-trans isomerization of proline imidic peptide bonds in oligopeptides and may therefore assist protein folding.	Peptidylproline (omega=180) = peptidylproline (omega=0).	GO:0032515 regulationGO:0006457 cellular processGO:0000413 cellular processGO:0045069 regulation	GO:0005829 (cytoplasm, intracellular) GO:0005576 (extracellular) GO:0005634 (nucleus, intracellular)	GO:0016018 (binding, amide binding) GO:0003755 (catalytic activity, isomerase activity)
35	P31000	1	Vim	Vimentin OS=Rattus norvegicus GN=Vim PE=1 SV=2;Vimentin OS=Cricetulus griseus GN=I79_010171 PE=3 SV=1;Vimentin OS=Rattus norvegicus GN=Vim PE=1 SV=1	4.69231	0.769231	1.07692	DNLAEDIMR+EEAESTLQSFR+EMEENFALEAANYQDTIGR+ETNLESLPLVDTHSK+EYQDLLNVK+FADLSEAANR+ILLAELEQLK+ISLPLPNFSSLNLR+LGDLYEEEMR+LHDEEIQELQAQIQEQHVQIDVDVSKPDLTAALR+LLEGEESR+LLQDSVDFSLADAINTEFK+LQDEIQNMK+LQEEMLQR+NLQEAEEWYK+QQYESVAAK+QVQSLTCEVDALK+QVQSLTCEVDALKGTNESLER+SLYSSSPGGAYVTR+TYSLGSALRPSTSR+VELQELNDR
36	P18418	1	Calr	Calreticulin OS=Rattus norvegicus GN=Calr PE=1 SV=1	1.85714	2.64286	1.5	DMHGDSEYNIMFGPDICGPGTK+DMHGDSEYNIMFGPDICGPGTKK+DPAIYFKEQFLDGDAWTNR+DPDAAKPEDWDER+EQFLDGDAWTNR+FVLSSGK+FYALSAR+GQTLVVQFTVK+IDNSQVESGSLEDDWDFLPPK+IDNSQVESGSLEDDWDFLPPKK+KEEEEAEDKEDEDDRDEDEDEEDEKEEDEEDATGQAK+KPEDWDEEMDGEWEPPVIQNPEYK+LFPGGLDQK+SGTIFDNFLITNDEAYAEEFGNETWGVTK	416	Calcium-binding chaperone that promotes folding, oligomeric assembly and quality control in the endoplasmic reticulum (ER) via the calreticulin/calnexin cycle. This lectin interacts transiently with almost all of the monoglucosylated glycoproteins that are synthesized in the ER. Interacts with the DNA-binding domain of NR3C1 and mediates its nuclear export. Involved in maternal gene expression re…		GO:0055007 cellular processGO:0071285 cellular processGO:0071310 cellular processGO:0090398 cellular processGO:0061077 cellular processGO:0030866 cellular component organization or biogenesisGO:0071157 regulationGO:0033144 regulationGO:0045665 regulationGO:0048387 regulationGO:0000122 regulationGO:0017148 regulationGO:1901164 regulationGO:0002502 cellular component organization or biogenesisGO:00…	GO:0001669 (other intracellular organelles, endomembrane system) GO:0009986 (cell surface, cell surface) GO:0005737 (cytoplasm, intracellular) GO:0005829 (cytoplasm, intracellular) GO:0005783 (er, endomembrane system) GO:0044322 (er, endomembrane system) GO:0009897 (plasma membrane, cell periphery) GO:0031012 (extracellular, extracellular matrix) GO:0005615 (extracellular, extracellular region pa…	GO:0050681 (binding, protein binding) GO:0005509 (binding, ion binding) GO:0030246 (binding, carbohydrate binding) GO:0042562 (binding, hormone binding) GO:0005178 (binding, macromolecular complex binding) GO:0005506 (binding, ion binding) GO:0003729 (binding, heterocyclic compound binding) GO:0042277 (binding, amide binding) GO:0031625 (binding, protein binding) GO:0051082 (binding, protein bind…
37	P08113	1	Hsp90b1	Endoplasmin OS=Mus musculus GN=Hsp90b1 PE=1 SV=2;Heat shock protein 90kDa beta (Grp94), member 1 OS=Mus musculus GN=Hsp90b1 PE=1 SV=1;Putative uncharacterized protein OS=Mus musculus GN=Hsp90b1 PE=2 SV=1;Heat shock protein 90, beta (Grp94), member 1 OS=Mus musculus GN=Hsp90b1 PE=2 SV=1	1.25	1.45	0.95	AQAYQTGK+DDEVDVDGTVEEDLGK+DISTNYYASQK+EEASDYLELDTIK+EEEEEEK+EFEPLLNWMK+ELISNASDALDK+ELISNASDALDKIR+FAFQAEVNR+GVVDSDDLPLNVSR+IYFMAGSSR+IYFMAGSSRK+LIINSLYK+LISLTDENALAGNEELTVK+LTESPCALVASQYGWSGNMER+NLLHVTDTGVGMTR+SILFVPTSAPR+TDDEVVQR+TFEINPR+TVWDWELMNDIKPIWQR+YSQFINFPIYVWSSK	802	Molecular chaperone that functions in the processing and transport of secreted proteins. When associated with CNPY3, required for proper folding of Toll-like receptors. Functions in endoplasmic reticulum associated degradation (ERAD). Has ATPase activity (By similarity).		GO:0031247 cellular component organization or biogenesisGO:0071318 cellular processGO:0043066 regulationGO:0006457 cellular processGO:0043666 regulationGO:0001666 response to stimulusGO:0030970 cellular processGO:0030433 cellular process	GO:0005829 (cytoplasm, intracellular) GO:0005783 (er, endomembrane system) GO:0034663 (er, endomembrane system) GO:0005788 (er, endomembrane system) GO:0005789 (er, endomembrane system) GO:0005576 (extracellular) GO:0042470 (other intracellular organelles, intracellular) GO:0030496 (other, midbody) GO:0048471 (nucleus, intracellular) GO:0005886 (plasma membrane, cell periphery) GO:0032991 (macrom…	GO:0005524 (binding, carbohydrate derivative binding) GO:0050750 (binding, protein binding) GO:0019903 (binding, protein binding) GO:0003723 (binding, heterocyclic compound binding) GO:0051082 (binding, protein binding)
38	P04908	0.9993	HIST1H2AB	Histone H2A type 1-B/E OS=Homo sapiens GN=HIST1H2AB PE=1 SV=2;Histone H2A type 1 OS=Homo sapiens GN=HIST1H2AG PE=1 SV=2;Histone H2A type 1-D OS=Homo sapiens GN=HIST1H2AD PE=1 SV=2;Histone H2A type 2-C OS=Homo sapiens GN=HIST2H2AC PE=1 SV=4;Histone H2A type 2-A OS=Homo sapiens GN=HIST2H2AA3 PE=1 SV=3;Histone H2A type 3 OS=Homo sapiens GN=HIST3H2A PE=1 SV=3;Histone H2A type 1-C OS=Homo sapiens GN=H…	2.21429	1.71429	1.28571	AGLQFPVGR+VTIAQGGVLPNIQAVLLPK	130	Core component of nucleosome. Nucleosomes wrap and compact DNA into chromatin, limiting DNA accessibility to the cellular machineries which require DNA as a template. Histones thereby play a central role in transcription regulation, DNA repair, DNA replication and chromosomal stability. DNA accessibility is regulated via a complex set of post-translational modifications of histones, also called h…		GO:0006342 regulationGO:0008285 regulation	GO:0070062 (extracellular, extracellular exosome) GO:0000790 (chromosome, intracellular) GO:0000786 (chromosome, intracellular) GO:0005634 (nucleus, intracellular)	GO:0003677 (binding, heterocyclic compound binding) GO:0046982 (binding, protein binding)
39	O55148	0.9243	Gas7	Growth arrest-specific protein 7 OS=Rattus norvegicus GN=Gas7 PE=2 SV=2;Isoform 2 of Growth arrest-specific protein 7 OS=Mus musculus GN=Gas7;Growth arrest-specific protein 7 OS=Mus musculus GN=Gas7 PE=1 SV=1;Growth arrest-specific protein 7 OS=Rattus norvegicus GN=Gas7 PE=4 SV=1;Growth arrest-specific protein 7 OS=Mus musculus GN=Gas7 PE=1 SV=1;Growth arrest-specific protein 7 OS=Rattus norvegic…	1.45455	1	0.863636	HETDMFNQSTVEPVDQLLR		May play a role in promoting maturation and morphological differentiation of cerebellar neurons.		GO:0030154 cellular processGO:0007399 developmental process	GO:0005737 (cytoplasm, intracellular)
40	A0A0G2K6S9	1	Myh11	Myosin-11 OS=Rattus norvegicus GN=Myh11 PE=1 SV=1	0.6	0.72	1.48	ALELDPNLYR+ATLQAEQLSNELVTER+DSSITQGPSFAYGELEK+EDQSILCTGESGAGK+EELAEELASSLSGR+EQADFAIEALAK+EVASLGSQLQDTQELLQEETR+HTQAVEELTEQLEQFK+IVQLEEQIEQEAR+KDSSITQGPSFAYGELEK+LEGDASDFHEQIADLQAQIAELK+LEGQLQELQSK+LQDLASTIEVMEEGK+LQNEVESVTGMLNEAEGK+LQQELDDLVVDLDNQR+NFINSPMAQADWVAK+NMDPLNDNVTSLLNASSDK+QIIQANPLLEAFGNAK+QRYEILAANAIPK+SLEAELMQLQEDLAAAER+SMLQDREDQSILCTGESGAGK+TLLQEQLQAETELYAEAEEMR+TQLEELEDELQATEDAK+V…	1979			GO:0048739 cellular processGO:0048251 cellular component organization or biogenesis	GO:0016459 (cytoskeleton, intracellular)	GO:0051015 (binding, macromolecular complex binding) GO:0005524 (binding, carbohydrate derivative binding) GO:0003774 (catalytic activity, hydrolase activity) GO:0008307 (structural molecule activity, structural constituent of muscle)
41	P48679	1	Lmna	Prelamin-A/C OS=Rattus norvegicus GN=Lmna PE=1 SV=1;Prelamin-A/C OS=Rattus norvegicus GN=Lmna PE=1 SV=1;Lamin A, isoform CRA_b OS=Rattus norvegicus GN=Lmna PE=1 SV=1;Lamin C2 (Fragment) OS=Rattus norvegicus GN=C2.1 PE=2 SV=1	1.66667	0.944444	1.11111	EAALSTALSEK+EGDLLAAQAR+IDSLSAQLSQLQK+KEGDLLAAQAR+LADALQELR+LEAALGEAK+MQQQLDEYQELLDIK+NSNLVGAAHEELQQSR+TALINATGEEVAMR		Prelamin-A/C can accelerate smooth muscle cell senescence. It acts to disrupt mitosis and induce DNA damage in vascular smooth muscle cells (VSMCs), leading to mitotic failure, genomic instability, and premature senescence (By similarity).		GO:0090398 cellular processGO:1904178 regulationGO:1903243 regulationGO:0090343 regulationGO:0045669 regulationGO:0034504 localizationGO:0009612 response to stimulusGO:0007283 interaction with cells and organisms	GO:0005882 (cytoskeleton, intracellular) GO:0005635 (nucleus, endomembrane system) GO:0005652 (nucleus, intracellular) GO:0016363 (nucleus, intracellular) GO:0005654 (nucleus, intracellular) GO:0005634 (nucleus, intracellular)	GO:0008157 (binding, protein binding) GO:0005198 (structural molecule activity)
42	Q05962	1	Slc25a4	ADP/ATP translocase 1 OS=Rattus norvegicus GN=Slc25a4 PE=1 SV=3;ADP/ATP translocase 1 OS=Rattus norvegicus GN=Slc25a4 PE=1 SV=1	1.625	1.5	1.125	AAYFGVYDTAK+AGGIAAAVSK+DFLAGGIAAAVSK+EQGFLSFWR+GADIMYTGTVDCWR+GDQALSFLK+GGAFVLVLYDEIKK+GMGGAFVLVLYDEIKK+GNLANVIR+LAADVGK+LLLQVQHASK+MMMQSGR+QIFLGGVDR+TAVAPIER+YFAGNLASGGAAGATSLCFVYPLDFAR+YFPTQALNFAFK	298	Involved in mitochondrial ADP/ATP transport. Catalyzes the exchange of cytoplasmic ADP with mitochondrial ATP across the mitochondrial inner membrane.		GO:0015866 localizationGO:0007568 developmental processGO:0007507 developmental processGO:0001889 developmental processGO:0010667 regulationGO:1902109 regulationGO:0061051 regulationGO:2000277 regulationGO:0070555 response to stimulus	GO:0016021 (other, membrane part) GO:0032592 (mitochondria, envelope) GO:0045121 (other, membrane part) GO:0005743 (mitochondria, envelope) GO:0005741 (mitochondria, envelope) GO:0005739 (mitochondria, intracellular)	GO:0005471 (transporter, carbohydrate derivative transporter activity) GO:0019899 (binding, protein binding)
43	E2RNQ2	1	TUBA1C	Uncharacterized protein (Fragment) OS=Canis familiaris GN=TUBA1C PE=3 SV=2	2.42105	0.789474	1.05263	AEITNACFEPANQMVK+AVCMLSNTTAIAEAWAR+AVFVDLEPTVIDEVR+AYHEQLTVAEITNACFEPANQMVK+DVNAAIATIK+FDGALNVDLTEFQTNLVPYPR+LEFSIYPAPQVSTAVVEPY+LEFSIYPAPQVSTAVVEPYNSILTTH+LISQIVSSITASLR+MLSNTTAIAEAWAR+QIFHPEQLITGK+SIQFVDWCPTGFK+TIGGGDDSFNTFFSETGAGK+VDLEPTVIDEVR+VGINYQPPTVVPGGDLAK+YMACCLLYR	511	Tubulin is the major constituent of microtubules. It binds two moles of GTP, one at an exchangeable site on the beta chain and one at a non-exchangeable site on the alpha chain.		GO:0007017 cellular process	GO:0005881 (cytoskeleton, intracellular)	GO:0005525 (binding, carbohydrate derivative binding) GO:0003924 (catalytic activity, hydrolase activity) GO:0005200 (structural molecule activity, structural constituent of cytoskeleton)
44	E3WI46	1	atp5b	ATP synthase subunit beta OS=Mesocricetus auratus GN=atp5b PE=2 SV=1;ATP synthase subunit beta OS=Cricetulus griseus GN=I79_013474 PE=3 SV=1	1.13636	1.09091	0.772727	AIAELGIYPAVDPLDSTSR+DQEGQDVLLFIDNIFR+EGNDLYHEMIESGVINLK+FLSQPFQVAEVFTGHMGK+FTQAGSEVSALLGR+IGLFGGAGVGK+IMNVIGEPIDER+IPSAVGYQPTLATDMGTMQER+IPVGPETLGR+KGSITSVQAIYVPADDLTDPAPATTF+SLQDIIAILGMDELSEEDK+TIAMDGTEGLVR+TVLIMELINNVAK+VALTGLTVAEYFR+VALVYGQMNEPPGAR+VLDSGAPIKIPVGPETLGR+VVDLLAPYAK	529	Produces ATP from ADP in the presence of a proton gradient across the membrane.	ATP + H(2)O + H(+)(In) = ADP + phosphate + H(+)(Out).	GO:0015986 cellular process	GO:0045261 (macromolecular complex, intracellular)	GO:0005524 (binding, carbohydrate derivative binding) GO:0046933 (catalytic activity, hydrolase activity)
45	P05064	1	Aldoa	Fructose-bisphosphate aldolase A OS=Mus musculus GN=Aldoa PE=1 SV=2;Fructose-bisphosphate aldolase OS=Mus musculus GN=Aldoa PE=1 SV=1;Fructose-bisphosphate aldolase OS=Mus musculus GN=Aldoa PE=1 SV=1	1.81818	3.45455	2.54545	ALQASALK+CQYVTEK+DGADFAK+ELSDIAHR+FSNEEIAMATVTALR+GGVVGIK+GILAADESTGSIAK+GILAADESTGSIAKR+GVVPLAGTNGETTTQGLDGLSER+VDKGVVPLAGTNGETTTQGLDGLSER+VLAAVYK+YASICQQNGIVPIVEPEILPDGDHDLK+YTPSGQSGAAASESLFISNHAY	364	Plays a key role in glycolysis and gluconeogenesis. In addition, may also function as scaffolding protein (By similarity).	D-fructose 1,6-bisphosphate = glycerone phosphate + D-glyceraldehyde 3-phosphate.	GO:0006754 cellular processGO:0007339 cellular processGO:0030388 cellular processGO:0006000 metabolic processGO:0006096 cellular processGO:0061615 cellular processGO:0046716 regulationGO:0030335 regulationGO:0051289 cellular component organization or biogenesisGO:0008360 regulationGO:0006941 interaction with cells and organisms	GO:0015629 (cytoskeleton, intracellular) GO:0005737 (cytoplasm, intracellular) GO:0005829 (cytoplasm, intracellular) GO:0070062 (extracellular, extracellular exosome) GO:0005615 (extracellular, extracellular region part) GO:0031430 (other intracellular organelles, intracellular) GO:0016020 (other) GO:0005739 (mitochondria, intracellular) GO:0043209 (other, myelin sheath) GO:0005720 (chromosome, i…	GO:0008092 (binding, protein binding) GO:0070061 (binding, carbohydrate binding) GO:0004332 (catalytic activity, lyase activity) GO:0042802 (binding, protein binding) GO:0002020 (binding, protein binding)
46	P07823	1	HSPA5	78 kDa glucose-regulated protein OS=Mesocricetus auratus GN=HSPA5 PE=1 SV=1;78 kDa glucose-regulated protein OS=Mesocricetus auratus GN=Hspa5 PE=3 SV=1;78 kDa glucose-regulated protein OS=Cricetulus griseus GN=I79_019946 PE=1 SV=1	2.07143	1.28571	2.14286	DAGTIAGLNVMR+DNHLLGTFDLTGIPPAPR+ELEEIVQPIISK+FEELNMDLFR+IEWLESHQDADIEDFK+IINEPTAAAIAYGLDK+IINEPTAAAIAYGLDKR+ITPSYVAFTPEGER+KELEEIVQPIISK+NELESYAYSLK+NQLTSNPENTVFDAK+SDIDEIVLVGGSTR+SQIFSTASDNQPTVTIK+TFAPEEISAMVLTK+TKPYIQVDIGGGQTK+TLGIETVGGVMTK+TWNDPSVQQDIK+VEIIANDQGNR+VTHAVVTVPAYFNDAQR	654	Endoplasmic reticulum chaperone that plays a key role in protein folding and quality control in the endoplasmic reticulum lumen (By similarity). Involved in the correct folding of proteins and degradation of misfolded proteins via its interaction with DNAJC10/ERdj5, probably to facilitate the release of DNAJC10/ERdj5 from its substrate (By similarity). Acts as a key repressor of the ERN1/IRE1-med…	ATP + H(2)O = ADP + phosphate.	GO:0035437 regulationGO:1903895 regulationGO:0090074 regulationGO:0030335 regulation	GO:0005788 (er, endomembrane system) GO:0043231 (other intracellular organelles, intracellular)	GO:0005524 (binding, carbohydrate derivative binding) GO:0016887 (catalytic activity, hydrolase activity) GO:0019904 (binding, protein binding)
47	F1PIC7	1	HSPA5	Uncharacterized protein OS=Canis familiaris GN=HSPA5 PE=3 SV=2	2.07143	1.28571	2.14286	DAGTIAGLNVMR+DNHLLGTFDLTGIPPAPR+ELEEIVQPIISK+FEELNMDLFR+IEWLESHQDADIEDFK+IINEPTAAAIAYGLDK+IINEPTAAAIAYGLDKR+ITPSYVAFTPEGER+KELEEIVQPIISK+NELESYAYSLK+NQLTSNPENTVFDAK+SDIDEIVLVGGSTR+SQIFSTASDNQPTVTIK+TFAPEEISAMVLTK+TKPYIQVDIGGGQTK+TLGIETVGGVMTK+TWNDPSVQQDIK+VEIIANDQGNR+VTHAVVTVPAYFNDAQR	654			GO:0042149 cellular processGO:0071353 cellular processGO:0021680 developmental processGO:0021589 developmental processGO:0030968 regulationGO:0006983 regulationGO:0035437 regulationGO:0043066 regulationGO:0030512 regulationGO:0030335 regulationGO:0031398 regulationGO:0051603 cellular processGO:1901998 localization	GO:0009986 (cell surface, cell surface) GO:0008180 (nucleus, intracellular) GO:0034663 (er, endomembrane system) GO:0005788 (er, endomembrane system) GO:0005793 (er, intracellular) GO:0030176 (er, endomembrane system) GO:0030496 (other, midbody) GO:0043209 (other, myelin sheath) GO:0005886 (plasma membrane, cell periphery)	GO:0005524 (binding, carbohydrate derivative binding) GO:0016887 (catalytic activity, hydrolase activity) GO:0051787 (binding, protein binding) GO:0019904 (binding, protein binding) GO:0043022 (binding, macromolecular complex binding) GO:0031625 (binding, protein binding)
48	Q3U9G2	1	Hspa5	Putative uncharacterized protein OS=Mus musculus GN=Hspa5 PE=2 SV=1	0.75	1.0625	3.5	DAGTIAGLNVMR+DNHLLGTFDLTGIPPAPR+ELEEIVQPIISK+FEELNMDLFR+GINPDEAVAYGAAVQAGVLSGDQDTGDLVPLDVCPLT+IEIESFFEGEDFSETLTR+IEWLESHQDADIEDFK+IINEPTAAAIAYGLDK+IINEPTAAAIAYGLDKR+ITPSYVAFTPEGER+KELEEIVQPIISK+NELESYAYSLK+NQLTSNPENTVFDAK+SDIDEIVLVGGSTR+SQIFSTASDNQPTVTIK+TFAPEEISAMVLTK+TKPYIQVDIGGGQTK+TLGIETVGGVMTK+TWNDPSVQQDIK+VEIIANDQGNR+VTHAVVTVPAYFNDAQR	655					GO:0005524 (binding, carbohydrate derivative binding)
49	Q9JHU4	1	Dync1h1	Cytoplasmic dynein 1 heavy chain 1 OS=Mus musculus GN=Dync1h1 PE=1 SV=2	3.14286	1.07143	2	AERPDVDEKR+ASVVTLPVYLNFTR+AVDDLNLHSYSNLPIWVNK+DFPLNDLLSATELDK+DSAIQQQVANLQMK+EALELTDTGLLSGSEER+EVDGLDVSK+FGNPLLVQDVESYDPVLNPVLNR+FNALFVRPHIR+FTQDTQPHYIYSPR+GVWSELSK+IFVFEPPPGVK+IMFEVQDLK+INEWLTLVEK+LAETVFNFQEK+LCDEQLSSQSHYDFGLR+LGEDLNKWQALLVQIR+LLNTFLER+LNTQEIFDDWAR+LVPLLLEDGGDAPAALEAALEEK+LVQTPLTDR+MLSAVSQQVQCIQEALR+MVVLSLPR+NTISLLVAGLKK+NVVHELR+QQEVIADK+QTDVLQQLSIQMANAK+RAPVIDADKPVSSQLR+SMANPPA…	4644	Cytoplasmic dynein 1 acts as a motor for the intracellular retrograde motility of vesicles and organelles along microtubules. Dynein has ATPase activity; the force-producing power stroke is thought to occur on release of ADP. Plays a role in mitotic spindle assembly and metaphase plate congression.		GO:0051301 cellular processGO:0003341 cellular processGO:0031122 cellular component organization or biogenesisGO:0033962 cellular component organization or biogenesisGO:0051293 cellular component organization or biogenesisGO:0072382 cellular processGO:0032388 regulationGO:1905832 regulationGO:0090235 regulationGO:0060236 regulationGO:0034063 cellular component organization or biogenesis	GO:0030424 (other, cell projection) GO:0005813 (cytoskeleton, intracellular) GO:0005737 (cytoplasm, intracellular) GO:0005868 (cytoskeleton, intracellular) GO:0030175 (other, cell projection) GO:0002177 (cytoskeleton, intracellular) GO:0005874 (cytoskeleton, intracellular) GO:0043025 (other, cell body) GO:0005635 (nucleus, endomembrane system)	GO:0005524 (binding, carbohydrate derivative binding) GO:0008569 (catalytic activity, hydrolase activity) GO:0045505 (binding, protein binding) GO:0045503 (binding, protein binding) GO:0051959 (binding, protein binding)
50	P22791	1	Hmgcs2	Hydroxymethylglutaryl-CoA synthase, mitochondrial OS=Rattus norvegicus GN=Hmgcs2 PE=1 SV=1;Hydroxymethylglutaryl-CoA synthase, mitochondrial OS=Mus musculus GN=Hmgcs2 PE=1 SV=2;Hydroxymethylglutaryl-CoA synthase OS=Rattus norvegicus GN=Hmgcs2 PE=1 SV=1;Hydroxymethylglutaryl-CoA synthase OS=Mus musculus GN=Hmgcs2 PE=2 SV=1	2.14286	1.42857	1.42857	APLVLEQGLR+KIQNQWK+LEVGTETIIDK+LMFNDFLSSSSDK+LPWDAVGR+LSIQCYLR+LVSSVSDLPK+MSPEEFTEIMNQR+PTGGAGAVAMLIGPK+QAGNNQPFTLDDVQYMIFHTPFCK+VNFSPPGDTSNLFPGTWYLER+YTVGLGQTR	508	This enzyme condenses acetyl-CoA with acetoacetyl-CoA to form HMG-CoA, which is the substrate for HMG-CoA reductase.	Acetyl-CoA + H(2)O + acetoacetyl-CoA = (S)-3-hydroxy-3-methylglutaryl-CoA + CoA.	GO:0060612 developmental processGO:0007420 developmental processGO:0071230 cellular processGO:0071398 cellular processGO:0071385 cellular processGO:0032870 cellular processGO:0032869 cellular processGO:0071222 cellular processGO:0071407 cellular processGO:0006695 metabolic processGO:0008299 cellular processGO:0046951 cellular processGO:0001822 developmental processGO:0001889 developmental process…	GO:0005759 (mitochondria, intracellular) GO:0005739 (mitochondria, intracellular)	GO:0004421 (catalytic activity, transferase activity)
51	D4AE63	0.9233	RGD1309821	RCG55123, isoform CRA_a OS=Rattus norvegicus GN=RGD1309821 PE=1 SV=1	1.29167	0.625	1.08333	TAGRPDGPGPER	716			GO:0005975 metabolic processGO:0043568 regulationGO:0051897 regulationGO:0048741 cellular process	GO:0005789 (er, endomembrane system) GO:0016021 (other, membrane part) GO:0031965 (nucleus, endomembrane system)	GO:0004553 (catalytic activity, hydrolase activity)
52	Q8K3B1	1	Fbxo45	F-box/SPRY domain-containing protein 1 OS=Mus musculus GN=Fbxo45 PE=1 SV=2	2.33333	1.83333	2.16667	AAPGPGAGAASGGASGGGAGAGGGASAGSGSSGVGGR+AAPGPGAGAASGGASGGGAGAGGGASAGSGSSGVGGRLPSR+MAAPGPGAGAASGGASGGGAGAGGGASAGSGSSGVGGR+MAAPGPGAGAASGGASGGGAGAGGGASAGSGSSGVGGRLPSR+MAAPGPGAGAASGGASGGGAGAGGGASAGSGSSGVGGRLPSRVLELVFSYLELSELR	286	Component of E3 ubiquitin ligase complexes. Required for normal neuromuscular synaptogenesis, axon pathfinding and neuronal migration. Plays a role in the regulation of neurotransmission at mature neurons (By similarity). May control synaptic activity by controlling UNC13A via ubiquitin dependent pathway. Specifically recognizes TP73, promoting its ubiquitination and degradation (By similarity).		GO:0021960 cellular component organization or biogenesisGO:0006974 cellular processGO:0021799 cellular processGO:0021800 cellular processGO:0021957 cellular component organization or biogenesisGO:0060384 developmental processGO:0001764 cellular processGO:0043161 cellular processGO:0016567 cellular processGO:0060386 cellular component organization or biogenesisGO:0006511 cellular process	GO:0030054 (other) GO:0014069 (other, postsynapse) GO:0045211 (plasma membrane, cell periphery) GO:0042734 (plasma membrane, cell periphery) GO:0045202 (other)
53	G3HDT6	1	I79_008702	Histone H2A type 1 OS=Cricetulus griseus GN=I79_008702 PE=3 SV=1	7.71429	3.85714	0.857143	AAVLEYLTAEILELAGNAARDNKK+AGLQFPVGR+ALAAAGYDVEK+ASGPPVSELITK+VGAGAPVYLAAVL+VTIAQGGVLPNIQAV+VTIAQGGVLPNIQAVLLPK	331			GO:0006334 cellular component organization or biogenesis	GO:0000786 (chromosome, intracellular) GO:0005634 (nucleus, intracellular)	GO:0003677 (binding, heterocyclic compound binding) GO:0046982 (binding, protein binding)
54	P62962	1	Pfn1	Profilin-1 OS=Mus musculus GN=Pfn1 PE=1 SV=2;Profilin-1 OS=Rattus norvegicus GN=Pfn1 PE=1 SV=2;Profilin OS=Mus musculus GN=Pfn1 PE=1 SV=1	2.15	0.65	1.25	AGWNAYIDSLMADGTCQDAAIVGYK+CYEMASHLR+DSLLQDGEFTMDLR+DSPSVWAAVPGK+EGVHGGLINK+SSFFVNGLTLGGQK+STGGAPTFNVTVTMTAK+TFVSITPAEVGVLVGK	140	Binds to actin and affects the structure of the cytoskeleton. At high concentrations, profilin prevents the polymerization of actin, whereas it enhances it at low concentrations. By binding to PIP2, it inhibits the formation of IP3 and DG. Inhibits androgen receptor (AR) and HTT aggregation and binding of G-actin is essential for its inhibition of AR (By similarity).		GO:0030036 cellular component organization or biogenesisGO:0071363 cellular processGO:0032232 regulationGO:0030837 regulationGO:0051497 regulationGO:0001843 developmental processGO:0032233 regulationGO:0030838 regulationGO:0032781 regulationGO:0051054 regulationGO:0010634 regulationGO:1900029 regulationGO:0051496 regulationGO:0045944 regulationGO:0050434 regulationGO:0050821 regulationGO:0008064 …	GO:0005938 (cytoplasm, cell periphery) GO:0005737 (cytoplasm, intracellular) GO:0005856 (cytoskeleton, intracellular) GO:0005829 (cytoplasm, intracellular) GO:0005576 (extracellular) GO:0005615 (extracellular, extracellular region part) GO:0043005 (other, cell projection) GO:0005634 (nucleus, intracellular) GO:0098794 (other, postsynapse) GO:0098793 (other, neuron part) GO:0045202 (other)	GO:0003779 (binding, protein binding) GO:0003785 (binding, protein binding) GO:0000774 (binding, heterocyclic compound binding) GO:0005546 (binding, ion binding) GO:0070064 (binding, protein binding) GO:0017048 (binding, protein binding) GO:0005102 (binding, protein binding)
55	P07355	1	ANXA2	Annexin A2 OS=Homo sapiens GN=ANXA2 PE=1 SV=2;Annexin OS=Homo sapiens GN=ANXA2 PE=3 SV=1;Annexin OS=Homo sapiens GN=HEL-S-270 PE=2 SV=1	1.2381	0.857143	1.38095	AEDGSVIDYELIDQDARDLYDAGVKR+ALLYLCGGDD+DALNIETAIK+DLYDAGVKR+ELASALK+GLGTDEDSLIEIICSR+GVDEVTIVNILTNR+NIETAIK+SALSGHLETVILGLLK+SEVDMLK+STVHEILCK+SYSPYDMLESIR+WISIMTER+YDAGVKR		Calcium-regulated membrane-binding protein whose affinity for calcium is greatly enhanced by anionic phospholipids. It binds two calcium ions with high affinity. May be involved in heat-stress response. Inhibits PCSK9-enhanced LDLR degradation, probably reduces PCSK9 protein levels via a translational mechanism but also competes with LDLR for binding with PCSK9 (PubMed:18799458, PubMed:24808179, …		GO:0001525 developmental processGO:0007589 regulationGO:0052362 regulationGO:0030199 cellular component organization or biogenesisGO:0042730 regulationGO:0035722 regulationGO:0001765 cellular component organization or biogenesisGO:0052405 regulationGO:0044147 regulationGO:0032804 regulationGO:0043312 cellular processGO:0036035 cellular processGO:0048146 regulationGO:1905581 regulationGO:1905597 r…	GO:0035578 (other intracellular organelles, endomembrane system) GO:0005604 (extracellular, extracellular matrix) GO:0016323 (plasma membrane, cell periphery) GO:0005938 (cytoplasm, cell periphery) GO:0009986 (cell surface, cell surface) GO:0005913 (other, anchoring junction) GO:0005737 (cytoplasm, intracellular) GO:0005829 (cytoplasm, intracellular) GO:0005769 (endosome, endomembrane system) GO:…	GO:0044730 (binding, extracellular matrix binding) GO:0098641 (binding, protein binding) GO:0005509 (binding, ion binding) GO:0005544 (binding, ion binding) GO:0048306 (binding, protein binding) GO:0008092 (binding, protein binding) GO:0042802 (binding, protein binding) GO:0098772 (molecular function regulator) GO:0005546 (binding, ion binding) GO:0019834 (molecular function regulator, enzyme reg…
56	F6R0C8	1	MYH11	Uncharacterized protein OS=Macaca mulatta GN=MYH11 PE=3 SV=1;Uncharacterized protein OS=Macaca mulatta GN=MYH11 PE=3 SV=1;Uncharacterized protein OS=Macaca mulatta GN=MYH11 PE=3 SV=1;Uncharacterized protein OS=Macaca mulatta GN=MYH11 PE=3 SV=1;Uncharacterized protein OS=Macaca mulatta GN=EGK_12535 PE=3 SV=1;Putative uncharacterized protein OS=Macaca fascicularis GN=EGM_11504 PE=3 SV=1	1.2	1.86667	1.4	ALELDPNLYR+EDQSILCTGESGAGK+EELAEELASSLSGR+FDQLLAEEK+ILEQEEYQR+LQNEVESVTGMLNEAEGK+LQQELDDLVVDLDNQR+LVWVPSEK+NMDPLNDNVTSLLNASSDK+QIIQANPLLEAFGNAK+QRYEILAANAIPK+SLEADLMQLQEDLAAAER+SMLQDREDQSILCTGESGAGK+TQLEELEDELQATEDAK+VDYNASAWLTK+VEDMAELTCLNEASVLHNLR+VVSSVLQLGNIVFK	1938				GO:0016459 (cytoskeleton, intracellular)	GO:0051015 (binding, macromolecular complex binding) GO:0005524 (binding, carbohydrate derivative binding) GO:0003774 (catalytic activity, hydrolase activity)
57	P16858	1	Gapdh	Glyceraldehyde-3-phosphate dehydrogenase OS=Mus musculus GN=Gapdh PE=1 SV=2;Glyceraldehyde-3-phosphate dehydrogenase OS=Mus musculus GN=Gapdh PE=1 SV=1;Glyceraldehyde-3-phosphate dehydrogenase OS=Mus musculus GN=GAPDH PE=2 SV=1	1.35294	1.64706	1.88235	AAICSGK+GAAQNIIPASTGAAK+HAITATQK+IVSNASCTTNCLAPLAK+LISWYDNEYGYSNR+LTGMAFR+LVINGKPITIFQER+QASEGPLK+VIISAPSADAPMFVMGVNHEK+VPTPNVSVVDLTCR+VSVVDLTCR+VVDLMAYMASK+VVDLMAYMASKE
58	Q8VEK3-2	1	Hnrnpu	Isoform 2 of Heterogeneous nuclear ribonucleoprotein U OS=Mus musculus GN=Hnrnpu;Heterogeneous nuclear ribonucleoprotein U OS=Mus musculus GN=Hnrnpu PE=1 SV=1;Heterogeneous nuclear ribonucleoprotein U OS=Rattus norvegicus GN=Hnrnpu PE=1 SV=1;Putative uncharacterized protein OS=Mus musculus GN=Hnrnpu PE=2 SV=1;Putative uncharacterized protein OS=Mus musculus GN=Hnrnpu PE=2 SV=1;SP120 OS=Rattus nor…	1.75	3.75	1.25	EKPYFPIPEDCTFIQNVPLEDR+FDENDVITCFANFETDEVELSYAK+GNFTLPEVAECFDEITYVELQK+GYFEYIEENK+LNTLLQR+LQAALDNEAGGRPAMEPGNGSLDLGGDAAGR+MCLFAGFQR+NFILDQTNVSAAAQR+SSGPTSLFAVTVAPPGAR+YNILGTNTIMDK		DNA- and RNA-binding protein involved in several cellular processes such as nuclear chromatin organization, telomere-length regulation, transcription, mRNA alternative splicing and stability, Xist-mediated transcriptional silencing and mitotic cell progression (PubMed:20833368, PubMed:21235343, PubMed:22162999, PubMed:26244333). Plays a role in the regulation of interphase large-scale gene-rich c…		GO:1990845 metabolic processGO:0055013 cellular processGO:0007049 cellular processGO:0051301 cellular processGO:0071549 cellular processGO:0071385 cellular processGO:1990830 cellular processGO:0006325 cellular component organization or biogenesisGO:0032922 regulationGO:0070934 regulationGO:0009048 regulationGO:0051457 regulationGO:0006397 cellular processGO:0048255 regulationGO:0033673 regulation…	GO:0071013 (nucleus, intracellular) GO:0009986 (cell surface, cell surface) GO:0005813 (cytoskeleton, intracellular) GO:0000777 (chromosome, intracellular) GO:0070937 (macromolecular complex, intracellular) GO:0036464 (nucleus, intracellular) GO:0032839 (cytoplasm, cell projection) GO:0098577 (chromosome, intracellular) GO:0000776 (chromosome, intracellular) GO:0030496 (other, midbody) GO:0072686…	GO:0003779 (binding, protein binding) GO:0005524 (binding, carbohydrate derivative binding) GO:0003682 (binding, chromatin binding) GO:0031490 (binding, chromatin binding) GO:0003677 (binding, heterocyclic compound binding) GO:0003690 (binding, heterocyclic compound binding) GO:0003725 (binding, heterocyclic compound binding) GO:0042802 (binding, protein binding) GO:0003730 (binding, heterocyclic…
59	P70390-2	0.9998	Shox2	Isoform 2 of Short stature homeobox protein 2 OS=Mus musculus GN=Shox2;Short stature homeobox protein 2 OS=Mus musculus GN=Shox2 PE=2 SV=1	1.61111	1.16667	1.5	AAGGGGGAGGGGGGGGGGGGGAGGGGAGGGAGGGR+AAGGGGGAGGGGGGGGGGGGGAGGGGAGGGAGGGRSPVR+AAGGGGGAGGGGGGGGGGGGGAGGGGAGGGAGGGRSPVRELDMGAAER+DDRSSPAVRAAGGGGGAGGGGGGGGGGGGGAGGGGAGGGAGGGR+SSPAVRAAGGGGGAGGGGGGGGGGGGGAGGGGAGGGAGGGR+SSPAVRAAGGGGGAGGGGGGGGGGGGGAGGGGAGGGAGGGRSPVR		May be a growth regulator and have a role in specifying neural systems involved in processing somatosensory information, as well as in face and body structure formation. May also have a role in heart development.		GO:0003209 developmental processGO:0060351 developmental processGO:0002063 cellular processGO:0002062 cellular processGO:0048557 developmental processGO:0035115 developmental processGO:0030326 developmental processGO:0048598 developmental processGO:0060272 developmental processGO:0003170 developmental processGO:0060415 developmental processGO:0000122 regulationGO:0001649 cellular processGO:005077…	GO:0005634 (nucleus, intracellular)	GO:0043565 (binding, heterocyclic compound binding) GO:0001227 (nucleic acid binding transcription factor activity, transcription factor activity, sequence-specific DNA binding)
60	Q9HBR0-3	0.8744	SLC38A10	Isoform 3 of Putative sodium-coupled neutral amino acid transporter 10 OS=Homo sapiens GN=SLC38A10;Putative sodium-coupled neutral amino acid transporter 10 OS=Homo sapiens GN=SLC38A10 PE=1 SV=2;Putative sodium-coupled neutral amino acid transporter 10 (Fragment) OS=Homo sapiens GN=SLC38A10 PE=1 SV=6;Putative sodium-coupled neutral amino acid transporter 10 (Fragment) OS=Homo sapiens GN=SLC38A10 …	0.875	0.666667	1.625	QEDEEDKPR		Putative sodium-dependent amino acid/proton antiporter.		GO:0003333 localizationGO:0060348 developmental processGO:0006814 localization	GO:0005794 (other intracellular organelles, endomembrane system) GO:0016021 (other, membrane part)	GO:0015171 (transporter, substrate-specific transporter activity)
61	P68373	1	Tuba1c	Tubulin alpha-1C chain OS=Mus musculus GN=Tuba1c PE=1 SV=1;Tubulin alpha chain OS=Mus musculus GN=Tuba1c PE=2 SV=1;Tubulin alpha chain OS=Mus musculus GN=Tuba1c PE=1 SV=1	2.42105	0.789474	1.05263	AVCMLSNTTAIAEAWAR+AVFVDLEPTVIDEVR+FDGALNVDLTEFQTNLVPYPR+GDVVPKDVNAAIATIKTK+LISQIVSSITASLR+QLFHPEQLITGK+TIGGGDDSFNTFFSETGAGK+TIQFVDWCPTGFK+VGINYQPPTVVPGGDLAK+VQRAVCMLSNTTAIAEAWARLDHK+YMACCLLYR	449	Tubulin is the major constituent of microtubules. It binds two moles of GTP, one at an exchangeable site on the beta chain and one at a non-exchangeable site on the alpha chain.		GO:0007017 cellular process	GO:0005881 (cytoskeleton, intracellular) GO:0045121 (other, membrane part) GO:0015630 (cytoskeleton, intracellular) GO:0005634 (nucleus, intracellular)	GO:0005525 (binding, carbohydrate derivative binding) GO:0003924 (catalytic activity, hydrolase activity) GO:0005200 (structural molecule activity, structural constituent of cytoskeleton)
62	P11442	1	Cltc	Clathrin heavy chain 1 OS=Rattus norvegicus GN=Cltc PE=1 SV=3;Clathrin heavy chain OS=Rattus norvegicus GN=Cltc PE=1 SV=1;Clathrin heavy chain OS=Cricetulus griseus GN=I79_010729 PE=3 SV=1	2.63636	3.09091	2.09091	ADDPSSYMEVVQAANTSGNWEELVK+AFMTADLPNELIELLEK+AMLSANIR+AQILPIR+AVDVFFPPEAQNDFPVAMQISEK+AYEFAER+DTELAEELLQWFLQEEKR+EHLELFWSR+FNALFAQGNYSEAAK+FQEHLQLQNLGINPANIGFSTLTMESDK+FQSVPAQPGQTSPLLQYFGILLDQGQLNK+GQCDLELINVCNENSLFK+GQFSTDELVAEVEK+GQFSTDELVAEVEKR+ISGETIFVTAPHEATAGIIGVNR+ISGETIFVTAPHEATAGIIGVNRK+KFNALFAQGNYSEAAK+KVGYTPDWIFLLR+LAELEEFINGPNNAHIQQVGDR+LHIIEVGTPPTGNQPFPK+LLYNNVSNFGR+LPVVIGGLLDVDCSEDVI…	1675	Clathrin is the major protein of the polyhedral coat of coated pits and vesicles. Two different adapter protein complexes link the clathrin lattice either to the plasma membrane or to the trans-Golgi network (By similarity). Acts as component of the TACC3/ch-TOG/clathrin complex proposed to contribute to stabilization of kinetochore fibers of the mitotic spindle by acting as inter-microtubule bri…		GO:0006914 cellular processGO:0048268 cellular component organization or biogenesisGO:0007030 cellular component organization or biogenesisGO:0006886 localizationGO:0000278 cellular processGO:1900126 regulationGO:0006898 localization	GO:0030118 (macromolecular complex, intracellular) GO:0030132 (plasma membrane, cell periphery) GO:0030130 (other intracellular organelles, endomembrane system) GO:0071439 (macromolecular complex, intracellular) GO:0030669 (endosome, intracellular) GO:0042470 (other intracellular organelles, intracellular) GO:0042383 (plasma membrane, cell periphery) GO:0005819 (cytoskeleton, intracellular) GO:00…	GO:0030506 (binding, protein binding) GO:0032051 (binding, protein binding) GO:0031072 (binding, protein binding) GO:0042277 (binding, amide binding) GO:0008022 (binding, protein binding) GO:0005198 (structural molecule activity)
63	P35579	1	MYH9	Myosin-9 OS=Homo sapiens GN=MYH9 PE=1 SV=4;Myosin, heavy polypeptide 9, non-muscle, isoform CRA_a OS=Homo sapiens GN=MYH9 PE=4 SV=1	7.88889	1.11111	1.22222	ADFCIIHYAGK+AGVLAHLEEER+ANLQIDQINTDLNLER+ASITALEAK+CNGVLEGIR+DFSALESQLQDTQELLQEENR+EDQSILCTGESGAGK+EQADFAIEALAK+EQLEEEEEAK+FDQLLAEEK+IIGLDQVAGMSETALPGAFK+LEGDSTDLSDQIAELQAQIAELK+LEVNLQAMK+LQVELDNVTGLLSQSDSK+LTEMETLQSQLMAEK+NFINNPLAQADWAAK+QLLQANPILEAFGNAK+TDLLLEPYNK+TQLEELEDELQATEDAK+VEAQLQELQVK+VISGVLQLGNIVFK+YEILTPNSIPK		Cellular myosin that appears to play a role in cytokinesis, cell shape, and specialized functions such as secretion and capping. During cell spreading, plays an important role in cytoskeleton reorganization, focal contacts formation (in the margins but not the central part of spreading cells), and lamellipodial retraction; this function is mechanically antagonized by MYH10.		GO:0031532 cellular component organization or biogenesisGO:0030048 cellular processGO:0031032 cellular component organization or biogenesisGO:0001525 developmental processGO:0043534 cellular processGO:0032506 cellular processGO:0051295 cellular component organization or biogenesisGO:0001768 cellular processGO:0001701 developmental processGO:0007229 regulationGO:0050900 cellular processGO:0000212 …	GO:0015629 (cytoskeleton, intracellular) GO:0042641 (cytoskeleton, intracellular) GO:0005826 (cytoskeleton, cell division site) GO:0005903 (other, cluster of actin-based cell projections) GO:0031252 (other, cell leading edge) GO:0005913 (other, anchoring junction) GO:0032154 (cell surface, cell division site) GO:0005737 (cytoplasm, intracellular) GO:0005829 (cytoplasm, intracellular) GO:0070062 (…	GO:0003779 (binding, protein binding) GO:0051015 (binding, macromolecular complex binding) GO:0030898 (catalytic activity, hydrolase activity) GO:0043531 (binding, carbohydrate derivative binding) GO:0005524 (binding, carbohydrate derivative binding) GO:0016887 (catalytic activity, hydrolase activity) GO:0045296 (binding, protein binding) GO:0005516 (binding, protein binding) GO:0000146 (catalyti…
64	Q6P6R6	1	Tgm2	Transglutaminase 2, C polypeptide OS=Rattus norvegicus GN=Tgm2 PE=2 SV=1;Tissue-type transglutaminase OS=Rattus norvegicus GN=Tgm2 PE=1 SV=1	1.5	0.5	0.607143	DLYLENPEIK+EYVLTQQGFIYQGSVK+GLLVEPAANSYLLAER+GYEASVDR+LTFGAVTGPDPSEEAGTK+LTLYFEGR+LVAEVSLK+LVVNFQCDK+NPLSDSLYDCVFTVEGAGLTK+SEGTYCCGPVSVR+SINNSLVVGQK+SVEVSDPVPAGDAVK+TVSYNGVLGPECGTEDINLTLDPYSENSIPLR+VGDGMSLGNDFDVFAHIGNDTSESR+VVSGMVNCNDDQGVLLGR+YSGCLTESNLIK	686			GO:0001974 interaction with cells and organismsGO:0018153 cellular processGO:0043065 regulationGO:0051482 regulationGO:0043123 regulationGO:0050729 regulationGO:0048661 regulationGO:0051260 cellular component organization or biogenesis	GO:0005739 (mitochondria, intracellular) GO:0005886 (plasma membrane, cell periphery)	GO:0019899 (binding, protein binding) GO:0005525 (binding, carbohydrate derivative binding) GO:0046872 (binding, ion binding) GO:0019904 (binding, protein binding) GO:0003810 (catalytic activity, transferase activity)
65	P14602-2	1	Hspb1	Isoform B of Heat shock protein beta-1 OS=Mus musculus GN=Hspb1;Heat shock protein beta-1 OS=Mus musculus GN=Hspb1 PE=1 SV=3;Heat shock protein beta-1 OS=Rattus norvegicus GN=Hspb1 PE=1 SV=1;Heat shock 27kDa protein 1 OS=Rattus norvegicus GN=Hspb1 PE=1 SV=1;Hspb1 protein OS=Mus musculus GN=Hspb1 PE=2 SV=1	2.18182	3	2.09091	AVTQSAEITIPVTFEAR+EGVVEITGK+KYTLPPGVDPTLVSSSLSPEGTLTVEAPLPK+LFDQAFGVPR+QLSSGVSEIR+VPFSLLR+VSLDVNHFAPEELTVK		Small heat shock protein which functions as a molecular chaperone probably maintaining denatured proteins in a folding-competent state. Plays a role in stress resistance and actin organization (PubMed:17661394). Through its molecular chaperone activity may regulate numerous biological processes including the phosphorylation and the axonal transport of neurofilament proteins (By similarity).		GO:0099641 cellular processGO:0035924 cellular processGO:0061077 cellular processGO:0035556 regulationGO:2001234 regulationGO:1903202 regulationGO:1902176 regulationGO:0006469 regulationGO:0045766 regulationGO:0043536 regulationGO:2001028 regulationGO:0038033 regulationGO:0032731 regulationGO:0010976 regulationGO:0042535 regulationGO:0043122 regulationGO:0001932 regulationGO:0006986 response to s…	GO:0030424 (other, cell projection) GO:1904115 (cytoplasm, cell projection) GO:0097512 (other intracellular organelles, intracellular) GO:0043292 (other intracellular organelles, intracellular) GO:0005737 (cytoplasm, intracellular) GO:0030425 (other, cell projection) GO:0031674 (other intracellular organelles, intracellular) GO:0005622 (other, intracellular) GO:0031430 (other intracellular organe…	GO:0042802 (binding, protein binding) GO:0044183 (binding, protein binding) GO:0042803 (binding, protein binding) GO:0019901 (binding, protein binding) GO:0005080 (binding, protein binding) GO:0008426 (molecular function regulator, enzyme regulator activity) GO:0043130 (binding, protein binding)
66	P17182	1	Eno1	Alpha-enolase OS=Mus musculus GN=Eno1 PE=1 SV=3;Enolase 1, alpha non-neuron OS=Mus musculus GN=EG433182 PE=1 SV=1	1.13636	1.95455	0.409091	AAVPSGASTGIYEALELR+AGYTDQVVIGMDVAASEFYR+DATNVGDEGGFAPNILENK+GNPTVEVDLYTAK+HIADLAGNPEVILPVPAFNVINGGSHAGNK+IDKLMIEMDGTENK+IEEELGSK+IGAEVYHNLK+LAMQEFMILPVGASSFR+LMIEMDGTENK+SGETEDTFIADLVVGLCTGQIK+VNQIGSVTESLQACK+VNVVEQEK+YITPDQLADLYK+YNQILRIEEELGSK	434	Multifunctional enzyme that, as well as its role in glycolysis, plays a part in various processes such as growth control, hypoxia tolerance and allergic responses (By similarity). May also function in the intravascular and pericellular fibrinolytic system due to its ability to serve as a receptor and activator of plasminogen on the cell surface of several cell-types such as leukocytes and neurons…	2-phospho-D-glycerate = phosphoenolpyruvate + H(2)O.	GO:0006096 cellular processGO:0001701 developmental processGO:0051099 regulation	GO:0099738 (cytoplasm, cell periphery) GO:0009986 (cell surface, cell surface) GO:0005737 (cytoplasm, intracellular) GO:0005829 (cytoplasm, intracellular) GO:0019897 (plasma membrane, cell periphery) GO:0030426 (other, cell projection) GO:0016020 (other) GO:0045121 (other, membrane part) GO:0043209 (other, myelin sheath) GO:0043005 (other, cell projection) GO:0000015 (macromolecular complex, intr…	GO:0019899 (binding, protein binding) GO:0051020 (binding, protein binding) GO:0031072 (binding, protein binding) GO:0000287 (binding, ion binding) GO:0004634 (catalytic activity, lyase activity) GO:0046982 (binding, protein binding) GO:0042803 (binding, protein binding) GO:0003723 (binding, heterocyclic compound binding) GO:0000977 (binding, heterocyclic compound binding) GO:0001078 (nucleic aci…
67	Q04857	1	Col6a1	Collagen alpha-1(VI) chain OS=Mus musculus GN=Col6a1 PE=1 SV=1	3.33333	1.41667	1.58333	DAEEVISQTIDTIVDMIK+ENYAELLDDGFLK+FEPGQSHAGVVQY+GPEGPQGPPGHVGPPGPDECEILDIIMK+GVLYQTVSR+IALVITDGR+TAEYDVAFGER+VAVVQYSGQGQQQPGR+VFSVAITPDHLEPR+VLLFSDGNSQGATAEAIEK+VPNYQALLR	1025	Collagen VI acts as a cell-binding protein.		GO:0007155 interaction with cells and organismsGO:0071230 cellular processGO:0035987 cellular processGO:0070208 cellular component organization or biogenesis	GO:0005581 (macromolecular complex, protein complex) GO:0031012 (extracellular, extracellular matrix) GO:0005576 (extracellular) GO:0005615 (extracellular, extracellular region part) GO:0032991 (macromolecular complex) GO:0042383 (plasma membrane, cell periphery)	GO:0048407 (binding, protein binding)
68	P12346	1	Tf	Serotransferrin OS=Rattus norvegicus GN=Tf PE=1 SV=3;Serotransferrin OS=Rattus norvegicus GN=Tf PE=1 SV=1;Ab2-417 OS=Rattus norvegicus GN=Tf PE=2 SV=1	1.5	1.1	1	ADRDQYELLCLDNTR+ASDSSINWNNLK+DCTGNFCLFR+DFQLFGSPLGK+DGGGDVAFVK+DLKQEDFQLLCPDGTK+DQYELLCLDNTR+DSAFGLLR+EDLIWEILK+EGVCPEGSIDSAPVK+EGYNGYTGAFQCLVEK+FDEFFSQGCAPGYK+GTDFQLNQLQGK+GYYAVAVVK+HQTVLENTNGK+HTTIFEVLPQKADRDQYELLCLDNTR+IPSHAVVAR+KGTDFQLNQLQGK+KPVDQYEDCYLAR+LPEGTTYEEYLGAEYLQAVGNIR+QEDFQLLCPDGTK+QEDFQLLCPDGTKKPVTEFATCHLAQAPNHVVVSR+TAGWNIPMGLLFSR+TVLPADGPR+VSTVLTAQK		Transferrins are iron binding transport proteins which can bind two Fe(3+) ions in association with the binding of an anion, usually bicarbonate. It is responsible for the transport of iron from sites of absorption and heme degradation to those of storage and utilization. Serum transferrin may also have a further role in stimulating cell proliferation.		GO:0006953 response to stimulusGO:0006915 cellular processGO:0006879 regulationGO:0071320 cellular processGO:0071372 cellular processGO:0015682 localizationGO:0006826 localizationGO:0031643 regulationGO:0070447 regulationGO:0001666 response to stimulusGO:0010288 response to stimulusGO:0014070 response to stimulus	GO:0005604 (extracellular, extracellular matrix) GO:0051286 (other, cell tip) GO:0005615 (extracellular, extracellular region part)	GO:0008199 (binding, ion binding) GO:0015091 (transporter, substrate-specific transporter activity)
69	Q8WZ42-11	1	TTN	Isoform 11 of Titin OS=Homo sapiens GN=TTN;Isoform 12 of Titin OS=Homo sapiens GN=TTN;Isoform 13 of Titin OS=Homo sapiens GN=TTN;Isoform 2 of Titin OS=Homo sapiens GN=TTN;Isoform 4 of Titin OS=Homo sapiens GN=TTN;Isoform 7 of Titin OS=Homo sapiens GN=TTN;Isoform 8 of Titin OS=Homo sapiens GN=TTN;Titin OS=Homo sapiens GN=TTN PE=1 SV=4;Titin OS=Homo sapiens GN=TTN PE=1 SV=1	2.57143	1.5	2.07143	AAEVPAPIR+AGSSPPSKPTEYVTAR+APEIIDVSSK+ASEAPSPPDSLNIMDITK+ASNVAGSDTTK+CGPGEPAYVDEPVNMSTPATVPDPPENVK+DAVTLTWCEPDDDGGSPITGYWVER+DDVVAPDLDLK+DGKELEETAAR+DGTLLKPAEGIK+DHGESLDK+DIENQTVLK+DLIPNGEYFFR+DMCSAQLSVK+DSLRPDHGLYMIK+DVWMPVTSASAK+ECSAVLTVLEPAR+EDVGHYVVK+EIAAPELEPLHLR+ELTIGSK+EPGPPGTPFVTSISK+EQLEPPEIDMK+FCAVISGRPQPK+FILNVQSKPTAEVK+GEALLQTPDCEIK+GLPDLCYLAK+GRPAPEVTWTK+GSDFWVEAGHTK+GSDQWTHITTVK+GTQ…		Key component in the assembly and functioning of vertebrate striated muscles. By providing connections at the level of individual microfilaments, it contributes to the fine balance of forces between the two halves of the sarcomere. The size and extensibility of the cross-links are the main determinants of sarcomere extensibility properties of muscle. In non-muscle cells, seems to play a role in c…	ATP + a protein = ADP + a phosphoprotein.	GO:0060048 interaction with cells and organismsGO:0048739 cellular processGO:0003300 interaction with cells and organismsGO:0055008 developmental processGO:0055003 cellular component organization or biogenesisGO:0035995 response to stimulusGO:0007076 cellular component organization or biogenesisGO:0006936 interaction with cells and organismsGO:0030049 cellular processGO:0002576 cellular processGO…	GO:0000794 (chromosome, intracellular) GO:0005829 (cytoplasm, intracellular) GO:0070062 (extracellular, extracellular exosome) GO:0005576 (extracellular) GO:0031674 (other intracellular organelles, intracellular) GO:0031430 (other intracellular organelles, intracellular) GO:0005859 (cytoskeleton, intracellular) GO:0005865 (cytoskeleton, intracellular) GO:0030018 (other intracellular organelles, i…	GO:0051015 (binding, macromolecular complex binding) GO:0042805 (binding, protein binding) GO:0005524 (binding, carbohydrate derivative binding) GO:0005509 (binding, ion binding) GO:0005516 (binding, protein binding) GO:0019899 (binding, protein binding) GO:0042802 (binding, protein binding) GO:0051371 (binding, protein binding) GO:0002020 (binding, protein binding) GO:0019901 (binding, protein b…
70	P16086	1	Sptan1	Spectrin alpha chain, non-erythrocytic 1 OS=Rattus norvegicus GN=Sptan1 PE=1 SV=2;Spectrin alpha chain, non-erythrocytic 1 OS=Rattus norvegicus GN=Sptan1 PE=1 SV=1;Spectrin alpha chain, non-erythrocytic 1 OS=Rattus norvegicus GN=Sptan1 PE=1 SV=1	2.75	1.1875	1	ALINADELANDVAGAEALLDR+ALSSEGKPYVTK+DLAALEDK+DLASVQALLR+DLIGVQNLLK+DLMSWINGIR+DLSSVQTLLTK+DLTGVQNLR+DVDETIGWIK+EAIVTSEELGQDLEHVEVLQK+ELPTAFDYVEFTR+EQLMASDDFGR+GVIDMGNSLIER+HQAFEAEVQANSGAIVK+KFEEFQTDLAAHEER+KHALLEADVAAHQDR+KHQLLEADISAHEDRLK+KLLVSSEDYGR+KLSDDNTIGQEEIQQR+LDPAQSASR+LEESLEYQQFVANVEEEEAWINEK+LGDSHDLQR+LLVSSEDYGR+LQQSHPLSANQIQVK+LQTASDESYKDPTNIQSK+LQVASDENYKDPTNLQGK+LSELNQKWEALK+MQHNLEQQ…		Fodrin, which seems to be involved in secretion, interacts with calmodulin in a calcium-dependent manner and is thus candidate for the calcium-dependent movement of the cytoskeleton at the membrane.		GO:0031532 cellular component organization or biogenesisGO:0051693 regulation	GO:0005829 (cytoplasm, intracellular) GO:0005886 (plasma membrane, cell periphery) GO:0032991 (macromolecular complex) GO:0008091 (cytoskeleton, cell periphery)	GO:0003779 (binding, protein binding) GO:0005509 (binding, ion binding) GO:0005516 (binding, protein binding) GO:0044877 (binding, macromolecular complex binding) GO:0030507 (binding, protein binding) GO:0019905 (binding, protein binding)
71	F1PJ01	1	MYH11	Uncharacterized protein OS=Canis familiaris GN=MYH11 PE=4 SV=2	2	3.4	1.9	ALELDPNLYR+EDQSILCTGESGAGK+EQADFAIEALAK+FDQLLAEEK+ILEQEEYQR+LQNEVESVTGMLNEAEGK+LQQELDDLVVDLDNQR+LVWVPSEK+NMDPLNDNVTSLLNASSDK+QIIQANPLLEAFGNAK+QRYEILAANAIPK+SLEADLMQLQEDLAAAER+SMLQDREDQSILCTGESGAGK+TQLEELEDELQATEDAK+VDYNASAWLTK+VEDMAELTCLNEASVLHNLR+VVSSVLQLGNIVFK	1972			GO:0048739 cellular processGO:0048251 cellular component organization or biogenesis	GO:0016459 (cytoskeleton, intracellular)	GO:0051015 (binding, macromolecular complex binding) GO:0005524 (binding, carbohydrate derivative binding) GO:0003774 (catalytic activity, hydrolase activity) GO:0008307 (structural molecule activity, structural constituent of muscle)
72	D3ZUL3	1	Col6a1	Collagen type VI alpha 1 chain OS=Rattus norvegicus GN=Col6a1 PE=1 SV=1	3.08333	1.08333	1.83333	DAEETISQTIDTIVDMIK+DSMDFINDATDVNDALSYVTR+DTTPLSVLCGSDIQVVSVGIK+ENYAELLDDGFLK+GVLYQTVSR+IALVITDGR+NNVEQVCCTFECQAAR+TAEYDVAFGER+VAVVQYSGQGQQQPGR+VFSVAITPDHLEPR+VLLFSDGNSQGATAEAIEK+VPNYQALLR	1025			GO:0071230 cellular processGO:0035987 cellular processGO:0070208 cellular component organization or biogenesis	GO:0031012 (extracellular, extracellular matrix) GO:0005576 (extracellular) GO:0032991 (macromolecular complex) GO:0042383 (plasma membrane, cell periphery)	GO:0048407 (binding, protein binding)
73	P46782	0.9999	RPS5	40S ribosomal protein S5 OS=Homo sapiens GN=RPS5 PE=1 SV=4;Ribosomal protein S5, isoform CRA_a OS=Homo sapiens GN=RPS5 PE=3 SV=1;40S ribosomal protein S5 (Fragment) OS=Homo sapiens GN=RPS5 PE=1 SV=1;40S ribosomal protein S5 OS=Homo sapiens GN=RPS5 PE=1 SV=1;Ribosomal protein S5 variant (Fragment) OS=Homo sapiens PE=2 SV=1;Ribosomal protein S5 (Fragment) OS=Macaca fascicularis PE=2 SV=1	2.54545	1.36364	4	TIAECLADELINAAK+YLPHSAGR	204			GO:0000184 cellular processGO:0006450 regulationGO:0000028 cellular component organization or biogenesisGO:0006614 localizationGO:0006412 cellular processGO:0006413 cellular process	GO:0005829 (cytoplasm, intracellular) GO:0022627 (ribosome, intracellular) GO:0070062 (extracellular, extracellular exosome) GO:0005925 (other, anchoring junction) GO:0016020 (other) GO:0005654 (nucleus, intracellular) GO:1990904 (nucleus, ribonucleoprotein complex)	GO:0003729 (binding, heterocyclic compound binding) GO:0003723 (binding, heterocyclic compound binding) GO:0019843 (binding, heterocyclic compound binding) GO:0003735 (structural molecule activity, structural constituent of ribosome)
74	A0A087WSQ4	0.9981	Kcnma1	Calcium-activated potassium channel subunit alpha-1 OS=Mus musculus GN=Kcnma1 PE=1 SV=1	1.57143	1.78571	2.14286	ANGGGGGGGSSGGGGGGGGGSGLR+LFLAESPTVLGLTSQMCGC+MANGGGGGGGSSGGGGGGGGGSGLR+VQGTSASLSPLLALDVAR	191				GO:0016021 (other, membrane part)	GO:0060072 (transporter, substrate-specific transporter activity)
75	Q60932-2	1	Vdac1	Isoform Mt-VDAC1 of Voltage-dependent anion-selective channel protein 1 OS=Mus musculus GN=Vdac1;Voltage-dependent anion-selective channel protein 1 OS=Mus musculus GN=Vdac1 PE=1 SV=3;Voltage-dependent anion-selective channel protein 1 OS=Rattus norvegicus GN=Vdac1 PE=1 SV=4	2.84615	1.61538	1.76923	GALVLGYEGWLAGYQMNFETSK+GYGFGLIK+GYGFGLIKLDLK+LETAVNLAWTAGNSNTR+LGLGLEFQA+LTFDSSFSPNTGK+LTLSALLDGK+PPTYADLGK+SRVTQSNFAVGYK+TDEFQLHTNVNDGTEFGGSIYQK+VNNSSLIGLGYTQTLKPGIK+VTQSNFAVGYK+WNTDNTLGTEITVEDQLAR+WTEYGLTFTEK+YQVDPDACFSAK		Forms a channel through the mitochondrial outer membrane and also the plasma membrane. The channel at the outer mitochondrial membrane allows diffusion of small hydrophilic molecules; in the plasma membrane it is involved in cell volume regulation and apoptosis. It adopts an open conformation at low or zero membrane potential and a closed conformation at potentials above 30-40 mV. The open state …		GO:0006820 localizationGO:0006915 cellular processGO:0001662 behaviorGO:0007268 cellular processGO:0030855 cellular processGO:0007612 behaviorGO:0006851 localizationGO:2000378 regulationGO:0007270 cellular processGO:1903146 regulation	GO:0016020 (other) GO:0045121 (other, membrane part) GO:0005743 (mitochondria, envelope) GO:0042645 (mitochondria, intracellular) GO:0005741 (mitochondria, envelope) GO:0005757 (mitochondria, envelope) GO:0005739 (mitochondria, intracellular) GO:0043209 (other, myelin sheath) GO:0005886 (plasma membrane, cell periphery) GO:0032991 (macromolecular complex) GO:0008021 (other intracellular organelle…	GO:0005253 (transporter, substrate-specific transporter activity) GO:0042802 (binding, protein binding) GO:0044325 (binding, protein binding) GO:0000166 (binding, heterocyclic compound binding) GO:0015288 (transporter, transmembrane transporter activity) GO:0019901 (binding, protein binding) GO:0044877 (binding, macromolecular complex binding) GO:0008308 (transporter, substrate-specific transport…
76	Q01149	1	Col1a2	Collagen alpha-2(I) chain OS=Mus musculus GN=Col1a2 PE=1 SV=2;Procollagen, type I, alpha 2 OS=Mus musculus GN=Col1a2 PE=1 SV=1	4	1.23077	0.615385	DGARGIPGAVGAPGPAGASGDR+DGVDGPMGPPGPPGSPGPPGSPAPPGLTGNFAAQYSDKGVSSGPGPMGLMGPR+GATGLPGVAGAPGLPGPRGIPGPAGAAGATGAR+GDGGPPGMTGFPGAAGRTGPPGPSGIAGPPGPPGAAGK+GEAGAVGAPGSAGASGPGGLPGERGAAGIPGGK+GENGIVGPTGSVGAAGPSGPNGPPGPVGSR+GEPGAPGENGTPGQAGAR+GEPGAPGENGTPGQAGARGLPGER+GEPGPAGSVGPVGAVGPR+GEPGSVGAQGPPGPSGEEGKRGSPGEAGSAGPAGPPGLR+GERGLPGIAGALGEPGPLGISGPPGARGPPGAVGSPGVNGAPGEAGR+GERGTPGESGAAGPSGPIGSRGPSGAPGPDGNK…	1372	Type I collagen is a member of group I collagen (fibrillar forming collagen).		GO:0001568 developmental processGO:0071230 cellular processGO:0030199 cellular component organization or biogenesisGO:0070208 cellular component organization or biogenesisGO:0008217 regulationGO:0007266 regulationGO:0001501 developmental processGO:0043589 developmental processGO:0007179 regulation	GO:0005581 (macromolecular complex, protein complex) GO:0005584 (extracellular, extracellular matrix) GO:0005783 (er, endomembrane system) GO:0031012 (extracellular, extracellular matrix) GO:0005615 (extracellular, extracellular region part)	GO:0005201 (structural molecule activity, extracellular matrix structural constituent) GO:0042802 (binding, protein binding) GO:0046872 (binding, ion binding) GO:0048407 (binding, protein binding) GO:0002020 (binding, protein binding) GO:0030674 (binding, binding, bridging) GO:0046332 (binding, protein binding)
77	Q8CJG0	0.8494	Ago2	Protein argonaute-2 OS=Mus musculus GN=Ago2 PE=1 SV=3;Protein argonaute-2 OS=Rattus norvegicus GN=Ago2 PE=2 SV=2;Protein argonaute-2 OS=Cricetulus griseus GN=H671_2g5730 PE=3 SV=1;Protein argonaute-2 OS=Rattus norvegicus GN=Ago2 PE=1 SV=2;Protein argonaute-2 OS=Cricetulus griseus GN=AGO2 PE=3 SV=1;Eif2c2 protein (Fragment) OS=Mus musculus GN=Ago2 PE=2 SV=1;Eif2c2 protein (Fragment) OS=Mus musculu…	3.44444	2.22222	4	KPSIAAVVGSMDAHPNR		Required for RNA-mediated gene silencing (RNAi) by the RNA-induced silencing complex (RISC). The 'minimal RISC' appears to include AGO2 bound to a short guide RNA such as a microRNA (miRNA) or short interfering RNA (siRNA). These guide RNAs direct RISC to complementary mRNAs that are targets for RISC-mediated gene silencing. The precise mechanism of gene silencing depends on the degree of complem…	Endonucleolytic cleavage to 5'-phosphomonoester.	GO:0030154 cellular processGO:0031047 regulationGO:0035280 regulationGO:0035278 regulationGO:0010586 cellular processGO:0035279 regulationGO:0090625 regulationGO:0045947 regulationGO:0045766 regulationGO:0010628 regulationGO:1905618 regulationGO:1900153 regulationGO:0060213 regulationGO:0045944 regulationGO:1901165 regulationGO:0009791 developmental processGO:0031054 regulationGO:0035196 regulati…	GO:0030054 (other) GO:0005737 (cytoplasm, intracellular) GO:0005829 (cytoplasm, intracellular) GO:0030425 (other, cell projection) GO:0070062 (extracellular, extracellular exosome) GO:0035068 (nucleus, intracellular) GO:0005739 (mitochondria, intracellular) GO:0005845 (macromolecular complex, intracellular) GO:0005654 (nucleus, intracellular) GO:0005634 (nucleus, intracellular) GO:0000932 (nucleu…	GO:0001047 (binding, heterocyclic compound binding) GO:0003725 (binding, heterocyclic compound binding) GO:0004521 (catalytic activity, hydrolase activity) GO:0090624 (catalytic activity, hydrolase activity) GO:0070551 (catalytic activity, hydrolase activity) GO:0046872 (binding, ion binding) GO:0035198 (binding, heterocyclic compound binding) GO:0003729 (binding, heterocyclic compound binding) G…
78	P62629	1	EEF1A1	Elongation factor 1-alpha 1 OS=Cricetulus griseus GN=EEF1A1 PE=2 SV=1;Elongation factor 1-alpha OS=Cricetulus griseus PE=3 SV=1	3.27273	2.72727	1.63636	EHALLAYTLGVK+IGGIGTVPVGR+IGYNPDTVAFVPISGWNGDNMLEPSANMPWFK+LPLQDVYK+PGMVVTFAPVNVTTEVK+SGDAAIVDMVPGKPMCVESFSDYPPLGR+VETGVLKPGMVVTFAPVNVTTEVK	462	This protein promotes the GTP-dependent binding of aminoacyl-tRNA to the A-site of ribosomes during protein biosynthesis. With PARP1 and TXK, forms a complex that acts as a T helper 1 (Th1) cell-specific transcription factor and binds the promoter of IFN-gamma to directly regulate its transcription, and is thus involved importantly in Th1 cytokine production.		GO:0071364 cellular process	GO:0005737 (cytoplasm, intracellular) GO:0043209 (other, myelin sheath) GO:0005730 (nucleus, intracellular) GO:0005634 (nucleus, intracellular) GO:0005886 (plasma membrane, cell periphery)	GO:0005516 (binding, protein binding) GO:0005525 (binding, carbohydrate derivative binding) GO:0003924 (catalytic activity, hydrolase activity) GO:0003746 (binding, heterocyclic compound binding)
79	A0A061ICE4	1	H671_2g6948	ATP synthase subunit alpha OS=Cricetulus griseus GN=H671_2g6948 PE=3 SV=1;ATP synthase subunit alpha OS=Mesocricetus auratus GN=atp5a1 PE=2 SV=1	2	2.14286	1.07143	AVDSLVPIGR+EVAAFAQFGSDLDAATQQLLSR+GMSLNLEPDNVGVVVFGNDK+ILGADTSVDLEETGR+NVQAEEMVEFSSGLK+QGQYSPMAIEEQVAVIYAGVR+RLTDADAM+TMKLELAQYREVAAFAQFGSDLDAATQQLLSR+TSIAIDTIINQK+VLSIGDGIAR+VVDALGNAIDGK	553	Produces ATP from ADP in the presence of a proton gradient across the membrane.		GO:0015986 cellular processGO:0006629 metabolic processGO:0001937 regulationGO:0043536 regulation	GO:0008180 (nucleus, intracellular) GO:0005753 (mitochondria, envelope) GO:0043209 (other, myelin sheath) GO:0005886 (plasma membrane, cell periphery) GO:0045261 (macromolecular complex, intracellular)	GO:0043532 (binding, protein binding) GO:0005524 (binding, carbohydrate derivative binding) GO:0042288 (binding, protein binding) GO:0046933 (catalytic activity, hydrolase activity)
80	P08249	1	Mdh2	Malate dehydrogenase, mitochondrial OS=Mus musculus GN=Mdh2 PE=1 SV=3	2.26316	0.684211	0.736842	AGAALRRSFSTSAQNNAKVAVLGASGGIGQPLSLLLK+AGAGSATLSMAYAGAR+DIAHTPGVAADLSHIETR+ETECTYFSTPLLLGK+FVFSLVDAMNGK+GCDVVVIPAGVPR+GYLGPEQLPDCLK+IFGVTTLDIVR+IQEAGTEVVKAK+MIAEAIPELK+PGVAADLSHIETR+TIIPLISQCTPK+VAVLGASGGIGQPLSLLLK+VDFPQDQLATLTGR+VNVPVIGGHAGK			(S)-malate + NAD(+) = oxaloacetate + NADH.	GO:0009060 cellular processGO:0005975 metabolic processGO:0006475 cellular processGO:0006108 cellular processGO:0006734 cellular processGO:0006107 cellular processGO:0006099 cellular process	GO:0016020 (other) GO:0005743 (mitochondria, envelope) GO:0005759 (mitochondria, intracellular) GO:0005739 (mitochondria, intracellular) GO:0043209 (other, myelin sheath)	GO:0030060 (catalytic activity, oxidoreductase activity) GO:0046554 (catalytic activity, oxidoreductase activity) GO:0016615 (catalytic activity, oxidoreductase activity) GO:0042803 (binding, protein binding) GO:0043621 (binding, protein binding)
81	P46462	1	Vcp	Transitional endoplasmic reticulum ATPase OS=Rattus norvegicus GN=Vcp PE=1 SV=3;Transitional endoplasmic reticulum ATPase OS=Mus musculus GN=Vcp PE=1 SV=4	1.69231	2.76923	2.23077	AIANECQANFISIK+DVDLEFLAK+ELQELVQYPVEHPDK+ETVVEVPQVTWEDIGGLEDVK+ETVVEVPQVTWEDIGGLEDVKR+EVDIGIPDATGR+GDDLSTAILK+GILLYGPPGTGK+LADDVDLEQVANETHGHVGADLAALCSEAALQAIR+LDQLIYIPLPDEK+LGDVISIQPCPDVK+LIVDEAINEDNSVVSLSQPK+MDELQLFR+MTNGFSGADLTEICQR+NAPAIIFIDELDAIAPK+QAAPCVLFFDELDSIAK+VINQILTEMDGMSTK+VVETDPSPYCIVAPDTVIHCEGEPIK+WALSQSNPSALR+YEMFAQTLQQSR	806	Necessary for the fragmentation of Golgi stacks during mitosis and for their reassembly after mitosis. Involved in the formation of the transitional endoplasmic reticulum (tER). The transfer of membranes from the endoplasmic reticulum to the Golgi apparatus occurs via 50-70 nm transition vesicles which derive from part-rough, part-smooth transitional elements of the endoplasmic reticulum (tER) (P…	ATP + H(2)O = ADP + phosphate.	GO:0006919 regulationGO:0070842 cellular component organization or biogenesisGO:0046034 cellular processGO:0097352 cellular component organization or biogenesisGO:0006914 cellular processGO:1903843 cellular processGO:0006974 cellular processGO:0034605 cellular processGO:0006302 cellular processGO:0032510 localizationGO:0006888 localizationGO:0071712 cellular processGO:0036503 cellular processGO:0…	GO:1904949 (macromolecular complex, catalytic complex) GO:0010494 (nucleus, intracellular) GO:0005829 (cytoplasm, intracellular) GO:0036513 (er, endomembrane system) GO:0005783 (er, endomembrane system) GO:0043231 (other intracellular organelles, intracellular) GO:0005811 (other intracellular organelles, intracellular) GO:0043209 (other, myelin sheath) GO:0005654 (nucleus, intracellular) GO:00484…	GO:0043531 (binding, carbohydrate derivative binding) GO:0005524 (binding, carbohydrate derivative binding) GO:0016887 (catalytic activity, hydrolase activity) GO:1904288 (binding, macromolecular complex binding) GO:0035800 (molecular function regulator, enzyme regulator activity) GO:0042802 (binding, protein binding) GO:0036435 (binding, protein binding) GO:0008289 (binding, lipid binding) GO:00…
82	Q8BWT1	1	Acaa2	3-ketoacyl-CoA thiolase, mitochondrial OS=Mus musculus GN=Acaa2 PE=1 SV=3;Putative uncharacterized protein OS=Mus musculus GN=Acaa2 PE=2 SV=1	1.75	1.1875	2.0625	AALSAGK+AANEAGYFNEEMAPIEVK+ALDLDPSK+LEDTLWAGLTDQHVK+LPMGMTAENLAAK+QTMQVDEHARPQTTLEQLQK+TNVSGGAIALGHPLGGSGSR+TPFGAYGGLLK+VGVPTETGALTLNR+VPPETIDSVIVGNVMQSSSDAAYLAR+YNISREDCDRYALQSQQR	397	Abolishes BNIP3-mediated apoptosis and mitochondrial damage.	Acyl-CoA + acetyl-CoA = CoA + 3-oxoacyl-CoA.	GO:0006084 cellular processGO:0071456 cellular processGO:0006635 cellular processGO:1902109 regulationGO:1901029 regulation	GO:0005743 (mitochondria, envelope) GO:0005759 (mitochondria, intracellular) GO:0005739 (mitochondria, intracellular)	GO:0003988 (catalytic activity, transferase activity)
83	P48678-2	1	Lmna	Isoform C of Prelamin-A/C OS=Mus musculus GN=Lmna;Prelamin-A/C OS=Mus musculus GN=Lmna PE=1 SV=2	1.38889	1.16667	1.16667	AQHEDQVEQYKK+AQNTWGCGSSLR+EAALSTALSEK+EGDLLAAQAR+GAAHEELQQSR+IDSLSAQLSQLQK+KEGDLLAAQAR+LADALQELR+LVEIDNGK+MQQQLDEYQELLDIK+NSNLVGAAHEELQQSR+SNEDQSMGNWQIR+TLDSVAK		Prelamin-A/C can accelerate smooth muscle cell senescence. It acts to disrupt mitosis and induce DNA damage in vascular smooth muscle cells (VSMCs), leading to mitotic failure, genomic instability, and premature senescence (By similarity).		GO:0034613 localizationGO:0071456 cellular processGO:0030010 cellular processGO:0030951 cellular component organization or biogenesisGO:0007517 developmental processGO:1904178 regulationGO:1903243 regulationGO:0008285 regulationGO:2001237 regulationGO:0072201 regulationGO:0090201 regulationGO:0006998 cellular component organization or biogenesisGO:0006997 cellular component organization or biogen…	GO:0005638 (nucleus, intracellular) GO:0005635 (nucleus, endomembrane system) GO:0016363 (nucleus, intracellular) GO:0031965 (nucleus, endomembrane system) GO:0005654 (nucleus, intracellular) GO:0005634 (nucleus, intracellular) GO:0048471 (nucleus, intracellular)	GO:0042802 (binding, protein binding) GO:0008157 (binding, protein binding) GO:0005198 (structural molecule activity)
84	C0HKE1	0.9812	Hist1h2ab	Histone H2A type 1-B OS=Mus musculus GN=Hist1h2ab PE=1 SV=1;Histone H2A type 1-C OS=Mus musculus GN=Hist1h2ac PE=1 SV=1;Histone H2A type 1-D OS=Mus musculus GN=Hist1h2ad PE=1 SV=1;Histone H2A type 1-E OS=Mus musculus GN=Hist1h2ae PE=1 SV=1;Histone H2A type 1-G OS=Mus musculus GN=Hist1h2ag PE=1 SV=1;Histone H2A type 1-I OS=Mus musculus GN=Hist1h2ai PE=1 SV=1;Histone H2A type 1-N OS=Mus musculus GN…	17	11.6667	3.33333	AGLQFPVGR+VTIAQGGVLPNIQAVLLPK	130	Core component of nucleosome. Nucleosomes wrap and compact DNA into chromatin, limiting DNA accessibility to the cellular machineries which require DNA as a template. Histones thereby play a central role in transcription regulation, DNA repair, DNA replication and chromosomal stability. DNA accessibility is regulated via a complex set of post-translational modifications of histones, also called h…		GO:0008285 regulation	GO:0000786 (chromosome, intracellular) GO:0005634 (nucleus, intracellular)	GO:0003677 (binding, heterocyclic compound binding) GO:0046982 (binding, protein binding)
85	P11980-2	1	Pkm	Isoform M2 of Pyruvate kinase PKM OS=Rattus norvegicus GN=Pkm	0.714286	0.75	1.07143	AATESFASDPILYRPVAVALDTK+AEGSDVANAVLDGADCIMLSGETAK+APIIAVTR+CDENILWLDYK+GADYLVTEVENGGSLGSK+GDLGIEIPAEK+GVNLPGAAVDLPAVSEK+IYVDDGLISLQVK+KGVNLPGAAVDLPAVSEK+LAPITSDPTEAAAVGAVEASFK+LDIDSAPITAR+LNFSHGTHEYHAETIK+MQHLIAR+NTGIICTIGPASR+PKPDSEAGTAFIQTQQLHAAMADTFLEHMCR+RFDEILEASDGIMVAR		Glycolytic enzyme that catalyzes the transfer of a phosphoryl group from phosphoenolpyruvate (PEP) to ADP, generating ATP. Stimulates POU5F1-mediated transcriptional activation (By similarity).	ATP + pyruvate = ADP + phosphoenolpyruvate.	GO:0031100 developmental processGO:0006754 cellular processGO:0032869 cellular processGO:0006006 metabolic processGO:0006096 cellular processGO:0001889 developmental processGO:0012501 cellular processGO:0051289 cellular component organization or biogenesisGO:0042866 cellular processGO:0009629 response to stimulusGO:0001666 response to stimulusGO:0032868 response to stimulusGO:0014870 response to …	GO:0005737 (cytoplasm, intracellular) GO:0005829 (cytoplasm, intracellular) GO:0005634 (nucleus, intracellular) GO:1902912 (macromolecular complex, catalytic complex)	GO:0043531 (binding, carbohydrate derivative binding) GO:0005524 (binding, carbohydrate derivative binding) GO:0042802 (binding, protein binding) GO:0016301 (catalytic activity, transferase activity) GO:0000287 (binding, ion binding) GO:0030955 (binding, ion binding) GO:0004743 (catalytic activity, transferase activity) GO:0070324 (binding, hormone binding)
86	P00507	1	Got2	Aspartate aminotransferase, mitochondrial OS=Rattus norvegicus GN=Got2 PE=1 SV=2	0.487805	0.365854	0.609756	ASAELALGENSEVLK+DAGMQLQGYR+EYLPIGGLADFCK+FVTVQTISGTGALR+IAATILTSPDLR+IPEQSVLLLHACAHNPTGVDPRPEQWK+ISVAGVTSGNVGYLAH+MNLGVGAYR+PILGVTEAFK+TCGFDFSGALEDISK	430	Catalyzes the irreversible transamination of the L-tryptophan metabolite L-kynurenine to form kynurenic acid (KA). Plays a key role in amino acid metabolism. Important for metabolite exchange between mitochondria and cytosol. Facilitates cellular uptake of long-chain free fatty acids (By similarity).	L-kynurenine + 2-oxoglutarate = 4-(2-aminophenyl)-2,4-dioxobutanoate + L-glutamate.	GO:0006103 cellular processGO:0006532 cellular processGO:0006533 cellular processGO:0006531 cellular processGO:0006520 cellular processGO:0043648 cellular processGO:0015908 localizationGO:0007565 interaction with cells and organismsGO:0019551 cellular processGO:0019550 cellular processGO:0006536 cellular processGO:0007595 regulationGO:0006107 cellular processGO:0045471 response to stimulusGO:0032…	GO:0009986 (cell surface, cell surface) GO:0005743 (mitochondria, envelope) GO:0005759 (mitochondria, intracellular) GO:0005739 (mitochondria, intracellular) GO:0043209 (other, myelin sheath) GO:0043204 (other, cell body) GO:0005886 (plasma membrane, cell periphery) GO:0032991 (macromolecular complex) GO:0042383 (plasma membrane, cell periphery) GO:0030315 (plasma membrane, cell periphery)	GO:0016597 (binding, ion binding) GO:0031406 (binding, ion binding) GO:0019899 (binding, protein binding) GO:0016212 (catalytic activity, transferase activity) GO:0004069 (catalytic activity, transferase activity) GO:0047801 (catalytic activity, transferase activity) GO:0005543 (binding, ion binding) GO:0042803 (binding, protein binding) GO:0030170 (binding, cofactor binding)
87	A0A0G2JZY6	1	Sptbn1	Spectrin beta chain OS=Rattus norvegicus GN=Sptbn1 PE=1 SV=1;Spectrin beta chain OS=Rattus norvegicus GN=Sptbn1 PE=1 SV=1;Spectrin beta chain OS=Rattus norvegicus GN=Sptbn1 PE=1 SV=3;Spectrin beta chain OS=Rattus norvegicus GN=Sptbn1 PE=2 SV=1	5.875	2.625	3	AQTLPTSVVTITSESSPGK+DDDEMNTWIQAITSAISSDK+DLVAIEAK+DMGEMVTQGQTDAQYMFLR+DVEDEILWVGER+EGEDMIAEEHFGSEK+EGMQLISEKPETEAVVK+EIGQSVDEVEK+ELEAESYHDIKR+ENEVLEAWK+EQWANLEQLSAIR+ETWLSENQR+FATDGEGYKPCDPQVIR+FESLEPEMNNQASR+HKDVAEEISNYRPTIDTLHEQAGALPQAHAESPDVK+HQAFMAELASNKEWLDKIEK+INAVVETGR+IVSSNDVGHDEYSTQSLVK+IVSSNDVGHDEYSTQSLVKK+LEMNLGLQK+LISDINKAWER+LLEVLSGER+LLQLTEK+LPEELGRDQNTVETLQR+LTTLELLEVR+LVSQDNFGFDLP…	2310			GO:0051693 regulation	GO:0032991 (macromolecular complex) GO:0008091 (cytoskeleton, cell periphery)	GO:0003779 (binding, protein binding) GO:0005543 (binding, ion binding) GO:0044877 (binding, macromolecular complex binding) GO:0005200 (structural molecule activity, structural constituent of cytoskeleton)
88	Q7TSC1	1	Prrc2a	Protein PRRC2A OS=Mus musculus GN=Prrc2a PE=1 SV=1;MKIAA4178 protein (Fragment) OS=Mus musculus GN=Prrc2a PE=2 SV=1	0.85	2.3	0.8	AVGTPGANAGGAGPGISAMSR+AVGTPGANAGGAGPGISAMSRGDLSQRAK+ENAARGADGKPPSLTLAASTPGPEETLTAATVPPPPR+ETPPAALMTSKAVGTPGANAGGAGPGISAMSR+ETPPAALMTSKAVGTPGANAGGAGPGISAMSRGDLSQR+GADGKPPSLTLAASTPGPEETLTAATVPPPPRRTAAK+GDKETPPAALMTSKAVGTPGANAGGAGPGISAMSR+KGTSPGSELPPPK+QNRRPGTGGKTGSGGGSSGGGGAGPGGR+RPGTGGKTGSGGGSSGGGGAGPGGR+RPGTGGKTGSGGGSSGGGGAGPGGRTGPGR+SLEIQKPAVAPRHGLQSLGKVAIAR+TGSGGGSSGGGGAGPGGRTGPGR	2158	May play a role in the regulation of pre-mRNA splicing.		GO:0030154 cellular process	GO:0005829 (cytoplasm, intracellular) GO:0005654 (nucleus, intracellular) GO:0005886 (plasma membrane, cell periphery)
89	Q05306	0.9919	Col10a1	Collagen alpha-1(X) chain OS=Mus musculus GN=Col10a1 PE=2 SV=1;Collagen type X alpha 1 chain OS=Rattus norvegicus GN=Col10a1 PE=4 SV=1	1.33333	1.93333	1.6	GDIGPAGLPGPR	680	Type X collagen is a product of hypertrophic chondrocytes and has been localized to presumptive mineralization zones of hyaline cartilage.		GO:0051216 developmental processGO:0001958 developmental process	GO:0005938 (cytoplasm, cell periphery) GO:0005581 (macromolecular complex, protein complex) GO:0031012 (extracellular, extracellular matrix) GO:0043235 (macromolecular complex, receptor complex)	GO:0046872 (binding, ion binding)
90	Q00610-2	1	CLTC	Isoform 2 of Clathrin heavy chain 1 OS=Homo sapiens GN=CLTC;Clathrin heavy chain 1 OS=Homo sapiens GN=CLTC PE=1 SV=5;Clathrin heavy chain OS=Homo sapiens GN=CLTC PE=1 SV=1	2.92857	0.571429	2.57143	AFMTADLPNELIELLEK+ENPYYDSR+FQSVPAQPGQTSPLLQYFGILLDQGQLNK+GQFSTDELVAEVEK+ISGETIFVTAPHEATAGIIGVNR+IVLDNSVFSEHR+LAELEEFINGPNNAHIQQVGDR+LECSEELGDLVK+LLYNNVSNFGR+LPVVIGGLLDVDCSEDVIK+LTDQLPLIIVCDR+NNLAGAEELFAR+NNRPSEGPLQTR+RPLIDQVVQTALSETQDPEEVSVTVK+SVDPTLALSVYLR+TLQIFNIEMK+TSIDAYDNFDNISLAQR+VGYTPDWIFLLR+VIQCFAETGQVQK+VVGAMQLYSVDR		Clathrin is the major protein of the polyhedral coat of coated pits and vesicles. Two different adapter protein complexes link the clathrin lattice either to the plasma membrane or to the trans-Golgi network. Acts as component of the TACC3/ch-TOG/clathrin complex proposed to contribute to stabilization of kinetochore fibers of the mitotic spindle by acting as inter-microtubule bridge (PubMed:1585…		GO:0019886 immune system processGO:0006914 cellular processGO:0051301 cellular processGO:0048268 cellular component organization or biogenesisGO:0072583 localizationGO:0006886 localizationGO:0034383 regulationGO:0032802 cellular processGO:0061024 cellular component organization or biogenesisGO:0000278 cellular processGO:1900126 regulationGO:1903077 regulationGO:0001649 cellular processGO:0031623 …	GO:0030118 (macromolecular complex, intracellular) GO:0030132 (plasma membrane, cell periphery) GO:0030130 (other intracellular organelles, endomembrane system) GO:0071439 (macromolecular complex, intracellular) GO:0045334 (endosome, intracellular) GO:0030669 (endosome, intracellular) GO:0030136 (other intracellular organelles, intracellular) GO:0005829 (cytoplasm, intracellular) GO:0036020 (endo…	GO:0032051 (binding, protein binding) GO:0097718 (binding, protein binding) GO:0003725 (binding, heterocyclic compound binding) GO:0050750 (binding, protein binding) GO:0019901 (binding, protein binding) GO:0003723 (binding, heterocyclic compound binding) GO:0005198 (structural molecule activity) GO:1990381 (binding, protein binding)
91	Q62009-2	1	Postn	Isoform 2 of Periostin OS=Mus musculus GN=Postn;Isoform 3 of Periostin OS=Mus musculus GN=Postn;Isoform 4 of Periostin OS=Mus musculus GN=Postn;Isoform 5 of Periostin OS=Mus musculus GN=Postn;Periostin OS=Mus musculus GN=Postn PE=1 SV=2;Periostin isoform M1 OS=Mus musculus GN=Postn PE=2 SV=1;Periostin isoform M2 OS=Mus musculus GN=Postn PE=2 SV=1;Putative uncharacterized protein OS=Mus musculus G…	3.15385	1.38462	2	AAAITSDLLESLGR+DLLTQPGDWTLFAPTNDAFK+DQGPNVCALQQILGTK+EIIQPAEK+GCPAVMPIDHVYGTLGIVGATTTQHYSDVSK+GFEPGVTNILK+IIDGVPVEITEK+KTTVLYECCPGYMR+LLYPADIPVGNDQLLELLNK+QQTTFTDLVAQLGLASSLKPDGEYTLLAPVNNAFSDDTLSMDQR+TTVLYECCPGYMR+VGLSDLYNGQILETIGGK+VKVGLSDLYNGQILETIGGK		Induces cell attachment and spreading and plays a role in cell adhesion (PubMed:10404027). Enhances incorporation of BMP1 in the fibronectin matrix of connective tissues, and subsequent proteolytic activation of lysyl oxidase LOX (PubMed:20181949).		GO:1990523 developmental processGO:0007155 interaction with cells and organismsGO:0044344 cellular processGO:0071560 cellular processGO:0071356 cellular processGO:0071307 cellular processGO:0030198 cellular component organization or biogenesisGO:0001953 interaction with cells and organismsGO:1900025 interaction with cells and organismsGO:1990138 cellular component organization or biogenesisGO:190…	GO:0005737 (cytoplasm, intracellular) GO:0031012 (extracellular, extracellular matrix) GO:0005615 (extracellular, extracellular region part) GO:0031594 (other, neuromuscular junction) GO:0005802 (other intracellular organelles, endomembrane system)	GO:0008201 (binding, carbohydrate derivative binding) GO:0046872 (binding, ion binding)
92	E9Q3L2	0.9999	Pi4ka	Phosphatidylinositol 4-kinase alpha OS=Mus musculus GN=Pi4ka PE=1 SV=2;Uncharacterized protein OS=Mus musculus GN=Pi4ka PE=2 SV=1	1.08696	1.17391	0.73913	AAAGARGGGGGGGGGGGGGSGSSSGSSTSR+AAAGARGGGGGGGGGGGGGSGSSSGSSTSRGFYFNTVLSLAR+GGGGGGGGGGGGGSGSSSGSSTSR+LLTLGLSLLHADVVPNATIR+MAAAGARGGGGGGGGGGGGGSGSSSGSSTSR+MAAAGARGGGGGGGGGGGGGSGSSSGSSTSRGFYFNTVLSLAR+YAGEVHGMIR	2105	Acts on phosphatidylinositol (PtdIns) in the first committed step in the production of the second messenger inositol-1,4,5,-trisphosphate.	ATP + 1-phosphatidyl-1D-myo-inositol = ADP + 1-phosphatidyl-1D-myo-inositol 4-phosphate.	GO:0030036 cellular component organization or biogenesisGO:0044803 cellular component organization or biogenesisGO:0046854 cellular processGO:0048015 regulationGO:0016310 cellular processGO:0046786 cellular processGO:0039694 cellular process	GO:0005737 (cytoplasm, intracellular) GO:0030660 (other intracellular organelles, endomembrane system) GO:0005886 (plasma membrane, cell periphery) GO:0019034 (nucleus, host)	GO:0004430 (catalytic activity, transferase activity) GO:0005524 (binding, carbohydrate derivative binding) GO:0016301 (catalytic activity, transferase activity)
93	P01946	1	Hba1	Hemoglobin subunit alpha-1/2 OS=Rattus norvegicus GN=Hba1 PE=1 SV=3;Globin c2 OS=Rattus norvegicus GN=Hba-a2 PE=1 SV=1;Globin c3 OS=Rattus norvegicus GN=Hba-a1 PE=2 SV=1	1.69231	2.07692	1.92308	AADHVEDLPGALSTLSDLHAHK+AADHVEDLPGALSTLSDLHAHKLR+DHVEDLPGALSTLSDLHAHK+FLASVSTVLTSK+FLSHCLLVTLACHHPGDFTPAMHASLDK+FLSHCLLVTLACHHPGDFTPAMHASLDKFLASVSTVLTSK+GGEYGEEALQR+MFAAFPTTK+TYFSHIDVSPGSAQVK	142	Involved in oxygen transport from the lung to the various peripheral tissues.		GO:0045776 regulationGO:0051930 regulation	GO:0005833 (macromolecular complex, intracellular) GO:0045202 (other)	GO:0001540 (binding, amide binding) GO:0020037 (binding, heterocyclic compound binding) GO:0005506 (binding, ion binding) GO:0019825 (binding, oxygen binding) GO:0005344 (transporter, substrate-specific transporter activity)
94	F6USE9	1	ALDH2	Uncharacterized protein OS=Macaca mulatta GN=ALDH2 PE=3 SV=1;Uncharacterized protein OS=Macaca mulatta GN=ALDH2 PE=3 SV=1;Uncharacterized protein OS=Macaca mulatta GN=ALDH2 PE=3 SV=1;Uncharacterized protein OS=Macaca mulatta GN=EGK_04197 PE=3 SV=1;Putative uncharacterized protein OS=Macaca fascicularis GN=EGM_03768 PE=3 SV=1;Aldehyde dehydrogenase, mitochondrial isoform 1 (Fragment) OS=Macaca mul…	4.5	1.4	3.1	EAGFPPGVVNIVPGFGPTAGAAIASHEDVDK+EEIFGPVMQILK+ELGEYGLQAYTEVK+GYFIQPTVFGDVQ+LGPALATGNVVVMK+TEQGPQVDETQFK+TFPTVNPSTGEVICQVAEGDK+TFPTVNPSTGEVICQVAEGDKEDVDK+TIPIDGDFFSYTR+VAEQTPLTALYVANLIK
95	Q61941	1	Nnt	NAD(P) transhydrogenase, mitochondrial OS=Mus musculus GN=Nnt PE=1 SV=2;Putative uncharacterized protein OS=Mus musculus GN=Nnt PE=2 SV=1;Nicotinamide nucleotide transhydrogenase OS=Rattus norvegicus GN=Nnt PE=1 SV=1;Nicotinamide nucleotide transhydrogenase, isoform CRA_a OS=Mus musculus GN=Nnt PE=2 SV=1;Nicotinamide nucleotide transhydrogenase OS=Mus musculus GN=Nnt PE=2 SV=1	1.21739	0.869565	1.30435	AAALEQFK+AQYPIADLVK+DDFDFGTMSHVIR+EANSIVITPGYGLCAAK+EVDILISTALIPGKK+EVLASDLVVK+FFTGQITAAGK+FGIHPVAGR+FPDDLYR+KTTVLAMDQVPR+MATQASTLYSNNITK+MLTEQGK+QGFNVVVESGAGEASK+QLTVGVPK+RVALSPAGVQALVK+SAPLLLPGR+SLGAEPLEVDLK+TTVLAMDQVPR+TVAELEAEK+VALSPAGVQALVK+VTIAQGYDALSSMANISGYK	1086	The transhydrogenation between NADH and NADP is coupled to respiration and ATP hydrolysis and functions as a proton pump across the membrane. May play a role in reactive oxygen species (ROS) detoxification in the adrenal gland (By similarity).	NADPH + NAD(+) = NADP(+) + NADH.	GO:0006740 cellular processGO:1902600 localizationGO:0072593 cellular process	GO:0016021 (other, membrane part) GO:0005743 (mitochondria, envelope) GO:0005739 (mitochondria, intracellular)	GO:0051287 (binding, cofactor binding) GO:0008750 (catalytic activity, oxidoreductase activity) GO:0050661 (binding, cofactor binding)
96	Q63716	1	Prdx1	Peroxiredoxin-1 OS=Rattus norvegicus GN=Prdx1 PE=1 SV=1;Uncharacterized protein OS=Rattus norvegicus PE=4 SV=1	2.25	1	1.9375	ATAVMPDGQFK+DISLSDYK+GLFIIDDK+HGEVCPAGWKPGSDTIKPDVNK+KQGGLGPMNIPLVSDPK+KQGGLGPMNIPLVSDPKR+LVQAFQFTDK+QGGLGPMNIPLVSDPK+QITINDLPVGR+QITLNDLPVGR+TIAQDYGVLK	199	Thiol-specific peroxidase that catalyzes the reduction of hydrogen peroxide and organic hydroperoxides to water and alcohols, respectively. Plays a role in cell protection against oxidative stress by detoxifying peroxides and as sensor of hydrogen peroxide-mediated signaling events. Might participate in the signaling cascades of growth factors and tumor necrosis factor-alpha by regulating the int…	2 R'-SH + ROOH = R'-S-S-R' + H(2)O + ROH.	GO:0045454 regulationGO:0006979 response to stimulus	GO:0005737 (cytoplasm, intracellular) GO:0005829 (cytoplasm, intracellular) GO:0005759 (mitochondria, intracellular) GO:0005719 (chromosome, intracellular) GO:0005730 (nucleus, intracellular) GO:0005782 (peroxisome/microbody, intracellular)	GO:0020037 (binding, heterocyclic compound binding) GO:0004601 (antioxidant activity, peroxidase activity) GO:0051920 (antioxidant activity, peroxiredoxin activity) GO:0042803 (binding, protein binding)
97	P12111-2	1	COL6A3	Isoform 2 of Collagen alpha-3(VI) chain OS=Homo sapiens GN=COL6A3;Isoform 4 of Collagen alpha-3(VI) chain OS=Homo sapiens GN=COL6A3;Collagen alpha-3(VI) chain OS=Homo sapiens GN=COL6A3 PE=1 SV=5;COL6A3 protein OS=Homo sapiens GN=COL6A3 PE=2 SV=1;Collagen, type VI, alpha 3 OS=Homo sapiens GN=COL6A3 PE=4 SV=1;Collagen alpha-3(VI) chain OS=Homo sapiens GN=COL6A3 PE=1 SV=2	11.75	5	7.5	GEPGLNGTTGPKGIR+GFPGEKGEVGEIGLDGLDGEDGDKGLP+GLDGEDGDKGLPGSSGEKGNPGR+GPKGETGDLGPMGVPGRDGVPGGP+IASNSATAFR+ISLSPEYVFSVSTFR+KALEFVARNLFVK+LLTPITTLTSEQIQKLLASTR+LNLLDLDYELAEQLDNIAEK+NADPAELEQIVLSPAFILAAESLPK+SNDVFPEFYLK+SPAFILAAESLPK+VAVVTYNNEVTTEIR+VPQIAFVITGGK		Collagen VI acts as a cell-binding protein.		GO:0007155 interaction with cells and organismsGO:0030198 cellular component organization or biogenesisGO:0007517 developmental process	GO:0005589 (macromolecular complex, protein complex) GO:0005788 (er, endomembrane system) GO:0070062 (extracellular, extracellular exosome) GO:0031012 (extracellular, extracellular matrix) GO:0005576 (extracellular) GO:0005615 (extracellular, extracellular region part) GO:1903561 (extracellular, extracellular organelle) GO:0042383 (plasma membrane, cell periphery)	GO:0030020 (structural molecule activity, extracellular matrix structural constituent) GO:0004867 (molecular function regulator, enzyme regulator activity)
98	P07687	1	Ephx1	Epoxide hydrolase 1 OS=Rattus norvegicus GN=Ephx1 PE=1 SV=1	5.5	2.625	2.375	ASPPLEGSR+DIELLYPYK+ESGYLHIQATKPDTVGCALNDSPVGLAAYILEK+FVSLAELQ+FYIQGGDWGSLICTNMAQMVPNHVK+IEGLDIHFIHVKPPQLPSGR+IIPLLTDPK+LISYSYMER+LLAQDIR+QVEILNQYPHFK+SFYTMTPLLGQR+VFVPTGFSAFPSELLHAPEK+VFYSIMR	455	Biotransformation enzyme that catalyzes the hydrolysis of arene and aliphatic epoxides to less reactive and more water soluble dihydrodiols by the trans addition of water. May play a role in the metabolism of endogenous lipids such as epoxide-containing fatty acids.	1-(4-methoxyphenyl)-N-methyl-N-((3-methyloxetan-3-yl)methyl)methanamine + H(2)O = 2-((((4-methoxyphenyl)methyl)(methyl)amino)methyl)-2-methylpropane-1,3-diol.	GO:0019439 cellular processGO:0071385 cellular processGO:0071310 cellular processGO:0034312 metabolic processGO:0097176 cellular processGO:0001889 developmental processGO:0009636 response to stimulus	GO:0005789 (er, endomembrane system) GO:0016021 (other, membrane part) GO:0043231 (other intracellular organelles, intracellular) GO:0016020 (other) GO:0031090 (other, organelle membrane) GO:0005886 (plasma membrane, cell periphery)	GO:0033961 (catalytic activity, hydrolase activity) GO:0019899 (binding, protein binding) GO:0004301 (catalytic activity, hydrolase activity)
99	P24368	1	Ppib	Peptidyl-prolyl cis-trans isomerase B OS=Rattus norvegicus GN=Ppib PE=1 SV=3	1.52941	1.05882	1.29412	DFMIQGGDFTR+DTNGSQFFITTVK+HYGPGWVSMANAGK+TVDNFVALATGEK+VLEGMDVVR+VTFGLFGK+VYFDFQIGDEPVGR		PPIase that catalyzes the cis-trans isomerization of proline imidic peptide bonds in oligopeptides and may therefore assist protein folding.	Peptidylproline (omega=180) = peptidylproline (omega=0).	GO:0060348 developmental processGO:0061077 cellular processGO:0051169 localizationGO:0044829 regulationGO:0040018 regulationGO:0000413 cellular processGO:0050821 regulation	GO:0034663 (er, endomembrane system) GO:0005788 (er, endomembrane system) GO:0042470 (other intracellular organelles, intracellular) GO:0005634 (nucleus, intracellular) GO:0048471 (nucleus, intracellular) GO:0032991 (macromolecular complex) GO:0005790 (er, endomembrane system)	GO:0016018 (binding, amide binding) GO:0003755 (catalytic activity, isomerase activity) GO:0044877 (binding, macromolecular complex binding) GO:0070063 (binding, protein binding)
100	P11598	1	Pdia3	Protein disulfide-isomerase A3 OS=Rattus norvegicus GN=Pdia3 PE=1 SV=2;Protein disulfide-isomerase OS=Rattus norvegicus GN=Pdia3 PE=1 SV=1	3.06667	0.933333	1.13333	DLLTAYYDVDYEK+ELNDFISYLQR+FAHTNVESLVK+FLQEYFDGNLK+FVMQEEFSR+GFPTIYFSPANK+IFRDGEEAGAYDGPR+LAPEYEAAATR+LNFAVASR+MDATANDVPSPYEVK+SDVLELTDENFESR+TFSHELSDFGLESTTGEIPVVAIR+VVVAESFDDIVNAEDK+YGVSGYPTLK	505		Catalyzes the rearrangement of -S-S- bonds in proteins.	GO:0045454 regulationGO:1904148 cellular processGO:0071560 cellular processGO:0071305 cellular processGO:0007623 otherGO:1903334 regulationGO:1901423 response to stimulusGO:0034976 cellular processGO:0045471 response to stimulusGO:0033595 response to stimulusGO:0055093 response to stimulusGO:0001666 response to stimulusGO:0002931 response to stimulusGO:0044321 response to stimulusGO:0031667 respo…	GO:0001669 (other intracellular organelles, endomembrane system) GO:0016324 (plasma membrane, apical part of cell) GO:0009986 (cell surface, cell surface) GO:0005737 (cytoplasm, intracellular) GO:0005783 (er, endomembrane system) GO:0005788 (er, endomembrane system) GO:0005576 (extracellular) GO:0005615 (extracellular, extracellular region part) GO:0042470 (other intracellular organelles, intrace…	GO:0042288 (binding, protein binding) GO:0008233 (catalytic activity, hydrolase activity) GO:0003756 (catalytic activity, isomerase activity) GO:0019153 (catalytic activity, oxidoreductase activity)
101	P0DMW0	1	Hspa1a	Heat shock 70 kDa protein 1A OS=Rattus norvegicus GN=Hspa1a PE=2 SV=1;Heat shock 70 kDa protein 1B OS=Rattus norvegicus GN=Hspa1b PE=2 SV=1	2.09091	0.5	0.818182	AQIHDLVLVGGSTR+DAGVIAGLNVLR+EIAEAYLGHPVTNAVITVPAYFNDSQR+FEELCSDLFR+FGDPVVQSDMK+GGSGSGPTIEEVD+IINEPTAAAIAYGLDR+NAVITVPAYFNDSQR+QTQTFTTYSDNQPGVLIQVYEGER+SFYPEEISSMVLTK+SINPDEAVAYGAAVQAAILMGDK+TTPSYVAFTDTER+VEIIANDQGNR	641	Molecular chaperone implicated in a wide variety of cellular processes, including protection of the proteome from stress, folding and transport of newly synthesized polypeptides, activation of proteolysis of misfolded proteins and the formation and dissociation of protein complexes. Plays a pivotal role in the protein quality control system, ensuring the correct folding of proteins, the re-foldin…		GO:0006402 cellular processGO:0060548 regulationGO:0030308 regulationGO:0008285 regulationGO:0097201 regulationGO:0030182 cellular processGO:0090063 regulationGO:0045666 regulationGO:0042026 cellular processGO:1901673 regulationGO:0045471 response to stimulusGO:0002931 response to stimulusGO:0009612 response to stimulusGO:0009314 response to stimulusGO:0006986 response to stimulus	GO:0005813 (cytoskeleton, intracellular) GO:0005737 (cytoplasm, intracellular) GO:0045121 (other, membrane part) GO:0016607 (nucleus, intracellular) GO:0005634 (nucleus, intracellular) GO:0048471 (nucleus, intracellular)	GO:0005524 (binding, carbohydrate derivative binding) GO:0003714 (transcription factor activity, protein binding, transcription factor activity, transcription factor binding)
102	P62701	1	RPS4X	40S ribosomal protein S4, X isoform OS=Homo sapiens GN=RPS4X PE=1 SV=2;40S ribosomal protein S4 OS=Homo sapiens GN=RPS4X PE=2 SV=1;Ribosomal protein S4, X-linked X isoform variant (Fragment) OS=Homo sapiens PE=2 SV=1;RPS4X protein (Fragment) OS=Homo sapiens GN=RPS4X PE=2 SV=2	4.18182	2.36364	1.54545	ECLPLIIFLR+FDTGNLCMVTGGANLGR+LSNIFVIGK+TDITYPAGFMDVISIDK+VNDTIQIDLETGK	263			GO:0007275 developmental processGO:0000184 cellular processGO:0008284 regulationGO:0045727 regulationGO:0045471 response to stimulusGO:0006614 localizationGO:0006412 cellular processGO:0006413 cellular process	GO:0036464 (nucleus, intracellular) GO:0005829 (cytoplasm, intracellular) GO:0022627 (ribosome, intracellular) GO:0070062 (extracellular, extracellular exosome) GO:0005925 (other, anchoring junction) GO:0016020 (other) GO:0005654 (nucleus, intracellular) GO:0005844 (nucleus, intracellular) GO:1990904 (nucleus, ribonucleoprotein complex) GO:0005840 (ribosome, intracellular) GO:0015935 (ribosome, i…	GO:0003723 (binding, heterocyclic compound binding) GO:0019843 (binding, heterocyclic compound binding) GO:0003735 (structural molecule activity, structural constituent of ribosome)
103	A2CE44	0.9893	Zxdb	Zinc finger X-linked protein ZXDB OS=Mus musculus GN=Zxdb PE=1 SV=1	1	2.4	1.26667	CLSAVPAASPLPAAGPGPAAAAAAAAAAAFAGTITIHNQDLLLR+GGGAGGGGGGSGGGGGGGGGGGGGGGGGGSR+GGGAGGGGGGSGGGGGGGGGGGGGGGGGGSRGGSDDFFLLLLDPVGGDVETVGTEQAGAPVR+GTPQGAGGGGCPAGGGGVHRAPASLACQAPTR+SSGGGRGGGAGGGGGGSGGGGGGGGGGGGGGGGGGSR
104	Q6PAR0-2	0.8753	Klhdc10	Isoform 2 of Kelch domain-containing protein 10 OS=Mus musculus GN=Klhdc10;Kelch domain-containing protein 10 OS=Mus musculus GN=Klhdc10 PE=1 SV=1	0.647059	0.823529	0.235294	RGGGAAGGASGVSGAGAAGGGR+RRGGGAAGGASGVSGAGAAGGGR		Participates in the oxidative stress-induced cell death through MAP3K5 activation. Inhibits PPP5C phosphatase activity on MAP3K5.			GO:0005737 (cytoplasm, intracellular) GO:0005654 (nucleus, intracellular)
105	Q80U70	0.9999	Suz12	Polycomb protein Suz12 OS=Mus musculus GN=Suz12 PE=1 SV=2;Polycomb protein Suz12 OS=Mus musculus GN=Suz12 PE=1 SV=1	0.393939	1	0.666667	APQKHGGGGGGGSGPSAGSGGGGFGGSAAAVAAAASGGK+HGGGGGGGSGPSAGSGGGGFGGSAAAVAAAASGGK+MAPQKHGGGGGGGSGPSAGSGGGGFGGSAAAVAAAASGGK+RLQLLDGEYEVAMQEMEECPISKK+SGGGGCGGGGSYSASSSSAAAAAAAAGAAVLPVK		Polycomb group (PcG) protein. Component of the PRC2/EED-EZH2 complex, which methylates 'Lys-9' (H3K9me) and 'Lys-27' (H3K27me) of histone H3, leading to transcriptional repression of the affected target gene. The PRC2/EED-EZH2 complex may also serve as a recruiting platform for DNA methyltransferases, thereby linking two epigenetic repression systems (By similarity). Genes repressed by the PRC2/E…		GO:0098532 cellular component organization or biogenesisGO:0016571 cellular component organization or biogenesisGO:0016574 cellular component organization or biogenesisGO:0045596 regulationGO:0032682 regulationGO:0050680 regulationGO:0000122 regulationGO:0042532 regulationGO:0008284 regulationGO:0006351 cellular process	GO:0035098 (nucleus, intracellular) GO:0016604 (nucleus, intracellular) GO:0005730 (nucleus, intracellular) GO:0005654 (nucleus, intracellular) GO:0005634 (nucleus, intracellular) GO:0032993 (macromolecular complex, protein-DNA complex) GO:0016586 (nucleus, intracellular) GO:0001739 (chromosome, intracellular)	GO:0003682 (binding, chromatin binding) GO:0031490 (binding, chromatin binding) GO:0042054 (catalytic activity, transferase activity) GO:0046976 (catalytic activity, transferase activity) GO:0046872 (binding, ion binding) GO:0035064 (binding, protein binding) GO:1990841 (binding, chromatin binding) GO:0003723 (binding, heterocyclic compound binding) GO:0000978 (binding, heterocyclic compound bind…
106	P06685	1	Atp1a1	Sodium/potassium-transporting ATPase subunit alpha-1 OS=Rattus norvegicus GN=Atp1a1 PE=1 SV=1;Sodium/potassium-transporting ATPase subunit alpha-1 OS=Mus musculus GN=Atp1a1 PE=1 SV=1;Sodium/potassium-transporting ATPase subunit alpha OS=Cricetulus griseus GN=H671_1g1941 PE=3 SV=1;Sodium/potassium-transporting ATPase subunit alpha OS=Cricetulus griseus GN=H671_1g1941 PE=3 SV=1;Sodium/potassium-tra…	1.31034	0.482759	0.655172	ADIGVAMGIVGSDVSK+AVFQANQENLPILK+CSSILLHGK+DMTSEELDDILR+EVSMDDHK+GVGIISEGNETVEDIAAR+IVEIPFNSTNK+LNIPVNQVNPR+MSINAEDVVVGDLVEVK+NMVPQQALVIR+QAADMILLDDNFASIVTGVEEGR+QGAIVAVTGDGVNDSPALK+SPDFTNENPLETR+TGDHPITAK+VDNSSLTGESEPQTR+VIMVTGDHPITAK+YGTDLSR+YQLSIHK	1023	This is the catalytic component of the active enzyme, which catalyzes the hydrolysis of ATP coupled with the exchange of sodium and potassium ions across the plasma membrane. This action creates the electrochemical gradient of sodium and potassium ions, providing the energy for active transport of various nutrients.	ATP + H(2)O + Na(+)(In) + K(+)(Out) = ADP + phosphate + Na(+)(Out) + K(+)(In).	GO:0090662 localizationGO:0060048 interaction with cells and organismsGO:0030007 regulationGO:0071260 cellular processGO:0071383 cellular processGO:0006883 regulationGO:0015988 localizationGO:0010248 localizationGO:0060081 regulationGO:0086009 regulationGO:0031947 regulationGO:0045822 regulationGO:0045823 regulationGO:0045989 regulationGO:0010107 cellular processGO:1990573 cellular processGO:0006…	GO:0016324 (plasma membrane, apical part of cell) GO:0016323 (plasma membrane, cell periphery) GO:0005901 (plasma membrane, cell periphery) GO:0005783 (er, endomembrane system) GO:0005768 (endosome, endomembrane system) GO:0005794 (other intracellular organelles, endomembrane system) GO:0016021 (other, membrane part) GO:0014704 (other, cell-cell junction) GO:0016020 (other) GO:0045121 (other, mem…	GO:0043531 (binding, carbohydrate derivative binding) GO:0030506 (binding, protein binding) GO:0005524 (binding, carbohydrate derivative binding) GO:0051087 (binding, protein binding) GO:0016791 (catalytic activity, hydrolase activity) GO:0043548 (binding, protein binding) GO:0030955 (binding, ion binding) GO:0019904 (binding, protein binding) GO:0019901 (binding, protein binding) GO:0031402 (bin…
107	P21796	1	VDAC1	Voltage-dependent anion-selective channel protein 1 OS=Homo sapiens GN=VDAC1 PE=1 SV=2	2.85714	1.28571	1.5	EHINLGCDMDFDIAGPSIR+LTFDSSFSPNTGK+LTLSALLDGK+TDEFQLHTNVNDGTEFGGSIYQK+VNNSSLIGLGYTQTLKPGIK+VTQSNFAVGYK+WNTDNTLGTEITVEDQLAR+WTEYGLTFTEK	283	Forms a channel through the mitochondrial outer membrane and also the plasma membrane. The channel at the outer mitochondrial membrane allows diffusion of small hydrophilic molecules; in the plasma membrane it is involved in cell volume regulation and apoptosis. It adopts an open conformation at low or zero membrane potential and a closed conformation at potentials above 30-40 mV. The open state …		GO:0006820 localizationGO:0006915 cellular processGO:0001662 behaviorGO:0030855 cellular processGO:0007612 behaviorGO:0016236 cellular processGO:0006851 localizationGO:2000378 regulationGO:0007270 cellular processGO:0006090 cellular processGO:1903146 regulationGO:0016032 cellular process	GO:0070062 (extracellular, extracellular exosome) GO:0016020 (other) GO:0045121 (other, membrane part) GO:0042645 (mitochondria, intracellular) GO:0005741 (mitochondria, envelope) GO:0005757 (mitochondria, envelope) GO:0005739 (mitochondria, intracellular) GO:0043209 (other, myelin sheath) GO:0005634 (nucleus, intracellular) GO:0005886 (plasma membrane, cell periphery) GO:0046930 (macromolecular …	GO:0042802 (binding, protein binding) GO:0044325 (binding, protein binding) GO:0015288 (transporter, transmembrane transporter activity) GO:0019901 (binding, protein binding) GO:0044877 (binding, macromolecular complex binding) GO:0008308 (transporter, substrate-specific transporter activity)
108	A0A0G2JUA5	1	Ahnak	AHNAK nucleoprotein OS=Rattus norvegicus GN=Ahnak PE=1 SV=1	2.78947	0.578947	0.842105	AEGPEVDVSLPK+ELLLPNWQGSGSHGLTIAQR+FGVSAGLEGQIPEGGLNVSAPEFSVGHK+GFGVDTETPNLEGTLTGPK+GGIQVPGVDVSSSLGGGSVEGQGPSLQSGDIGK+GGQIGLQGPGLSVSGPQGHLESGSGK+GPGVDLPSVDLSLPK+GPQISAPGMDFNLEGPK+GPQVCGELQGSGTDVNLK+GPQVSSSVNLDTTK+GPSFNMASPESDFGVSLK+GPSIGGGLPGISIQGPEGNLQMPGIK+GPSVDVDVPDVDLECPEAK+IEGSITGPCVEIGTPDVDVHGLGGK+ISMADVDLNVAAPK+ISMPDFDLNLK+ISMPDIDLNLK+ISMPDVDFNLK+ISMPDVDLNIK+ISMPNIDLNLK+ISMQDVDLSLGSCK+MDIDV…	5450			GO:0051259 cellular component organization or biogenesisGO:0043484 regulationGO:1901385 regulation	GO:0015629 (cytoskeleton, intracellular) GO:0044291 (other, cell-cell junction) GO:0043034 (other intracellular organelles, intracellular) GO:0005737 (cytoplasm, intracellular) GO:0005829 (cytoplasm, intracellular) GO:0070062 (extracellular, extracellular exosome) GO:0045121 (other, membrane part) GO:0005634 (nucleus, intracellular) GO:0005886 (plasma membrane, cell periphery) GO:0042383 (plasma …	GO:0044548 (binding, protein binding) GO:0097493 (structural molecule activity, structural molecule activity conferring elasticity)
109	A3KMH1-2	0.9772	VWA8	Isoform 2 of von Willebrand factor A domain-containing protein 8 OS=Homo sapiens GN=VWA8;von Willebrand factor A domain-containing protein 8 OS=Homo sapiens GN=VWA8 PE=1 SV=2	4.18182	3.09091	0.818182	MQSRLLLLGAPGGHGGPASR		Exhibits ATPase activity in vitro.			GO:0005739 (mitochondria, intracellular)	GO:0005524 (binding, carbohydrate derivative binding) GO:0016887 (catalytic activity, hydrolase activity)
110	F1LNH3	1	Col6a2	Collagen type VI alpha 2 chain OS=Rattus norvegicus GN=Col6a2 PE=1 SV=2	7.875	1.875	1.625	DFDSLAQPSFFDR+DIANTPHELYR+FAYNQLIK+FIDDMEDVLCPDPQIVCPELPCQTELYVAQCTQR+KQNVVPTVVAVGGDVDMDVLTK+LFAVAPNR+NFVINVVNR+NLEWIAGGTWTPSALK+NNYATMRPDSTEIDQDTINR+QNVVPTVVAVGGDVDMDVLTK+QQQEAISPDISTTDR+VGVVQYSHEGTFEAIR	1027			GO:0070208 cellular component organization or biogenesisGO:0009749 response to stimulus	GO:0005581 (macromolecular complex, protein complex) GO:0031012 (extracellular, extracellular matrix) GO:0005576 (extracellular) GO:0042383 (plasma membrane, cell periphery)
111	P10853	1	Hist1h2bf	Histone H2B type 1-F/J/L OS=Mus musculus GN=Hist1h2bf PE=1 SV=2;Histone H2B type 1-M OS=Mus musculus GN=Hist1h2bm PE=1 SV=2;Histone H2B type 1 OS=Rattus norvegicus PE=1 SV=2;Histone H2B type 1-B OS=Mus musculus GN=Hist1h2bb PE=1 SV=3;Histone H2B type 1-H OS=Mus musculus GN=Hist1h2bh PE=1 SV=3;Histone H2B type 2-B OS=Mus musculus GN=Hist2h2bb PE=1 SV=3;Histone H2B type 1-C/E/G OS=Mus musculus GN=H…	0.470588	2.05882	1.76471	AMGIMNSFVNDIFER+ESYSVYVYK+HAVSEGTK+KAMGIMNSFVNDIFER+KESYSVYVYK+LLLPGELAK+QVHPDTGISSK	126	Core component of nucleosome. Nucleosomes wrap and compact DNA into chromatin, limiting DNA accessibility to the cellular machineries which require DNA as a template. Histones thereby play a central role in transcription regulation, DNA repair, DNA replication and chromosomal stability. DNA accessibility is regulated via a complex set of post-translational modifications of histones, also called h…		GO:0019731 immune system processGO:0061844 immune system processGO:0050830 response to stimulusGO:0002227 immune system processGO:0006334 cellular component organization or biogenesis	GO:0005829 (cytoplasm, intracellular) GO:0005615 (extracellular, extracellular region part) GO:0005654 (nucleus, intracellular) GO:0000786 (chromosome, intracellular) GO:0005634 (nucleus, intracellular)	GO:0003677 (binding, heterocyclic compound binding) GO:0042802 (binding, protein binding) GO:0046982 (binding, protein binding)
112	A0A061IP52	1	H671_1g3064	Histone H2B OS=Cricetulus griseus GN=H671_1g3064 PE=3 SV=1;Histone H2B OS=Mesocricetus auratus GN=LOC101827298 PE=3 SV=1;Histone H2B OS=Mesocricetus auratus GN=LOC101830217 PE=3 SV=1;Histone H2B OS=Mesocricetus auratus GN=LOC101839356 PE=3 SV=1;Histone H2B OS=Mesocricetus auratus GN=LOC101843803 PE=3 SV=1;Histone H2B OS=Mesocricetus auratus GN=LOC101843256 PE=3 SV=1;Histone H2B OS=Cricetulus gris…	0.103448	0.896552	1.44828	AMGIMNSFVNDIFER+ESYSVYVYK+HAVSEGTK+KAMGIMNSFVNDIFER+KESYSVYVYK+LLLPGELAK+QVHPDTGISSK	136				GO:0000786 (chromosome, intracellular) GO:0005634 (nucleus, intracellular)	GO:0003677 (binding, heterocyclic compound binding) GO:0046982 (binding, protein binding)
113	O60814	1	HIST1H2BK	Histone H2B type 1-K OS=Homo sapiens GN=HIST1H2BK PE=1 SV=3;Histone H2B type 1-F/J/L OS=Mus musculus GN=Hist1h2bf PE=1 SV=2;Histone H2B type 1-M OS=Mus musculus GN=Hist1h2bm PE=1 SV=2;Histone H2B type 1-D OS=Homo sapiens GN=HIST1H2BD PE=1 SV=2;Histone H2B type 1-C/E/F/G/I OS=Homo sapiens GN=HIST1H2BC PE=1 SV=4;Histone H2B type 1-B OS=Mus musculus GN=Hist1h2bb PE=1 SV=3;Histone H2B type 1-H OS=Mus…	0.103448	0.896552	1.44828	AMGIMNSFVNDIFER+ESYSVYVYK+HAVSEGTK+KAMGIMNSFVNDIFER+KESYSVYVYK+LLLPGELAK+QVHPDTGISSK	126	Has broad antibacterial activity. May contribute to the formation of the functional antimicrobial barrier of the colonic epithelium, and to the bactericidal activity of amniotic fluid.		GO:0019731 immune system processGO:0061844 immune system processGO:0050829 response to stimulusGO:0050830 response to stimulusGO:0002227 immune system processGO:0031640 regulationGO:0006334 cellular component organization or biogenesisGO:0016567 cellular process	GO:0005829 (cytoplasm, intracellular) GO:0005615 (extracellular, extracellular region part) GO:0005654 (nucleus, intracellular) GO:0000786 (chromosome, intracellular) GO:0005634 (nucleus, intracellular)	GO:0003677 (binding, heterocyclic compound binding) GO:0046982 (binding, protein binding)
114	Q64428	1	Hadha	Trifunctional enzyme subunit alpha, mitochondrial OS=Rattus norvegicus GN=Hadha PE=1 SV=2	2.33333	1.8	1.6	ADMVIEAVFEDLAVK+CLAPMMSEVIR+DGPGFYTTR+DSIFSNLIGQLDYK+DTTASAVAVGLK+DTTVTGLGR+EVESVTPEHCIFASNTSALPINQIAAVSQRPEK+EVQSEFVEVMNEIWANDQIR+FGELALTK+ILQEGVDPK+KTVLGVPEVLLGILPGAGGTQR+LPAKPEVSSDEDIQYR+MGLVDQLVDPLGPGIK+MQLLEIITTDK+MVGVPAAFDMMLTGR+NLNSEIDNILVNLR+TGLEQGNDAGYLAESEK+THINYGVK+TIEYLEEVAVNFAK+TVLGVPEVLLGILPGAGGTQR+TVQQLAILGAGLMGAGIAQVSVDK		Bifunctional subunit.	A long-chain (S)-3-hydroxyacyl-CoA + NAD(+) = a long-chain 3-oxoacyl-CoA + NADH.	GO:0006635 cellular processGO:0042493 response to stimulusGO:0032868 response to stimulus	GO:0016507 (mitochondria, intracellular) GO:0042645 (mitochondria, intracellular) GO:0005739 (mitochondria, intracellular)	GO:0003857 (catalytic activity, oxidoreductase activity) GO:0003988 (catalytic activity, transferase activity) GO:0004300 (catalytic activity, lyase activity) GO:0000062 (binding, cofactor binding) GO:0016509 (catalytic activity, oxidoreductase activity) GO:0016508 (catalytic activity, lyase activity) GO:0051287 (binding, cofactor binding) GO:0044877 (binding, macromolecular complex binding)
115	P11276	1	Fn1	Fibronectin OS=Mus musculus GN=Fn1 PE=1 SV=4;Fibronectin OS=Mus musculus GN=Fn1 PE=1 SV=1;Fibronectin OS=Mus musculus GN=Fn1 PE=1 SV=1;Putative uncharacterized protein OS=Mus musculus GN=Fn1 PE=2 SV=1;Putative uncharacterized protein OS=Mus musculus GN=Fn1 PE=2 SV=1	0.368421	3	0.894737	APITGYIIR+ATGVFTTLQPLR+CHEGGQSYK+CNDQDTR+EESPPLIGQQATVSDIPR+EINLSPDSSSVIVSGLMVATK+EYLGAICSCTCFGGQR+FTNIGPDTMR+IGDQWDK+IGEKWDR+ITYGETGGNSPVQEFTVPGSK+LSDAGFK+PGTEYLVSVSSVYEQHESIPLR+QDGHLWCSTTSNYEQDQK+SYTITGLQPGTDYK+TDELPQLVTLPHPNLHGPEILDVPSTVQK+TETITGFQVDAIPANGQTPVQR+TKTASPDQTEMTIEGLQPTVEYVVSVYAQNR+TTPDITGYR+TYLGNALVCTCYGGSR+VEYELSEEGDEPQYLDLPSTATSVNIPDLLPGR+VRPSQGGEAPR+VTWAPPPSIELTNLLVR+VVTPLSPPTN…		Anastellin binds fibronectin and induces fibril formation. This fibronectin polymer, named superfibronectin, exhibits enhanced adhesive properties. Both anastellin and superfibronectin inhibit tumor growth, angiogenesis and metastasis. Anastellin activates p38 MAPK and inhibits lysophospholipid signaling (By similarity).		GO:0006953 response to stimulusGO:0001525 developmental processGO:0007161 interaction with cells and organismsGO:0001775 cellular processGO:0007155 interaction with cells and organismsGO:0007160 interaction with cells and organismsGO:0007044 cellular component organization or biogenesisGO:0071347 cellular processGO:0071288 cellular processGO:0035987 cellular processGO:0030198 cellular component o…	GO:0016324 (plasma membrane, apical part of cell) GO:0005604 (extracellular, extracellular matrix) GO:0005793 (er, intracellular) GO:0070062 (extracellular, extracellular exosome) GO:0031012 (extracellular, extracellular matrix) GO:0005615 (extracellular, extracellular region part) GO:0005577 (extracellular, extracellular region part)	GO:0051087 (binding, protein binding) GO:0097718 (binding, protein binding) GO:0019899 (binding, protein binding) GO:0008201 (binding, carbohydrate derivative binding) GO:0042802 (binding, protein binding) GO:0005178 (binding, macromolecular complex binding) GO:0045340 (binding, ion binding) GO:0016504 (molecular function regulator, enzyme regulator activity) GO:0002020 (binding, protein binding)…
116	P14046	1	A1i3	Alpha-1-inhibitor 3 OS=Rattus norvegicus GN=A1i3 PE=1 SV=1;Alpha-1-inhibitor III OS=Rattus norvegicus GN=LOC297568 PE=1 SV=1;Alpha-1-inhibitor III OS=Rattus norvegicus GN=Mug1 PE=1 SV=3	0.647059	1.82353	2.41176	DPPPKDPVIETIR+EESSCIHSSCTAER+ESVVFVQTDKPMYKPGQSVK+ISLCHGNPTFSSETK+LTAQPAPSPEDLALSMGTIK+LVDIKGDPIPNEQVLIK+MLSGFIPLKPTVK+QLSFSLSAEPIQGPYK+QQNSYGGFSSTQDTVVALDALSK+QQPAFALK+QSPGPCGSEVATVPETGR+QSPGPCGSEVATVPETGRK+SSGSLLNNAMK+VQTVPLTCNNPK+VTASPQSLCGLR+YMVLVPSQLYTETPEK	1477	Protease inhibitor with a wide spectrum of protein targets, which attaches through its thioester function.			GO:0005615 (extracellular, extracellular region part)	GO:0004867 (molecular function regulator, enzyme regulator activity)
117	G3V8L3	1	Lmna	Lamin A, isoform CRA_b OS=Rattus norvegicus GN=Lmna PE=1 SV=1	1.3125	2	1.375	AQNTWGCGSSLR+IDSLSAQLSQLQK+LADALQELR+MQQQLDEYQELLDIK+NSNLVGAAHEELQQSR+TALINATGEEVAMR+TVLCGTCGQP	665			GO:0071456 cellular processGO:0030951 cellular component organization or biogenesisGO:1903243 regulationGO:2001237 regulationGO:0072201 regulationGO:0090201 regulationGO:0006998 cellular component organization or biogenesisGO:0090343 regulationGO:0010628 regulationGO:0006606 localizationGO:0030334 regulationGO:1900180 regulationGO:0055015 cellular process	GO:0005638 (nucleus, intracellular) GO:0031965 (nucleus, endomembrane system) GO:0005654 (nucleus, intracellular)	GO:0005198 (structural molecule activity)
118	P61979-2	1	Hnrnpk	Isoform 2 of Heterogeneous nuclear ribonucleoprotein K OS=Mus musculus GN=Hnrnpk;Heterogeneous nuclear ribonucleoprotein K OS=Mus musculus GN=Hnrnpk PE=1 SV=1;Heterogeneous nuclear ribonucleoprotein K OS=Rattus norvegicus GN=Hnrnpk PE=1 SV=1;Putative uncharacterized protein OS=Mus musculus GN=Hnrnpk PE=2 SV=1;Heterogeneous nuclear ribonucleoprotein K OS=Rattus norvegicus GN=Hnrnpk PE=1 SV=1;Hnrpk…	4.33333	6.66667	4.83333	AYEPQGGSGYDYSYAGGR+DQIQNAQYLLQNSVK+FDCELRLLIHQSLAGGIIGVKGAK+GSYGDLGGPIITTQVTIPK+IILDLISESPIK+IIPTLEEGLQLPSPTATSQLPLESDAVECLNYQHYK+IITITGTQDQIQNAQYLLQNSVK+NLPLPPPPPPR+TDYNASVSVPDSSGPER		One of the major pre-mRNA-binding proteins. Binds tenaciously to poly(C) sequences. Likely to play a role in the nuclear metabolism of hnRNAs, particularly for pre-mRNAs that contain cytidine-rich sequences. Can also bind poly(C) single-stranded DNA. Plays an important role in p53/TP53 response to DNA damage, acting at the level of both transcription activation and repression. When sumoylated, ac…		GO:1904322 cellular processGO:0032869 cellular processGO:0021987 developmental processGO:0006397 cellular processGO:0043066 regulationGO:2000173 regulationGO:0010629 regulationGO:0048025 regulationGO:0032091 regulationGO:0000122 regulationGO:0001541 developmental processGO:1903861 regulationGO:0060999 regulationGO:1900273 regulationGO:0045716 regulationGO:0010976 regulationGO:2000010 regulationGO…	GO:0043679 (other, cell projection) GO:0071013 (nucleus, intracellular) GO:0005938 (cytoplasm, cell periphery) GO:0030054 (other) GO:0010494 (nucleus, intracellular) GO:0005829 (cytoplasm, intracellular) GO:0043197 (other, cell projection) GO:0005739 (mitochondria, intracellular) GO:0000790 (chromosome, intracellular) GO:0005654 (nucleus, intracellular) GO:0005634 (nucleus, intracellular) GO:0002…	GO:0042805 (binding, protein binding) GO:0051117 (binding, protein binding) GO:1990829 (binding, heterocyclic compound binding) GO:0003690 (binding, heterocyclic compound binding) GO:0031072 (binding, protein binding) GO:0042802 (binding, protein binding) GO:0005521 (binding, protein binding) GO:0003730 (binding, heterocyclic compound binding) GO:1990715 (binding, heterocyclic compound binding) G…
119	P16401	1	HIST1H1B	Histone H1.5 OS=Homo sapiens GN=HIST1H1B PE=1 SV=3	1.875	1.5625	1.5	ALAAGGYDVEK+ATGPPVSELITK+SETAPAETATPAPVEK	226	Histone H1 protein binds to linker DNA between nucleosomes forming the macromolecular structure known as the chromatin fiber. Histones H1 are necessary for the condensation of nucleosome chains into higher-order structured fibers. Acts also as a regulator of individual gene transcription through chromatin remodeling, nucleosome spacing and DNA methylation (By similarity).		GO:0006325 cellular component organization or biogenesisGO:0071169 localizationGO:0000122 regulationGO:0006334 cellular component organization or biogenesisGO:0030307 regulationGO:0051574 regulationGO:0050821 regulation	GO:0000790 (chromosome, intracellular) GO:0005720 (chromosome, intracellular) GO:0000786 (chromosome, intracellular) GO:0005634 (nucleus, intracellular)	GO:0031490 (binding, chromatin binding) GO:0042826 (binding, protein binding) GO:0003723 (binding, heterocyclic compound binding)
120	P81155	1	Vdac2	Voltage-dependent anion-selective channel protein 2 OS=Rattus norvegicus GN=Vdac2 PE=1 SV=2;Voltage-dependent anion-selective channel protein 2 OS=Mus musculus GN=Vdac2 PE=1 SV=2;Voltage-dependent anion-selective channel protein 2 OS=Cricetulus griseus GN=I79_002192 PE=4 SV=1;Voltage-dependent anion-selective channel protein 2 (Fragment) OS=Mus musculus GN=Vdac2 PE=1 SV=1	1.29412	1	1.88235	LSALVDGK+LTFDTTFSPNTGK+LTLSALVDGK+SFNAGGHK+SNFAVGYR+TGDFQLHTNVNNGTEFGGSIYQK+VNNSSLIGVGYTQTLR+WCEYGLTFTEK+WNTDNTLGTEIAIEDQICQGLK+YQLDPTASISAK
121	A0A1U7QGG1	1	Hnrnpk	heterogeneous nuclear ribonucleoprotein K isoform X2 OS=Mesocricetus auratus GN=Hnrnpk PE=4 SV=1;heterogeneous nuclear ribonucleoprotein K isoform X3 OS=Mesocricetus auratus GN=Hnrnpk PE=4 SV=1;heterogeneous nuclear ribonucleoprotein K isoform X1 OS=Mesocricetus auratus GN=Hnrnpk PE=4 SV=1;heterogeneous nuclear ribonucleoprotein K isoform X4 OS=Mesocricetus auratus GN=Hnrnpk PE=4 SV=1	4.33333	6.66667	4.83333	AYEPQGGSGYDYSYAGGR+DQIQNAQYLLQNSVK+FDCELRLLIHQSLAGGIIGVKGAK+GSYGDLGGPIITTQVTIPK+IILDLISESPIK+IITITGTQDQIQNAQYLLQNSVK+NLPLPPPPPPR+TDYNASVSVPDSSGPER	463			GO:0006357 regulationGO:0006396 cellular process		GO:0003677 (binding, heterocyclic compound binding) GO:0003723 (binding, heterocyclic compound binding)
122	G3V852	1	Tln1	RCG55135, isoform CRA_b OS=Rattus norvegicus GN=Tln1 PE=1 SV=1	5.18182	1.72727	1.18182	AATAPLLEAVDNLSAFASNPEFSSVPAQISPEGR+AIAVTVQEMVTK+ALGDLISATK+AVAEQIPLLVQGVR+DKAPGQLECETAIAALNSCLR+EADESLNFEEQILEAAK+FGQDFSTFLEAGVEMAGQAPSQEDR+GLAGAVSELLR+GTEWVDPEDPTVIAENELLGAAAAIEAAAK+GVAALTTDPAVQAIVLDTASDALDK+ILAQATSDLVNAIK+LAQAAQSSVATITR+LLAALLEDEGGNGRPLLQAAK+LLGEIAQGNENYAGIAAR+LNEAAAGLNQAATELVQASR+MVAAATNNLCEAANAAVQGHASQEK+NLGTALAELR+QAAASATQTIAAAQHAASAPK+SNTSPEELGPLANQLTSDYGR+TLAESALQLLYTAK+TM…	2541			GO:0007155 interaction with cells and organismsGO:0007044 cellular component organization or biogenesisGO:0030866 cellular component organization or biogenesisGO:0007016 regulationGO:0033622 cellular component organization or biogenesisGO:0007229 regulation	GO:0005856 (cytoskeleton, intracellular) GO:0005925 (other, anchoring junction) GO:0001726 (other, cell leading edge)	GO:0051015 (binding, macromolecular complex binding) GO:0005178 (binding, macromolecular complex binding) GO:0030274 (binding, protein binding) GO:0035091 (binding, ion binding) GO:0001786 (binding, ion binding) GO:0044877 (binding, macromolecular complex binding) GO:0005200 (structural molecule activity, structural constituent of cytoskeleton) GO:0017166 (binding, protein binding)
123	P68431	1	HIST1H3A	Histone H3.1 OS=Homo sapiens GN=HIST1H3A PE=1 SV=2;Histone H3.3 OS=Homo sapiens GN=H3F3A PE=1 SV=2;Histone H3.1t OS=Homo sapiens GN=HIST3H3 PE=1 SV=3;Histone H3.2 OS=Homo sapiens GN=HIST2H3A PE=1 SV=3;Histone H3 OS=Homo sapiens GN=H3F3A PE=2 SV=1;Histone H3 OS=Homo sapiens PE=2 SV=1;Histone H3 OS=Homo sapiens GN=H3F3A PE=1 SV=1;Histone H3 OS=Homo sapiens PE=2 SV=1;Histone H3 (Fragment) OS=Homo sa…	1.54545	4.81818	1.09091	EIAQDFK+STELLIR+YRPGTVALR	136	Core component of nucleosome. Nucleosomes wrap and compact DNA into chromatin, limiting DNA accessibility to the cellular machineries which require DNA as a template. Histones thereby play a central role in transcription regulation, DNA repair, DNA replication and chromosomal stability. DNA accessibility is regulated via a complex set of post-translational modifications of histones, also called h…		GO:0007596 regulationGO:0044267 cellular processGO:0006325 cellular component organization or biogenesisGO:0000183 regulationGO:0006335 cellular component organization or biogenesisGO:0038111 regulationGO:0045814 regulationGO:0006334 cellular component organization or biogenesisGO:0051290 cellular component organization or biogenesisGO:0060968 regulationGO:0060964 regulationGO:0045652 regulationG…	GO:0070062 (extracellular, extracellular exosome) GO:0005576 (extracellular) GO:0016020 (other) GO:0000228 (chromosome, intracellular) GO:0000788 (chromosome, intracellular) GO:0005654 (nucleus, intracellular) GO:0000786 (chromosome, intracellular) GO:0005634 (nucleus, intracellular) GO:0032991 (macromolecular complex)	GO:0045296 (binding, protein binding) GO:0031492 (binding, chromatin binding) GO:0046982 (binding, protein binding)
124	Q63081	1	Pdia6	Protein disulfide-isomerase A6 OS=Rattus norvegicus GN=Pdia6 PE=1 SV=2;Protein disulfide-isomerase A6 OS=Rattus norvegicus GN=Pdia6 PE=1 SV=1	0.435897	0.641026	0.487179	ALDLFSDNAPPPELLEIINEDIAK+AVNADKHQSLGGQYGVQGFPTIK+EPWDGKDGELPVEDDIDLSDVELDDLEKDEL+GSFSEQGINEFLR+GSTAPVGGGSFPNITPR+HQSLGGQYGVQGFPTIK+LAAVDATVNQVLASR+NLEPEWAAAATEVK+NSYLEVLLK+TGEAIVDAALSALR		May function as a chaperone that inhibits aggregation of misfolded proteins. Negatively regulates the unfolded protein response (UPR) through binding to UPR sensors such as ERN1, which in turn inactivates ERN1 signaling. May also regulate the UPR via the EIF2AK3 UPR sensor. Plays a role in platelet aggregation and activation by agonists such as convulxin, collagen and thrombin.	Catalyzes the rearrangement of -S-S- bonds in proteins.	GO:0043277 localizationGO:0045454 regulationGO:0030168 regulationGO:0070527 interaction with cells and organismsGO:0006457 cellular processGO:0034976 cellular process	GO:0005788 (er, endomembrane system) GO:0005793 (er, intracellular) GO:0042470 (other intracellular organelles, intracellular) GO:0005886 (plasma membrane, cell periphery) GO:0005790 (er, endomembrane system)	GO:0005509 (binding, ion binding) GO:0003756 (catalytic activity, isomerase activity)
125	G3V9M6	1	Fbn1	Fibrillin 1 OS=Rattus norvegicus GN=Fbn1 PE=1 SV=1;Fibrillin-1 OS=Rattus norvegicus GN=Fbn1 PE=2 SV=1	1.17391	0.869565	1.08696	CECFPGLAVGLDGR+CECPSGMTLDATGR+CICKPGFQLASDGR+CICNSGYEVDITGK+CLCPEGFSLSSTGR+CPPGFYTSPDGTR+CPVGYVLR+DLDECATK+EGYCFSEVLQNMCQIGSSNR+GEGWGDPCELCPTEPDEAFR+GFSLDQSGASCEDVDECEGNHR+GFVYKPDLK+GTCWQTVIDGR+GTQCEDINECEVFPGVCK+GWGPHCEICPFEGTVAYK+GYIGTHCGQPVCESGCLNGGR+IKGTQCEDINECEVFPGVCK+MIPSLCTHGK+NCEDMDECSIR+NCVDINECVLNSLLCDNGQCR+SECCSSLGAAWGSPCTICQVDPICGK+SIQHCSIR+TCVDINECVLDPGK+TCVDVNECDLNPNICLSGTCENTK+TLC…	2872			GO:0009653 developmental processGO:0043010 developmental processGO:0033627 interaction with cells and organismsGO:1990314 cellular processGO:0071560 cellular processGO:0048048 developmental processGO:0007507 developmental processGO:0001822 developmental processGO:0001656 developmental processGO:2001205 regulationGO:0048050 developmental processGO:0090287 regulationGO:0035582 regulationGO:0035583 …	GO:0005604 (extracellular, extracellular matrix) GO:0031012 (extracellular, extracellular matrix) GO:0005576 (extracellular) GO:0005615 (extracellular, extracellular region part) GO:0001527 (extracellular, extracellular matrix)	GO:0005509 (binding, ion binding) GO:0005201 (structural molecule activity, extracellular matrix structural constituent) GO:0008201 (binding, carbohydrate derivative binding) GO:0042802 (binding, protein binding) GO:0005178 (binding, macromolecular complex binding)
126	P01029	1	C4b	Complement C4-B OS=Mus musculus GN=C4b PE=1 SV=3;Complement component 4B (Childo blood group) OS=Mus musculus GN=C4b PE=2 SV=1;Complement component 4B (Childo blood group) OS=Mus musculus GN=C4b PE=2 SV=1	0.772727	1.72727	0.590909	AMQGGLVGSDETVALTAFVVIALHHGLDVFQDDDAK+CCQDGMTKLPMK+DTMASIGQTR+EELVYNLDPLNNLGR+FQAALDK+GLCVAKPTR+KEIFTSTSIFQDAFTIPDISEPGTWK+NSFLGQK+TQVLHFR+VQYTVCIWR	1738	Non-enzymatic component of C3 and C5 convertases and thus essential for the propagation of the classical complement pathway. Covalently binds to immunoglobulins and immune complexes and enhances the solubilization of immune aggregates and the clearance of IC through CR1 on erythrocytes. Catalyzes the transacylation of the thioester carbonyl group to form ester bonds with carbohydrate antigens (By…		GO:0006956 regulationGO:0006958 regulationGO:0016064 immune system processGO:0006954 response to stimulusGO:0045087 immune system process	GO:0030424 (other, cell projection) GO:0030054 (other) GO:0030425 (other, cell projection) GO:0005576 (extracellular) GO:0005615 (extracellular, extracellular region part) GO:0043025 (other, cell body) GO:0044216 (other, other organism part) GO:0045202 (other)	GO:0030246 (binding, carbohydrate binding) GO:0001848 (binding, protein binding) GO:0001849 (binding, protein binding) GO:0004866 (molecular function regulator, enzyme regulator activity)
127	P08399	1	Phxr5	Putative per-hexamer repeat protein 5 OS=Mus musculus GN=Phxr5 PE=5 SV=2	0.555556	0.444444	0.222222	GTGTGTATATGTGTGTGTGTGTGTGTGTGTDTSTGTDRGTGTGTGTA+VTDTGTGTGTAK+VTGTAKVTGTGTGTAKVTGTGTGTGTGTGTGTGTGTDTGTGTAK+VTGTAKVTGTGTGTGTGTGTGTGTGTGTGTGTAK+VTGTAKVTGTGTGTGTGTGTGTGTGTGTGTGTAKVTGTGTDR+VTGTATGTGTGTDTGTGTGTGTGTGTGSGSGTAK+VTGTATTTATVTETGTAKVTGTDTGTAK+VTGTDTGTAKVTGTGTGTGTGTGTGTGTGTGTGTGTGTGTGTGTGTGTGTGTGTGSGSGTAK+VTGTGTGTAK+VTGTGTGTGTGTGTGTGTGTDTGTGTAK+VTGTGTGTGTGTGTGTGTGTDTGTGTAKVTGTGTGTGTGTGTGTGTGT…	672			GO:0030154 cellular processGO:0007165 regulation	GO:0009986 (cell surface, cell surface) GO:0005615 (extracellular, extracellular region part)
128	Q3TST6	1	Col11a1	Uncharacterized protein (Fragment) OS=Mus musculus GN=Col11a1 PE=2 SV=1	1.82353	1.94118	1.11765	EGAKGDPGPQGISGKDGPAGIR+GAPGEKGPQGPAGRDGVQGPVGLPGPAGPAGSPGEDGDK+GARGPTGKPGPKGTSGGDGPPGPPGER+GDGGIPGPAGPIGPPGPPGLPGPAGPKGNK+GDKGENGPPGPPGLQGPVGAPGIAGGDGEPGPR+GDKGENGPPGPPGLQGPVGAPGIAGGDGEPGPRGQQGMFGQK+GDRGFDGLPGLPGDKGHR+GEAGPPGAAGPAGIKGPPGDDGPKGNPGPVGFPGDPGPPGEPGPAGQDGVGGDK+GEDGDPGQPGPPGPSGEAGPPGPPGKR+GEDGEIGPRGLPGEAGPRGLLGPR+GEDGFPGFKGDMGIKGDR+GEKGEAGPPGAAGPAGIKGPPGDDGPK+GENGDVGPMGPPGPPGPR+GENGDVG…	1286					GO:0005201 (structural molecule activity, extracellular matrix structural constituent)
129	E2RA50	1		Uncharacterized protein OS=Canis familiaris PE=4 SV=2;Uncharacterized protein OS=Canis familiaris PE=4 SV=1	4.33333	6.66667	4.83333	AYEPQGGSGYDYSYAGGR+DQIQNAQYLLQNSVK+GSYGDLGGPIITTQVTIPK+IILDLISESPIK+IITITGTQDQIQNAQYLLQNSVK+NLPLPPPPPPR+TDYNASVSVPDSSGPER	439			GO:0006357 regulationGO:0006396 cellular process		GO:0003677 (binding, heterocyclic compound binding) GO:0003723 (binding, heterocyclic compound binding)
130	P17879	1	Hspa1b	Heat shock 70 kDa protein 1B OS=Mus musculus GN=Hspa1b PE=1 SV=3;Heat shock 70 kDa protein 1A OS=Mus musculus GN=Hspa1a PE=1 SV=2;Inducible heat shock protein 70 OS=Mus musculus PE=3 SV=1;Putative uncharacterized protein OS=Mus musculus PE=2 SV=1;Heat shock protein 1B OS=Mus musculus GN=Hspa1b PE=1 SV=1	2.47059	1.35294	1.05882	DAGVIAGLNVLR+EIAEAYLGHPVTNAVITVPAYFNDSQR+IINEPTAAAIAYGLDR+LIGDAAK+NALESYAFNMK+NAVITVPAYFNDSQR+QTQTFTTYSDNQPGVLIQVYEGER+SFFPEEISSMVLTK+TTPSYVAFTDTER+VEIIANDQGNR	642	Molecular chaperone implicated in a wide variety of cellular processes, including protection of the proteome from stress, folding and transport of newly synthesized polypeptides, activation of proteolysis of misfolded proteins and the formation and dissociation of protein complexes. Plays a pivotal role in the protein quality control system, ensuring the correct folding of proteins, the re-foldin…		GO:0007339 cellular processGO:0043066 regulationGO:0043154 regulationGO:0090063 regulationGO:0042026 cellular processGO:1901673 regulationGO:0009408 response to stimulus	GO:0044297 (other, cell body) GO:0005813 (cytoskeleton, intracellular) GO:0005622 (other, intracellular) GO:0005759 (mitochondria, intracellular) GO:0005739 (mitochondria, intracellular) GO:0002199 (macromolecular complex, protein complex)	GO:0005524 (binding, carbohydrate derivative binding)
131	E9PV14	0.9996	Epb41l1	Band 4.1-like protein 1 OS=Mus musculus GN=Epb41l1 PE=1 SV=1	2.88889	3	2.33333	EESGSSLTEILADGR+KNPPGGGGGGGGGGGGGGGGGGGGGGR+KNPPGGGGGGGGGGGGGGGGGGGGGGRVHLDAQACALLR+NPPGGGGGGGGGGGGGGGGGGGGGGR+NPPGGGGGGGGGGGGGGGGGGGGGGRVHLDAQACALLR+NPPGGGGGGGGGGGGGGGGGGGGGGRVHLDAQACALLRTIPPCVR+WKKNPPGGGGGGGGGGGGGGGGGGGGGGR	1064			GO:0030866 cellular component organization or biogenesis	GO:0005856 (cytoskeleton, intracellular)	GO:0008092 (binding, protein binding)
132	P02091	1	Hbb	Hemoglobin subunit beta-1 OS=Rattus norvegicus GN=Hbb PE=1 SV=3;Globin a4 OS=Rattus norvegicus GN=Hbb PE=1 SV=1	1.47826	1	0.869565	FGDLSSASAIMGNPKVK+KVINAFNDGLK+LLVVYPWTQR+VINAFNDGLK+VNPDDVGGEALGR+VVAGVASALAHK+YFDSFGDLSSASAIMGNPK	147	Involved in oxygen transport from the lung to the various peripheral tissues.		GO:0006749 cellular processGO:0015671 localizationGO:0051291 cellular component organization or biogenesis	GO:0005833 (macromolecular complex, intracellular)	GO:0020037 (binding, heterocyclic compound binding) GO:0031721 (binding, protein binding) GO:0031722 (binding, protein binding) GO:0046872 (binding, ion binding) GO:0019825 (binding, oxygen binding) GO:0005344 (transporter, substrate-specific transporter activity)
133	P26039	1	Tln1	Talin-1 OS=Mus musculus GN=Tln1 PE=1 SV=2;Uncharacterized protein OS=Mus musculus GN=Tln1 PE=2 SV=1;MKIAA1027 protein (Fragment) OS=Mus musculus GN=Tln1 PE=2 SV=4	5.18182	1.72727	1.18182	AIAVTVQEMVTK+AKAVEGCVSASQAATEDGQLLR+AVAEQIPLLVQGVR+AVASAAAALVLK+EADESLNFEEQILEAAK+FGQDFSTFLEAGVEMAGQAPSQEDR+GLAGAVSELLR+GSQAQPDSPSAQLALIAASQSFLQPGGK+GTEWVDPEDPTVIAENELLGAAAAIEAAAK+ILAQATSDLVNAIK+LAQAAQSSVATITR+LIAASQSFLQPGGKMVAAAK+LNEAAAGLNQAATELVQASR+SNTSPEELGPLANQLTSDYGR+TEDSGLQTQVIAAATQCALSTSQLVACTK+TLAESALQLLYTAK+TLSHPQQMALLDQTK+TMLESAGGLIQTAR+TSALCNSCRLASAR+TVTDMLMTICAR+VLGEAMTGISQNAK+VMVTNV…	2541	Probably involved in connections of major cytoskeletal structures to the plasma membrane. High molecular weight cytoskeletal protein concentrated at regions of cell-substratum contact and, in lymphocytes, at cell-cell contacts.		GO:0007155 interaction with cells and organismsGO:0007044 cellular component organization or biogenesisGO:0030866 cellular component organization or biogenesisGO:0007016 regulationGO:0033622 cellular component organization or biogenesisGO:0007229 regulation	GO:0009986 (cell surface, cell surface) GO:0005737 (cytoplasm, intracellular) GO:0005856 (cytoskeleton, intracellular) GO:0005925 (other, anchoring junction) GO:0001726 (other, cell leading edge) GO:0032587 (plasma membrane, cell leading edge)	GO:0051015 (binding, macromolecular complex binding) GO:0005178 (binding, macromolecular complex binding) GO:0030274 (binding, protein binding) GO:0035091 (binding, ion binding) GO:0001786 (binding, ion binding) GO:0044877 (binding, macromolecular complex binding) GO:0005200 (structural molecule activity, structural constituent of cytoskeleton) GO:0017166 (binding, protein binding)
134	P02545-3	1	LMNA	Isoform ADelta10 of Prelamin-A/C OS=Homo sapiens GN=LMNA;Isoform 4 of Prelamin-A/C OS=Homo sapiens GN=LMNA;Isoform 5 of Prelamin-A/C OS=Homo sapiens GN=LMNA;Isoform 6 of Prelamin-A/C OS=Homo sapiens GN=LMNA;Prelamin-A/C OS=Homo sapiens GN=LMNA PE=1 SV=1;Prelamin-A/C OS=Mus musculus GN=Lmna PE=1 SV=2	1.70588	1.35294	1.23529	IDSLSAQLSQLQK+LADALQELR+MQQQLDEYQELLDIK+NSNLVGAAHEELQQSR+TVLCGTCGQP		Prelamin-A/C can accelerate smooth muscle cell senescence. It acts to disrupt mitosis and induce DNA damage in vascular smooth muscle cells (VSMCs), leading to mitotic failure, genomic instability, and premature senescence.		GO:0034613 localizationGO:0071456 cellular processGO:0030951 cellular component organization or biogenesisGO:0036498 regulationGO:0007084 cellular component organization or biogenesisGO:0007517 developmental processGO:1903243 regulationGO:0008285 regulationGO:2001237 regulationGO:0072201 regulationGO:0090201 regulationGO:0006998 cellular component organization or biogenesisGO:0090343 regulationGO…	GO:0005829 (cytoplasm, intracellular) GO:0005882 (cytoskeleton, intracellular) GO:0005638 (nucleus, intracellular) GO:0005635 (nucleus, endomembrane system) GO:0005652 (nucleus, intracellular) GO:0031965 (nucleus, endomembrane system) GO:0016607 (nucleus, intracellular) GO:0005654 (nucleus, intracellular) GO:0005634 (nucleus, intracellular) GO:0048471 (nucleus, intracellular)	GO:0042802 (binding, protein binding) GO:0005198 (structural molecule activity)
135	F7GLE2	1	LMNA	Uncharacterized protein OS=Macaca mulatta GN=LMNA PE=3 SV=1;Prelamin-A/C isoform 1 OS=Macaca mulatta GN=LMNA PE=2 SV=1;Putative uncharacterized protein OS=Macaca fascicularis GN=EGM_01175 PE=3 SV=1	1.70588	1.35294	1.23529	IDSLSAQLSQLQK+LADALQELR+MQQQLDEYQELLDIK+NSNLVGAAHEELQQSR+TVLCGTCGQP	633				GO:0005882 (cytoskeleton, intracellular)	GO:0005198 (structural molecule activity)
136	F1PBJ3	1	LMNA	Uncharacterized protein OS=Canis familiaris GN=LMNA PE=3 SV=1;Uncharacterized protein OS=Canis familiaris GN=LMNA PE=3 SV=1	1.70588	1.35294	1.23529	IDSLSAQLSQLQK+LADALQELR+MQQQLDEYQELLDIK+NSNLVGAAHEELQQSR+TVLCGTCGQP	665				GO:0005882 (cytoskeleton, intracellular)	GO:0005198 (structural molecule activity)
137	P0CG38	1	POTEI	POTE ankyrin domain family member I OS=Homo sapiens GN=POTEI PE=3 SV=1	19.6667	11	1.66667	AGFAGDDAPR+AVFPSIVGR+ELTDYLMK+LCYVALDFEQEMAMAASSSSLEK+LSGGTTMYPGMAHR+QEYDESGPSIVHR+VAPEEHPILLTEAPLNPK	1075			GO:0001895 regulation	GO:0070062 (extracellular, extracellular exosome) GO:0005615 (extracellular, extracellular region part)
138	F6WT88	1	VCP	Uncharacterized protein OS=Macaca mulatta GN=VCP PE=4 SV=1;Transitional endoplasmic reticulum ATPase (Fragment) OS=Macaca mulatta GN=EGK_07584 PE=3 SV=1;Transitional endoplasmic reticulum ATPase (Fragment) OS=Macaca fascicularis GN=EGM_06879 PE=3 SV=1;Transitional endoplasmic reticulum ATPase OS=Macaca mulatta GN=VCP PE=2 SV=1	1.25	1.5	1.1	AIANECQANFISIK+ELQELVQYPVEHPDK+ETVVEVPQVTWEDIGGLEDVK+EVDIGIPDATGR+GILLYGPPGTGK+LDQLIYIPLPDEK+LGDVISIQPCPDVK+LIVDEAINEDNSVVSLSQPK+MDELQLFR+MTNGFSGADLTEICQR+NAPAIIFIDELDAIAPK+QAAPCVLFFDELDSIAK+VINQILTEMDGMSTK+VVETDPSPYCIVAPDTVIHCEGEPIK+WALSQSNPSALR+YEMFAQTLQQSR	806			GO:0006919 regulationGO:0070842 cellular component organization or biogenesisGO:0046034 cellular processGO:0097352 cellular component organization or biogenesisGO:1903843 cellular processGO:0034605 cellular processGO:0006302 cellular processGO:0032510 localizationGO:0071712 cellular processGO:0072389 cellular processGO:0006734 cellular processGO:2001171 regulationGO:0090263 regulationGO:1903007 r…	GO:1904949 (macromolecular complex, catalytic complex) GO:0010494 (nucleus, intracellular) GO:0005829 (cytoplasm, intracellular) GO:0036513 (er, endomembrane system) GO:0005811 (other intracellular organelles, intracellular) GO:0043209 (other, myelin sheath) GO:0005654 (nucleus, intracellular) GO:0048471 (nucleus, intracellular) GO:0000502 (macromolecular complex, intracellular) GO:0035861 (chrom…	GO:0043531 (binding, carbohydrate derivative binding) GO:0005524 (binding, carbohydrate derivative binding) GO:0016887 (catalytic activity, hydrolase activity) GO:1904288 (binding, macromolecular complex binding) GO:0035800 (molecular function regulator, enzyme regulator activity) GO:0042802 (binding, protein binding) GO:0036435 (binding, protein binding) GO:0042288 (binding, protein binding) GO:…
139	E2RLQ9	1	VCP	Uncharacterized protein (Fragment) OS=Canis familiaris GN=VCP PE=3 SV=2	1.29412	1.82353	1.76471	AIANECQANFISIK+ELQELVQYPVEHPDK+ETVVEVPQVTWEDIGGLEDVK+EVDIGIPDATGR+GILLYGPPGTGK+LDQLIYIPLPDEK+LGDVISIQPCPDVK+LIVDEAINEDNSVVSLSQPK+MDELQLFR+MTNGFSGADLTEICQR+NAPAIIFIDELDAIAPK+QAAPCVLFFDELDSIAK+VINQILTEMDGMSTK+VVETDPSPYCIVAPDTVIHCEGEPIK+WALSQSNPSALR+YEMFAQTLQQSR	822			GO:0006919 regulationGO:0070842 cellular component organization or biogenesisGO:0046034 cellular processGO:0097352 cellular component organization or biogenesisGO:1903843 cellular processGO:0034605 cellular processGO:0006302 cellular processGO:0032510 localizationGO:0071712 cellular processGO:0072389 cellular processGO:0006734 cellular processGO:2001171 regulationGO:0090263 regulationGO:1903007 r…	GO:1904949 (macromolecular complex, catalytic complex) GO:0010494 (nucleus, intracellular) GO:0005829 (cytoplasm, intracellular) GO:0036513 (er, endomembrane system) GO:0005811 (other intracellular organelles, intracellular) GO:0043209 (other, myelin sheath) GO:0005654 (nucleus, intracellular) GO:0048471 (nucleus, intracellular) GO:0000502 (macromolecular complex, intracellular) GO:0035861 (chrom…	GO:0043531 (binding, carbohydrate derivative binding) GO:0005524 (binding, carbohydrate derivative binding) GO:0016887 (catalytic activity, hydrolase activity) GO:1904288 (binding, macromolecular complex binding) GO:0035800 (molecular function regulator, enzyme regulator activity) GO:0042802 (binding, protein binding) GO:0036435 (binding, protein binding) GO:0042288 (binding, protein binding) GO:…
140	P18163	1	Acsl1	Long-chain-fatty-acid--CoA ligase 1 OS=Rattus norvegicus GN=Acsl1 PE=1 SV=1	2.38462	1.30769	2.69231	AELSVIFADKPEK+ALKPPCDLSMQSVEVTGTTEGVR+CGVEIIGLK+GYLKDPAR+IENIYLR+IQSSLGGK+KPNQPYEWISYK+LAQGEYIAPEK+LVDVEDMNYQAAK+MEVHELFR+QVAEMAECIGSALIQK+SQIDELYSTIK+SQIDELYSTIKI+TKPKPPEPEDLAIICFTSGTTGNPK+VLQPTIFPVVPR+WLLDFASK+WLLDFASKRK	699	Activation of long-chain fatty acids for both synthesis of cellular lipids, and degradation via beta-oxidation. Preferentially uses oleate, arachidonate, eicosapentaenoate and docosahexaenoate as substrates.	ATP + a long-chain fatty acid + CoA = AMP + diphosphate + an acyl-CoA.	GO:0033211 regulationGO:0006631 cellular processGO:0015908 localizationGO:0006629 metabolic processGO:0044539 localizationGO:0035338 cellular processGO:0071902 regulationGO:0042493 response to stimulusGO:0007584 response to stimulusGO:0034201 response to stimulusGO:0014070 response to stimulusGO:0010033 response to stimulusGO:0019432 cellular processGO:0042178 cellular process	GO:0005783 (er, endomembrane system) GO:0005789 (er, endomembrane system) GO:0016021 (other, membrane part) GO:0005741 (mitochondria, envelope) GO:0005778 (peroxisome/microbody, intracellular) GO:0005886 (plasma membrane, cell periphery)	GO:0003987 (catalytic activity, ligase activity) GO:0005524 (binding, carbohydrate derivative binding) GO:0102391 (catalytic activity, ligase activity) GO:0004467 (catalytic activity, ligase activity)
141	P48721	1	Hspa9	Stress-70 protein, mitochondrial OS=Rattus norvegicus GN=Hspa9 PE=1 SV=3;Stress-70 protein, mitochondrial OS=Rattus norvegicus GN=Hspa9 PE=1 SV=1	2.75	1.375	6.75	AQFEGIVTDLIK+DAGQISGLNVLR+EQQIVIQSSGGLSK+IQKGVFEVKSTNGDTFLGGEDFDQALLR+LYSPSQIGAFVLMK+NAVITVPAYFNDSQR+QAASSLQQASLK+SDIGEVILVGGMTR+SQVFSTAADGQTQVEIK+STNGDTFLGGEDFDQALLR+TTPSVVAFTPDGER+VEAVNMAEGIIHDTETK+VINEPTAAALAYGLDK+VQQTVQDLFGR	679	Chaperone protein which plays an important role in mitochondrial iron-sulfur cluster (ISC) biogenesis. Interacts with and stabilizes ISC cluster assembly proteins FXN, NFU1, NFS1 and ISCU. Regulates erythropoiesis via stabilization of ISC assembly. May play a role in the control of cell proliferation and cellular aging.		GO:0071347 cellular processGO:0030218 regulationGO:0016226 cellular component organization or biogenesisGO:0060548 regulationGO:0045647 regulationGO:1902037 regulationGO:1903707 regulationGO:0046777 cellular processGO:0006457 cellular processGO:0045646 regulationGO:0051593 response to stimulusGO:0097068 response to stimulusGO:0009636 response to stimulus	GO:0005737 (cytoplasm, intracellular) GO:0005739 (mitochondria, intracellular) GO:0005730 (nucleus, intracellular)	GO:0005524 (binding, carbohydrate derivative binding) GO:0051087 (binding, protein binding) GO:0017134 (binding, protein binding) GO:0031072 (binding, protein binding) GO:0051082 (binding, protein binding)
142	P45880-1	1	VDAC2	Isoform 1 of Voltage-dependent anion-selective channel protein 2 OS=Homo sapiens GN=VDAC2;Isoform 2 of Voltage-dependent anion-selective channel protein 2 OS=Homo sapiens GN=VDAC2;Voltage-dependent anion-selective channel protein 2 OS=Homo sapiens GN=VDAC2 PE=1 SV=2;Voltage-dependent anion channel 2, isoform CRA_a OS=Homo sapiens GN=VDAC2 PE=4 SV=1;Voltage-dependent anion channel 2, isoform CRA_c…	1.3125	1.125	1.9375	LTFDTTFSPNTGK+LTLSALVDGK+TGDFQLHTNVNDGTEFGGSIYQK+TNVNDGTEFGGSIYQK+WCEYGLTFTEK+WNTDNTLGTEIAIEDQICQGLK+YQLDPTASISAK		Forms a channel through the mitochondrial outer membrane that allows diffusion of small hydrophilic molecules. The channel adopts an open conformation at low or zero membrane potential and a closed conformation at potentials above 30-40 mV. The open state has a weak anion selectivity whereas the closed state is cation-selective.		GO:0006820 localizationGO:0007339 cellular processGO:2001243 regulationGO:0032272 regulation	GO:0001669 (other intracellular organelles, endomembrane system) GO:0045121 (other, membrane part) GO:0042645 (mitochondria, intracellular) GO:0005741 (mitochondria, envelope) GO:0005739 (mitochondria, intracellular) GO:0043209 (other, myelin sheath) GO:0005634 (nucleus, intracellular) GO:0046930 (macromolecular complex, protein complex) GO:0008021 (other intracellular organelles, endomembrane sy…	GO:0000166 (binding, heterocyclic compound binding) GO:0015288 (transporter, transmembrane transporter activity) GO:0008308 (transporter, substrate-specific transporter activity)
143	Q15084-2	1	PDIA6	Isoform 2 of Protein disulfide-isomerase A6 OS=Homo sapiens GN=PDIA6;Isoform 3 of Protein disulfide-isomerase A6 OS=Homo sapiens GN=PDIA6;Isoform 4 of Protein disulfide-isomerase A6 OS=Homo sapiens GN=PDIA6;Isoform 5 of Protein disulfide-isomerase A6 OS=Homo sapiens GN=PDIA6;Protein disulfide-isomerase A6 OS=Homo sapiens GN=PDIA6 PE=1 SV=1	0.435897	0.641026	0.487179	ALDLFSDNAPPPELLEIINEDIAK+GSFSEQGINEFLR+GSTAPVGGGAFPTIVER+HHSLGGQYGVQGFPTIK+LAAVDATVNQVLASR+LYSSSDDVIELTPSNFNR+NSYLEVLLK+TGEAIVDAALSALR		May function as a chaperone that inhibits aggregation of misfolded proteins (PubMed:12204115). Negatively regulates the unfolded protein response (UPR) through binding to UPR sensors such as ERN1, which in turn inactivates ERN1 signaling (PubMed:24508390). May also regulate the UPR via the EIF2AK3 UPR sensor (PubMed:24508390). Plays a role in platelet aggregation and activation by agonists such a…	Catalyzes the rearrangement of -S-S- bonds in proteins.	GO:0043277 localizationGO:0045454 regulationGO:0044267 cellular processGO:0036498 regulationGO:0043687 cellular processGO:0006457 cellular processGO:0034976 cellular process	GO:0005829 (cytoplasm, intracellular) GO:0005783 (er, endomembrane system) GO:0034663 (er, endomembrane system) GO:0005788 (er, endomembrane system) GO:0005789 (er, endomembrane system) GO:0005793 (er, intracellular) GO:0070062 (extracellular, extracellular exosome) GO:0005615 (extracellular, extracellular region part) GO:0042470 (other intracellular organelles, intracellular) GO:0005886 (plasma …	GO:0015037 (catalytic activity, oxidoreductase activity) GO:0003756 (catalytic activity, isomerase activity)
144	P47961	1	RPS4	40S ribosomal protein S4 OS=Cricetulus griseus GN=RPS4 PE=2 SV=2;40S ribosomal protein S4, X isoform OS=Mus musculus GN=Rps4x PE=1 SV=2;40S ribosomal protein S4, X isoform OS=Rattus norvegicus GN=Rps4x PE=2 SV=2;40S ribosomal protein S4 OS=Cricetulus griseus GN=H671_xg20714 PE=3 SV=1;40S ribosomal protein S4 OS=Rattus norvegicus GN=Rps4x PE=1 SV=1;40S ribosomal protein S4 OS=Cricetulus griseus GN…	2.05556	1.16667	1.38889	ERHPGSFDVVHVK+FDTGNLCMVTGGANLGR+LTIAEER+TDITYPAGFMDVISIDK+VNDTIQIDLETGK	263			GO:0006412 cellular process	GO:0005840 (ribosome, intracellular)	GO:0019843 (binding, heterocyclic compound binding) GO:0003735 (structural molecule activity, structural constituent of ribosome)
145	P07943	1	Akr1b1	Aldose reductase OS=Rattus norvegicus GN=Akr1b1 PE=1 SV=3	1.5	2.64286	2	AIGVSNFNPLQIER+EVGVALQEK+HIDCAQVYQNEK+MPTLGLGTWK+NLVVIPK+PGQVTEAVK+TTAQVLIR+VAIDMGYR	316	Catalyzes the NADPH-dependent reduction of a wide variety of carbonyl-containing compounds to their corresponding alcohols with a broad range of catalytic efficiencies.	Alditol + NAD(P)(+) = aldose + NAD(P)H.	GO:0071475 cellular processGO:0097238 cellular processGO:1901653 cellular processGO:0044597 cellular processGO:0044598 cellular processGO:0072061 developmental processGO:0060135 interaction with cells and organismsGO:0005996 metabolic processGO:0018931 cellular processGO:0043066 regulationGO:0042415 cellular processGO:0046427 regulationGO:0048661 regulationGO:0035809 regulationGO:0003091 regulati…	GO:0005829 (cytoplasm, intracellular) GO:0005615 (extracellular, extracellular region part) GO:0042629 (other intracellular organelles, intracellular) GO:0005654 (nucleus, intracellular) GO:0033010 (other, cell-cell junction) GO:0048471 (nucleus, intracellular) GO:0032838 (cytoplasm, cell projection) GO:0043220 (other, compact myelin) GO:0097454 (other, cell projection)	GO:0004032 (catalytic activity, oxidoreductase activity) GO:0043795 (catalytic activity, oxidoreductase activity)
146	P01027	1	C3	Complement C3 OS=Mus musculus GN=C3 PE=1 SV=3	0.423077	1.23077	1.15385	ADLECTKPAAR+AGEYIEASYMNLQR+AGQYTDK+AVMVSFQSGYLFIQTDK+CCEDGMR+DDGMLSK+DIIPEEDIISR+DLNMDVSFHLPSR+ELKPGDNLNVNFHLR+FFKPAMPFDLMVFVTNPDGSPASK+GICVADPYEIR+GIPMYSIITPNVLR+GQDLVVLSLPITPEFIPSFR+IFTVDNNLLPVGK+IRYYTYLVMNKGK+ISLAHSLTR+LAHSLTR+NTMFLEICTK+PEEDIISR+QDFFIDLR+QEALELIKK+QNEAFSLTAK+QVLTSEK+RMDKAGQYTDKGLR+SSVAVPYVIVPLK+TVAIHTLDPEKLGQGGVQK+TYLVMNK+VADSVWVDVK+VLVVTQGSNAK+VMQDFFIDLR+VRVELLHNPAFCSMATAK+Y…		Acylation stimulating protein: adipogenic hormone that stimulates triglyceride (TG) synthesis and glucose transport in adipocytes, regulating fat storage and playing a role in postprandial TG clearance. Appears to stimulate TG synthesis via activation of the PLC, MAPK and AKT signaling pathways. Ligand for C5AR2. Promotes the phosphorylation, ARRB2-mediated internalization and recycling of C5AR2.		GO:0097242 interaction with cells and organismsGO:0007596 regulationGO:1905114 regulationGO:0006956 regulationGO:0006957 regulationGO:0006958 regulationGO:0006631 cellular processGO:0006954 response to stimulusGO:0006911 cellular component organization or biogenesisGO:0001970 regulationGO:0045766 regulationGO:2000427 regulationGO:0048639 regulationGO:0070374 regulationGO:0045745 regulationGO:0010…	GO:0005615 (extracellular, extracellular region part) GO:0032991 (macromolecular complex)	GO:0031715 (binding, protein binding) GO:0048037 (binding, cofactor binding) GO:0004866 (molecular function regulator, enzyme regulator activity) GO:0008289 (binding, lipid binding)
147	F1PSC2	1	TLN1	Uncharacterized protein OS=Canis familiaris GN=TLN1 PE=4 SV=2	6.75	1.125	2.375	AIAVTVQEMVTK+AKAVEGCVSASQAATEDGQLLR+AVAEQIPLLVQGVR+AVASAAAALVLK+EADESLNFEEQILEAAK+FGQDFSTFLEAGVEMAGQAPSQEDR+GLAGAVSELLR+GSQAQPDSPSAQLALIAASQSFLQPGGK+GTEWVDPEDPTVIAENELLGAAAAIEAAAK+ILAQATSDLVNAIK+LAQAAQSSVATITR+LIAASQSFLQPGGKMVAAAK+LNEAAAGLNQAATELVQASR+SNTSPEELGPLANQLTSDYGR+TLAESALQLLYTAK+TMLESAGGLIQTAR+TSALCNSCRLASAR+TVTDMLMTICAR+VAGSVTELIQAAEAMKGTE+VLGEAMTGISQNAK+VMVTNVTSLLK+VSQMAQYFEPLTLAAVGAAS…	2541			GO:0007155 interaction with cells and organismsGO:0007044 cellular component organization or biogenesisGO:0030866 cellular component organization or biogenesisGO:0007016 regulationGO:0033622 cellular component organization or biogenesisGO:0007229 regulation	GO:0005856 (cytoskeleton, intracellular) GO:0005925 (other, anchoring junction) GO:0001726 (other, cell leading edge)	GO:0051015 (binding, macromolecular complex binding) GO:0005178 (binding, macromolecular complex binding) GO:0030274 (binding, protein binding) GO:0035091 (binding, ion binding) GO:0001786 (binding, ion binding) GO:0005200 (structural molecule activity, structural constituent of cytoskeleton) GO:0017166 (binding, protein binding)
148	A0A1U7R141	1	Tln1	talin-1 isoform X2 OS=Mesocricetus auratus GN=Tln1 PE=4 SV=1;talin-1 isoform X1 OS=Mesocricetus auratus GN=Tln1 PE=4 SV=1	5.18182	1.72727	1.18182	AIAVTVQEMVTK+AVAEQIPLLVQGVR+AVASAAAALVLK+EADESLNFEEQILEAAK+FGQDFSTFLEAGVEMAGQAPSQEDR+GLAGAVSELLR+GSQAQPDSPSAQLALIAASQSFLQPGGK+GTEWVDPEDPTVIAENELLGAAAAIEAAAK+ILAQATSDLVNAIK+LAQAAQSSVATITR+LIAASQSFLQPGGKMVAAAK+LNEAAAGLNQAATELVQASR+TLAESALQLLYTAK+TLSHPQQMALLDQTK+TMLESAGGLIQTAR+TSALCNSCRLASAR+TVTDMLMTICAR+VAGSVTELIQAAEAMKGTE+VLGEAMTGISQNAK+VMVTNVTSLLK+VSQMAQYFEPLTLAAVGAASK+VVAPTISSPVCQEQLVEAGR	2541			GO:0007155 interaction with cells and organismsGO:0007044 cellular component organization or biogenesisGO:0030866 cellular component organization or biogenesisGO:0007016 regulationGO:0033622 cellular component organization or biogenesisGO:0007229 regulation	GO:0005856 (cytoskeleton, intracellular) GO:0005925 (other, anchoring junction) GO:0001726 (other, cell leading edge)	GO:0051015 (binding, macromolecular complex binding) GO:0005178 (binding, macromolecular complex binding) GO:0030274 (binding, protein binding) GO:0035091 (binding, ion binding) GO:0001786 (binding, ion binding) GO:0005200 (structural molecule activity, structural constituent of cytoskeleton) GO:0017166 (binding, protein binding)
149	P97496-2	1	Smarcc1	Isoform 2 of SWI/SNF complex subunit SMARCC1 OS=Mus musculus GN=Smarcc1;SWI/SNF complex subunit SMARCC1 OS=Mus musculus GN=Smarcc1 PE=1 SV=2;Uncharacterized protein OS=Mus musculus GN=Smarcc1 PE=2 SV=1;SWI/SNF complex subunit SMARCC1 OS=Mus musculus GN=Smarcc1 PE=1 SV=1;Uncharacterized protein OS=Mus musculus GN=Smarcc1 PE=2 SV=1;SWI/SNF complex subunit SMARCC1 OS=Mus musculus GN=Smarcc1 PE=1 SV=1	1.33333	2.4	1.93333	AATAGGGPGAAAGAVGAGGAAAASGLAVYR+AATAGGGPGAAAGAVGAGGAAAASGLAVYRR+AATAGGGPGAAAGAVGAGGAAAASGLAVYRRK+DMEDPTPVPNIEEVVLPKNVNPKK+GGTVADLDEQDEEAVTTGGK+MAATAGGGPGAAAGAVGAGGAAAASGLAVYR+MAATAGGGPGAAAGAVGAGGAAAASGLAVYRR+MAATAGGGPGAAAGAVGAGGAAAASGLAVYRRK		Involved in transcriptional activation and repression of select genes by chromatin remodeling (alteration of DNA-nucleosome topology). Component of SWI/SNF chromatin remodeling complexes that carry out key enzymatic activities, changing chromatin structure by altering DNA-histone contacts within a nucleosome in an ATP-dependent manner. May stimulate the ATPase activity of the catalytic subunit of…		GO:0009887 developmental processGO:0043044 cellular component organization or biogenesisGO:0006338 cellular component organization or biogenesisGO:0006323 cellular component organization or biogenesisGO:0008286 regulationGO:0032435 regulationGO:0007399 developmental processGO:0006337 cellular component organization or biogenesisGO:0045944 regulationGO:0045893 regulationGO:0030850 developmental pr…	GO:0005737 (cytoplasm, intracellular) GO:0005622 (other, intracellular) GO:0071565 (nucleus, intracellular) GO:0071564 (nucleus, intracellular) GO:0005654 (nucleus, intracellular) GO:0005634 (nucleus, intracellular) GO:0016514 (nucleus, intracellular) GO:0001741 (chromosome, intracellular)	GO:0003682 (binding, chromatin binding) GO:0003677 (binding, heterocyclic compound binding) GO:0047485 (binding, protein binding)
150	Q7TMA2	1	Znf503	Zinc finger protein 503 OS=Mus musculus GN=Znf503 PE=1 SV=1	2.38462	3.53846	0.846154	DPEAGGGGSSKGSGGASADGVPAGLGHGR+EPGGGGGGGGGGGGGGGVAAEK+KDPEAGGGGSSKGSGGASADGVPAGLGHGR+KEPGGGGGGGGGGGGGGGVAAEK+LLSGYPSSSSLASAAAAAMACHMHIPTSGAPGSPGTLALR+LSSVASNGGGAGGAGNGAGGDK+LSSVASNGGGAGGAGNGAGGDKDAK+LSSVASNGGGAGGAGNGAGGDKDAKSGPLK+TGSPSSSASACSPGGMLPSAGGGPEGK+TGSPSSSASACSPGGMLPSAGGGPEGKDDK+TGSPSSSASACSPGGMLPSAGGGPEGKDDKK+VPSATCQPFTPRTGSPSSSASACSPGGMLPSAGGGPEGK
151	P05091-2	1	ALDH2	Isoform 2 of Aldehyde dehydrogenase, mitochondrial OS=Homo sapiens GN=ALDH2;Aldehyde dehydrogenase, mitochondrial OS=Homo sapiens GN=ALDH2 PE=1 SV=2;Mitochondrial aldehyde dehydrogenase 2 variant (Fragment) OS=Homo sapiens PE=2 SV=1	3.75	1.08333	2.5	EEIFGPVMQILK+ELGEYGLQAYTEVK+LGPALATGNVVVMK+TEQGPQVDETQFK+TIPIDGDFFSYTR+VAEQTPLTALYVANLIK			An aldehyde + NAD(+) + H(2)O = a carboxylate + NADH.	GO:0006066 metabolic processGO:0005975 metabolic processGO:0006068 metabolic processGO:0006069 metabolic process	GO:0070062 (extracellular, extracellular exosome) GO:0005759 (mitochondria, intracellular)	GO:0004029 (catalytic activity, oxidoreductase activity) GO:0004030 (catalytic activity, oxidoreductase activity) GO:0009055 (electron carrier activity) GO:0043878 (catalytic activity, oxidoreductase activity) GO:0051287 (binding, cofactor binding)
152	F7HL22	1	TLN1	Uncharacterized protein OS=Macaca mulatta GN=TLN1 PE=4 SV=1;Talin-1 OS=Macaca mulatta GN=TLN1 PE=2 SV=1;Talin-1 OS=Macaca fascicularis GN=EGM_06861 PE=4 SV=1	6.75	1.125	2.375	AIAVTVQEMVTK+AKAVEGCVSASQAATEDGQLLR+AVAEQIPLLVQGVR+AVASAAAALVLK+EADESLNFEEQILEAAK+FGQDFSTFLEAGVEMAGQAPSQEDR+GLAGAVSELLR+GTEWVDPEDPTVIAENELLGAAAAIEAAAK+ILAQATSDLVNAIK+LAQAAQSSVATITR+LNEAAAGLNQAATELVQASR+TEDSGLQTQVIAAATQCALSTSQLVACTK+TLAESALQLLYTAK+TLSHPQQMALLDQTK+TMLESAGGLIQTAR+TSALCNSCRLASAR+TVTDMLMTICAR+VAGSVTELIQAAEAMKGTE+VLGEAMTGISQNAK+VMVTNVTSLLK+VSQMAQYFEPLTLAAVGAASK+VVAPTISSPVCQEQLVEAGR	2538			GO:0007155 interaction with cells and organismsGO:0007044 cellular component organization or biogenesisGO:0030866 cellular component organization or biogenesisGO:0007016 regulationGO:0033622 cellular component organization or biogenesisGO:0007229 regulation	GO:0005856 (cytoskeleton, intracellular) GO:0005925 (other, anchoring junction) GO:0001726 (other, cell leading edge)	GO:0051015 (binding, macromolecular complex binding) GO:0005178 (binding, macromolecular complex binding) GO:0030274 (binding, protein binding) GO:0035091 (binding, ion binding) GO:0001786 (binding, ion binding) GO:0005200 (structural molecule activity, structural constituent of cytoskeleton) GO:0017166 (binding, protein binding)
153	A2AG50	1	Map7d2	MAP7 domain-containing protein 2 OS=Mus musculus GN=Map7d2 PE=1 SV=1	4.88889	0.333333	4.77778	AEHSAGKPTAGTTDAGEAAKILAEK+AEHSAGKPTAGTTDAGEAAKILAEKR+ERSGGNGGGGGGGGGGGGGYGGSGGGGGGAGVPSEGAAK+ERSGGNGGGGGGGGGGGGGYGGSGGGGGGAGVPSEGAAKGLSLLLAK+KNTPISAMGDAGKGAMAGGEPSQMEK+MERSGGNGGGGGGGGGGGGGYGGSGGGGGGAGVPSEGAAK+MERSGGNGGGGGGGGGGGGGYGGSGGGGGGAGVPSEGAAKGLSLLLAK+NTPISAMGDAGKGAMAGGEPSQMEK+RSGGNGGGGGGGGGGGGGYGGSGGGGGGAGVPSEGAAK+RSGGNGGGGGGGGGGGGGYGGSGGGGGGAGVPSEGAAKGLSLLLAK+SGGNGGGGGGGGGGGGGYGGSGGGGGGAG…				GO:0000226 cellular component organization or biogenesis	GO:0015630 (cytoskeleton, intracellular)	GO:0005198 (structural molecule activity)
154	P67778	1	Phb	Prohibitin OS=Mus musculus GN=Phb PE=1 SV=1;Prohibitin OS=Rattus norvegicus GN=Phb PE=1 SV=1;Prohibitin OS=Cricetulus griseus GN=I79_010895 PE=4 SV=1	2.64286	1.64286	1.5	AAELIANSLATAGDGLIELR+AAIISAEGDSK+DLQNVNITLR+EFTEAVEAK+FDAGELITQR+ILFRPVASQLPR+IYTSIGEDYDER+NITYLPAGQSVLLQLPQ+NVPVITGSK+QVAQQEAER+VFESIGK+VLPSITTEILK	272	Prohibitin inhibits DNA synthesis. It has a role in regulating proliferation. As yet it is unclear if the protein or the mRNA exhibits this effect. May play a role in regulating mitochondrial respiration activity and in aging (By similarity).		GO:0031100 developmental processGO:0071354 cellular processGO:0071897 cellular processGO:0016575 cellular component organization or biogenesisGO:0007005 cellular component organization or biogenesisGO:0060766 regulationGO:0043066 regulationGO:0030308 regulationGO:0008285 regulationGO:0070373 regulationGO:2000323 regulationGO:0042177 regulationGO:0010944 regulationGO:0000122 regulationGO:0045892 r…	GO:0009986 (cell surface, cell surface) GO:0005737 (cytoplasm, intracellular) GO:0005769 (endosome, endomembrane system) GO:0031315 (mitochondria, envelope) GO:0098891 (plasma membrane, cell periphery) GO:0098982 (other, GABA-ergic synapse) GO:0098978 (other, glutamatergic synapse) GO:0005887 (plasma membrane, cell periphery) GO:0030061 (mitochondria, envelope) GO:0005743 (mitochondria, envelope)…	GO:0001850 (binding, protein binding) GO:0001851 (binding, protein binding) GO:0019899 (binding, protein binding) GO:0042826 (binding, protein binding) GO:0008022 (binding, protein binding) GO:0031871 (binding, protein binding) GO:0000981 (nucleic acid binding transcription factor activity, transcription factor activity, sequence-specific DNA binding) GO:0044212 (binding, heterocyclic compound bi…
155	F6TLV2	1	HSPA9	Uncharacterized protein OS=Macaca mulatta GN=HSPA9 PE=3 SV=1;Stress-70 protein, mitochondrial OS=Macaca mulatta GN=HSPA9 PE=2 SV=1	2.875	1	7	DAGQISGLNVLR+EQQIVIQSSGGLSK+IQKGVFEVKSTNGDTFLGGEDFDQALLR+LYSPSQIGAFVLMK+NAVITVPAYFNDSQR+QAASSLQQASLK+SDIGEVILVGGMTR+SQVFSTAADGQTQVEIK+STNGDTFLGGEDFDQALLR+VEAVNMAEGIIHDTETK+VINEPTAAALAYGLDK+VQQTVQDLFGR	679			GO:0006457 cellular process		GO:0005524 (binding, carbohydrate derivative binding) GO:0051082 (binding, protein binding)
156	P11087	1	Col1a1	Collagen alpha-1(I) chain OS=Mus musculus GN=Col1a1 PE=1 SV=4	4.54545	2.36364	1.18182	DGAPGAKGDRGETGPAGPPGAPGAPGAPGPVGPAGK+EGSPGAEGSPGRDGAPGAKGDR+GANGAPGIAGAPGFPGARGPSGPQGPSGPPGPK+GDAGPPGPAGPAGPPGPIGNVGAPGPKGPR+GDAGPPGPAGPAGPPGPIGNVGAPGPKGPRGAAGPPGATGFPGAAGR+GDRGETGPAGPPGAPGAPGAPGPVGPAGK+GDTGAPGAPGSQGAPGLQGMPGERGAAGLPGPK+GDTGAPGAPGSQGAPGLQGMPGERGAAGLPGPKGDR+GEAGPPGPAGFAGPPGADGQPGAKGEPGDTGVK+GEAGPQGARGSEGPQGVRGEPGPPGPAGAAGPAGNPGADGQPGAK+GEPGDTGVKGDAGPPGPAGPAGPPGPIGNVGAPGPK+GEPGPPGP…		Type I collagen is a member of group I collagen (fibrillar forming collagen).		GO:0001568 developmental processGO:0060346 developmental processGO:0060351 developmental processGO:0071230 cellular processGO:0071364 cellular processGO:0044344 cellular processGO:1902618 cellular processGO:0071260 cellular processGO:0071300 cellular processGO:0071560 cellular processGO:0071356 cellular processGO:0071306 cellular processGO:0032964 metabolic processGO:0030199 cellular component or…	GO:0005581 (macromolecular complex, protein complex) GO:0005584 (extracellular, extracellular matrix) GO:0005737 (cytoplasm, intracellular) GO:0005783 (er, endomembrane system) GO:0031012 (extracellular, extracellular matrix) GO:0005576 (extracellular) GO:0005615 (extracellular, extracellular region part) GO:0005794 (other intracellular organelles, endomembrane system) GO:0030141 (other intracell…	GO:0005201 (structural molecule activity, extracellular matrix structural constituent) GO:0042802 (binding, protein binding) GO:0046872 (binding, ion binding) GO:0048407 (binding, protein binding) GO:0002020 (binding, protein binding)
157	F1PLS4	1	VIM	Uncharacterized protein OS=Canis familiaris GN=VIM PE=3 SV=1	3.85714	0.857143	1.5	DNLAEDIMR+EMEENFAVEAANYQDTIGR+FADLSEAANR+ILLAELEQLK+LGDLYEEEMR+LLQDSVDFSLADAINTEFK+NLQEAEEWYK+QVQSLTCEVDALK+VELQELNDR+VESLQEEIAFLK	466			GO:0014002 cellular processGO:0060020 cellular processGO:0071346 cellular processGO:0071222 cellular processGO:0071225 cellular processGO:0045109 cellular component organization or biogenesisGO:0070307 cellular processGO:0010977 regulationGO:0032967 regulationGO:0045727 regulationGO:0043488 regulationGO:0060395 regulation	GO:0031252 (other, cell leading edge) GO:0005829 (cytoplasm, intracellular) GO:0005882 (cytoskeleton, intracellular) GO:0043005 (other, cell projection) GO:0005777 (peroxisome/microbody, intracellular) GO:0045335 (endosome, intracellular) GO:0005886 (plasma membrane, cell periphery) GO:0005844 (nucleus, intracellular)	GO:0003725 (binding, heterocyclic compound binding) GO:0042802 (binding, protein binding) GO:1990254 (binding, macromolecular complex binding) GO:0008022 (binding, protein binding) GO:0019904 (binding, protein binding) GO:0097110 (binding, protein binding) GO:0005200 (structural molecule activity, structural constituent of cytoskeleton) GO:0005212 (structural molecule activity, structural constit…
158	Q80VD1	1	Fam98b	Protein FAM98B OS=Mus musculus GN=Fam98b PE=1 SV=1	1.28571	0.464286	0.821429	GGGGGGRGGWGGGGGWGGGGGSGGGWGGSGGGGGGR+GGGGGGRGGWGGGGGWGGGGGSGGGWGGSGGGGGGRGGFQGR+GGWGGGGGGRGGGGGGRGGWGGGGGWGGGGGSGGGWGGSGGGGGGR+GGWGGGGGWGGGGGSGGGWGGSGGGGGGR+GGWGGGGGWGGGGGSGGGWGGSGGGGGGRGGFQGR+GGWGGGGGWGGGGGSGGGWGGSGGGGGGRGGFQGRGDYGGR+GGYGGRGYGDPYGGGGGGGGGYRR+GYGDPYGGGGGGGGGYRR+MRGPELGPETSMEGDVLDTLEALGYKGPLLEEQALSK+QEGGGRGGWGGGGGGRGGGGGGR	429	Positively stimulates PRMT1-induced protein arginine dimethylated arginine methylation.		GO:0008284 regulationGO:0010628 regulationGO:0006479 cellular process	GO:0005737 (cytoplasm, intracellular) GO:0043231 (other intracellular organelles, intracellular) GO:0005654 (nucleus, intracellular) GO:0005634 (nucleus, intracellular) GO:0072669 (macromolecular complex, intracellular)	GO:0042802 (binding, protein binding) GO:0008276 (catalytic activity, transferase activity)
159	P18687	1	HSPD1	60 kDa heat shock protein, mitochondrial OS=Cricetulus griseus GN=HSPD1 PE=2 SV=1;60 kDa heat shock protein, mitochondrial OS=Mus musculus GN=Hspd1 PE=1 SV=1;60 kDa heat shock protein, mitochondrial OS=Rattus norvegicus GN=Hspd1 PE=1 SV=1;Heat shock protein OS=Cricetulus griseus GN=H671_2g6481 PE=3 SV=1	6.09091	0.363636	1.72727	AAVEEGIVLGGGCALLR+DPGMGAMGGMGG+GYISPYFINTSK+KDPGMGAMGGMGGGMGGGMF+LVQDVANNTNEEAGDGTTTATVLAR+NAGVEGSLIVEK+TLNDELEIIEGMK+TNEEAGDGTTTATVLAR+TVIIEQSWGSPK+VGGTSDVEVNEK	573	Chaperonin implicated in mitochondrial protein import and macromolecular assembly. Together with Hsp10, facilitates the correct folding of imported proteins. May also prevent misfolding and promote the refolding and proper assembly of unfolded polypeptides generated under stress conditions in the mitochondrial matrix. The functional units of these chaperonins consist of heptameric rings of the la…	ATP + H(2)O = ADP + phosphate.	GO:0032727 regulationGO:0032729 regulationGO:0050870 interaction with cells and organismsGO:0042026 cellular processGO:0009409 response to stimulusGO:0042110 cellular process	GO:0005737 (cytoplasm, intracellular) GO:0005759 (mitochondria, intracellular) GO:0043209 (other, myelin sheath) GO:0005886 (plasma membrane, cell periphery) GO:0032991 (macromolecular complex) GO:0030141 (other intracellular organelles, endomembrane system)	GO:0005524 (binding, carbohydrate derivative binding) GO:0016787 (catalytic activity, hydrolase activity) GO:0001530 (binding, carbohydrate derivative binding)
160	F7BGB7	1	HSPD1	Uncharacterized protein OS=Macaca mulatta GN=HSPD1 PE=3 SV=1;60 kDa heat shock protein, mitochondrial OS=Macaca mulatta GN=HSPD1 PE=2 SV=1;Macaca fascicularis brain cDNA clone: QflA-16224, similar to human heat shock 60kDa protein 1 (chaperonin) (HSPD1), nucleargene encoding mitochondrial protein, transcript variant2, mRNA, RefSeq: NM_19... OS=Macaca fascicularis PE=2 SV=1	3.25	0.75	2.5	AAVEEGIVLGGGCALLR+DPGMGAMGGMGG+GYISPYFINTSK+KDPGMGAMGGMGGGMGGGMF+LVQDVANNTNEEAGDGTTTATVLAR+NAGVEGSLIVEK+TLNDELEIIEGMK+TNEEAGDGTTTATVLAR+TVIIEQSWGSPK+VGGTSDVEVNEK	573			GO:0042026 cellular processGO:0009409 response to stimulus	GO:0005737 (cytoplasm, intracellular)	GO:0005524 (binding, carbohydrate derivative binding)
161	P39023	1	RPL3	60S ribosomal protein L3 OS=Homo sapiens GN=RPL3 PE=1 SV=2;cDNA FLJ35376 fis, clone SKMUS2004044, highly similar to Homo sapiens ribosomal protein L3 (RPL3), transcript variant 2, mRNA OS=Homo sapiens PE=2 SV=1;60S ribosomal protein L3 OS=Homo sapiens GN=RPL3 PE=1 SV=1;RPL3 protein OS=Homo sapiens GN=RPL3 PE=2 SV=1;Putative uncharacterized protein (Fragment) OS=Homo sapiens PE=2 SV=1;Ribosomal pr…	0.740741	0.888889	1.07407	ERLEQQVPVNQVFGQDEMIDVIGVTK+FIDTTSK+LEQQVPVNQVFGQDEMIDVIGVTK+VAFSVAR	403	The L3 protein is a component of the large subunit of cytoplasmic ribosomes.		GO:0071353 cellular processGO:0000184 cellular processGO:0000027 cellular component organization or biogenesisGO:0006614 localizationGO:0006412 cellular processGO:0006413 cellular process	GO:0005737 (cytoplasm, intracellular) GO:0005829 (cytoplasm, intracellular) GO:0022625 (ribosome, intracellular) GO:0070062 (extracellular, extracellular exosome) GO:0005925 (other, anchoring junction) GO:0005730 (nucleus, intracellular) GO:0005634 (nucleus, intracellular) GO:0032991 (macromolecular complex)	GO:0003723 (binding, heterocyclic compound binding) GO:0003735 (structural molecule activity, structural constituent of ribosome)
162	Q02788	1	Col6a2	Collagen alpha-2(VI) chain OS=Mus musculus GN=Col6a2 PE=1 SV=3	0.666667	3.22222	0.666667	DFDSLAQPSFFDR+GDPGPEGPRGLAGEVGSK+GQKGAKGNMGEPGEPGQK+GYQGNNGAPGSPGVKGGK+GYQGNNGAPGSPGVKGGKGGPGPR+LFAVAPNR+NFVINVVNR+NLEWIAGGTWTPSALK+QGSRGDPGDAGPRGDSGQPGPK+QNVVPTVVAVGGDVDMDVLTK		Collagen VI acts as a cell-binding protein.		GO:0007155 interaction with cells and organismsGO:0070208 cellular component organization or biogenesisGO:0009749 response to stimulus	GO:0005581 (macromolecular complex, protein complex) GO:0031012 (extracellular, extracellular matrix) GO:0005576 (extracellular) GO:0005615 (extracellular, extracellular region part) GO:0032991 (macromolecular complex) GO:0042383 (plasma membrane, cell periphery)
163	Q96Q06-2	0.9998	PLIN4	Isoform 2 of Perilipin-4 OS=Homo sapiens GN=PLIN4;Perilipin-4 OS=Homo sapiens GN=PLIN4 PE=1 SV=2;Perilipin-4 OS=Homo sapiens GN=PLIN4 PE=1 SV=1	1.58333	0.666667	0.958333	DTVCSGVTSAVNVAK+GTIQTGVDTSK+LGDLGPSFR+QRAFEHAVSHLQHGQFQAR		May play a role in triacylglycerol packaging into adipocytes. May function as a coat protein involved in the biogenesis of lipid droplets (By similarity).			GO:0005829 (cytoplasm, intracellular) GO:0043231 (other intracellular organelles, intracellular) GO:0005811 (other intracellular organelles, intracellular) GO:0005886 (plasma membrane, cell periphery)
164	Q5HZB6	0.8508	Clasrp	CLK4-associating serine/arginine rich protein OS=Rattus norvegicus GN=Clasrp PE=1 SV=2;Isoform 2 of CLK4-associating serine/arginine rich protein OS=Mus musculus GN=Clasrp;Isoform 3 of CLK4-associating serine/arginine rich protein OS=Mus musculus GN=Clasrp;CLK4-associating serine/arginine rich protein OS=Mus musculus GN=Clasrp PE=1 SV=3;Suppressor-of-white-apricot-like protein 2 OS=Mus musculus G…	3.28571	3	7	LTRPAASPAVGEK	668	Probably functions as an alternative splicing regulator. May regulate the mRNA splicing of genes such as CLK1. May act by regulating members of the CLK kinase family (By similarity).		GO:0006397 cellular processGO:0008380 cellular process	GO:0005654 (nucleus, intracellular)
165	P04642	1	Ldha	L-lactate dehydrogenase A chain OS=Rattus norvegicus GN=Ldha PE=1 SV=1;L-lactate dehydrogenase OS=Rattus norvegicus GN=Ldha PE=1 SV=1	12.1667	1.5	2	DLADELALVDVIEDK+DQLIVNLLK+EDVFLSVPCILGQNGISDVVK+FIIPNVVK+GEMMDLQHGSLFLK+LLIVSNPVDILTYVAWK+QVVDSAYEVIK+SADTLWGIQK+SLNPQLGTDADKEQWK+VIGSGCNLDSAR	332		(S)-lactate + NAD(+) = pyruvate + NADH.	GO:0005975 metabolic processGO:0006089 cellular processGO:0019674 cellular processGO:0043065 regulationGO:0048569 developmental processGO:0051591 response to stimulusGO:0042493 response to stimulusGO:0043627 response to stimulusGO:0009749 response to stimulusGO:0042542 response to stimulusGO:0001666 response to stimulusGO:0007584 response to stimulusGO:0014070 response to stimulus	GO:0005737 (cytoplasm, intracellular)	GO:0042802 (binding, protein binding) GO:0019900 (binding, protein binding) GO:0004459 (catalytic activity, oxidoreductase activity) GO:0004457 (catalytic activity, oxidoreductase activity) GO:0051287 (binding, cofactor binding)
166	O88207	1	Col5a1	Collagen alpha-1(V) chain OS=Mus musculus GN=Col5a1 PE=1 SV=2;Collagen, type V, alpha 1 OS=Mus musculus GN=Col5a1 PE=1 SV=1	1.73333	1.26667	1.93333	EGPPGEKGGQGPPGPQGPIGYPGPRGVK+GDDGEPGQTGSPGPTGEPGPSGPPGK+GDEGSRGFPGPPGPVGLQGLPGPPGEKGETGDVGQMGPPGPPGPR+GDKGEQGPPGPTGPQGPIGQPGPSGADGEPGPR+GDQGITGPSGPLGPPGPPGLPGPPGPKGAK+GDQGITGPSGPLGPPGPPGLPGPPGPKGAKGSSGPTGPK+GEDGFPGFKGDMGIKGDR+GEPGEAGDPGLPGEGGPLGPKGERGEK+GETGDVGQMGPPGPPGPRGPSGAPGADGPQGPPGGIGNPGAVGEK+GFPGDRGLPGPVGALGLKGSEGPPGPPGPAGSPGER+GHPGPPGPPGEQGLPGAAGKEGTK+GITGKPGPKGNSGGDGPAGPPGERGPNGPQGPTGFPG…		Type V collagen is a member of group I collagen (fibrillar forming collagen). It is a minor connective tissue component of nearly ubiquitous distribution. Type V collagen binds to DNA, heparan sulfate, thrombospondin, heparin, and insulin (By similarity). Transcriptionally activated by CEBPZ, which recognizes a CCAAT-like motif, CAAAT in the COL5A1 promoter.		GO:0001568 developmental processGO:0007155 interaction with cells and organismsGO:0016477 cellular processGO:0032964 metabolic processGO:0030199 cellular component organization or biogenesisGO:0048592 developmental processGO:0003007 developmental processGO:0045112 cellular component organization or biogenesisGO:1903225 regulationGO:0051128 regulationGO:0043588 developmental processGO:0097435 cell…	GO:0005604 (extracellular, extracellular matrix) GO:0005581 (macromolecular complex, protein complex) GO:0005588 (extracellular, extracellular matrix) GO:0031012 (extracellular, extracellular matrix) GO:0005615 (extracellular, extracellular region part)	GO:0005201 (structural molecule activity, extracellular matrix structural constituent) GO:0008201 (binding, carbohydrate derivative binding) GO:0048407 (binding, protein binding) GO:0043394 (binding, carbohydrate derivative binding)
167	P04937-2	1	Fn1	Isoform 2 of Fibronectin OS=Rattus norvegicus GN=Fn1;Isoform 3 of Fibronectin OS=Rattus norvegicus GN=Fn1;Isoform 4 of Fibronectin OS=Rattus norvegicus GN=Fn1;Fibronectin OS=Rattus norvegicus GN=Fn1 PE=1 SV=2;Fibronectin OS=Rattus norvegicus GN=Fn1 PE=1 SV=2;Fibronectin OS=Rattus norvegicus GN=Fn1 PE=1 SV=3	0.368421	3	0.894737	APITGYIIR+ATGVFTTLQPLR+DLQFVEVTDVK+EESPPLIGQQSTVSDVPR+EINLSPDSTSVIVSGLMVATK+EYLGAICSCTCFGGQR+FTQVSPTTLTAQWTAPSVK+HVLQSASAGSGSFTDVR+ITYGETGGNSPVQEFTVPGSK+NLQPGSEYTVTLMAVK+NTFAEVTGLSPGVTYLFK+PAQGVVTTLENVSPPR+SQTVSPDQTEMTIEGLQPTVEYVVSVYAQNR+SSPVVIDASTAIDAPSNLR+SYTITGLQPGTDYK+TETITGFQVDAIPANGQTPVQR+TYLGNALVCTCYGGSR+VDVLPVNLPGEHGQR+VEYELSEEGDEPQYLDLPSTATSVNIPDLLPGR+WLPSTSPVTGYR+YEVSVYALK+YIVNVYQISEEGK…		Anastellin binds fibronectin and induces fibril formation. This fibronectin polymer, named superfibronectin, exhibits enhanced adhesive properties. Both anastellin and superfibronectin inhibit tumor growth, angiogenesis and metastasis. Anastellin activates p38 MAPK and inhibits lysophospholipid signaling (By similarity).		GO:0006953 response to stimulusGO:0001525 developmental processGO:0001775 cellular processGO:0007160 interaction with cells and organismsGO:1904646 cellular processGO:1904385 cellular processGO:0071773 cellular processGO:0071333 regulationGO:0071347 cellular processGO:0071222 cellular processGO:0071288 cellular processGO:0036120 cellular processGO:0071380 cellular processGO:0071560 cellular proce…	GO:0005604 (extracellular, extracellular matrix) GO:0031012 (extracellular, extracellular matrix) GO:0005615 (extracellular, extracellular region part)	GO:0005201 (structural molecule activity, extracellular matrix structural constituent) GO:0008201 (binding, carbohydrate derivative binding) GO:0045340 (binding, ion binding) GO:0002020 (binding, protein binding)
168	Q8CD26	1	Slc35e1	Solute carrier family 35 member E1 OS=Mus musculus GN=Slc35e1 PE=1 SV=2	2.63636	1.63636	3.45455	AAAATAGPGAGAGVPGAGGGGGAR+AAAATAGPGAGAGVPGAGGGGGAREGAR+MAAAATAGPGAGAGVPGAGGGGGAR+MAAAATAGPGAGAGVPGAGGGGGAREGAR		Putative transporter.			GO:0005794 (other intracellular organelles, endomembrane system) GO:0016021 (other, membrane part)
169	Q91WM2	0.8759	Hdhd5	Haloacid dehalogenase-like hydrolase domain-containing 5 OS=Mus musculus GN=Hdhd5 PE=1 SV=1	1	0.647059	3.23529	ELPFHGHR+VPVVFVTNAGNILQHNK	419			GO:0046474 cellular process	GO:0005739 (mitochondria, intracellular)
170	P42932	1	Cct8	T-complex protein 1 subunit theta OS=Mus musculus GN=Cct8 PE=1 SV=3;Putative uncharacterized protein OS=Mus musculus GN=Cct8 PE=2 SV=1;Chaperonin subunit 8 (Theta), isoform CRA_a OS=Mus musculus GN=Cct8 PE=1 SV=1;MKIAA0002 protein (Fragment) OS=Mus musculus GN=Cct8 PE=2 SV=1;Chaperonin containing TCP-1 theta subunit OS=Mus musculus GN=Cctq PE=3 SV=1	1.9	0.8	0.85	AIAGTGANVIVTGGK+ANEVISK+DMLEASILDTYLGK+DVDEVSSLLR+EDGAISTIVLR+ETEGDVTSVK+FAEAFEAIPR+GSTDNLMDDIER+LATNAAVTVLR+LFVTNDAATILR+LFVTNDAATILRELEVQHPAAK+LVPGGGATEIELAK+NVGLDIEAEVPAVK+QITSYGETCPGLEQYAIK+YNIMLVR	548	Component of the chaperonin-containing T-complex (TRiC), a molecular chaperone complex that assists the folding of proteins upon ATP hydrolysis. The TRiC complex mediates the folding of WRAP53/TCAB1, thereby regulating telomere maintenance. As part of the TRiC complex may play a role in the assembly of BBSome, a complex involved in ciliogenesis regulating transports vesicles to the cilia. The TRi…		GO:0006458 cellular processGO:0007339 cellular processGO:0061077 cellular processGO:0046931 cellular component organization or biogenesisGO:1904851 regulationGO:0032212 regulationGO:0050821 regulationGO:1901998 localization	GO:0044297 (other, cell body) GO:0005813 (cytoskeleton, intracellular) GO:0005832 (macromolecular complex, intracellular) GO:0005929 (other, cell projection) GO:0005737 (cytoplasm, intracellular) GO:0005829 (cytoplasm, intracellular) GO:0045111 (cytoskeleton, intracellular) GO:0005874 (cytoskeleton, intracellular) GO:0005654 (nucleus, intracellular) GO:0002199 (macromolecular complex, protein com…	GO:0005524 (binding, carbohydrate derivative binding) GO:0044183 (binding, protein binding) GO:0051082 (binding, protein binding)
171	B1B0C7	1	Hspg2	Basement membrane-specific heparan sulfate proteoglycan core protein OS=Mus musculus GN=Hspg2 PE=1 SV=1;Basement membrane-specific heparan sulfate proteoglycan core protein OS=Mus musculus GN=Hspg2 PE=1 SV=1	1.83333	0.777778	1.11111	AAGVPSASITWR+AELLVAEAPSKPITVTVEEQR+AFAYLQVPER+AGLSSGFVGCVR+AMDFNGILTIR+CEEGVTVTTPSMSGAGSYLALPALTNMHHELR+CVVPGQAHAQVTWHK+GHTPTHPGTLNQR+GMLEPVQKPDVILVGAGYR+GMVFGIPDGVLELVPQR+GQTVTFTCVATGVPTPIINWR+IAHVELADAGQYR+IASVKPSDAGTYVCQAQNALGTAQK+IESSSSHVAEGQTLDLNCVVPGQAQVTWR+IETSSPTVTEGQTLDLNCVVVGRPQATITWYK+LEPTVPEDSGR+LGTVPQFPR+MASGYPTPAITWSK+NSQLTGGFTVEPVHDGAR+QPLVVLQGNNIVLEHHASR+SLPEVPETIEFEVR+SPGPNVAVNTK…	4375					GO:0005509 (binding, ion binding)
172	P52480	1	Pkm	Pyruvate kinase PKM OS=Mus musculus GN=Pkm PE=1 SV=4	0.714286	0.75	1.07143	AADVHEVR+AEGSDVANAVLDGADCIMLSGETAK+GDLGIEIPAEK+GIFPVLCK+GVNLPGAAVDLPAVSEK+IENHEGVR+IYVDDGLISLQVK+KAADVHEVR+KGVNLPGAAVDLPAVSEK+LAPITSDPTEAAAVGAVEASFK+LDIDSAPITAR+MQHLIAR+NTGIICTIGPASR+SGMNVAR+VNLAMDVGK		Glycolytic enzyme that catalyzes the transfer of a phosphoryl group from phosphoenolpyruvate (PEP) to ADP, generating ATP. Stimulates POU5F1-mediated transcriptional activation (By similarity).	ATP + pyruvate = ADP + phosphoenolpyruvate.	GO:0031100 developmental processGO:0006754 cellular processGO:0032869 cellular processGO:0006006 metabolic processGO:0006096 cellular processGO:0001889 developmental processGO:0012501 cellular processGO:0051289 cellular component organization or biogenesisGO:0042866 cellular processGO:0043403 developmental process	GO:0005929 (other, cell projection) GO:0005737 (cytoplasm, intracellular) GO:0005829 (cytoplasm, intracellular) GO:0031012 (extracellular, extracellular matrix) GO:0005739 (mitochondria, intracellular) GO:0043209 (other, myelin sheath) GO:0005634 (nucleus, intracellular) GO:0001917 (other, neuron part) GO:1902912 (macromolecular complex, catalytic complex)	GO:0043531 (binding, carbohydrate derivative binding) GO:0005524 (binding, carbohydrate derivative binding) GO:0042802 (binding, protein binding) GO:0016301 (catalytic activity, transferase activity) GO:0000287 (binding, ion binding) GO:0030955 (binding, ion binding) GO:0004743 (catalytic activity, transferase activity) GO:0070324 (binding, hormone binding)
173	Q5U300	1	Uba1	Ubiquitin-like modifier-activating enzyme 1 OS=Rattus norvegicus GN=Uba1 PE=1 SV=1	1.04762	1.57143	1.14286	AAVASLLQSVQVPEFTPK+AENYDISPADR+GNVQVVIPFLTESYSSSQDPPEK+IYDDDFFQNLDGVANALDNVDAR+LAGTQPLEVLEAVQR+LDQPMTEIVSR+MLQTSSVLVSGLR+QLYVLGHEAMK+SLPASLAEPDFVMTDFAK+YDGQVAVFGSDLQEK	1058	Catalyzes the first step in ubiquitin conjugation to mark cellular proteins for degradation through the ubiquitin-proteasome system. Activates ubiquitin by first adenylating its C-terminal glycine residue with ATP, and thereafter linking this residue to the side chain of a cysteine residue in E1, yielding a ubiquitin-E1 thioester and free AMP. Essential for the formation of radiation-induced foci…	ATP + ubiquitin + [E1 ubiquitin-activating enzyme]-L-cysteine = AMP + diphosphate + S-ubiquitinyl-[E1 ubiquitin-activating enzyme]-L-cysteine.	GO:0006974 cellular processGO:0006511 cellular process	GO:0005737 (cytoplasm, intracellular) GO:0005829 (cytoplasm, intracellular) GO:0030057 (other, anchoring junction) GO:0010008 (endosome, endomembrane system) GO:0000792 (chromosome, intracellular) GO:0005765 (other intracellular organelles, intracellular) GO:0005739 (mitochondria, intracellular) GO:0005654 (nucleus, intracellular) GO:0005634 (nucleus, intracellular) GO:0030867 (er, endomembrane s…	GO:0005524 (binding, carbohydrate derivative binding) GO:0004839 (catalytic activity, ligase activity)
174	P53618	1	COPB1	Coatomer subunit beta OS=Homo sapiens GN=COPB1 PE=1 SV=3	1.89474	0.789474	1.57895	DLQHPNEFIR+KEAADPLASK+LVTEMGTYATQSALSSSRPTK+NVTVQPDDPISFMQLTAK+QNSFVAEAMLLMATILHLGK+SLGEIPIVESEIK	953	The coatomer is a cytosolic protein complex that binds to dilysine motifs and reversibly associates with Golgi non-clathrin-coated vesicles, which further mediate biosynthetic protein transport from the ER, via the Golgi up to the trans Golgi network. Coatomer complex is required for budding from Golgi membranes, and is essential for the retrograde Golgi-to-ER transport of dilysine-tagged protein…		GO:0006888 localizationGO:0006891 localizationGO:0006886 localizationGO:0043312 cellular processGO:0006890 localizationGO:0016032 cellular process	GO:0030126 (other intracellular organelles, endomembrane system) GO:0005829 (cytoplasm, intracellular) GO:0005789 (er, endomembrane system) GO:0005793 (er, intracellular) GO:0101003 (other intracellular organelles, endomembrane system) GO:0005794 (other intracellular organelles, endomembrane system) GO:0000139 (other intracellular organelles, endomembrane system) GO:0005798 (other intracellular o…	GO:0005198 (structural molecule activity)
175	Q9Y6M4-2	0.9992	CSNK1G3	Isoform 2 of Casein kinase I isoform gamma-3 OS=Homo sapiens GN=CSNK1G3;Isoform 3 of Casein kinase I isoform gamma-3 OS=Homo sapiens GN=CSNK1G3;Isoform 4 of Casein kinase I isoform gamma-3 OS=Homo sapiens GN=CSNK1G3;Casein kinase I isoform gamma-3 OS=Homo sapiens GN=CSNK1G3 PE=1 SV=2	3.375	3.875	4.125	DVKPENFLIGRPGNK+GTGSSSSGVLMVGPNFR+NLYTNEYVAIK+QLGSGDGIPQVYYFGPCGK+RLDFFEKPDYDYLRK		Serine/threonine-protein kinase. Casein kinases are operationally defined by their preferential utilization of acidic proteins such as caseins as substrates. It can phosphorylate a large number of proteins. Participates in Wnt signaling. Regulates fast synaptic transmission mediated by glutamate (By similarity).	ATP + a protein = ADP + a phosphoprotein.	GO:0006464 cellular processGO:0006897 localizationGO:0018105 cellular processGO:0008360 regulationGO:0007165 regulationGO:0016055 regulation	GO:0005737 (cytoplasm, intracellular) GO:0005634 (nucleus, intracellular)	GO:0005524 (binding, carbohydrate derivative binding) GO:0004672 (catalytic activity, transferase activity) GO:0004674 (catalytic activity, transferase activity)
176	P09382	1	LGALS1	Galectin-1 OS=Homo sapiens GN=LGALS1 PE=1 SV=2	2.44444	1.05556	1.11111	DSNNLCLHFNPR+FNAHGDANTIVCNSK+GEVAPDAK+SFVLNLGK	135	Lectin that binds beta-galactoside and a wide array of complex carbohydrates. Plays a role in regulating apoptosis, cell proliferation and cell differentiation. Inhibits CD45 protein phosphatase activity and therefore the dephosphorylation of Lyn kinase. Strong inducer of T-cell apoptosis.		GO:0006915 cellular processGO:0044267 cellular processGO:0071333 regulationGO:0071407 cellular processGO:0045445 cellular processGO:0010812 interaction with cells and organismsGO:0010977 regulationGO:0002317 cellular processGO:0034120 interaction with cells and organismsGO:0043123 regulationGO:0046598 regulationGO:0043687 cellular processGO:0042981 regulationGO:0048678 response to stimulusGO:0042…	GO:0009986 (cell surface, cell surface) GO:0005737 (cytoplasm, intracellular) GO:0005829 (cytoplasm, intracellular) GO:0005788 (er, endomembrane system) GO:0070062 (extracellular, extracellular exosome) GO:0005576 (extracellular) GO:0005615 (extracellular, extracellular region part) GO:0005622 (other, intracellular) GO:0005634 (nucleus, intracellular)	GO:0030395 (binding, carbohydrate binding) GO:0043236 (binding, extracellular matrix binding) GO:0042803 (binding, protein binding) GO:0003723 (binding, heterocyclic compound binding)
177	P16402	1	HIST1H1D	Histone H1.3 OS=Homo sapiens GN=HIST1H1D PE=1 SV=2	7.71429	3.85714	0.857143	ALAAAGYDVEK+ASGPPVSELITK+MSETAPLAPTIPAPAE	221	Histone H1 protein binds to linker DNA between nucleosomes forming the macromolecular structure known as the chromatin fiber. Histones H1 are necessary for the condensation of nucleosome chains into higher-order structured fibers. Acts also as a regulator of individual gene transcription through chromatin remodeling, nucleosome spacing and DNA methylation (By similarity).		GO:0098532 cellular component organization or biogenesisGO:0080182 cellular component organization or biogenesisGO:0000122 regulationGO:0006334 cellular component organization or biogenesisGO:0016584 cellular component organization or biogenesis	GO:0000790 (chromosome, intracellular) GO:0005719 (chromosome, intracellular) GO:0000786 (chromosome, intracellular)	GO:0031490 (binding, chromatin binding) GO:0003723 (binding, heterocyclic compound binding)
178	P29314	1	Rps9	40S ribosomal protein S9 OS=Rattus norvegicus GN=Rps9 PE=1 SV=4;40S ribosomal protein S9 OS=Mus musculus GN=Rps9 PE=1 SV=3	2.72727	2.36364	2	HIDFSLR+IEDFLER+IGVLDEGK+LFEGNALLR+LIGEYGLR+QVVNIPSFIVR	194			GO:0045903 regulationGO:0006412 cellular process	GO:0022627 (ribosome, intracellular) GO:1990904 (nucleus, ribonucleoprotein complex)	GO:1990932 (binding, heterocyclic compound binding) GO:0003735 (structural molecule activity, structural constituent of ribosome)
179	F7HAN9	1	HIST1H1E	Histone H1b OS=Macaca mulatta GN=HIST1H1E PE=3 SV=1;Uncharacterized protein OS=Macaca mulatta GN=HIST1H1C PE=3 SV=1;Histone H1.3 OS=Macaca mulatta GN=HIST1H1D PE=2 SV=1;Histone H1d OS=Macaca mulatta GN=EGK_14544 PE=3 SV=1;Histone H1d OS=Macaca fascicularis GN=EGM_13301 PE=3 SV=1;Histone H1b OS=Macaca fascicularis GN=EGM_13307 PE=3 SV=1;Histone H1c OS=Macaca fascicularis GN=EGM_13318 PE=3 SV=1;His…	7.71429	3.85714	0.857143	ALAAAGYDVEK+ASGPPVSELITK	219			GO:0006334 cellular component organization or biogenesis	GO:0005720 (chromosome, intracellular) GO:0000786 (chromosome, intracellular)	GO:0031490 (binding, chromatin binding)
180	E2RRD2	1		Uncharacterized protein OS=Canis familiaris PE=3 SV=2;Uncharacterized protein (Fragment) OS=Canis familiaris PE=3 SV=2;Uncharacterized protein OS=Canis familiaris GN=HIST1H1C PE=3 SV=2;Uncharacterized protein OS=Canis familiaris GN=HIST1H1E PE=3 SV=1	7.71429	3.85714	0.857143	ALAAAGYDVEK+ASGPPVSELITK	218			GO:0006334 cellular component organization or biogenesis	GO:0000786 (chromosome, intracellular) GO:0005634 (nucleus, intracellular)	GO:0003677 (binding, heterocyclic compound binding)
181	A0A1U7QSX8	1	Lmna	lamin OS=Mesocricetus auratus GN=Lmna PE=3 SV=1	1.15789	1.36842	1.73684	IDSLSAQLSQLQK+MQQQLDEYQELLDIK+NSNLVGAAHEELQQSR+TVLCGTCGQP	663			GO:0071456 cellular processGO:0030951 cellular component organization or biogenesisGO:1903243 regulationGO:2001237 regulationGO:0072201 regulationGO:0090201 regulationGO:0006998 cellular component organization or biogenesisGO:0090343 regulationGO:0010628 regulationGO:0006606 localizationGO:0030334 regulationGO:1900180 regulationGO:0055015 cellular process	GO:0005638 (nucleus, intracellular) GO:0031965 (nucleus, endomembrane system) GO:0005654 (nucleus, intracellular)	GO:0005198 (structural molecule activity)
182	O75369-2	1	FLNB	Isoform 2 of Filamin-B OS=Homo sapiens GN=FLNB;Isoform 3 of Filamin-B OS=Homo sapiens GN=FLNB;Isoform 6 of Filamin-B OS=Homo sapiens GN=FLNB;Isoform 8 of Filamin-B OS=Homo sapiens GN=FLNB;Isoform 9 of Filamin-B OS=Homo sapiens GN=FLNB;Filamin-B OS=Homo sapiens GN=FLNB PE=1 SV=2;Filamin B, beta (Actin binding protein 278), isoform CRA_a OS=Homo sapiens GN=FLNB PE=4 SV=1	1.32	1.04	0.64	AGLAPLEVR+AGPGTLSVTIEGPSK+GAGIGGLGITVEGPSESK+IGNLQTDLSDGLR+LDVTILSPSR+LLGWIQNK+QMQLENVSVALEFLDR+SPFTVGVAAPLDLSK+VQAQGPGLK+VSYFPTVPGVYIVSTK		Connects cell membrane constituents to the actin cytoskeleton. May promote orthogonal branching of actin filaments and links actin filaments to membrane glycoproteins. Anchors various transmembrane proteins to the actin cytoskeleton. Interaction with FLNA may allow neuroblast migration from the ventricular zone into the cortical plate. Various interactions and localizations of isoforms affect myo…		GO:0030036 cellular component organization or biogenesisGO:0071346 cellular processGO:0007016 regulationGO:0003382 cellular component organization or biogenesisGO:0003334 cellular processGO:0007165 regulationGO:0007519 developmental process	GO:0015629 (cytoskeleton, intracellular) GO:0005903 (other, cluster of actin-based cell projections) GO:0005938 (cytoplasm, cell periphery) GO:0005737 (cytoplasm, intracellular) GO:0005829 (cytoplasm, intracellular) GO:0070062 (extracellular, extracellular exosome) GO:0005925 (other, anchoring junction) GO:0016021 (other, membrane part) GO:0045335 (endosome, intracellular) GO:0005886 (plasma memb…	GO:0003779 (binding, protein binding) GO:0045296 (binding, protein binding) GO:0042802 (binding, protein binding) GO:0003723 (binding, heterocyclic compound binding)
183	P22071	1	Hsd3b1	3 beta-hydroxysteroid dehydrogenase/Delta 5--)4-isomerase type 1 OS=Rattus norvegicus GN=Hsd3b1 PE=2 SV=3	1.15	1.45	1.4	DLGYVPLVSWEEAK+FSIANPVYVGNVAWAH+GTQNILEACVEASVPAFIY+GTQNILEACVEASVPAFIYCSTVDVAGPNSYK+QTILDVNLK+SQNVQGQFYYISDDTPHQSYDDLNCTLSK+VTMLEGDILDAQYLR+YISDDTPHQSYDDLNCTLSK	373	3-beta-HSD is a bifunctional enzyme, that catalyzes the oxidative conversion of Delta(5)-ene-3-beta-hydroxy steroid, and the oxidative conversion of ketosteroids. The 3-beta-HSD enzymatic system plays a crucial role in the biosynthesis of all classes of hormonal steroids.	A 3-oxo-Delta(5)-steroid = a 3-oxo-Delta(4)-steroid.	GO:0030325 developmental processGO:0018879 cellular processGO:0008207 regulationGO:0071236 cellular processGO:0071320 cellular processGO:0071549 cellular processGO:0044344 cellular processGO:0071372 cellular processGO:0071333 regulationGO:0071371 cellular processGO:0070301 cellular processGO:0032869 cellular processGO:0071373 cellular processGO:0071288 cellular processGO:0071406 cellular processG…	GO:0005789 (er, endomembrane system) GO:0016021 (other, membrane part) GO:0043231 (other intracellular organelles, intracellular) GO:0030061 (mitochondria, envelope)	GO:0003854 (catalytic activity, oxidoreductase activity) GO:0035410 (catalytic activity, oxidoreductase activity) GO:0051287 (binding, cofactor binding) GO:0005496 (binding, lipid binding) GO:0004769 (catalytic activity, isomerase activity)
184	P40925-3	1	MDH1	Isoform 3 of Malate dehydrogenase, cytoplasmic OS=Homo sapiens GN=MDH1;Malate dehydrogenase, cytoplasmic OS=Homo sapiens GN=MDH1 PE=1 SV=4;Malate dehydrogenase OS=Homo sapiens GN=HEL-S-32 PE=2 SV=1	1.3	1	1.1	DLDVAILVGSMPR+DVIATDK+EVGVYEALK+FVEGLPINDFSR+LGVTANDVK+LSSAMSAAK+SQGAALDK+VIVVGNPANTNCLTASK			3-(3,5-diiodo-4-hydroxyphenyl)lactate + NAD(+) = 3-(3,5-diiodo-4-hydroxyphenyl)pyruvate + NADH.	GO:0006094 metabolic processGO:0006108 cellular processGO:0006734 cellular processGO:0006107 cellular processGO:0006099 cellular process	GO:0005829 (cytoplasm, intracellular) GO:0070062 (extracellular, extracellular exosome) GO:0005615 (extracellular, extracellular region part) GO:0005739 (mitochondria, intracellular) GO:0043209 (other, myelin sheath)	GO:0047860 (catalytic activity, oxidoreductase activity) GO:0030060 (catalytic activity, oxidoreductase activity) GO:0004470 (catalytic activity, oxidoreductase activity) GO:0051287 (binding, cofactor binding)
185	P05787-2	1	KRT8	Isoform 2 of Keratin, type II cytoskeletal 8 OS=Homo sapiens GN=KRT8;Keratin, type II cytoskeletal 8 OS=Homo sapiens GN=KRT8 PE=1 SV=7	3	3.375	3.25	AAIADAEQRGELAIKDANAK+AEIEGLK+AQYEDIANR+EYQELMNVK+FASFIDK+LEGLTDEINFLR+LEVDPNIQAVR+LQAEIEGLK+LYEEEIR+PNIQAVR+SELEAALQR+SNMDNMFESYINNLR+YEDEINKR		Together with KRT19, helps to link the contractile apparatus to dystrophin at the costameres of striated muscle.		GO:0060706 cellular processGO:0070268 cellular processGO:0097191 regulationGO:0097284 cellular processGO:0031424 cellular processGO:0051599 response to stimulusGO:0051707 response to stimulusGO:0045214 cellular component organization or biogenesisGO:0033209 regulationGO:0016032 cellular process	GO:0016327 (plasma membrane, cell periphery) GO:0005911 (other, cell-cell junction) GO:0043034 (other intracellular organelles, intracellular) GO:0005737 (cytoplasm, intracellular) GO:0005829 (cytoplasm, intracellular) GO:0016010 (plasma membrane, cell periphery) GO:0070062 (extracellular, extracellular exosome) GO:0005882 (cytoskeleton, intracellular) GO:0045111 (cytoskeleton, intracellular) GO:…	GO:0044877 (binding, macromolecular complex binding) GO:0097110 (binding, protein binding) GO:0005198 (structural molecule activity)
186	A0A097BW25	1	Postn	Periostin OS=Rattus norvegicus GN=Postn PE=1 SV=1;Periostin OS=Rattus norvegicus GN=Postn PE=1 SV=1	3.2	0.8	1.66667	AAAITSDLLESLGR+DLLTQPGDWTLFAPTNDAFK+DQGPNVCALQQILGTK+ESDIMTTNGVIHVVDK+GFEPGVTNILK+LLYPADIPVGNDQLLEILNK+TTVLYECCPGYMR+VGLSDLYNGQILETIGGK+VLTQIGTSIQDFIEAEDELSSFR	783			GO:1990523 developmental processGO:0044344 cellular processGO:0071560 cellular processGO:0071356 cellular processGO:0001953 interaction with cells and organismsGO:1900025 interaction with cells and organismsGO:1990138 cellular component organization or biogenesisGO:1904209 regulationGO:0014911 regulationGO:0003073 regulationGO:0032355 response to stimulusGO:0001666 response to stimulusGO:0009612 …	GO:0005737 (cytoplasm, intracellular) GO:0031012 (extracellular, extracellular matrix) GO:0005615 (extracellular, extracellular region part) GO:0031594 (other, neuromuscular junction)
187	P54868-2	1	HMGCS2	Isoform 2 of Hydroxymethylglutaryl-CoA synthase, mitochondrial OS=Homo sapiens GN=HMGCS2;Hydroxymethylglutaryl-CoA synthase, mitochondrial OS=Homo sapiens GN=HMGCS2 PE=1 SV=1	2.1875	1.0625	1.0625	LEVGTETIIDK+LSIQCYLR+VNFSPPGDTNSLFPGTWYLER+YTVGLGQTR		This enzyme condenses acetyl-CoA with acetoacetyl-CoA to form HMG-CoA, which is the substrate for HMG-CoA reductase.	Acetyl-CoA + H(2)O + acetoacetyl-CoA = (S)-3-hydroxy-3-methylglutaryl-CoA + CoA.	GO:0006695 metabolic processGO:0008299 cellular processGO:0046951 cellular processGO:0019216 regulation	GO:0005759 (mitochondria, intracellular) GO:0005739 (mitochondria, intracellular)	GO:0004421 (catalytic activity, transferase activity)
188	Q30D77	1	Col24a1	Collagen alpha-1(XXIV) chain OS=Mus musculus GN=Col24a1 PE=2 SV=2	1.46154	1.38462	3.07692	EGIIGPTGGTGPRGEKGFR+GATGQQGPPGEPGDQGGQGPKGER+GATGQQGPPGEPGDQGGQGPKGERGSEGPQGK+GAVGPLGLMGPEGEPGIPGYR+GDGGPAGSAGATGEPGPRGEPGAPGEEGLQGK+GDPGLLGLVGPPGLQGAKGLKGHPGLPGLR+GDPGPPGPPGPMGIPGPSGK+GDPGPPGPPGPMGIPGPSGKRGPR+GEMGLPGTAGPVGRPGQMGLPGPEGIVGTPGQRGR+GEPGAPGEEGLQGKDGLKGAPGGSGLPGEDGDK+GETGPQGPRGQPGPPGPPGAPGPRR+GHLGNRGPPGPPGLKGTQGEEGPIGPFGELGSR+GHMGVPGLRGATGQQGPPGEPGDQGGQGPK+GLPGIAGLPGEMGVEGPPGTEGDSGLQG…	1733	Involved in osteoblast differentiation.		GO:0002244 cellular process	GO:0005581 (macromolecular complex, protein complex) GO:0005576 (extracellular)	GO:0005201 (structural molecule activity, extracellular matrix structural constituent)
189	P00338-3	1	LDHA	Isoform 3 of L-lactate dehydrogenase A chain OS=Homo sapiens GN=LDHA;L-lactate dehydrogenase A chain OS=Homo sapiens GN=LDHA PE=1 SV=2;L-lactate dehydrogenase OS=Homo sapiens GN=HEL-S-133P PE=2 SV=1	2.90909	2.27273	2.09091	DLADELALVDVIEDK+FIIPNVVK+GEMMDLQHGSLFLR+LIIVSNPVDILTYVAWK+LVIITAGAR+QVVESAYEVIK+SADTLWGIQK+VIGSGCNLDSAR			(S)-lactate + NAD(+) = pyruvate + NADH.	GO:0006096 cellular processGO:0006089 cellular processGO:0019674 cellular processGO:0043065 regulationGO:0048569 developmental processGO:0006090 cellular processGO:0051591 response to stimulusGO:0043627 response to stimulusGO:0009749 response to stimulusGO:0042542 response to stimulusGO:0001666 response to stimulusGO:0007584 response to stimulusGO:0021762 developmental process	GO:0005829 (cytoplasm, intracellular) GO:0070062 (extracellular, extracellular exosome) GO:0016020 (other) GO:0005634 (nucleus, intracellular)	GO:0045296 (binding, protein binding) GO:0042802 (binding, protein binding) GO:0019900 (binding, protein binding) GO:0004459 (catalytic activity, oxidoreductase activity) GO:0051287 (binding, cofactor binding)
190	Q63870	1	Col7a1	Collagen alpha-1(VII) chain OS=Mus musculus GN=Col7a1 PE=1 SV=3	0.909091	0.909091	1.54545	AGGPGDPGEDGQKGAPGLK+DGLPGLRGEHGPPGPPGPPGVPGKAGDDGKPGLNGK+DGSSGKDGDRGSPGVPGSPGLPGPVGPK+EEGPPVVIVARTDPLGPVRR+EGAPGPLGPPGPPGSAGAPGASGLK+EGAPGPLGPPGPPGSAGAPGASGLKGDK+EGAPGPLGPPGPPGSAGAPGASGLKGDKGDPGAGLPGPR+GAPGLKGLKGEPGIGVQGPPGPSGPPGMK+GASGSKGEQGAPGLALPGDPGPK+GDCEDGGPGLPGQPGPPGEPGLRGAPGMTGPK+GDPGPSGPPGSRGPVGDPGPR+GDRGERGPPGPGIGASEQGDPGLPGLPGSPGPQGPAGRPGEK+GEAGLPGPR+GEKGEPGRPGDPAVGPGGAGAK+GEPGAAGIPGEP…	2944	Stratified squamous epithelial basement membrane protein that forms anchoring fibrils which may contribute to epithelial basement membrane organization and adherence by interacting with extracellular matrix (ECM) proteins such as type IV collagen.		GO:0007155 interaction with cells and organismsGO:0035987 cellular process	GO:0005604 (extracellular, extracellular matrix) GO:0005581 (macromolecular complex, protein complex) GO:0005576 (extracellular)	GO:0042802 (binding, protein binding) GO:0004867 (molecular function regulator, enzyme regulator activity)
191	P15864	1	Hist1h1c	Histone H1.2 OS=Mus musculus GN=Hist1h1c PE=1 SV=2;Histone cluster 1, H1c OS=Mus musculus GN=Hist1h1c PE=1 SV=1	3.83333	2.16667	0.583333	ALAAAGYDVEK+ASGPPVSELITK+MSEAAPAAPAAAPPAEK	212	Histone H1 protein binds to linker DNA between nucleosomes forming the macromolecular structure known as the chromatin fiber. Histones H1 are necessary for the condensation of nucleosome chains into higher-order structured fibers. Acts also as a regulator of individual gene transcription through chromatin remodeling, nucleosome spacing and DNA methylation (By similarity).		GO:0098532 cellular component organization or biogenesisGO:0080182 cellular component organization or biogenesisGO:0000122 regulationGO:0006334 cellular component organization or biogenesisGO:0016584 cellular component organization or biogenesisGO:0006357 regulation	GO:0005719 (chromosome, intracellular) GO:0000786 (chromosome, intracellular) GO:0005634 (nucleus, intracellular) GO:0035327 (chromosome, intracellular)	GO:0031490 (binding, chromatin binding) GO:0003677 (binding, heterocyclic compound binding)
192	P62908	1	Rps3	40S ribosomal protein S3 OS=Mus musculus GN=Rps3 PE=1 SV=1;40S ribosomal protein S3 OS=Rattus norvegicus GN=Rps3 PE=1 SV=1;Putative uncharacterized protein OS=Mus musculus GN=Rps3 PE=2 SV=1;Putative uncharacterized protein OS=Mus musculus GN=Rps3 PE=1 SV=1;Putative uncharacterized protein OS=Mus musculus GN=Rps3 PE=2 SV=1	3.25	2.33333	1.25	AELNEFLTR+DEILPTTPISEQK+ELAEDGYSGVEVR+FGFPEGSVELYAEK+FIMESGAK+GLCAIAQAESLR+IMLPWDPSGK+LLGGLAVR+TQNVLGEK	243	Involved in translation as a component of the 40S small ribosomal subunit (By similarity). Has endonuclease activity and plays a role in repair of damaged DNA (PubMed:7775413). Cleaves phosphodiester bonds of DNAs containing altered bases with broad specificity and cleaves supercoiled DNA more efficiently than relaxed DNA (By similarity). Displays high binding affinity for 7,8-dihydro-8-oxoguanin…	The C-O-P bond 3' to the apurinic or apyrimidinic site in DNA is broken by a beta-elimination reaction, leaving a 3'-terminal unsaturated sugar and a product with a terminal 5'-phosphate.	GO:0006915 cellular processGO:0051301 cellular processGO:0006974 cellular processGO:0070301 cellular processGO:1990090 cellular processGO:0071356 cellular processGO:0007059 cellular processGO:0002181 cellular processGO:0042769 cellular processGO:0006281 cellular processGO:0045738 regulationGO:0031397 regulationGO:0017148 regulationGO:0042104 interaction with cells and organismsGO:2001235 regulati…	GO:0005737 (cytoplasm, intracellular) GO:0005829 (cytoplasm, intracellular) GO:0022627 (ribosome, intracellular) GO:0030425 (other, cell projection) GO:0012505 (other, endomembrane system) GO:0005783 (er, endomembrane system) GO:0005743 (mitochondria, envelope) GO:0005759 (mitochondria, intracellular) GO:0072686 (cytoskeleton, intracellular) GO:0071159 (macromolecular complex, intracellular) GO:0…	GO:0003684 (binding, heterocyclic compound binding) GO:0003677 (binding, heterocyclic compound binding) GO:0003906 (catalytic activity, hydrolase activity) GO:0004520 (catalytic activity, hydrolase activity) GO:0019899 (binding, protein binding) GO:0030544 (binding, protein binding) GO:0051879 (binding, protein binding) GO:0019900 (binding, protein binding) GO:0008017 (binding, protein binding) G…
193	P16546-2	1	Sptan1	Isoform 2 of Spectrin alpha chain, non-erythrocytic 1 OS=Mus musculus GN=Sptan1;Spectrin alpha chain, non-erythrocytic 1 OS=Mus musculus GN=Sptan1 PE=1 SV=4;Spectrin alpha chain, non-erythrocytic 1 OS=Mus musculus GN=Sptan1 PE=1 SV=1;Spectrin alpha chain, non-erythrocytic 1 OS=Mus musculus GN=Sptan1 PE=1 SV=1;Spectrin alpha chain, non-erythrocytic 1 OS=Mus musculus GN=Sptan1 PE=1 SV=2;Spna2 prote…	2.75	1.1875	1	ALCAEADR+ALINADELANDVAGAEALLDR+DLASVQALLR+DLIGVQNLLK+DLSSVQTLLTK+EAIVTSEELGQDLEHVEVLQK+EKLDILDQERTDLEK+GDSLDSVEALIK+GVIDMGNSLIER+LDPAQSASR+LEESLEYQQFVANVEEEEAWINEK+LFGAAEVQR+LLVSSEDYGR+LQVASDENYKDPTNLQGK+MQHNLEQQIQAR+NQALNTDNYGHDLASVQALQR+NTTGVTEEALK+QEAFLLNEDLGDSLDSVEALLK+QETFDAGLQAFQQEGIANITALK+QETFDAGLQAFQQEGIANITALKDQLLAAK+QGFVPAAYVK		Fodrin, which seems to be involved in secretion, interacts with calmodulin in a calcium-dependent manner and is thus candidate for the calcium-dependent movement of the cytoskeleton at the membrane.		GO:0031532 cellular component organization or biogenesisGO:0051693 regulation	GO:0030863 (cytoskeleton, cell periphery) GO:0032437 (cytoskeleton, cell periphery) GO:0005916 (other, anchoring junction) GO:0043231 (other intracellular organelles, intracellular) GO:0016328 (plasma membrane, cell periphery) GO:0016020 (other) GO:0015630 (cytoskeleton, intracellular) GO:0043209 (other, myelin sheath) GO:0033270 (other, cell projection) GO:0005886 (plasma membrane, cell peripher…	GO:0003779 (binding, protein binding) GO:0005509 (binding, ion binding) GO:0005516 (binding, protein binding) GO:0046982 (binding, protein binding) GO:0044877 (binding, macromolecular complex binding) GO:0030507 (binding, protein binding) GO:0019905 (binding, protein binding)
194	D0G7D9	1	COL6A3	Collagen type VI alpha 3 subunit OS=Mesocricetus auratus GN=COL6A3 PE=2 SV=1	11.75	5	7.5	IASNSATAFR+ISLSPEYVFSVSTFR+KALEFVARNLFVK+LNLLDLDYELAEQLDNIAEK+SNDVFPEFYLK+VAVVTYNNEVTTEIR+VPQIAFVITGGK	2675				GO:0005581 (macromolecular complex, protein complex)	GO:0004867 (molecular function regulator, enzyme regulator activity)
195	Q61245	1	Col11a1	Collagen alpha-1(XI) chain OS=Mus musculus GN=Col11a1 PE=1 SV=2	1.82353	1.94118	1.11765	GAPGEKGPQGPAGRDGVQGPVGLPGPAGPAGSPGEDGDK+GARGPTGKPGPKGTSGGDGPPGPPGER+GDGGIPGPAGPIGPPGPPGLPGPAGPKGNK+GDKGENGPPGPPGLQGPVGAPGIAGGDGEPGPR+GDKGENGPPGPPGLQGPVGAPGIAGGDGEPGPRGQQGMFGQK+GEAGPPGAAGPAGIKGPPGDDGPK+GEAGPPGAAGPAGIKGPPGDDGPKGNPGPVGFPGDPGPPGEPGPAGQDGVGGDK+GEDGFPGFKGDMGIKGDR+GEKGEAGPPGAAGPAGIKGPPGDDGPK+GENGDVGPMGPPGPPGPR+GENGDVGPMGPPGPPGPRGPQGPNGADGPQGPPGSIGSVGVVGDK+GENGPPGPPGLQGPVGAPGIAGGDGEPGPR+…		May play an important role in fibrillogenesis by controlling lateral growth of collagen II fibrils.		GO:0001502 cell aggregationGO:0051216 developmental processGO:0002063 cellular processGO:0030199 cellular component organization or biogenesisGO:0050910 interaction with cells and organismsGO:0048704 developmental processGO:0035987 cellular processGO:0003007 developmental processGO:0042472 developmental processGO:0001503 interaction with cells and organismsGO:0006029 cellular processGO:0007605 in…	GO:0005581 (macromolecular complex, protein complex) GO:0005592 (extracellular, extracellular matrix) GO:0031012 (extracellular, extracellular matrix) GO:0005615 (extracellular, extracellular region part)	GO:0005201 (structural molecule activity, extracellular matrix structural constituent) GO:1904399 (binding, carbohydrate derivative binding) GO:0008201 (binding, carbohydrate derivative binding) GO:0046872 (binding, ion binding)
196	P32089	0.9989	Slc25a1	Tricarboxylate transport protein, mitochondrial OS=Rattus norvegicus GN=Slc25a1 PE=1 SV=1;Tricarboxylate transport protein, mitochondrial OS=Mus musculus GN=Slc25a1 PE=1 SV=1	3.11111	6.11111	0.888889	FFVMTSLR+FGMFEFLSNHMR+FIHDQTSSNPK+GFFHGVR+GLSSLLYGSIPK+GTYQGLTATVLK	311	Involved in citrate-H(+)/malate exchange. Important for the bioenergetics of hepatic cells as it provides a carbon source for fatty acid and sterol biosyntheses, and NAD(+) for the glycolytic pathway.		GO:0006843 localizationGO:0006839 localization	GO:0016021 (other, membrane part) GO:0005743 (mitochondria, envelope)	GO:0015137 (transporter, substrate-specific transporter activity)
197	P21980	1	TGM2	Protein-glutamine gamma-glutamyltransferase 2 OS=Homo sapiens GN=TGM2 PE=1 SV=2;cDNA FLJ58187, highly similar to Protein-glutamine gamma-glutamyltransferase 2(EC 2.3.2.13) OS=Homo sapiens PE=2 SV=1;Epididymis secretory protein Li 45 OS=Homo sapiens GN=HEL-S-45 PE=2 SV=1	1.5	0.5	0.607143	DLYLENPEIK+SVPLCILYEK+VVSGMVNCNDDQGVLLGR+VVTNYNSAHDQNSNLLIEYFR+YPEGSSEER		Catalyzes the cross-linking of proteins and the conjugation of polyamines to proteins.	A protein-L-glutamine + a protein-L-lysine = a protein with an N(6)-(gamma-glutamyl)-L-lysine cross-link + NH(3).	GO:0043277 localizationGO:0001974 interaction with cells and organismsGO:0060445 developmental processGO:0018153 cellular processGO:0032471 regulationGO:0043065 regulationGO:0045785 interaction with cells and organismsGO:0051482 regulationGO:0043123 regulationGO:0050729 regulationGO:0051561 regulationGO:0048661 regulationGO:0051260 cellular component organization or biogenesisGO:0060662 developme…	GO:0005829 (cytoplasm, intracellular) GO:0005783 (er, endomembrane system) GO:0070062 (extracellular, extracellular exosome) GO:0005925 (other, anchoring junction) GO:0031226 (plasma membrane, cell periphery) GO:0005739 (mitochondria, intracellular)	GO:0005525 (binding, carbohydrate derivative binding) GO:0046872 (binding, ion binding) GO:0019904 (binding, protein binding) GO:0003810 (catalytic activity, transferase activity)
198	P16104	0.9246	H2AFX	Histone H2AX OS=Homo sapiens GN=H2AFX PE=1 SV=2;Histone H2A type 1-A OS=Homo sapiens GN=HIST1H2AA PE=1 SV=3	17	11.6667	3.33333	AGLQFPVGR+HLQLAIRNDEELNKLLGGVTIAQGGVLPNIQAVLLPK+LLGGVTIAQGGVLPNIQAVLLPK	143	Variant histone H2A which replaces conventional H2A in a subset of nucleosomes. Nucleosomes wrap and compact DNA into chromatin, limiting DNA accessibility to the cellular machineries which require DNA as a template. Histones thereby play a central role in transcription regulation, DNA repair, DNA replication and chromosomal stability. DNA accessibility is regulated via a complex set of post-tran…		GO:0006974 cellular processGO:0071480 cellular processGO:0090398 cellular processGO:0021987 developmental processGO:0006342 regulationGO:0000077 regulationGO:0006302 cellular processGO:0000724 cellular processGO:0006303 cellular processGO:0051321 cellular processGO:0006334 cellular component organization or biogenesisGO:0045739 regulationGO:0010212 response to stimulusGO:0007283 interaction with …	GO:0005813 (cytoskeleton, intracellular) GO:0000794 (chromosome, intracellular) GO:0070062 (extracellular, extracellular exosome) GO:0001673 (nucleus, intracellular) GO:0000790 (chromosome, intracellular) GO:0016607 (nucleus, intracellular) GO:0005654 (nucleus, intracellular) GO:0000786 (chromosome, intracellular) GO:0005634 (nucleus, intracellular) GO:0005657 (chromosome, intracellular) GO:00358…	GO:0003684 (binding, heterocyclic compound binding) GO:0003677 (binding, heterocyclic compound binding) GO:0019899 (binding, protein binding) GO:0042393 (binding, protein binding) GO:0046982 (binding, protein binding)
199	Q64057	1	Aldh7a1	Alpha-aminoadipic semialdehyde dehydrogenase OS=Rattus norvegicus GN=Aldh7a1 PE=1 SV=2	2.52941	1	1.41176	AWNIWADIPAPK+GAPTTSLVSIAVTK+GSDCGIVNVNIPTSGAEIGGAFGGEK+QAVSMFVQAVEEAK+QGLSSSIFTK+QVALMVQER+STCTINYSTALPLAQGIK+VGNPWDPNILYGPLHTK+VMDHPGNYVEPTIVTGLVHDAPIVHK+VNLLSFTGSTQVGK	539	Multifunctional enzyme mediating important protective effects. Metabolizes betaine aldehyde to betaine, an important cellular osmolyte and methyl donor. Protects cells from oxidative stress by metabolizing a number of lipid peroxidation-derived aldehydes. Involved in lysine catabolism (By similarity).	An aldehyde + NAD(+) + H(2)O = a carboxylate + NADH.	GO:0019285 cellular process	GO:0005829 (cytoplasm, intracellular) GO:0005739 (mitochondria, intracellular) GO:0005634 (nucleus, intracellular)	GO:0008802 (catalytic activity, oxidoreductase activity) GO:0043878 (catalytic activity, oxidoreductase activity) GO:0004043 (catalytic activity, oxidoreductase activity)
200	P02541	1	DES	Desmin OS=Mesocricetus auratus GN=DES PE=2 SV=2;Desmin OS=Mesocricetus auratus GN=Des PE=2 SV=1	2.66667	2.41667	2.25	DGEVVSEATQQQHEVL+ELQAQLQEQQVQVEMDMSKPDLTAALR+FASEASGYQDNIAR+FLEQQNAALAAEVNR+HQIQSYTCEIDALK+IESLNEEIAFLK+MALDVEIATYR+NISEAEEWYK+VELQELNDR	469	Muscle-specific type III intermediate filament essential for proper muscular structure and function. Plays a crucial role in maintaining the structure of sarcomeres, inter-connecting the Z-disks and forming the myofibrils, linking them not only to the sarcolemmal cytoskeleton, but also to the nucleus and mitochondria, thus providing strength for the muscle fiber during activity. In adult striated…		GO:0045109 cellular component organization or biogenesis	GO:0097512 (other intracellular organelles, intracellular) GO:0005737 (cytoplasm, intracellular) GO:0005916 (other, anchoring junction) GO:0014704 (other, cell-cell junction) GO:0005882 (cytoskeleton, intracellular) GO:0031594 (other, neuromuscular junction) GO:0005634 (nucleus, intracellular) GO:0042383 (plasma membrane, cell periphery) GO:0030018 (other intracellular organelles, intracellular)	GO:0008092 (binding, protein binding) GO:0042802 (binding, protein binding) GO:0005198 (structural molecule activity)
201	P18206-2	1	VCL	Isoform 1 of Vinculin OS=Homo sapiens GN=VCL;Vinculin OS=Homo sapiens GN=VCL PE=1 SV=4;Vinculin, isoform CRA_c OS=Homo sapiens GN=VCL PE=4 SV=1;Epididymis luminal protein 114 OS=Homo sapiens GN=HEL114 PE=2 SV=1	1.6875	1.1875	2.375	AAAVGTANK+AASDELSK+AIPDLTAPVAAVQAAVSNLVR+ALASQLQDSLK+AQQVSQGLDVLTAK+AVAGNISDPGLQK+DLLAAAK+ELTPQVVSAAR+GNDIIAAAKR+KLEAMTNSK+LANVMMGPYR+LVQAAQMLQSDPYSVPAR+MLGQMTDQVADLR+MTGLVDEAIDTK+TNISDEESEQATEMLVHNAQNLMQSVK+VAMANIQPQMLVAGATSIAR+VLQLTSWDEDAWASK+VMLVNSMNTVK+WIDNPTVDDR		Actin filament (F-actin)-binding protein involved in cell-matrix adhesion and cell-cell adhesion. Regulates cell-surface E-cadherin expression and potentiates mechanosensing by the E-cadherin complex. May also play important roles in cell morphology and locomotion.		GO:0034333 cellular component organization or biogenesisGO:0043297 cellular component organization or biogenesisGO:0048675 cellular component organization or biogenesisGO:0007155 interaction with cells and organismsGO:0007160 interaction with cells and organismsGO:0090136 interaction with cells and organismsGO:0030032 cellular component organization or biogenesisGO:0002009 developmental processGO…	GO:0005912 (other, anchoring junction) GO:0005903 (other, cluster of actin-based cell projections) GO:0005623 (other) GO:0005913 (other, anchoring junction) GO:0005911 (other, cell-cell junction) GO:0030055 (other, cell-substrate junction) GO:0043034 (other intracellular organelles, intracellular) GO:0005856 (cytoskeleton, intracellular) GO:0005829 (cytoplasm, intracellular) GO:0070062 (extracell…	GO:0003779 (binding, protein binding) GO:0045294 (binding, protein binding) GO:0008013 (binding, protein binding) GO:0045296 (binding, protein binding) GO:0002162 (binding, carbohydrate derivative binding) GO:0005198 (structural molecule activity) GO:0031625 (binding, protein binding)
202	P08133-2	1	ANXA6	Isoform 2 of Annexin A6 OS=Homo sapiens GN=ANXA6;Annexin A6 OS=Homo sapiens GN=ANXA6 PE=1 SV=3;Annexin OS=Homo sapiens PE=2 SV=1	1.71429	1.92857	1.85714	DLEADIIGDTSGHFQK+DLIADLK+LIVGLMRPPAYCDAK+LVFDEYLK+MLVVLLQGTR+MTNYDVEHTIK+PEYFAER+SEIDLLNIR+SELDMLDIR+TNEQMHQLVAAYK		May associate with CD21. May regulate the release of Ca(2+) from intracellular stores.		GO:0097190 regulationGO:0006816 localizationGO:0034220 localizationGO:0051560 regulationGO:0051260 cellular component organization or biogenesisGO:0006937 regulation	GO:0070062 (extracellular, extracellular exosome) GO:0005925 (other, anchoring junction) GO:0031902 (endosome, endomembrane system) GO:0005765 (other intracellular organelles, intracellular) GO:0042470 (other intracellular organelles, intracellular) GO:0016020 (other) GO:0005739 (mitochondria, intracellular) GO:0048471 (nucleus, intracellular)	GO:0005509 (binding, ion binding) GO:0005544 (binding, ion binding) GO:0048306 (binding, protein binding) GO:0015485 (binding, lipid binding) GO:0005525 (binding, carbohydrate derivative binding) GO:0015276 (molecular transducer activity, receptor activity) GO:0008289 (binding, lipid binding) GO:0042803 (binding, protein binding)
203	O08553	1	Dpysl2	Dihydropyrimidinase-related protein 2 OS=Mus musculus GN=Dpysl2 PE=1 SV=2;Dihydropyrimidinase-related protein 2 OS=Rattus norvegicus GN=Dpysl2 PE=1 SV=1	4.625	6	0.875	DNFTLIPEGTNGTEER+GIQEEMEALVK+GTVVYGEPITASLGTDGSHYWSK+ILDLGITGPEGHVLSRPEEVEAEAVNR+ISVGSDADLVIWDPDSVK+IVLEDGTLHVTEGSGR+MDENQFVAVTSTNAAK+MSVIWDK+NLHQSGFSLSGAQIDDNIPRR+QIGENLIVPGGVK+SAAEVIAQAR+SITIANQTNCPLYVTK+THNSALEYNIFEGMECR+VFNLYPR	572	Plays a role in neuronal development and polarity, as well as in axon growth and guidance, neuronal growth cone collapse and cell migration. Necessary for signaling by class 3 semaphorins and subsequent remodeling of the cytoskeleton. May play a role in endocytosis.		GO:0007411 cellular component organization or biogenesisGO:0007010 cellular component organization or biogenesisGO:0006897 localizationGO:0021772 developmental processGO:0014049 regulationGO:0030516 regulationGO:0045664 regulationGO:0010975 regulationGO:0001975 response to stimulusGO:0042220 response to stimulusGO:0021510 developmental processGO:0048489 localization	GO:0030424 (other, cell projection) GO:0005856 (cytoskeleton, intracellular) GO:0005829 (cytoplasm, intracellular) GO:0030425 (other, cell projection) GO:0030426 (other, cell projection) GO:0005739 (mitochondria, intracellular) GO:0043209 (other, myelin sheath) GO:0043005 (other, cell projection) GO:0043025 (other, cell body) GO:0005886 (plasma membrane, cell periphery) GO:0032991 (macromolecular…	GO:0016810 (catalytic activity, hydrolase activity) GO:0042802 (binding, protein binding) GO:0008017 (binding, protein binding) GO:0019901 (binding, protein binding)
204	Q66HF1	1	Ndufs1	NADH-ubiquinone oxidoreductase 75 kDa subunit, mitochondrial OS=Rattus norvegicus GN=Ndufs1 PE=1 SV=1	2.8125	2	0.375	ALSEIAGITLPYDTLDQVR+DDGAAILAAVSSIAQK+DFYMTDSISR+FASEIAGVDDLGTTGR+FEAPLFNAR+GWNILTNSEK+IASQVAALDLGYKPGVEAIR+KPMVVLGSSALQR+LVDQEFLADPLVPPQLTIK+SATYVNTEGR+SNYLLNTTIAGVEEADVVLLVGTNPR+VAGMLQSFEGK+VALIGSPVDLTYR+VAVTPPGLAR+VDSDTLCTEEIFPNEGAGTDLR+VGMQIPR+YDDVEEANYFQQASELAK	727	Core subunit of the mitochondrial membrane respiratory chain NADH dehydrogenase (Complex I) that is believed to belong to the minimal assembly required for catalysis. Complex I functions in the transfer of electrons from NADH to the respiratory chain. The immediate electron acceptor for the enzyme is believed to be ubiquinone (By similarity). This is the largest subunit of complex I and it is a c…	NADH + acceptor = NAD(+) + reduced acceptor.	GO:0008637 cellular component organization or biogenesisGO:0046034 cellular processGO:0042773 cellular processGO:0045333 cellular processGO:0072593 cellular processGO:0051881 regulation	GO:0005758 (mitochondria, envelope) GO:0005747 (mitochondria, envelope) GO:0043209 (other, myelin sheath)	GO:0051537 (binding, metal cluster binding) GO:0051539 (binding, metal cluster binding) GO:0009055 (electron carrier activity) GO:0051536 (binding, metal cluster binding) GO:0046872 (binding, ion binding) GO:0008137 (catalytic activity, oxidoreductase activity)
205	P50137	1	Tkt	Transketolase OS=Rattus norvegicus GN=Tkt PE=1 SV=1;Transketolase OS=Rattus norvegicus GN=Tkt PE=1 SV=1	10.75	9	4.25	GHAAPILYAVWAEAGFLPEAELLNLR+IIALDGDTK+ILATPPQEDAPSVDIANIR+LAVSQVPR+LGQSDPAPLQHQVDVYQK+MFGIDKDAIVQAVK+NMAEQIIQEIYSQVQSK+SVPMSTVFYPSDGVATEK+TGIEDKEAWHGKPLPK+TSRPENAIIYSNNEDFQVGQAK		Catalyzes the transfer of a two-carbon ketol group from a ketose donor to an aldose acceptor, via a covalent intermediate with the cofactor thiamine pyrophosphate.	Sedoheptulose 7-phosphate + D-glyceraldehyde 3-phosphate = D-ribose 5-phosphate + D-xylulose 5-phosphate.	GO:0006098 cellular processGO:0009052 cellular processGO:0046390 cellular process	GO:0005789 (er, endomembrane system) GO:0043231 (other intracellular organelles, intracellular) GO:0005777 (peroxisome/microbody, intracellular)	GO:0030246 (binding, carbohydrate binding) GO:0000287 (binding, ion binding) GO:0048029 (binding, carbohydrate binding) GO:0030976 (binding, cofactor binding) GO:0004802 (catalytic activity, transferase activity)
206	A6H584	1	Col6a5	Collagen alpha-5(VI) chain OS=Mus musculus GN=Col6a5 PE=1 SV=4;Collagen alpha-5(VI) chain OS=Mus musculus GN=Col6a5 PE=1 SV=1;Collagen alpha-5(VI) chain OS=Mus musculus GN=Col6a5 PE=1 SV=1	0.4	2.45	1.2	ADIMFLVDSSGSIGPTNFETMKTFMK+ADVGRDRVQIGALTYSNHPEILFYLNTYSSGSAIAEHLR+CPGIPGPHGTRGLQASK+CQGYVVFVISLGSTQR+GEPGVPGGPGPVGPPGQR+GEPGVPGGPGPVGPPGQRGK+GPTGFPGDPGQKGDAGNPGIPGGPGPK+IEAGENELSGDSGSQEQHFFLLGNSHGNHSESTADLMR+KGEPGVPGGPGPVGPPGQR+KGEPGVPGGPGPVGPPGQRGK+LIAFVLILWTETLADQSPGPGPEYADVVFLVDSSNYLGIK+TFLNRMISSLPIEANK+VIFIVTAGETNPLDKEVLR	2640	Collagen VI acts as a cell-binding protein.		GO:0007155 interaction with cells and organisms	GO:0005581 (macromolecular complex, protein complex) GO:0031012 (extracellular, extracellular matrix) GO:0005576 (extracellular)
207	Q6URW6-2	0.9898	Myh14	Isoform 2 of Myosin-14 OS=Mus musculus GN=Myh14;Isoform 3 of Myosin-14 OS=Mus musculus GN=Myh14;Myosin-14 OS=Mus musculus GN=Myh14 PE=1 SV=1;Myosin-14 OS=Mus musculus GN=Myh14 PE=1 SV=1	1.5	2.07143	2.57143	EDQSILCTGESGAGK+EQADFAIEALAK+GLEAEVLR+LAEQLRAEAELCSEAEETR+LALGSRVRALEAEAAGLR+QLLQANPILEAFGNAK+TPNVGGPGGPQVEWTARR		Cellular myosin that appears to play a role in cytokinesis, cell shape, and specialized functions such as secretion and capping.		GO:0030048 cellular processGO:0031032 cellular component organization or biogenesisGO:0070584 cellular component organization or biogenesisGO:0019228 regulationGO:0008360 regulationGO:0007605 interaction with cells and organismsGO:0003009 interaction with cells and organismsGO:0007519 developmental processGO:0071625 behavior	GO:0042641 (cytoskeleton, intracellular) GO:0030424 (other, cell projection) GO:0005903 (other, cluster of actin-based cell projections) GO:0005737 (cytoplasm, intracellular) GO:0030426 (other, cell projection) GO:0043209 (other, myelin sheath) GO:0016459 (cytoskeleton, intracellular) GO:0016460 (cytoskeleton, intracellular) GO:0097513 (cytoskeleton, intracellular) GO:0001725 (cytoskeleton, intra…	GO:0051015 (binding, macromolecular complex binding) GO:0030898 (catalytic activity, hydrolase activity) GO:0005524 (binding, carbohydrate derivative binding) GO:0016887 (catalytic activity, hydrolase activity) GO:0005516 (binding, protein binding) GO:0000146 (catalytic activity, hydrolase activity)
208	P14824	1	Anxa6	Annexin A6 OS=Mus musculus GN=Anxa6 PE=1 SV=3;Annexin OS=Mus musculus GN=Anxa6 PE=2 SV=1;Annexin OS=Mus musculus GN=Anxa6 PE=2 SV=1	6.36364	1	0.636364	ALLALCGGED+DLIEDLK+DQAQEDAQVAAEILEIADTPSGDK+ENDDVVSEDLVQQDVQDLYEAGELK+GELSGDFEK+IAQGAMYR+ILISLATGNR+KTNYDIEHVIK+KTNYDIEHVIKK+LVFDEYLK+SEIDLLNIR+SELDMLDIR+SLHQAIEGDTSGDFMK+TNEQMHQLVAAYK+TNYDIEHVIK	673	May associate with CD21. May regulate the release of Ca(2+) from intracellular stores.		GO:0097190 regulationGO:0006816 localizationGO:0034220 localizationGO:0051560 regulationGO:0051260 cellular component organization or biogenesisGO:0006937 regulation	GO:0016324 (plasma membrane, apical part of cell) GO:0005737 (cytoplasm, intracellular) GO:0005829 (cytoplasm, intracellular) GO:0014704 (other, cell-cell junction) GO:0031902 (endosome, endomembrane system) GO:0005765 (other intracellular organelles, intracellular) GO:0042470 (other intracellular organelles, intracellular) GO:0005739 (mitochondria, intracellular) GO:0005634 (nucleus, intracellul…	GO:0005509 (binding, ion binding) GO:0005544 (binding, ion binding) GO:0048306 (binding, protein binding) GO:0015485 (binding, lipid binding) GO:0005525 (binding, carbohydrate derivative binding) GO:0015276 (molecular transducer activity, receptor activity) GO:0008289 (binding, lipid binding) GO:0042803 (binding, protein binding) GO:0044877 (binding, macromolecular complex binding)
209	P78371-2	1	CCT2	Isoform 2 of T-complex protein 1 subunit beta OS=Homo sapiens GN=CCT2;T-complex protein 1 subunit beta OS=Homo sapiens GN=CCT2 PE=1 SV=4;Chaperonin containing TCP1, subunit 2 (Beta), isoform CRA_b OS=Homo sapiens GN=HEL-S-100n PE=2 SV=1	2.875	4.75	3.25	AAHSEGNTTAGLDMR+DASLMVTNDGATILK+LAVEAVLR+LGGSLADSYLDEGFLLDK+NIGVDNPAAK+VQDDEVGDGTTSVTVLAAELLR		Component of the chaperonin-containing T-complex (TRiC), a molecular chaperone complex that assists the folding of proteins upon ATP hydrolysis (PubMed:25467444). The TRiC complex mediates the folding of WRAP53/TCAB1, thereby regulating telomere maintenance (PubMed:25467444). As part of the TRiC complex may play a role in the assembly of BBSome, a complex involved in ciliogenesis regulating trans…		GO:0007339 cellular processGO:0051086 cellular processGO:0051131 cellular component organization or biogenesisGO:0043312 cellular processGO:1904851 regulationGO:1904871 regulationGO:0051973 regulationGO:1904874 regulationGO:0032212 regulationGO:0006457 cellular processGO:0050821 regulationGO:0090666 localizationGO:1901998 localization	GO:0035578 (other intracellular organelles, endomembrane system) GO:0044297 (other, cell body) GO:0005832 (macromolecular complex, intracellular) GO:0005829 (cytoplasm, intracellular) GO:0070062 (extracellular, extracellular exosome) GO:0005576 (extracellular) GO:0005874 (cytoskeleton, intracellular) GO:0043209 (other, myelin sheath) GO:0002199 (macromolecular complex, protein complex)	GO:0005524 (binding, carbohydrate derivative binding) GO:0044183 (binding, protein binding) GO:0031625 (binding, protein binding) GO:0051082 (binding, protein binding)
210	P31430	1	Dpep1	Dipeptidase 1 OS=Rattus norvegicus GN=Dpep1 PE=2 SV=2	7.625	1.625	2.375	AGFVGGQFWSAYMPCDTQNK+NVPDDVLQLVK+VFSAVELVSNIMQVPEEETIPVEK	410	Hydrolyzes a wide range of dipeptides. Implicated in the renal metabolism of glutathione and its conjugates. Converts leukotriene D4 to leukotriene E4; it may play an important role in the regulation of leukotriene activity.	Hydrolysis of dipeptides.	GO:0016999 cellular processGO:0071277 cellular processGO:0035690 cellular processGO:0071732 cellular processGO:0050667 cellular processGO:0043066 regulationGO:0030336 regulationGO:0043154 regulation	GO:0031225 (other, membrane part) GO:0045177 (other, apical part of cell) GO:0016324 (plasma membrane, apical part of cell) GO:0030054 (other) GO:0005615 (extracellular, extracellular region part) GO:0031528 (plasma membrane, cell periphery) GO:0005634 (nucleus, intracellular) GO:0005886 (plasma membrane, cell periphery)	GO:0043027 (molecular function regulator, enzyme regulator activity) GO:0016805 (catalytic activity, hydrolase activity) GO:0008239 (catalytic activity, hydrolase activity) GO:0034235 (binding, carbohydrate derivative binding) GO:0070573 (catalytic activity, hydrolase activity) GO:0072341 (binding, modified amino acid binding) GO:0008270 (binding, ion binding)
211	F7AG82	1	COL6A3	Uncharacterized protein OS=Macaca mulatta GN=COL6A3 PE=4 SV=1;Uncharacterized protein OS=Macaca mulatta GN=EGK_04932 PE=4 SV=1;Putative uncharacterized protein OS=Macaca fascicularis GN=EGM_04440 PE=4 SV=1;Collagen alpha-3(VI) chain isoform 4 OS=Macaca mulatta GN=COL6A3 PE=2 SV=1	11.75	5	7.5	GLDGEDGDKGLPGSSGEKGNPGR+IASNSATAFR+LNLLDLDYELAEQLDNIAEK+NADPAELEQIVLSPAFILAAESLPK+SNDVFPEFYLK+SPAFILAAESLPK+VAVVTYNNEVTTEIR+VPQIAFVITGGK	2969					GO:0004867 (molecular function regulator, enzyme regulator activity)
212	P54071	1	Idh2	Isocitrate dehydrogenase [NADP], mitochondrial OS=Mus musculus GN=Idh2 PE=1 SV=3	1.61111	2.05556	0.833333	CATITPDEAR+DQTNDQVTIDSALATQK+GRPTSTNPIASIFAWTR+ILWQFLK+LIDDMVAQVLK+NILGGTVFR+NILGGTVFREPIICK+NYDGDVQSDILAQGFGSLGLMTSVLVCPDGK+VCVQTVESGAMTK+VEKPVVEMDGDEMTR+YFDLGLPNR		Plays a role in intermediary metabolism and energy production. It may tightly associate or interact with the pyruvate dehydrogenase complex.	Isocitrate + NADP(+) = 2-oxoglutarate + CO(2) + NADPH.	GO:0006103 cellular processGO:0006097 cellular processGO:0006102 cellular processGO:0006741 cellular processGO:1903976 regulationGO:0060253 regulationGO:1904465 regulationGO:0006099 cellular process	GO:0005829 (cytoplasm, intracellular) GO:0005743 (mitochondria, envelope) GO:0005739 (mitochondria, intracellular) GO:0005777 (peroxisome/microbody, intracellular)	GO:0004450 (catalytic activity, oxidoreductase activity) GO:0004448 (catalytic activity, oxidoreductase activity) GO:0000287 (binding, ion binding) GO:0051287 (binding, cofactor binding)
213	P14152	1	Mdh1	Malate dehydrogenase, cytoplasmic OS=Mus musculus GN=Mdh1 PE=1 SV=3	1.3	1	1.1	DLDVAVLVGSMPR+ELTEEKETAFEFLSSA+EVGVYEALK+FVEGLPINDFSR+LGVTADDVK+SQGTALEK+VIVVGNPANTNCLTASK	334		(S)-malate + NAD(+) = oxaloacetate + NADH.	GO:0005975 metabolic processGO:0006108 cellular processGO:0019674 cellular processGO:0006734 cellular processGO:0006107 cellular processGO:0006099 cellular process	GO:0005829 (cytoplasm, intracellular) GO:0005739 (mitochondria, intracellular) GO:0043209 (other, myelin sheath)	GO:0030060 (catalytic activity, oxidoreductase activity) GO:0016615 (catalytic activity, oxidoreductase activity) GO:0051287 (binding, cofactor binding)
214	F1PR31	1	COL6A3	Uncharacterized protein OS=Canis familiaris GN=COL6A3 PE=4 SV=2;Uncharacterized protein OS=Canis familiaris GN=COL6A3 PE=4 SV=2;Uncharacterized protein OS=Canis familiaris GN=COL6A3 PE=4 SV=1;Collagen, type VI, alpha 3 OS=Canis familiaris GN=col6a3 PE=4 SV=1	11.75	5	7.5	GLDGEDGDKGLPGSSGEKGNPGR+IASNSATAFR+KALEFVARNLFVK+LNLLDLDYELAEQLDNIAEK+VAVVTYNNEVTTEIR+VPQIAFVITGGK	3161				GO:0005581 (macromolecular complex, protein complex) GO:0031012 (extracellular, extracellular matrix) GO:0005615 (extracellular, extracellular region part) GO:0042383 (plasma membrane, cell periphery)	GO:0004867 (molecular function regulator, enzyme regulator activity)
215	A7VJC2-2	1	Hnrnpa2b1	Isoform A2 of Heterogeneous nuclear ribonucleoproteins A2/B1 OS=Rattus norvegicus GN=Hnrnpa2b1;Isoform A2b of Heterogeneous nuclear ribonucleoproteins A2/B1 OS=Rattus norvegicus GN=Hnrnpa2b1;Isoform B1b of Heterogeneous nuclear ribonucleoproteins A2/B1 OS=Rattus norvegicus GN=Hnrnpa2b1;Heterogeneous nuclear ribonucleoproteins A2/B1 OS=Rattus norvegicus GN=Hnrnpa2b1 PE=1 SV=1;Isoform 2 of Heteroge…	2.58333	2.25	2.08333	DYFEEYGK+EESGKPGAHVTVK+GGGGNFGPGPGSNFR+IDTIEIITDR+KIFVGGIKEDTEEHHLR+NMGGPYGGGNYGPGGSGGSGGYGGR+NYYEQWGK+QEMQEVQSSR+SGKPGAHVTVK+VGGIKEDTEEHHLR		Heterogeneous nuclear ribonucleoprotein (hnRNP) that associates with nascent pre-mRNAs, packaging them into hnRNP particles. The hnRNP particle arrangement on nascent hnRNA is non-random and sequence-dependent and serves to condense and stabilize the transcripts and minimize tangling and knotting. Packaging plays a role in various processes such as transcription, pre-mRNA processing, RNA nuclear …		GO:0044806 cellular component organization or biogenesisGO:0030324 developmental processGO:0008584 developmental processGO:1990428 localizationGO:0006406 localizationGO:0000398 cellular processGO:0048709 cellular processGO:1905663 regulationGO:1904358 regulationGO:0031053 regulationGO:0051385 response to stimulusGO:0050658 localizationGO:0016233 regulation	GO:0015030 (nucleus, intracellular) GO:0000785 (chromosome, intracellular) GO:0000781 (chromosome, intracellular) GO:0005737 (cytoplasm, intracellular) GO:0070062 (extracellular, extracellular exosome) GO:0043005 (other, cell projection) GO:0043025 (other, cell body) GO:0071598 (nucleus, cell projection) GO:0016363 (nucleus, intracellular) GO:0005634 (nucleus, intracellular) GO:0043204 (other, ce…	GO:0070182 (binding, protein binding) GO:0098505 (binding, heterocyclic compound binding) GO:0035198 (binding, heterocyclic compound binding) GO:0003730 (binding, heterocyclic compound binding) GO:1990715 (binding, heterocyclic compound binding) GO:1990247 (binding, heterocyclic compound binding) GO:0001069 (binding, heterocyclic compound binding) GO:0003723 (binding, heterocyclic compound bindin…
216	Q61984	0.9995	NMDA2C	N-methyl-D-aspartate receptor subunit NR2C OS=Mus musculus GN=NMDA2C PE=3 SV=1	2.46667	1.26667	1.8	GSNTVVAAAILPGGLCGGR+MGGALGPALLLTSLLGAWAGLGAGQGEQAVTVAVVFGSSGPLQAQAR+MGGALGPALLLTSLLGAWAGLGAGQGEQAVTVAVVFGSSGPLQAQARTR+RPAAARAGTAGSAGGSAAR+RPAAARAGTAGSAGGSAARGLGQGPAPSAR+WGPHPASAPGPAASR+WGPHPASAPGPAASRSPR	1203			GO:0007626 behaviorGO:0050804 regulationGO:0048167 regulation	GO:0030054 (other) GO:0016021 (other, membrane part) GO:0045211 (plasma membrane, cell periphery)	GO:0004970 (molecular transducer activity, receptor activity)
217	O09161	0.9999	Casq2	Calsequestrin-2 OS=Mus musculus GN=Casq2 PE=1 SV=3;Calsequestrin-2 OS=Rattus norvegicus GN=Casq2 PE=1 SV=2;Calsequestrin OS=Mus musculus GN=Casq2 PE=2 SV=1;Calsequestrin OS=Rattus norvegicus GN=Casq2 PE=1 SV=2;Calsequestrin OS=Mus musculus GN=Casq2 PE=1 SV=1	1.875	2.3125	1.0625	FFATFDK+LEVQAFER+VVSLSEK	415	Calsequestrin is a high-capacity, moderate affinity, calcium-binding protein and thus acts as an internal calcium store in muscle. Calcium ions are bound by clusters of acidic residues at the protein surface, especially at the interface between subunits. Can bind around 60 Ca(2+) ions. Regulates the release of lumenal Ca(2+) via the calcium release channel RYR2; this plays an important role in tr…		GO:0060048 interaction with cells and organismsGO:0071313 cellular processGO:1901017 regulationGO:0043267 regulationGO:0060315 regulationGO:0051258 cellular component organization or biogenesisGO:0086004 regulationGO:0010881 regulationGO:0010649 regulationGO:0002027 regulationGO:0060306 regulationGO:0006937 regulationGO:0010880 regulationGO:0045214 cellular component organization or biogenesisGO:…	GO:0005737 (cytoplasm, intracellular) GO:0005622 (other, intracellular) GO:0030314 (macromolecular complex, intracellular) GO:0016529 (er, endomembrane system) GO:0033018 (er, endomembrane system) GO:0030018 (other intracellular organelles, intracellular)	GO:0005509 (binding, ion binding) GO:0048306 (binding, protein binding) GO:0042803 (binding, protein binding) GO:0005080 (binding, protein binding)
218	G3HA23	1	I79_007263	Malate dehydrogenase OS=Cricetulus griseus GN=I79_007263 PE=3 SV=1	3.66667	0.733333	0.8	AGAGSATLSMAYAGAR+ETECTYFSTPLLLGK+FVFSLVDAMNGK+GCDVVVIPAGVPR+IFGVTTLDIVR+TIIPLISQCTPK+VAVLGASGGIGQPLSLLLK+VDFPQDQLTALTGR	271		(S)-malate + NAD(+) = oxaloacetate + NADH.	GO:0005975 metabolic processGO:0006108 cellular processGO:0006099 cellular process		GO:0030060 (catalytic activity, oxidoreductase activity)
219	P25444	1	Rps2	40S ribosomal protein S2 OS=Mus musculus GN=Rps2 PE=1 SV=3;40S ribosomal protein S2 (Fragment) OS=Mus musculus GN=Rps2 PE=1 SV=1;40S ribosomal protein S2 OS=Mus musculus GN=Rps2 PE=1 SV=1;Uncharacterized protein OS=Mus musculus GN=Rps2 PE=2 SV=1;Uncharacterized protein OS=Mus musculus GN=Rps2 PE=2 SV=1;Uncharacterized protein OS=Mus musculus GN=Rps2 PE=2 SV=1;Uncharacterized protein OS=Mus muscul…	1.7	0.95	1.35	ADDAGAAGGPGGPGGPGLGGR+CSKEVATAIRGAIILAK+LIPAPRGTGIVSAPVPKK+LLMMAGIDDCYTSAR+MADDAGAAGGPGGPGGPGLGGR+MADDAGAAGGPGGPGGPGLGGRGGFR+MADDAGAAGGPGGPGGPGLGGRGGFRGGFGSGLR+VTGRCGSVLVRLIPAPR				GO:0071353 cellular processGO:0001731 cellular component organization or biogenesisGO:0051443 regulationGO:0000028 cellular component organization or biogenesisGO:0006412 cellular process	GO:0022627 (ribosome, intracellular) GO:0005654 (nucleus, intracellular) GO:1990904 (nucleus, ribonucleoprotein complex)	GO:0019899 (binding, protein binding) GO:0017134 (binding, protein binding) GO:0003729 (binding, heterocyclic compound binding) GO:0044877 (binding, macromolecular complex binding) GO:0003735 (structural molecule activity, structural constituent of ribosome)
220	Q68FQ0	1	Cct5	T-complex protein 1 subunit epsilon OS=Rattus norvegicus GN=Cct5 PE=1 SV=1	2.81818	1.54545	3.72727	AFADALEVIPMALSENSGMNPIQTMTEVR+GSNDMQYQHVIETLIGK+GSNDMQYQHVIETLIGKK+IADGYEQAAR+ISDNVLVDINNPEPLIQTAK+LDVTSVEDYK+LGFAGVVR		Component of the chaperonin-containing T-complex (TRiC), a molecular chaperone complex that assists the folding of proteins upon ATP hydrolysis. The TRiC complex mediates the folding of WRAP53/TCAB1, thereby regulating telomere maintenance. As part of the TRiC complex may play a role in the assembly of BBSome, a complex involved in ciliogenesis regulating transports vesicles to the cilia. The TRi…		GO:0006458 cellular processGO:0007339 cellular processGO:0061077 cellular processGO:1901998 localization	GO:0044297 (other, cell body) GO:0005832 (macromolecular complex, intracellular) GO:0005815 (cytoskeleton, intracellular) GO:0043209 (other, myelin sheath) GO:0002199 (macromolecular complex, protein complex)	GO:0005524 (binding, carbohydrate derivative binding) GO:0031681 (binding, protein binding) GO:0044183 (binding, protein binding) GO:0051082 (binding, protein binding)
221	P35564	1	Canx	Calnexin OS=Mus musculus GN=Canx PE=1 SV=1;Calnexin OS=Rattus norvegicus GN=Canx PE=1 SV=1;Putative uncharacterized protein OS=Mus musculus GN=Canx PE=2 SV=1;Calnexin, isoform CRA_a OS=Mus musculus GN=Canx PE=1 SV=1	2.6	0.733333	2.33333	APVPTGEVYFADSFDR+EEEEEEK+GSLSGWILSK+HHAISAK+RPDADLK+TGVYEEK+TPYTIMFGPDK+TYFTDKK+VVDDWANDGWGLK+WKPPMIDNPNYQGIWKPR	591	Calcium-binding protein that interacts with newly synthesized glycoproteins in the endoplasmic reticulum. It may act in assisting protein assembly and/or in the retention within the ER of unassembled protein subunits. It seems to play a major role in the quality control apparatus of the ER by the retention of incorrectly folded proteins. Associated with partial T-cell antigen receptor complexes t…		GO:0007568 developmental processGO:0061077 cellular processGO:0072583 localizationGO:0048488 localization	GO:0030424 (other, cell projection) GO:0005737 (cytoplasm, intracellular) GO:0032839 (cytoplasm, cell projection) GO:0043197 (other, cell projection) GO:0005783 (er, endomembrane system) GO:0005789 (er, endomembrane system) GO:0044322 (er, endomembrane system) GO:0044233 (mitochondria, organelle part) GO:0098978 (other, glutamatergic synapse) GO:0071556 (er, endomembrane system) GO:0016021 (other…	GO:0034185 (binding, protein binding) GO:0005509 (binding, ion binding) GO:0030246 (binding, carbohydrate binding) GO:0035255 (binding, protein binding) GO:0051082 (binding, protein binding)
222	P00405	0.9981	Mtco2	Cytochrome c oxidase subunit 2 OS=Mus musculus GN=Mtco2 PE=1 SV=1;Cytochrome c oxidase subunit 2 OS=Rattus norvegicus GN=Mtco2 PE=1 SV=3;Cytochrome c oxidase subunit 2 OS=Mus musculus musculus GN=COX2 PE=3 SV=1;Cytochrome c oxidase subunit 2 OS=Mus musculus castaneus GN=COX2 PE=3 SV=1;Cytochrome c oxidase subunit 2 OS=Mus musculus GN=COX2 PE=3 SV=1;Cytochrome c oxidase subunit 2 OS=Mus caroli GN=…	2.69231	2.30769	1	ILYMMDEINNPVLTVK+LLEVDNR+PMELPIR+VVLPMELPIR	227	Cytochrome c oxidase is the component of the respiratory chain that catalyzes the reduction of oxygen to water. Subunits 1-3 form the functional core of the enzyme complex. Subunit 2 transfers the electrons from cytochrome c via its binuclear copper A center to the bimetallic center of the catalytic subunit 1.		GO:0042773 cellular processGO:0007595 regulationGO:2001171 regulationGO:0010729 regulationGO:0010940 regulationGO:0009409 response to stimulus	GO:0016021 (other, membrane part) GO:0005743 (mitochondria, envelope) GO:0005751 (mitochondria, envelope) GO:0005739 (mitochondria, intracellular) GO:0045277 (macromolecular complex, intracellular)	GO:0005507 (binding, ion binding) GO:0004129 (catalytic activity, oxidoreductase activity)
223	Q9DC69	0.9946	Ndufa9	NADH dehydrogenase [ubiquinone] 1 alpha subcomplex subunit 9, mitochondrial OS=Mus musculus GN=Ndufa9 PE=1 SV=2;NADH dehydrogenase [ubiquinone] 1 alpha subcomplex subunit 9, mitochondrial OS=Mus musculus GN=Ndufa9 PE=1 SV=1	2.08333	1.33333	3.91667	AIAQASK+DPDAVGK+GIVNATK+WFLAVPLVSLGFK	377	Accessory subunit of the mitochondrial membrane respiratory chain NADH dehydrogenase (Complex I), that is believed not to be involved in catalysis. Complex I functions in the transfer of electrons from NADH to the respiratory chain. The immediate electron acceptor for the enzyme is believed to be ubiquinone.		GO:0007623 otherGO:0032981 cellular component organization or biogenesisGO:0009749 response to stimulusGO:1901006 cellular process	GO:0005743 (mitochondria, envelope) GO:0005759 (mitochondria, intracellular) GO:0031966 (mitochondria, envelope) GO:0005747 (mitochondria, envelope) GO:0005739 (mitochondria, intracellular) GO:0005654 (nucleus, intracellular)	GO:0003954 (catalytic activity, oxidoreductase activity) GO:0044877 (binding, macromolecular complex binding)
224	Q91Z96-2	0.9998	Bmp2k	Isoform 2 of BMP-2-inducible protein kinase OS=Mus musculus GN=Bmp2k;BMP-2-inducible protein kinase OS=Mus musculus GN=Bmp2k PE=1 SV=1	1.93333	1.46667	2.26667	FSRMPKSEGSGGGAAAGGAAGGGLGGGFASSSMGVR+MPKSEGSGGGAAAGGAAGGGLGGGFASSSMGVR+MPKSEGSGGGAAAGGAAGGGLGGGFASSSMGVRVFAVGR+SEGSGGGAAAGGAAGGGLGGGFASSSMGVR+SEGSGGGAAAGGAAGGGLGGGFASSSMGVRVFAVGR		May be involved in osteoblast differentiation.	ATP + a protein = ADP + a phosphoprotein.	GO:0045747 regulationGO:0030500 regulationGO:2000369 regulation	GO:0005737 (cytoplasm, intracellular) GO:0016607 (nucleus, intracellular) GO:0005634 (nucleus, intracellular)	GO:0035612 (binding, macromolecular complex binding) GO:0005524 (binding, carbohydrate derivative binding) GO:0019208 (molecular function regulator, enzyme regulator activity) GO:0004672 (catalytic activity, transferase activity) GO:0004674 (catalytic activity, transferase activity)
225	Q3UWM4	0.9994	Kdm7a	Lysine-specific demethylase 7A OS=Mus musculus GN=Kdm7a PE=2 SV=2	1.55	1.35	0.7	AGAAAAVAAGAAAGAAAAAGSVSAPGR+GAAAAVAAGAAAGAAAAAGSVSAPGR+MAGAAAAVAAGAAAGAAAAAGSVSAPGR		Histone demethylase required for brain development. Specifically demethylates dimethylated 'Lys-9' and 'Lys-27' (H3K9me2 and H3K27me2, respectively) of histone H3 and monomethylated histone H4 'Lys-20' residue (H4K20Me1), thereby playing a central role in histone code. Specifically binds trimethylated 'Lys-4' of histone H3 (H3K4me3), affecting histone demethylase specificity: in presence of H3K4m…		GO:0071557 cellular component organization or biogenesisGO:0070544 cellular component organization or biogenesisGO:0033169 cellular component organization or biogenesisGO:0035574 cellular component organization or biogenesisGO:0030901 developmental processGO:0045893 regulationGO:0006351 cellular process	GO:0005730 (nucleus, intracellular) GO:0005654 (nucleus, intracellular)	GO:0071558 (catalytic activity, demethylase activity) GO:0051864 (catalytic activity, demethylase activity) GO:0032454 (catalytic activity, demethylase activity) GO:0035575 (catalytic activity, demethylase activity) GO:0005506 (binding, ion binding) GO:0035064 (binding, protein binding) GO:0016706 (catalytic activity, oxidoreductase activity) GO:0008270 (binding, ion binding)
226	Q14574-2	0.978	DSC3	Isoform 3B of Desmocollin-3 OS=Homo sapiens GN=DSC3;Desmocollin-3 OS=Homo sapiens GN=DSC3 PE=1 SV=3;Desmocollin 3, isoform CRA_b OS=Homo sapiens GN=DSC3 PE=4 SV=1;cDNA FLJ78674, highly similar to Homo sapiens desmocollin type 4 OS=Homo sapiens PE=2 SV=1	5.07692	0.923077	0.769231	SFTIWLSDK+VILNVPSK		Component of intercellular desmosome junctions. Involved in the interaction of plaque proteins and intermediate filaments mediating cell-cell adhesion. May contribute to epidermal cell positioning (stratification) by mediating differential adhesiveness between cells that express different isoforms.		GO:0007155 interaction with cells and organismsGO:0070268 cellular processGO:0007156 interaction with cells and organismsGO:0001701 developmental processGO:0031424 cellular processGO:0050821 regulation	GO:0030054 (other) GO:0005911 (other, cell-cell junction) GO:0001533 (plasma membrane, cell periphery) GO:0005737 (cytoplasm, intracellular) GO:0030057 (other, anchoring junction) GO:0005576 (extracellular) GO:0016021 (other, membrane part) GO:0016020 (other) GO:0005886 (plasma membrane, cell periphery)	GO:0005509 (binding, ion binding) GO:0045295 (binding, protein binding)
227	Q6UXD5-2	0.7651	SEZ6L2	Isoform 2 of Seizure 6-like protein 2 OS=Homo sapiens GN=SEZ6L2;Isoform 3 of Seizure 6-like protein 2 OS=Homo sapiens GN=SEZ6L2;Isoform 5 of Seizure 6-like protein 2 OS=Homo sapiens GN=SEZ6L2;Isoform 6 of Seizure 6-like protein 2 OS=Homo sapiens GN=SEZ6L2;Seizure 6-like protein 2 OS=Homo sapiens GN=SEZ6L2 PE=1 SV=2;Seizure 6-like protein 2 OS=Homo sapiens GN=SEZ6L2 PE=1 SV=1;Type I transmembrane …	0.694444	0.527778	0.555556	TASHGDLIR		May contribute to specialized endoplasmic reticulum functions in neurons.			GO:0005789 (er, endomembrane system) GO:0016021 (other, membrane part) GO:0005886 (plasma membrane, cell periphery)
228	P63245	1	Rack1	Receptor of activated protein C kinase 1 OS=Rattus norvegicus GN=Rack1 PE=1 SV=3;Receptor of activated protein C kinase 1 OS=Mus musculus GN=Rack1 PE=1 SV=3;Guanine nucleotide-binding protein subunit beta-2-like 1 OS=Cricetulus griseus GN=I79_011006 PE=4 SV=1	1.29412	1.17647	1.88235	DGQAMLWDLNEGK+DVLSVAFSSDNR+LWDLTTGTTTR+LWNTLGVCK+TNHIGHTGYLNTVTVSPDGSLCASGGK+VWQVTIGTR+YTVQDESHSEWVSCVR+YWLCAATGPSIK	317	Scaffolding protein involved in the recruitment, assembly and/or regulation of a variety of signaling molecules. Interacts with a wide variety of proteins and plays a role in many cellular processes. Component of the 40S ribosomal subunit involved in translational repression (PubMed:15340087). Involved in the initiation of the ribosome quality control (RQC), a pathway that takes place when a ribo…		GO:0006915 cellular processGO:0007049 cellular processGO:0071363 cellular processGO:0007369 developmental processGO:0030308 regulationGO:1903208 regulationGO:0050765 regulationGO:0017148 regulationGO:0030178 regulationGO:0001649 cellular processGO:0043473 single-organism processGO:0043065 regulationGO:0030335 regulationGO:2000543 regulationGO:0042998 regulationGO:0043547 regulationGO:0032436 regu…	GO:0005737 (cytoplasm, intracellular) GO:0030425 (other, cell projection) GO:0016020 (other) GO:0030496 (other, midbody) GO:0043025 (other, cell body) GO:0005634 (nucleus, intracellular) GO:0043204 (other, cell body) GO:0048471 (nucleus, intracellular) GO:0001891 (plasma membrane, cell periphery) GO:0015935 (ribosome, intracellular)	GO:0008200 (molecular function regulator, channel regulator activity) GO:0005080 (binding, protein binding) GO:0030292 (molecular function regulator, enzyme regulator activity) GO:0030971 (binding, protein binding) GO:0043022 (binding, macromolecular complex binding) GO:0042169 (binding, protein binding)
229	Q6PAJ3-2	0.9986	Garem2	Isoform 2 of GRB2-associated and regulator of MAPK protein 2 OS=Mus musculus GN=Garem2;GRB2-associated and regulator of MAPK protein 2 OS=Mus musculus GN=Garem2 PE=2 SV=2	16.25	5.25	2.25	AGALAGIGGPGSMGATGGGGGAARPVK+AGALAGIGGPGSMGATGGGGGAARPVKSK+KLGRAGALAGIGGPGSMGATGGGGGAARPVK+LGRAGALAGIGGPGSMGATGGGGGAARPVK+LGRAGALAGIGGPGSMGATGGGGGAARPVKSK		Probable adapter protein that provides a critical link between cell surface epidermal growth factor receptor and the MAPK/ERK signaling pathway.
230	A8DUV1	0.9963	Hbat1	Alpha-globin OS=Mus musculus GN=Hbat1 PE=3 SV=1;Alpha-globin OS=Mus musculus GN=Hbat1 PE=2 SV=1	2.09091	1.72727	4.27273	DVSHGSAQVK+FASFPTTK+FLASVSTVLTSK+GAEYVAEALER+HLDDLPGALSALSDLHAHK+KTYFPHFDVSHGSAQVK+SGEDKSNIK+VLSGEDKSNIK	142				GO:0005833 (macromolecular complex, intracellular)	GO:0020037 (binding, heterocyclic compound binding) GO:0005506 (binding, ion binding) GO:0019825 (binding, oxygen binding) GO:0005344 (transporter, substrate-specific transporter activity)
231	P16617	1	Pgk1	Phosphoglycerate kinase 1 OS=Rattus norvegicus GN=Pgk1 PE=1 SV=2	1.7619	0.571429	1.42857	DCVGSEVENACANPAAGTVILLENLR+FHVEEEGK+IQLINNMLDK+ITLPVDFVTADK+ITLPVDFVTADKFDENAK+LGDVYVNDAFGTAHR+SVVLMSHLGRPDGVPMPDKYSLEPVAAELK+TGQATVASGIPAGWMGLDCGTESSKK+VLNNMEIGTSLYDEEGAK+VSHVSTGGGASLELLEGK+YSLEPVAAELK	417	In addition to its role as a glycolytic enzyme, it seems that PGK-1 acts as a polymerase alpha cofactor protein (primer recognition protein). May play a role in sperm motility.	ATP + 3-phospho-D-glycerate = ADP + 3-phospho-D-glyceroyl phosphate.	GO:0005975 metabolic processGO:0006094 metabolic processGO:0006096 cellular processGO:0016310 cellular process	GO:0005829 (cytoplasm, intracellular)	GO:0043531 (binding, carbohydrate derivative binding) GO:0005524 (binding, carbohydrate derivative binding) GO:0004618 (catalytic activity, transferase activity)
232	P11679	1	Krt8	Keratin, type II cytoskeletal 8 OS=Mus musculus GN=Krt8 PE=1 SV=4	3	3.375	3.25	AQYEDIANR+ASLEAAIADAEQRGEMAIKDAQTK+EYQELMNVK+FASFIDK+LEGLTDEINFLR+LEVDPNIQAVR+LLEGEESR+LVSESSDVVSK+SNMDNMFESYINNLR+WSLLQQQK+YEDEINK+YEELQTLAGK		Together with KRT19, helps to link the contractile apparatus to dystrophin at the costameres of striated muscle.		GO:0060706 cellular processGO:0000904 cellular component organization or biogenesisGO:0097191 regulationGO:0097284 cellular processGO:0007275 developmental processGO:0051599 response to stimulusGO:0051707 response to stimulusGO:0045214 cellular component organization or biogenesisGO:0033209 regulation	GO:0016327 (plasma membrane, cell periphery) GO:0071944 (other, cell periphery) GO:0005911 (other, cell-cell junction) GO:0043034 (other intracellular organelles, intracellular) GO:0005737 (cytoplasm, intracellular) GO:0016010 (plasma membrane, cell periphery) GO:0005882 (cytoskeleton, intracellular) GO:0045111 (cytoskeleton, intracellular) GO:0045095 (cytoskeleton, intracellular) GO:0016363 (nuc…	GO:0044877 (binding, macromolecular complex binding) GO:0097110 (binding, protein binding) GO:0005198 (structural molecule activity)
233	P42123	1	Ldhb	L-lactate dehydrogenase B chain OS=Rattus norvegicus GN=Ldhb PE=1 SV=2	3.72727	0.727273	3.54545	FIIPQIVK+GEMMDLQHGSLFLQTPK+LIAPVADDETAVPNNK+MVVDSAYEVIK+SADTLWDIQK+SLADELALVDVLEDK+VIGSGCNLDSAR	334		(S)-lactate + NAD(+) = pyruvate + NADH.	GO:0005975 metabolic processGO:0006089 cellular processGO:0019674 cellular process	GO:0005829 (cytoplasm, intracellular) GO:0045121 (other, membrane part) GO:0043209 (other, myelin sheath)	GO:0042802 (binding, protein binding) GO:0019900 (binding, protein binding) GO:0004459 (catalytic activity, oxidoreductase activity) GO:0004457 (catalytic activity, oxidoreductase activity) GO:0051287 (binding, cofactor binding)
234	P40925-2	1	MDH1	Isoform 2 of Malate dehydrogenase, cytoplasmic OS=Homo sapiens GN=MDH1;Isoform 3 of Malate dehydrogenase, cytoplasmic OS=Homo sapiens GN=MDH1;Malate dehydrogenase, cytoplasmic OS=Homo sapiens GN=MDH1 PE=1 SV=4;Malate dehydrogenase, cytoplasmic OS=Homo sapiens GN=MDH1 PE=1 SV=1;Malate dehydrogenase OS=Homo sapiens GN=HEL-S-32 PE=2 SV=1	1.3	1	1.1	FVEGLPINDFSR+GEFVTTVQQR+VIVVGNPANTNCLTASK			3-(3,5-diiodo-4-hydroxyphenyl)lactate + NAD(+) = 3-(3,5-diiodo-4-hydroxyphenyl)pyruvate + NADH.	GO:0006094 metabolic processGO:0006108 cellular processGO:0006734 cellular processGO:0006107 cellular processGO:0006099 cellular process	GO:0005829 (cytoplasm, intracellular) GO:0070062 (extracellular, extracellular exosome) GO:0005615 (extracellular, extracellular region part) GO:0005739 (mitochondria, intracellular) GO:0043209 (other, myelin sheath)	GO:0047860 (catalytic activity, oxidoreductase activity) GO:0030060 (catalytic activity, oxidoreductase activity) GO:0004470 (catalytic activity, oxidoreductase activity) GO:0051287 (binding, cofactor binding)
235	O55143-2	1	Atp2a2	Isoform 2 of Sarcoplasmic/endoplasmic reticulum calcium ATPase 2 OS=Mus musculus GN=Atp2a2;Sarcoplasmic/endoplasmic reticulum calcium ATPase 2 OS=Mus musculus GN=Atp2a2 PE=1 SV=2;Isoform 2 of Sarcoplasmic/endoplasmic reticulum calcium ATPase 2 OS=Rattus norvegicus GN=Atp2a2;Sarcoplasmic/endoplasmic reticulum calcium ATPase 2 OS=Rattus norvegicus GN=Atp2a2 PE=1 SV=1;Calcium-transporting ATPase OS=…	2.25	1.625	1.375	IEVASSVK+IGIFGQDEDVTSK+ISLPVILMDETLK+IVEFLQSFDEITAMTGDGVNDAPALK+LDEFGEQLSK+MNVFDTELK+NMLFSGTNIAAGK+SLPSVETLGCTSVICSDK+TASEMVLADDNFSTIVAAVEEGR+VDQSILTGESVSVIK+VGEATETALTCLVEK		This magnesium-dependent enzyme catalyzes the hydrolysis of ATP coupled with the translocation of calcium from the cytosol to the sarcoplasmic reticulum lumen. Isoform SERCA2A is involved in the regulation of the contraction/relaxation cycle. Acts as a regulator of TNFSF11-mediated Ca(2+) signaling pathways via its interaction with TMEM64 which is critical for the TNFSF11-induced CREB1 activation…	ATP + H(2)O + Ca(2+)(Side 1) = ADP + phosphate + Ca(2+)(Side 2).	GO:1990036 localizationGO:0070588 localizationGO:0006816 localizationGO:1903515 localizationGO:0014898 interaction with cells and organismsGO:0006874 regulationGO:0034599 cellular processGO:0032469 regulationGO:0006984 regulationGO:0045822 regulationGO:0006996 cellular component organization or biogenesisGO:0032470 regulationGO:1903233 regulationGO:0086036 regulationGO:0010882 regulationGO:000693…	GO:0090534 (macromolecular complex, catalytic complex) GO:0005783 (er, endomembrane system) GO:0005789 (er, endomembrane system) GO:0031234 (plasma membrane, cell periphery) GO:0014801 (er, endomembrane system) GO:0016020 (other) GO:0005654 (nucleus, intracellular) GO:0048471 (nucleus, intracellular) GO:0032991 (macromolecular complex) GO:0097470 (other, ribbon synapse) GO:0016529 (er, endomembra…	GO:0005524 (binding, carbohydrate derivative binding) GO:0005509 (binding, ion binding) GO:0005388 (catalytic activity, hydrolase activity) GO:0086039 (catalytic activity, hydrolase activity) GO:0019899 (binding, protein binding) GO:0031775 (binding, protein binding) GO:0008022 (binding, protein binding) GO:0044548 (binding, protein binding)
236	Q9ERI6	0.966	Rdh14	Retinol dehydrogenase 14 OS=Mus musculus GN=Rdh14 PE=1 SV=1;Retinol dehydrogenase 14 (all-trans/9-cis/11-cis) OS=Rattus norvegicus GN=Rdh14 PE=1 SV=1;Retinol dehydrogenase 14 OS=Cricetulus griseus GN=I79_009772 PE=4 SV=1;Putative uncharacterized protein (Fragment) OS=Mus musculus GN=Rdh14 PE=2 SV=1;Retinol dehydrogenase 14 (All-trans and 9-cis) OS=Mus musculus GN=Rdh14 PE=2 SV=1	1	0.736842	2.52632	IVVVSSK	334	Exhibits an oxidoreductive catalytic activity towards retinoids. Most efficient as an NADPH-dependent retinal reductase. Displays high activity toward 9-cis and all-trans-retinol. No steroid dehydrogenase activity detected (By similarity).		GO:0042572 regulation	GO:0005783 (er, endomembrane system) GO:0005739 (mitochondria, intracellular)	GO:0008106 (catalytic activity, oxidoreductase activity)
237	P31232	1	Tagln	Transgelin OS=Rattus norvegicus GN=Tagln PE=1 SV=2;Transgelin OS=Rattus norvegicus GN=Tagln PE=1 SV=1	1.5625	1.5	1.8125	EFTDSQLQEGK+LVEWIVMQCGPDVGRPDR+QMEQVAQFLK+TDMFQTVDLFEGK+TVMALGSLAVTK	201	Actin cross-linking/gelling protein.			GO:0005737 (cytoplasm, intracellular)	GO:0051015 (binding, macromolecular complex binding) GO:0030674 (binding, binding, bridging)
238	Q5M7V3	1	LOC367586	LOC367586 protein OS=Rattus norvegicus GN=LOC367586 PE=2 SV=1	0.823529	1	2.41176	DVLTITLTPK+EVQLVESGGGLVQPGR+GFYPPDIYTEWK+NTPPTMDTDGSYFLYSK+SISKPEGTPR+VNSGAFPAPIEK+VTCVVVDISQNDPEVR	461
239	P50990-2	1	CCT8	Isoform 2 of T-complex protein 1 subunit theta OS=Homo sapiens GN=CCT8;T-complex protein 1 subunit theta OS=Homo sapiens GN=CCT8 PE=1 SV=4;Chaperonin containing TCP1, subunit 8 (Theta) variant (Fragment) OS=Homo sapiens PE=2 SV=1;CCT8 protein OS=Homo sapiens GN=CCT8 PE=2 SV=1	3.84615	1.07692	1.07692	ETEGDVTSVKDAK+FAEAFEAIPR+LATNAAVTVLR+LFVTNDAATILR+LVPGGGATEIELAK+NVGLDIEAEVPAVK+QITSYGETCPGLEQYAIK+YNIMLVR		Component of the chaperonin-containing T-complex (TRiC), a molecular chaperone complex that assists the folding of proteins upon ATP hydrolysis (PubMed:25467444). The TRiC complex mediates the folding of WRAP53/TCAB1, thereby regulating telomere maintenance (PubMed:25467444). As part of the TRiC complex may play a role in the assembly of BBSome, a complex involved in ciliogenesis regulating trans…		GO:0006458 cellular processGO:0007339 cellular processGO:0061077 cellular processGO:0043312 cellular processGO:0046931 cellular component organization or biogenesisGO:1904851 regulationGO:1904871 regulationGO:1904874 regulationGO:0032212 regulationGO:0006457 cellular processGO:0050821 regulationGO:1901998 localization	GO:0035578 (other intracellular organelles, endomembrane system) GO:0044297 (other, cell body) GO:0005813 (cytoskeleton, intracellular) GO:0005832 (macromolecular complex, intracellular) GO:0005929 (other, cell projection) GO:0005737 (cytoplasm, intracellular) GO:0005829 (cytoplasm, intracellular) GO:0070062 (extracellular, extracellular exosome) GO:0005576 (extracellular) GO:1904813 (other intra…	GO:0005524 (binding, carbohydrate derivative binding) GO:0042623 (catalytic activity, hydrolase activity) GO:0045296 (binding, protein binding) GO:0044183 (binding, protein binding) GO:0051082 (binding, protein binding)
240	Q9Z204-2	1	Hnrnpc	Isoform C1 of Heterogeneous nuclear ribonucleoproteins C1/C2 OS=Mus musculus GN=Hnrnpc;Isoform 3 of Heterogeneous nuclear ribonucleoproteins C1/C2 OS=Mus musculus GN=Hnrnpc;Isoform 4 of Heterogeneous nuclear ribonucleoproteins C1/C2 OS=Mus musculus GN=Hnrnpc;Isoform 5 of Heterogeneous nuclear ribonucleoproteins C1/C2 OS=Mus musculus GN=Hnrnpc;Heterogeneous nuclear ribonucleoproteins C1/C2 OS=Mus …	0.666667	1	0.7	ASNVTNK+MIAGQVLDINLAAEPK+MYSYPAR+VDSLLESLEK+VFIGNLNTLVVK		Binds pre-mRNA and nucleates the assembly of 40S hnRNP particles. Interacts with poly-U tracts in the 3'-UTR or 5'-UTR of mRNA and modulates the stability and the level of translation of bound mRNA molecules. Single HNRNPC tetramers bind 230-240 nucleotides. Trimers of HNRNPC tetramers bind 700 nucleotides. May play a role in the early steps of spliceosome assembly and pre-mRNA splicing. N6-methy…		GO:0070935 regulationGO:0000398 cellular processGO:0090367 regulationGO:0032211 regulation	GO:0015629 (cytoskeleton, intracellular) GO:0071013 (nucleus, intracellular) GO:0005829 (cytoplasm, intracellular) GO:0005654 (nucleus, intracellular) GO:1990826 (nucleus, intracellular) GO:0005634 (nucleus, intracellular) GO:0045120 (nucleus, intracellular) GO:0032991 (macromolecular complex) GO:0005681 (nucleus, intracellular) GO:0005697 (nucleus, intracellular)	GO:1990827 (binding, protein binding) GO:0004857 (molecular function regulator, enzyme regulator activity) GO:0042802 (binding, protein binding) GO:0003730 (binding, heterocyclic compound binding) GO:0003729 (binding, heterocyclic compound binding) GO:1990247 (binding, heterocyclic compound binding) GO:0008266 (binding, heterocyclic compound binding) GO:0019904 (binding, protein binding) GO:00430…
241	P15800	1	Lamb2	Laminin subunit beta-2 OS=Rattus norvegicus GN=Lamb2 PE=1 SV=1;Laminin subunit beta-2 OS=Rattus norvegicus GN=Lamb2 PE=1 SV=1	2.21429	1.42857	1.71429	AETVQAALEEAQR+AMDYDLLLR+CGGLGCSGAAATADLALGR+DFLSQEGADPDSIEMVATR+DGFFGLSASNPR+EGQEVEFLVTSLPR+ETPSWTGVGFVR+HSNFLGAYDSIR+IQNVVTSFAPQR+LEQWAQELQQTGVLGAFESSFLNLQGK+LQELEGTYEENER+LVEATEGLR+QHLANQQALGR+SLADVDTILAHTMGDVR+VLDISIPASPEQIQR+WEPQVPEQWAELELVVQRPGPVSAHSPCGHVLPR+YSEIEPSTEGEVIYR	1801	Binding to cells via a high affinity receptor, laminin is thought to mediate the attachment, migration and organization of cells into tissues during embryonic development by interacting with other extracellular matrix components.		GO:0007155 interaction with cells and organisms	GO:0005604 (extracellular, extracellular matrix)
242	E9PU87	1	Sik3	Serine/threonine-protein kinase SIK3 OS=Mus musculus GN=Sik3 PE=1 SV=1	1.30435	0.73913	1	AAAAASGAGGVAVAGAGGAGPAGR+AAAAASGAGGVAVAGAGGAGPAGRLLPPPAAGPPAAPAAVPPAAVPARPTAPASR+EQSLLQPPTLQLLNGMGPLGRR+LLPPPAAGPPAAPAAVPPAAVPARPTAPASRGSMAARIGYYEIDR+MAAAAASGAGGVAVAGAGGAGPAGR+MAAAAASGAGGVAVAGAGGAGPAGRLLPPPAAGPPAAPAAVPPAAVPARPTAPASR+RHTLAMTSPTAEIPPDLQR	1369					GO:0005524 (binding, carbohydrate derivative binding) GO:0000287 (binding, ion binding) GO:0004674 (catalytic activity, transferase activity)
243	P04785	1	P4hb	Protein disulfide-isomerase OS=Rattus norvegicus GN=P4hb PE=1 SV=2	5.3	0.3	3.4	DALEEEDNVLVLK+EADDIVNWLK+HNQLPLVIEFTEQTAPK+IKPHLMSQELPEDWDKQPVK+ILEFFGLK+ITQFCHHFLEGK+LGETYKDHENIVIAK+LITLEEEMTK+QFLLAAEAVDDIPFGITSNSDVFSK+TGPAATTLSDTAAAESLVDSSEVTVIGFFK+VDATEESDLAQQYGVR	509	This multifunctional protein catalyzes the formation, breakage and rearrangement of disulfide bonds. At the cell surface, seems to act as a reductase that cleaves disulfide bonds of proteins attached to the cell. May therefore cause structural modifications of exofacial proteins. Inside the cell, seems to form/rearrange disulfide bonds of nascent proteins. At high concentrations, functions as a c…	Catalyzes the rearrangement of -S-S- bonds in proteins.	GO:0045454 regulationGO:0071456 cellular processGO:0018401 cellular processGO:0046598 regulationGO:0006457 cellular processGO:1902175 regulationGO:0034976 cellular process	GO:0005783 (er, endomembrane system) GO:0034663 (er, endomembrane system) GO:0005788 (er, endomembrane system) GO:0005793 (er, intracellular) GO:0009897 (plasma membrane, cell periphery) GO:0042470 (other intracellular organelles, intracellular) GO:0016222 (er, endomembrane system)	GO:0019899 (binding, protein binding) GO:0005178 (binding, macromolecular complex binding) GO:0015037 (catalytic activity, oxidoreductase activity) GO:0004656 (catalytic activity, oxidoreductase activity) GO:0003756 (catalytic activity, isomerase activity) GO:0046982 (binding, protein binding)
244	Q3UKQ2	0.9992	Cct8	Uncharacterized protein OS=Mus musculus GN=Cct8 PE=2 SV=1	7.28571	3.71429	2.28571	AIAGTGANVIVTGGK+DMLEASILDTYLGK+EDGAISTIVLR+FAEAFEAIPR+GEENLMDAQVKAIAGTGANVIVTGGKVADIALHYADK+LATNAAVTVLR+LFVTNDAATILR+LVPGGGATEIELAK+MALHVPKAPGFAQMLK+NVGLDIEAEVPAVK+QITSYGETCPGLEQYAIK+TAEELMNFSKGEENLMDAQVKAIAGTGANVIVTGGK	548			GO:0006457 cellular process	GO:0005737 (cytoplasm, intracellular)	GO:0005524 (binding, carbohydrate derivative binding) GO:0051082 (binding, protein binding)
245	P24268	1	Ctsd	Cathepsin D OS=Rattus norvegicus GN=Ctsd PE=1 SV=1;Cathepsin D OS=Rattus norvegicus GN=Ctsd PE=1 SV=1	1.24	1.32	0.32	AIGAVPLIQGEYMIPCEK+DPTGQPGGELMLGGTDSR+GGCEAIVDTGTSLLVGPVDEVK+VSSLPIITFK	407	Acid protease active in intracellular protein breakdown. Plays a role in APP processing following cleavage and activation by ADAM30 which leads to APP degradation.	Specificity similar to, but narrower than, that of pepsin A. Does not cleave the 4-Gln-|-His-5 bond in B chain of insulin.	GO:0006914 cellular processGO:0030163 metabolic processGO:0006508 metabolic processGO:0031667 response to stimulus	GO:0005615 (extracellular, extracellular region part) GO:0005764 (other intracellular organelles, intracellular) GO:0042470 (other intracellular organelles, intracellular)	GO:0004190 (catalytic activity, hydrolase activity) GO:0004175 (catalytic activity, hydrolase activity) GO:0042277 (binding, amide binding)
246	P51635	1	Akr1a1	Alcohol dehydrogenase [NADP(+)] OS=Rattus norvegicus GN=Akr1a1 PE=1 SV=2	4.33333	3.22222	2.55556	ALEALVAK+EELFVTSK+GLEVTAYSPLGSSDR+HIDCASVYGNETEIGEALK+ILQNIQVFDFTFSPEEMK+QLDALNK+TASSVLLHTGQK+YALSVGYR	325	Catalyzes the NADPH-dependent reduction of a variety of aromatic and aliphatic aldehydes to their corresponding alcohols. Catalyzes the reduction of mevaldate to mevalonic acid and of glyceraldehyde to glycerol. Has broad substrate specificity. Plays a role in the activation of procarcinogens, such as polycyclic aromatic hydrocarbon trans-dihydrodiols, and in the metabolism of various xenobiotics…	An alcohol + NADP(+) = an aldehyde + NADPH.	GO:0046185 cellular processGO:0042840 cellular processGO:0019853 cellular process	GO:0016324 (plasma membrane, apical part of cell) GO:0005829 (cytoplasm, intracellular) GO:0045202 (other)	GO:0004032 (catalytic activity, oxidoreductase activity) GO:0047939 (catalytic activity, oxidoreductase activity)
247	Q60587	1	Hadhb	Trifunctional enzyme subunit beta, mitochondrial OS=Rattus norvegicus GN=Hadhb PE=1 SV=1	6.75	1.625	3.125	AALSGLLYR+DFIYVSQDPK+DLMPHDLAR+DQLLLGPTYATPK+IPFLLSGTSYK+LAAAFAVSR+LNFLSPELPAVAEFSTNETMGHSADR+NIVVVEGVR+TLAKPNLK	475		Acyl-CoA + acetyl-CoA = CoA + 3-oxoacyl-CoA.	GO:0006635 cellular process	GO:0005783 (er, endomembrane system) GO:0016507 (mitochondria, intracellular) GO:0005743 (mitochondria, envelope) GO:0005741 (mitochondria, envelope) GO:0005739 (mitochondria, intracellular)	GO:0003857 (catalytic activity, oxidoreductase activity) GO:0003988 (catalytic activity, transferase activity) GO:0004300 (catalytic activity, lyase activity) GO:0000062 (binding, cofactor binding) GO:0016509 (catalytic activity, oxidoreductase activity) GO:0016508 (catalytic activity, lyase activity) GO:0051287 (binding, cofactor binding) GO:0044877 (binding, macromolecular complex binding)
248	P35704	1	Prdx2	Peroxiredoxin-2 OS=Rattus norvegicus GN=Prdx2 PE=1 SV=3;Peroxiredoxin-2 OS=Mus musculus GN=Prdx2 PE=1 SV=3;Peroxiredoxin-2 OS=Rattus norvegicus GN=Prdx2 PE=1 SV=1	1.58824	2.64706	0.647059	EGGLGPLNIPLLADVTK+KEGGLGPLNIPLLADVTK+QITVNDLPVGR+SLSQNYGVLK	198	Thiol-specific peroxidase that catalyzes the reduction of hydrogen peroxide and organic hydroperoxides to water and alcohols, respectively. Plays a role in cell protection against oxidative stress by detoxifying peroxides and as sensor of hydrogen peroxide-mediated signaling events. Might participate in the signaling cascades of growth factors and tumor necrosis factor-alpha by regulating the int…	2 R'-SH + ROOH = R'-S-S-R' + H(2)O + ROH.	GO:0045454 regulationGO:0043524 regulationGO:0006979 response to stimulus	GO:0005829 (cytoplasm, intracellular)	GO:0004601 (antioxidant activity, peroxidase activity) GO:0051920 (antioxidant activity, peroxiredoxin activity)
249	B5DFC9	1	Nid2	Nidogen-2 OS=Rattus norvegicus GN=Nid2 PE=2 SV=1;Nidogen-2 OS=Rattus norvegicus GN=Nid2 PE=1 SV=1;Nidogen-2 OS=Rattus norvegicus GN=Nid2 PE=4 SV=2	4.58333	1.75	1.08333	DDQYVPQCDDLGHFIPLQCHGK+DIGLPNGLTFDPFSK+EILPNYPESGHVPPLSGGR+ESYNVQLQLPAR+FAVTNQIGPVEVDSAPTAVNPCYDGSHTCDTTAR+GNLYWTDWNR+HLAVPATQQLTVDR+HTCVLIAPPPNPCLDGSHTCAPEGQAR+SCVDVNECATGFHR+VIQNHLNYPFSVVSYADHFYHTDWR+YVVGLEDHVSSK		Cell adhesion glycoprotein. Might be involved in osteoblast differentiation. It probably has a role in cell-extracellular matrix interactions (By similarity).		GO:0007160 interaction with cells and organisms	GO:0005604 (extracellular, extracellular matrix) GO:0009986 (cell surface, cell surface)	GO:0005509 (binding, ion binding)
250	O88737-2	1	Bsn	Isoform 2 of Protein bassoon OS=Mus musculus GN=Bsn;Protein bassoon OS=Mus musculus GN=Bsn PE=1 SV=4	2.41667	2.66667	2.25	AAGPPTPGLGPVPGPGPGPGPGSVPR+AMSSVGIQTISDCSVQTEPEQLPRVSPAIHITAATDPK+APQAQTTPGPGPAGAKPGARPGGTPGAPASQPGAEGESVFSKILPGGAAEQAGK+EAGPRPPGSGPGPGPTPGAK+EAGPRPPGSGPGPGPTPGAKTEPGAR+EAGPRPPGSGPGPGPTPGAKTEPGARMGPGSGPGALAK+EKPLSGGDSEVGAPQPSRGYSYFTGSSPPLSPSTPSESPTFSPGKLGPR+EPELEMESLTGSPEDR+ETRAQGPSGQEAESPRR+EVGMTFSQGPGSPATTASPTR+FPIASSVPPAEGPVYLGKPAAAKASGAGGPPRPELPAGVAR+GNEASLEGGAGEGPLPPGGSGLGPGPGAGKPPSALAGGGQLP…		Is thought to be involved in the organization of the cytomatrix at the nerve terminals active zone (CAZ) which regulates neurotransmitter release (PubMed:12628169). Seems to act through binding to ERC2/CAST1 (By similarity). Essential in regulated neurotransmitter release from a subset of brain glutamatergic synapses (PubMed:12628169). Involved in the formation of the retinal photoreceptor ribbon…		GO:0008088 cellular processGO:0099526 regulationGO:0035418 localizationGO:0008090 cellular processGO:0007416 cellular component organization or biogenesis	GO:0030424 (other, cell projection) GO:1904115 (cytoplasm, cell projection) GO:0030054 (other) GO:0009986 (cell surface, cell surface) GO:0048788 (cytoskeleton, cell periphery) GO:0030425 (other, cell projection) GO:0060076 (other, excitatory synapse) GO:0019898 (other, membrane part) GO:0060077 (other, inhibitory synapse) GO:0044306 (other, cell projection) GO:0043025 (other, cell body) GO:19902…	GO:0045503 (binding, protein binding) GO:0046872 (binding, ion binding) GO:0098882 (structural molecule activity, structural constituent of synapse) GO:0001222 (binding, protein binding)
251	I7HJR1	0.9994	Col9a2	Collagen alpha-2(IX) chain OS=Mus musculus GN=Col9a2 PE=1 SV=1	5	0.428571	0.714286	EALGAAGMVGLPGPPGPPGYPGK+EALGAAGMVGLPGPPGPPGYPGKQGPNGHPGPR+GDVGASGEQGIPGPPGPQGIR+GDVGSQGARGPQGITGPKGTTGPPGIDGK+GEMGRGHPGMPGPPGIPGLPGRPGQAINGKDGDR+GEPGQQGLPGVSGPPGKEGEPGPRGEIGPQGIMGQK+GETGYPGPSGDAGAPGVQGYPGLPGPR+GPQGITGPKGTTGPPGIDGKDGTPGIPGMK+GSPGKTGPRGGVGDPGVAGLPGEK+MIQEQLAEVAVSAKREALGAAGMVGLPGPPGPPGYPGK+MTAVPAPR+QGKPGPKGDVGASGEQGIPGPPGPQGIRGYPGMAGPK+REALGAAGMVGLPGPPGPPGYPGK+TGPRGGVGDPGVAGLPGEK+VG…	688				GO:0005594 (macromolecular complex, protein complex)
252	P49368-2	1	CCT3	Isoform 2 of T-complex protein 1 subunit gamma OS=Homo sapiens GN=CCT3;T-complex protein 1 subunit gamma OS=Homo sapiens GN=CCT3 PE=1 SV=4;T-complex protein 1 subunit gamma OS=Homo sapiens PE=2 SV=1;T-complex protein 1 subunit gamma OS=Homo sapiens GN=CCT3 PE=1 SV=1;T-complex protein 1 subunit gamma OS=Homo sapiens PE=2 SV=1;T-complex protein 1 subunit gamma (Fragment) OS=Homo sapiens PE=2 SV=1	1.5	1.78571	2.28571	ACTILLR+ANITAIR+AVAQALEVIPR+ELGIWEPLAVK+GESQTDIEITR+IPGGIIEDSCVLR+IVLLDSSLEYK+NVLLDPQLVPGGGASEMAVAHALTEK+QGGAPDAGQE+TAVETAVLLLR+WSSLACNIALDAVK		Component of the chaperonin-containing T-complex (TRiC), a molecular chaperone complex that assists the folding of proteins upon ATP hydrolysis (PubMed:25467444). The TRiC complex mediates the folding of WRAP53/TCAB1, thereby regulating telomere maintenance (PubMed:25467444). As part of the TRiC complex may play a role in the assembly of BBSome, a complex involved in ciliogenesis regulating trans…		GO:0006458 cellular processGO:0007339 cellular processGO:0061077 cellular processGO:0046931 cellular component organization or biogenesisGO:1904851 regulationGO:1904871 regulationGO:1904874 regulationGO:0032212 regulationGO:0006457 cellular processGO:0050821 regulationGO:1901998 localization	GO:0044297 (other, cell body) GO:0005832 (macromolecular complex, intracellular) GO:0005856 (cytoskeleton, intracellular) GO:0005829 (cytoplasm, intracellular) GO:0070062 (extracellular, extracellular exosome) GO:0005874 (cytoskeleton, intracellular) GO:0043209 (other, myelin sheath) GO:0005886 (plasma membrane, cell periphery) GO:0002199 (macromolecular complex, protein complex)	GO:0005524 (binding, carbohydrate derivative binding) GO:0003723 (binding, heterocyclic compound binding) GO:0051082 (binding, protein binding)
253	Q01177	1	Plg	Plasminogen OS=Rattus norvegicus GN=Plg PE=2 SV=2	2.3	2.3	3.5	CEGETDFICR+DSLDGYVSTQGASLHSLTK+DVILFEK+EQQCVIMAENSK+GTVSVTASGK+ILGSDVQQIAVTK+LSRPATITDNVIPACLPSPNYVVADR+LVLEPNDADIALLK+YVNWIER	812	Angiostatin is an angiogenesis inhibitor that blocks neovascularization and growth of experimental primary and metastatic tumors in vivo.	Preferential cleavage: Lys-|-Xaa > Arg-|-Xaa; higher selectivity than trypsin. Converts fibrin into soluble products.	GO:0007596 regulationGO:0042730 regulationGO:0060716 developmental processGO:0071674 cellular processGO:0046716 regulationGO:0045445 cellular processGO:0051603 cellular processGO:0042246 developmental processGO:0048771 interaction with cells and organismsGO:0060707 cellular process	GO:0005615 (extracellular, extracellular region part) GO:0019897 (plasma membrane, cell periphery) GO:0098978 (other, glutamatergic synapse) GO:0043231 (other intracellular organelles, intracellular) GO:0005886 (plasma membrane, cell periphery)	GO:0004175 (catalytic activity, hydrolase activity) GO:0019899 (binding, protein binding) GO:0019900 (binding, protein binding) GO:0004252 (catalytic activity, hydrolase activity)
254	Q60847-2	1	Col12a1	Isoform 2 of Collagen alpha-1(XII) chain OS=Mus musculus GN=Col12a1;Isoform 5 of Collagen alpha-1(XII) chain OS=Mus musculus GN=Col12a1;Collagen alpha-1(XII) chain OS=Mus musculus GN=Col12a1 PE=2 SV=3;Collagen alpha-1(XII) chain OS=Mus musculus GN=Col12a1 PE=1 SV=1	0.333333	1.45833	1.33333	ALALGALQNIR+DVTHSTMNVVWEPVLGK+DYRPQVGVIADPSSK+IIYSPTVGDPIDEYTTVPGR+IVDDLTINLCNSVK+IVEVFEIGPK+IVYSPVAGTRPSESIVVPGNTR+IYIDCYEIIEK+LLPETPSDPFAIWQITDR+LQPQTTYDITVLPMYK+NFASVQGVSLESGSFPSYSAYR+NNVILQPLQPDTPYK+TEFNLNQYYR+TYQVGWDTFCVK+VLTWESGMR+VQIALAQYSGDPR		Type XII collagen interacts with type I collagen-containing fibrils, the COL1 domain could be associated with the surface of the fibrils, and the COL2 and NC3 domains may be localized in the perifibrillar matrix.		GO:0007155 interaction with cells and organismsGO:0030199 cellular component organization or biogenesisGO:0035987 cellular process	GO:0005595 (extracellular, extracellular matrix) GO:0031012 (extracellular, extracellular matrix) GO:0005615 (extracellular, extracellular region part)
255	P97496	1	Smarcc1	SWI/SNF complex subunit SMARCC1 OS=Mus musculus GN=Smarcc1 PE=1 SV=2	1.53846	2.84615	2.23077	AATAGGGPGAAAGAVGAGGAAAASGLAVYR+AATAGGGPGAAAGAVGAGGAAAASGLAVYRR+AATAGGGPGAAAGAVGAGGAAAASGLAVYRRK+ATAGGGPGAAAGAVGAGGAAAASGLAVYRRK+DMEDPTPVPNIEEVVLPKNVNPKK+MAATAGGGPGAAAGAVGAGGAAAASGLAVYR+MAATAGGGPGAAAGAVGAGGAAAASGLAVYRR+MAATAGGGPGAAAGAVGAGGAAAASGLAVYRRK		Involved in transcriptional activation and repression of select genes by chromatin remodeling (alteration of DNA-nucleosome topology). Component of SWI/SNF chromatin remodeling complexes that carry out key enzymatic activities, changing chromatin structure by altering DNA-histone contacts within a nucleosome in an ATP-dependent manner. May stimulate the ATPase activity of the catalytic subunit of…		GO:0009887 developmental processGO:0043044 cellular component organization or biogenesisGO:0006338 cellular component organization or biogenesisGO:0006323 cellular component organization or biogenesisGO:0008286 regulationGO:0032435 regulationGO:0007399 developmental processGO:0006337 cellular component organization or biogenesisGO:0045944 regulationGO:0045893 regulationGO:0030850 developmental pr…	GO:0005737 (cytoplasm, intracellular) GO:0005622 (other, intracellular) GO:0071565 (nucleus, intracellular) GO:0071564 (nucleus, intracellular) GO:0005654 (nucleus, intracellular) GO:0005634 (nucleus, intracellular) GO:0016514 (nucleus, intracellular) GO:0001741 (chromosome, intracellular)	GO:0003682 (binding, chromatin binding) GO:0003677 (binding, heterocyclic compound binding) GO:0047485 (binding, protein binding)
256	P69905	1	HBA1	Hemoglobin subunit alpha OS=Homo sapiens GN=HBA1 PE=1 SV=2;Mutant hemoglobin alpha 2 globin chain OS=Homo sapiens GN=HBA2 PE=3 SV=1;Alpha-2 globin chain OS=Homo sapiens GN=HBA2 PE=3 SV=1;HCG1745306, isoform CRA_a OS=Homo sapiens GN=HBA2 PE=1 SV=1;Alpha-1 thalassemia globin gene (Fragment) OS=Homo sapiens PE=3 SV=1;Hemoglobin alpha 1 (Fragment) OS=Homo sapiens GN=HBA1 PE=3 SV=1;Hemoglobin alpha-1 …	1.45455	3.36364	3.18182	FLASVSTVLTSK+FLASVSTVLTSKYR+KVADALTNAVAHVDDMPNALSALSDLHAHK+KVADALTNAVAHVDDMPNALSALSDLHAHKLR		Involved in oxygen transport from the lung to the various peripheral tissues.		GO:0015701 localizationGO:0098869 cellular processGO:0042744 cellular processGO:0015671 localizationGO:0010942 regulationGO:0051291 cellular component organization or biogenesisGO:0006898 localizationGO:0042542 response to stimulus	GO:0072562 (extracellular, extracellular region part) GO:0005829 (cytoplasm, intracellular) GO:0022627 (ribosome, intracellular) GO:0071682 (endosome, intracellular) GO:0070062 (extracellular, extracellular exosome) GO:0005576 (extracellular) GO:0005615 (extracellular, extracellular region part) GO:0031838 (macromolecular complex, protein complex) GO:0005833 (macromolecular complex, intracellular…	GO:0020037 (binding, heterocyclic compound binding) GO:0005506 (binding, ion binding) GO:0019825 (binding, oxygen binding) GO:0005344 (transporter, substrate-specific transporter activity)
257	O35129	1	Phb2	Prohibitin-2 OS=Mus musculus GN=Phb2 PE=1 SV=1;Prohibitin-2 OS=Rattus norvegicus GN=Phb2 PE=1 SV=1;Prohibitin-2 OS=Rattus norvegicus GN=Phb2 PE=1 SV=1;Prohibitin-2 (Fragment) OS=Mus musculus GN=Phb2 PE=1 SV=1;Prohibitin-2 (Fragment) OS=Mus musculus GN=Phb2 PE=1 SV=1;Prohibitin-2 OS=Cricetulus griseus GN=I79_001428 PE=4 SV=1;Prohibitin 2 OS=Mus musculus GN=Phb2 PE=1 SV=1	3	1.5	1.58333	DLQMVNISLR+FNASQLITQR+VLPSIVNEVLK+VLSRPNAQELPSMYQR	299	Acts as a mediator of transcriptional repression by nuclear hormone receptors via recruitment of histone deacetylases. Functions as an estrogen receptor (ER)-selective coregulator that potentiates the inhibitory activities of antiestrogens and represses the activity of estrogens. Competes with NCOA1 for modulation of ER transcriptional activity. Probably involved in regulating mitochondrial respi…		GO:0071456 cellular processGO:0071300 cellular processGO:0060749 developmental processGO:0060744 developmental processGO:0007005 cellular component organization or biogenesisGO:0043066 regulationGO:0043433 regulationGO:0033147 regulationGO:0033600 regulationGO:0045892 regulationGO:1902808 regulationGO:0051091 regulationGO:0070374 regulationGO:0031536 regulationGO:0000060 localizationGO:0050821 re…	GO:0030424 (other, cell projection) GO:0071944 (other, cell periphery) GO:0009986 (cell surface, cell surface) GO:0005737 (cytoplasm, intracellular) GO:0098982 (other, GABA-ergic synapse) GO:0098978 (other, glutamatergic synapse) GO:0005743 (mitochondria, envelope) GO:0005741 (mitochondria, envelope) GO:0005739 (mitochondria, intracellular) GO:0016363 (nucleus, intracellular) GO:0005634 (nucleus,…	GO:0033218 (binding, amide binding) GO:0008022 (binding, protein binding) GO:0047485 (binding, protein binding)
258	Q80ZI1	1	Trnp1	TMF-regulated nuclear protein 1 OS=Mus musculus GN=Trnp1 PE=1 SV=1	2.14286	7.71429	3.42857	MPGCRISACGPGAQEGTAEPGSPPPPPREPLPSLQPPSPSPTSTPTPTK+QGASGGSGGAGPAGIAGAAAGAGGR+QGASGGSGGAGPAGIAGAAAGAGGRALELAEAR+QGASGGSGGAGPAGIAGAAAGAGGRALELAEARR+WRQGASGGSGGAGPAGIAGAAAGAGGR+WRQGASGGSGGAGPAGIAGAAAGAGGRALELAEAR	223	DNA-binding factor that regulates the expression of a subset of genes and plays a key role in tangential, radial, and lateral expansion of the brain neocortex. Regulates neural stem cells proliferation and the production of intermediate neural progenitors and basal radial glial cells affecting the process of cerebral cortex gyrification. May control the proliferation rate of cells by regulating t…		GO:0007049 cellular processGO:0021696 developmental processGO:0061351 single-organism processGO:0051726 regulationGO:0042127 regulationGO:0006355 regulationGO:0006351 cellular process	GO:0005634 (nucleus, intracellular)	GO:0003677 (binding, heterocyclic compound binding)
259	P30050	1	RPL12	60S ribosomal protein L12 OS=Homo sapiens GN=RPL12 PE=1 SV=1;Ribosomal protein L12 variant (Fragment) OS=Homo sapiens PE=2 SV=1	0.826087	1.65217	0.565217	EILGTAQSVGCNVDGR+HPHDIIDDINSGAVECPAS+IGPLGLSPK+QAQIEVVPSASALIIK		Binds directly to 26S ribosomal RNA.		GO:0000184 cellular processGO:0000027 cellular component organization or biogenesisGO:0006614 localizationGO:0006412 cellular processGO:0006413 cellular process	GO:0005829 (cytoplasm, intracellular) GO:0022625 (ribosome, intracellular) GO:0070062 (extracellular, extracellular exosome) GO:0005925 (other, anchoring junction) GO:0016020 (other) GO:0014069 (other, postsynapse)	GO:0003723 (binding, heterocyclic compound binding) GO:0019843 (binding, heterocyclic compound binding) GO:0003735 (structural molecule activity, structural constituent of ribosome)
260	P51885	1	Lum	Lumican OS=Mus musculus GN=Lum PE=1 SV=2	1.875	1.5625	1.375	CAPECNCPHSYPTAMYCDDLK+EDAVSASLK+FTGLQYLR+ILGPLSYSK+LDGNPLTQSSLPPDMYECLR+LPAGLPTSLLTLYLDNNK+SLEYLDLSFNQMSK+SLQDLQLTNNK	338			GO:0051216 developmental processGO:0030199 cellular component organization or biogenesisGO:0045944 regulationGO:0032914 regulationGO:0070848 response to stimulusGO:0014070 response to stimulusGO:0007601 interaction with cells and organisms	GO:0031012 (extracellular, extracellular matrix) GO:0005615 (extracellular, extracellular region part) GO:0005583 (extracellular, extracellular matrix)	GO:0005518 (binding, macromolecular complex binding)
261	Q794F9	1	Slc3a2	4F2 cell-surface antigen heavy chain OS=Rattus norvegicus GN=Slc3a2 PE=1 SV=1;4F2 cell-surface antigen heavy chain OS=Rattus norvegicus GN=Slc3a2 PE=1 SV=1;LLAT protein OS=Rattus leucopus GN=lLAT PE=2 SV=1	1.25	1.9375	1.5	DVELNELEPEKQPMNAADGAAAGEK+EALSSWLQDGVDGFQVR+GQNAWFLPPQADIVATK+GQNEDPGSLLTQFR+IGDLQAFVGPEAR+VGASNLPAGISLPASANLLLSTDSTR	527	Required for the function of light chain amino-acid transporters. Involved in sodium-independent, high-affinity transport of large neutral amino acids such as phenylalanine, tyrosine, leucine, arginine and tryptophan. Involved in guiding and targeting of LAT1 and LAT2 to the plasma membrane. When associated with SLC7A6 or SLC7A7 acts as an arginine/glutamine exchanger, following an antiport mecha…		GO:0005975 metabolic processGO:1903801 localizationGO:0015804 localizationGO:0015827 localization	GO:0016324 (plasma membrane, apical part of cell) GO:0016021 (other, membrane part) GO:0042470 (other intracellular organelles, intracellular) GO:0016020 (other) GO:0005886 (plasma membrane, cell periphery)	GO:0003824 (catalytic activity) GO:0015175 (transporter, substrate-specific transporter activity)
262	P09445	1	EEF2	Elongation factor 2 OS=Cricetulus griseus GN=EEF2 PE=1 SV=4	2.77778	5.88889	1.33333	ALLELQLEPEELYQTFQR+CELLYEGPPDDEAAMGIK+CLYASVLTAQPR+DSVVAGFQWATK+EGIPALDNFLDK+ETVSEESNVLCLSK+GHVFEESQVAGTPMFVVK+IWCFGPDGTGPNILTDITK+QAIAERIKPVLMMNK+VNFTVDQIR+YVEPIEDVPCGNIVGLVGVDQFLVK	858	Catalyzes the GTP-dependent ribosomal translocation step during translation elongation. During this step, the ribosome changes from the pre-translocational (PRE) to the post-translocational (POST) state as the newly formed A-site-bound peptidyl-tRNA and P-site-bound deacylated tRNA move to the P and E sites, respectively. Catalyzes the coordinated movement of the two tRNA molecules, the mRNA and …			GO:0005737 (cytoplasm, intracellular) GO:0005634 (nucleus, intracellular)	GO:0005525 (binding, carbohydrate derivative binding) GO:0003924 (catalytic activity, hydrolase activity) GO:0003746 (binding, heterocyclic compound binding)
263	Q61702	0.9991	Itih1	Inter-alpha-trypsin inhibitor heavy chain H1 OS=Mus musculus GN=Itih1 PE=1 SV=2;Inter-alpha-trypsin inhibitor heavy chain H1 OS=Mus musculus GN=Itih1 PE=1 SV=1;Itih1 protein OS=Mus musculus GN=Itih1 PE=2 SV=1;Inter-alpha trypsin inhibitor, heavy chain 1 (Fragment) OS=Mus musculus GN=Itih1 PE=2 SV=1	2.41667	3.58333	0.916667	DQAVLQK+EVAFDVEIPK+GLTDEDGLEPTIDKPLEDSQPLEMVGPR+LDAQASFLSEELAAQTIKK+NMEQFTIHITVGAQSK+RFSLAGATNLNGGLLR	907	May act as a carrier of hyaluronan in serum or as a binding protein between hyaluronan and other matrix protein, including those on cell surfaces in tissues to regulate the localization, synthesis and degradation of hyaluronan which are essential to cells undergoing biological processes.		GO:0030212 metabolic process	GO:0005576 (extracellular)	GO:0004867 (molecular function regulator, enzyme regulator activity)
264	P19945	1	Rplp0	60S acidic ribosomal protein P0 OS=Rattus norvegicus GN=Rplp0 PE=1 SV=2	0.882353	1.52941	2.47059	AFLADPSAFAAAAPVAAATTAAPAAAAAPAK+CFIVGADNVGSK+IIQLLDDYPK+TSFFQALGITTK+VLALSVETDYTFPLAEK	317	Ribosomal protein P0 is the functional equivalent of E.coli protein L10.		GO:0071320 cellular processGO:0071353 cellular processGO:1904628 cellular processGO:1904401 cellular processGO:0007595 regulationGO:0010269 response to stimulusGO:0042254 cellular component organization or biogenesis	GO:0005737 (cytoplasm, intracellular) GO:0036464 (nucleus, intracellular) GO:0022625 (ribosome, intracellular) GO:0030425 (other, cell projection) GO:0005783 (er, endomembrane system) GO:0016020 (other) GO:0005634 (nucleus, intracellular) GO:0014069 (other, postsynapse) GO:1990904 (nucleus, ribonucleoprotein complex)	GO:0042277 (binding, amide binding) GO:0003735 (structural molecule activity, structural constituent of ribosome)
265	Q62826	1	Hnrnpm	Heterogeneous nuclear ribonucleoprotein M OS=Rattus norvegicus GN=Hnrnpm PE=1 SV=4;Isoform 2 of Heterogeneous nuclear ribonucleoprotein M OS=Mus musculus GN=Hnrnpm;Heterogeneous nuclear ribonucleoprotein M OS=Mus musculus GN=Hnrnpm PE=1 SV=3;Uncharacterized protein OS=Mus musculus PE=2 SV=1;Heterogeneous nuclear ribonucleoprotein M OS=Mus musculus GN=Hnrnpm PE=1 SV=1;Heterogeneous nuclear ribonuc…	3.5	2.2	2.4	AFITNIPFDVK+GIGMGNLGPAGMGMEGIGFGINK+GNFGGSFAGSFGGAGGHAPGVAR+INEILSNALK+LGSTVFVANLDYK+MGAGLGHGMDR+MGAGMGFGLER+MGLAMGGAGGASFDR+MGLVMDR+MGPAMGPALGAGIER		Pre-mRNA binding protein, binds avidly to poly(G) and poly(U) RNA homopolymers. Involved in splicing. Acts as a receptor for carcinoembryonic antigen in Kupffer cells, may initiate a series of signaling events leading to tyrosine phosphorylation of proteins and induction of IL-1 alpha, IL-6, IL-10 and tumor necrosis factor alpha cytokines.		GO:1990831 cellular processGO:0071222 cellular processGO:0000398 cellular processGO:1904591 regulationGO:1900182 regulation	GO:0009986 (cell surface, cell surface) GO:0016363 (nucleus, intracellular) GO:0005681 (nucleus, intracellular)	GO:0048306 (binding, protein binding) GO:1990405 (binding, antigen binding) GO:0003723 (binding, heterocyclic compound binding)
266	P28665	1	Mug1	Murinoglobulin-1 OS=Mus musculus GN=Mug1 PE=1 SV=3	1.3125	0.75	3.1875	DELVLDK+DLAFTPEISWSLR+EGNTWLTAFVLK+GEAFMLK+GGFSSTQDTVVALDALSK+GGVDDEMTLSAYITMALLESSLPATHPVVSK+HGIPFFVK+MVLVPSQLYTETPEK+PSQLYTETPEK+QLSAFAIWVQTVPLTCNNPK+QMSFSLAAEPIQGPYK+RPEEPPR+SGFIPLKPTVK+TIQSTGSFSQK+VLIVEPEGIK+VPDTITEWK+YMVLVPSQL+YMVLVPSQLYTETPEK	203			GO:0014707 developmental processGO:1990830 cellular processGO:0060539 developmental processGO:0060021 developmental process	GO:0005654 (nucleus, intracellular)	GO:0046983 (binding, protein binding) GO:0000980 (binding, heterocyclic compound binding) GO:0001206 (nucleic acid binding transcription factor activity, transcription factor activity, sequence-specific DNA binding)
267	Q5BJY9	1	Krt18	Keratin, type I cytoskeletal 18 OS=Rattus norvegicus GN=Krt18 PE=1 SV=3	3.26667	0.533333	1.13333	DAETTLLELR+EIDLDSMKNQNINLENNLGEVEAR+IVLQIDNAR+LEAEIATYR+NQNINLENNLGEVEAR+QTQEYEALLNIK+TLQTLEIDLDSMK+VRPASSAASVYAGAGGSGSR+YWSQQIEESTTVVTTK	423	When phosphorylated, plays a role in filament reorganization. Involved in the delivery of mutated CFTR to the plasma membrane. Together with KRT8, is involved in interleukin-6 (IL-6)-mediated barrier protection (By similarity). Involved in the uptake of thrombin-antithrombin complexes by hepatic cells.		GO:0097191 regulationGO:0043000 cellular component organization or biogenesisGO:0097284 cellular processGO:0045104 cellular component organization or biogenesisGO:0043066 regulationGO:0033209 regulation	GO:0071944 (other, cell periphery) GO:0034451 (cytoskeleton, intracellular) GO:0005829 (cytoplasm, intracellular) GO:0045095 (cytoskeleton, intracellular) GO:0016363 (nucleus, intracellular) GO:0005730 (nucleus, intracellular)	GO:0097110 (binding, protein binding) GO:0005198 (structural molecule activity)
268	F6XRY2	1	EEF2	Uncharacterized protein OS=Canis familiaris GN=EEF2 PE=4 SV=1	2.77778	5.88889	1.33333	ALLELQLEPEELYQTFQR+CELLYEGPPDDEAAMGIK+CLYASVLTAQPR+DSVVAGFQWATK+EGIPALDNFLDK+ETVSEESNVLCLSK+GHVFEESQVAGTPMFVVK+QAIAERIKPVLMMNK+VNFTVDQIR+YVEPIEDVPCGNIVGLVGVDQFLVK	858			GO:0002244 cellular processGO:0045727 regulationGO:0006414 cellular process	GO:0016235 (other, intracellular) GO:0005829 (cytoplasm, intracellular) GO:0005886 (plasma membrane, cell periphery) GO:0005844 (nucleus, intracellular) GO:0045202 (other)	GO:0005525 (binding, carbohydrate derivative binding) GO:0003924 (catalytic activity, hydrolase activity) GO:0019901 (binding, protein binding)
269	P13995	0.9926	MTHFD2	Bifunctional methylenetetrahydrofolate dehydrogenase/cyclohydrolase, mitochondrial OS=Homo sapiens GN=MTHFD2 PE=1 SV=2;cDNA, FLJ93628, Homo sapiens methylene tetrahydrofolate dehydrogenase (NAD+dependent), methenyltetrahydrofolate cyclohydrolase (MTHFD2),nuclear gene encoding mitochondrial protein, mRNA OS=Homo sapiens PE=1 SV=1;Bifunctional methylenetetrahydrofolate dehydrogenase/cyclohydrolase,…	3.27273	2.63636	1.81818	AGYITPVPGGVGPMTVAMLMK+NEAVVISGR+NVVVAGR
270	P07872-2	1	Acox1	Isoform 2 of Peroxisomal acyl-coenzyme A oxidase 1 OS=Rattus norvegicus GN=Acox1;Acyl-coenzyme A oxidase OS=Rattus norvegicus GN=Acox1 PE=1 SV=3	1.45455	3.09091	3.54545	EIGTHKPLPGITVGDIGPK+GHPEPLDLHLGMFLPTLLHQATAEQQER+NLQTHVSHRK+TQEFILNSPTVTSIK		Catalyzes the desaturation of acyl-CoAs to 2-trans-enoyl-CoAs. Isoform 1 shows highest activity against medium-chain fatty acyl-CoAs and activity decreases with increasing chain length. Isoform 2 is active against a much broader range of substrates and shows activity towards very long-chain acyl-CoAs. Isoform 1 shows optimum activity with a chain length of 10 carbons while isoform 2 exhibits opti…	Acyl-CoA + O(2) = trans-2,3-dehydroacyl-CoA + H(2)O(2).	GO:0033539 cellular processGO:0033540 cellular processGO:0019395 cellular processGO:0006091 cellular processGO:0006629 metabolic processGO:0006693 cellular process	GO:0005782 (peroxisome/microbody, intracellular) GO:0005777 (peroxisome/microbody, intracellular)	GO:0003995 (catalytic activity, oxidoreductase activity) GO:0003997 (catalytic activity, oxidoreductase activity) GO:0071949 (binding, cofactor binding) GO:0005504 (binding, ion binding) GO:0050660 (binding, cofactor binding) GO:0016401 (catalytic activity, oxidoreductase activity) GO:0042803 (binding, protein binding)
271	Q8C4A5-2	1	Asxl3	Isoform 2 of Putative Polycomb group protein ASXL3 OS=Mus musculus GN=Asxl3;Putative Polycomb group protein ASXL3 OS=Mus musculus GN=Asxl3 PE=2 SV=3	1.86667	1.6	2.2	AQREAAAAAAVAAAASIVSGAMGSPGEGGK+EAAAAAAVAAAASIVSGAMGSPGEGGK+EAAAAAAVAAAASIVSGAMGSPGEGGKAR+EAAAAAAVAAAASIVSGAMGSPGEGGKARTLAHIK+EESIKLTSGPNHEGAEGSSSHGDSGIPGPSAQNALEEQQPK+EQLKAFALKNADFSSYLLSEPQKPFTQLAAQK+IMPSPEVK+QVTDEVSSTRDCSLTNTAVQSKLVSSFQQHTK		Putative Polycomb group (PcG) protein. PcG proteins act by forming multiprotein complexes, which are required to maintain the transcriptionally repressive state of homeotic genes throughout development. PcG proteins are not required to initiate repression, but to maintain it during later stages of development. They probably act via methylation of histones, rendering chromatin heritably changed in…		GO:0006355 regulationGO:0006351 cellular process	GO:0005634 (nucleus, intracellular)	GO:0003677 (binding, heterocyclic compound binding) GO:0046872 (binding, ion binding)
272	Q07936-2	1	Anxa2	Isoform Long of Annexin A2 OS=Rattus norvegicus GN=Anxa2;Annexin A2 OS=Rattus norvegicus GN=Anxa2 PE=1 SV=2	0.227273	2.40909	0.909091	DALNIETAIK+DIISDTSGEFRK+EDGSVIDYELIDQDAR+GLGTDEDSLIEIICSR+QDIAFAYQR+SALSGHLETVMLGLLK+SLYYFIQQDTK+STVHEILCK+SYSPYDMLESIR+TDLEKDIISDTSGEFR+WISIMTER		Calcium-regulated membrane-binding protein whose affinity for calcium is greatly enhanced by anionic phospholipids. It binds two calcium ions with high affinity. May be involved in heat-stress response. Inhibits PCSK9-enhanced LDLR degradation, probably reduces PCSK9 protein levels via a translational mechanism but also competes with LDLR for binding with PCSK9.		GO:0001525 developmental processGO:0007589 regulationGO:0052362 regulationGO:0030199 cellular component organization or biogenesisGO:0042730 regulationGO:0001765 cellular component organization or biogenesisGO:0052405 regulationGO:0044147 regulationGO:0032804 regulationGO:0036035 cellular processGO:0048146 regulationGO:1905581 regulationGO:1905597 regulationGO:1905599 regulationGO:0001934 regulat…	GO:0005604 (extracellular, extracellular matrix) GO:0016323 (plasma membrane, cell periphery) GO:0005938 (cytoplasm, cell periphery) GO:0009986 (cell surface, cell surface) GO:0005737 (cytoplasm, intracellular) GO:0005829 (cytoplasm, intracellular) GO:0005769 (endosome, endomembrane system) GO:0070062 (extracellular, extracellular exosome) GO:0019897 (plasma membrane, cell periphery) GO:0031902 (…	GO:0051015 (binding, macromolecular complex binding) GO:0044730 (binding, extracellular matrix binding) GO:0005509 (binding, ion binding) GO:0005544 (binding, ion binding) GO:0048306 (binding, protein binding) GO:0042802 (binding, protein binding) GO:0005546 (binding, ion binding) GO:0019834 (molecular function regulator, enzyme regulator activity) GO:0002020 (binding, protein binding) GO:0017137…
273	P85972	1	Vcl	Vinculin OS=Rattus norvegicus GN=Vcl PE=1 SV=1;Vinculin OS=Mus musculus GN=Vcl PE=1 SV=4;Vinculin OS=Rattus norvegicus GN=Vcl PE=1 SV=1;Vinculin OS=Rattus norvegicus GN=Vcl PE=1 SV=1	1.6875	1.1875	2.375	AIPDLTAPVAAVQAAVSNLVR+ALASQLQDSLK+AQQVSQGLDVLTAK+ELLPVLISAMK+LTDELAPPKPPLPEGEVPPPRPPPPEEKDEEFPEQK+LVQAAQMLQSDPYSVPAR+MLGQMTDQVADLR+MSAEINEIIR+MTGLVDEAIDTK+NQGIEEALK+QVATALQNLQTK+SLGEIAALTSK+TNISDEESEQATEMLVHNAQNLMQSVK+VLQLTSWDEDAWASK+WIDNPTVDDR	1066	Actin filament (F-actin)-binding protein involved in cell-matrix adhesion and cell-cell adhesion. Regulates cell-surface E-cadherin expression and potentiates mechanosensing by the E-cadherin complex. May also play important roles in cell morphology and locomotion.		GO:0007155 interaction with cells and organisms	GO:0005903 (other, cluster of actin-based cell projections) GO:0005925 (other, anchoring junction) GO:0090637 (other, inner dense plaque of desmosome) GO:0014704 (other, cell-cell junction) GO:0090636 (other, outer dense plaque of desmosome) GO:0042383 (plasma membrane, cell periphery) GO:1990357 (cytoskeleton, cell periphery) GO:0030018 (other intracellular organelles, intracellular) GO:0005915 …	GO:0051015 (binding, macromolecular complex binding) GO:0017048 (binding, protein binding) GO:0005198 (structural molecule activity)
274	Q60432	1	HYOU1	Hypoxia up-regulated protein 1 OS=Cricetulus griseus GN=HYOU1 PE=2 SV=1;Hypoxia up-regulated protein 1 OS=Mus musculus GN=Hyou1 PE=1 SV=1;Hypoxia up-regulated protein 1 OS=Cricetulus griseus GN=I79_020107 PE=3 SV=1	3.1875	1.625	0.4375	AANSLEAFIFETQDK+DAVIYPILVEFTR+EAGMQPQLQIR+EELGKNINADEAAAMGAVYQAAALSK+FLGDSAAGMAIK+LAVMSVDLGSESMK+LGNTISSLFGGGTSSDAK+LSATSTWLEDEGFGATTVMLK+NINADEAAAMGAVYQAAALSK+RAVLQAAR+TVLSANADHMAQIEGLMDDVDFK+VESVFETLVEDSPEEESTLTK+VLQLINDNTATALSYGVFR	999	Has a pivotal role in cytoprotective cellular mechanisms triggered by oxygen deprivation. May play a role as a molecular chaperone and participate in protein folding (By similarity).			GO:0005788 (er, endomembrane system)	GO:0005524 (binding, carbohydrate derivative binding)
275	O54734	1	Ddost	Dolichyl-diphosphooligosaccharide--protein glycosyltransferase 48 kDa subunit OS=Mus musculus GN=Ddost PE=1 SV=2;Dolichyl-diphosphooligosaccharide--protein glycosyltransferase 48 kDa subunit OS=Rattus norvegicus GN=Ddost PE=2 SV=1;Dolichyl-diphosphooligosaccharide--protein glycosyltransferase 48 kDa subunit OS=Cricetulus griseus GN=I79_007162 PE=3 SV=1;Dolichyl-diphosphooligosaccharide--protein g…	1.03571	0.535714	0.75	LPDVYGVFQFK+SSLNPILFR+TAVIDHHNYDVSDLGQHTLIVADTENLLK+VGPVSHHR+WVFKEEGVLR+YSQTGNYELAVALSR	441	Essential subunit of the N-oligosaccharyl transferase (OST) complex which catalyzes the transfer of a high mannose oligosaccharide from a lipid-linked oligosaccharide donor to an asparagine residue within an Asn-X-Ser/Thr consensus motif in nascent polypeptide chains. Required for the assembly of both SST3A- and SS3B-containing OST complexes. Required for efficient N-glycosylation.		GO:0006486 cellular processGO:0006487 cellular processGO:0018279 cellular processGO:0034097 response to stimulusGO:0042110 cellular process	GO:0005783 (er, endomembrane system) GO:0016021 (other, membrane part) GO:0043231 (other intracellular organelles, intracellular) GO:0008250 (er, endomembrane system) GO:0032991 (macromolecular complex)	GO:0004579 (catalytic activity, transferase activity)
276	P13383	1	Ncl	Nucleolin OS=Rattus norvegicus GN=Ncl PE=1 SV=3;Nucleolin-like protein OS=Rattus norvegicus PE=2 SV=1;Nucleolin OS=Rattus norvegicus GN=Ncl PE=1 SV=1	2.625	0.375	2.1875	FGYVDFESAEDLEK+GFGFVDFNSEEDAK+GLSEDTTEETLKESFEGSVR+NDLAAVDVR+NLSFNITEDELK+TLVLSNLSYSATEETLQEVFEK	713	Nucleolin is the major nucleolar protein of growing eukaryotic cells. It is found associated with intranucleolar chromatin and pre-ribosomal particles. It induces chromatin decondensation by binding to histone H1. It is thought to play a role in pre-rRNA transcription and ribosome assembly. May play a role in the process of transcriptional elongation. Binds RNA oligonucleotides with 5'-UUAGGG-3' …		GO:0071222 cellular processGO:0006897 localizationGO:0097421 developmental processGO:0043066 regulationGO:2000778 regulationGO:0032760 regulationGO:2000232 regulationGO:0007283 interaction with cells and organisms	GO:0009986 (cell surface, cell surface) GO:0005737 (cytoplasm, intracellular) GO:0001651 (nucleus, intracellular) GO:0001650 (nucleus, intracellular) GO:0005730 (nucleus, intracellular) GO:1990904 (nucleus, ribonucleoprotein complex)	GO:0005509 (binding, ion binding) GO:1990631 (binding, protein binding) GO:0042393 (binding, protein binding) GO:0043236 (binding, extracellular matrix binding) GO:0003723 (binding, heterocyclic compound binding) GO:0042134 (binding, heterocyclic compound binding) GO:0035368 (binding, heterocyclic compound binding) GO:0043565 (binding, heterocyclic compound binding) GO:0005102 (binding, protein b…
277	Q9Z2I9	1	Sucla2	Succinate--CoA ligase [ADP-forming] subunit beta, mitochondrial OS=Mus musculus GN=Sucla2 PE=1 SV=2;Succinate-CoA ligase subunit beta (Fragment) OS=Mus musculus GN=Sucla2 PE=2 SV=1;Succinate-CoA ligase subunit beta (Fragment) OS=Mus musculus GN=Sucla2 PE=2 SV=1	1.64	0.44	0.92	ALIADSGLK+AQVLAGGR+EPIDIVEGIK+MGFPSNIVDSAAENMIK+VQAILVNIFGGIMR	463	ATP-specific succinyl-CoA synthetase functions in the citric acid cycle (TCA), coupling the hydrolysis of succinyl-CoA to the synthesis of ATP and thus represents the only step of substrate-level phosphorylation in the TCA. The beta subunit provides nucleotide specificity of the enzyme and binds the substrate succinate, while the binding sites for coenzyme A and phosphate are found in the alpha s…	ATP + succinate + CoA = ADP + phosphate + succinyl-CoA.	GO:0006105 cellular processGO:0006104 cellular processGO:0006099 cellular process	GO:0005739 (mitochondria, intracellular) GO:0043209 (other, myelin sheath)	GO:0005524 (binding, carbohydrate derivative binding) GO:0000287 (binding, ion binding) GO:0004775 (catalytic activity, ligase activity) GO:0004774 (catalytic activity, ligase activity)
278	E9Q616	1	Ahnak	AHNAK nucleoprotein (desmoyokin) OS=Mus musculus GN=Ahnak PE=1 SV=1	1.64286	0.642857	0.25	AEGPEVSLPKADLDVSGPKVDIDVPDVNIEGPDAK+AGAISASGPELEGAGHSK+GAFDGSVPKIEGTLKGPEIDMK+GEGLDVNVTLPEGDISISGPKVNVEAPNVNMEGLGGKLK+GPGVDLPSVDLSMPKVSGPDLDMNLKGPSLK+GPQVSSSLNLDTSK+IEGSITGPSVEIGTPDVDVHGLGGKLNMPKMK+ISAPGVKMEGGSTEIGAQMPSLEGGLSTSDMK+ISMADVDLNVAAPK+ISMPDVDLNIK+ISMQDVDLSLGSCK+LPSGSGPASPTTGSAVDIR+TVIRLPSGSGPASPTTGSAVDIRAGAISASGPELEGAGHSK+VDIDVPDVNIEGPDAK+VDIDVPDVNIEGPEGK+VKADCDVSVPKVGGEIK+VKGDVDVSLPKV…	5656			GO:0051259 cellular component organization or biogenesisGO:0043484 regulationGO:1901385 regulation	GO:0015629 (cytoskeleton, intracellular) GO:0044291 (other, cell-cell junction) GO:0005911 (other, cell-cell junction) GO:0043034 (other intracellular organelles, intracellular) GO:0005737 (cytoplasm, intracellular) GO:0005829 (cytoplasm, intracellular) GO:0070062 (extracellular, extracellular exosome) GO:0045121 (other, membrane part) GO:0005634 (nucleus, intracellular) GO:0005886 (plasma membra…	GO:0044548 (binding, protein binding) GO:0097493 (structural molecule activity, structural molecule activity conferring elasticity)
279	P62830	1	Rpl23	60S ribosomal protein L23 OS=Mus musculus GN=Rpl23 PE=1 SV=1	1	0.684211	2.57895	ISLGLPVGAVINCADNTGAK+LPAAGVGDMVMATVK+NLYIISVK	140			GO:0072717 cellular processGO:0071157 regulationGO:0000122 regulationGO:1904667 regulationGO:2000059 regulationGO:0071158 regulationGO:0008284 regulationGO:0010628 regulationGO:1901798 regulationGO:0045944 regulationGO:0050821 regulationGO:0032986 cellular component organization or biogenesisGO:0006412 cellular process	GO:0005737 (cytoplasm, intracellular) GO:0022625 (ribosome, intracellular) GO:0022626 (ribosome, intracellular) GO:0005730 (nucleus, intracellular) GO:0005654 (nucleus, intracellular) GO:0014069 (other, postsynapse) GO:0032991 (macromolecular complex) GO:0005840 (ribosome, intracellular)	GO:0070180 (binding, heterocyclic compound binding) GO:0003735 (structural molecule activity, structural constituent of ribosome) GO:0001223 (binding, protein binding) GO:1990948 (molecular function regulator, enzyme regulator activity) GO:0031625 (binding, protein binding)
280	P51647	1	Aldh1a1	Retinal dehydrogenase 1 OS=Rattus norvegicus GN=Aldh1a1 PE=1 SV=3;Retinal dehydrogenase 1 OS=Rattus norvegicus GN=Aldh1a1 PE=1 SV=1	1.88235	1.41176	1.05882	ANNTTYGLAAGVFTK+EAGFPPGVVNIVPGYGPTAGAAISSHMDVDK+EEIFGPVQQIMK+GFFVQPTVFSNVTDEMR+IFINNEWHDSVSGK+ILDLIESGK+INNEWHDSVSGK+VFANAYLSDLGGSIK+VTLELGGK	501	Can convert/oxidize retinaldehyde to retinoic acid. Binds free retinal and cellular retinol-binding protein-bound retinal (PubMed:7832787). May have a broader specificity and oxidize other aldehydes in vivo (By similarity).	Retinal + NAD(+) + H(2)O = retinoate + NADH.	GO:0042905 regulationGO:0044849 interaction with cells and organismsGO:0001822 developmental processGO:0001889 developmental processGO:0007494 developmental processGO:0055114 metabolic processGO:0051289 cellular component organization or biogenesisGO:0042493 response to stimulusGO:0032355 response to stimulusGO:0045471 response to stimulusGO:0014070 response to stimulusGO:0006979 response to stim…	GO:0005737 (cytoplasm, intracellular) GO:0005829 (cytoplasm, intracellular) GO:0005634 (nucleus, intracellular)	GO:0004028 (catalytic activity, oxidoreductase activity) GO:0004029 (catalytic activity, oxidoreductase activity) GO:0018479 (catalytic activity, oxidoreductase activity) GO:0042802 (binding, protein binding) GO:0051287 (binding, cofactor binding) GO:0001758 (catalytic activity, oxidoreductase activity)
281	Q8BG05-2	1	Hnrnpa3	Isoform 2 of Heterogeneous nuclear ribonucleoprotein A3 OS=Mus musculus GN=Hnrnpa3;EG627828 protein OS=Mus musculus GN=Gm6793 PE=1 SV=1;Uncharacterized protein OS=Mus musculus GN=Gm9242 PE=4 SV=1;Heterogeneous nuclear ribonucleoprotein A3 OS=Mus musculus GN=Hnrnpa3 PE=2 SV=1	6.18182	0.818182	1.18182	DYFEKYGK+IETIEVMEDR+MEGHDPKEPEQLR+RAVSREDSVKPGAHLTVK+SSGSPYGGGYGSGGGSGGYGSR+WGTLTDCVVMR		Plays a role in cytoplasmic trafficking of RNA. Binds to the cis-acting response element, A2RE. May be involved in pre-mRNA splicing (By similarity).		GO:0006397 cellular processGO:0051028 localizationGO:0008380 cellular process	GO:0071013 (nucleus, intracellular) GO:0005737 (cytoplasm, intracellular) GO:1990124 (nucleus, intracellular) GO:0043005 (other, cell projection) GO:0005654 (nucleus, intracellular) GO:0005634 (nucleus, intracellular) GO:0035770 (nucleus, intracellular)	GO:0003729 (binding, heterocyclic compound binding) GO:0051033 (transporter, substrate-specific transporter activity)
282	E9QMD2	0.9983	Ube2ql1	Ubiquitin-conjugating enzyme E2Q-like protein 1 OS=Mus musculus GN=Ube2ql1 PE=3 SV=1	0.5	1.5	7	AAGARAGPGPAVAAAAAGGSLVPAAR+AGPGPAVAAAAAGGSLVPAARQQHCTQVR+DKQPQPAAGAAGAAGAGGPR+QPQPAAGAAGAAGAGGPRER+QPQPAAGAAGAAGAGGPRERAAGAR	304
283	P23565	0.7717	Ina	Alpha-internexin OS=Rattus norvegicus GN=Ina PE=1 SV=2;Alpha-internexin OS=Mus musculus GN=Ina PE=1 SV=3;Alpha-internexin-like protein OS=Cricetulus griseus GN=H671_3g8523 PE=3 SV=1;Alpha-internexin OS=Rattus norvegicus GN=Ina PE=1 SV=1;Putative uncharacterized protein (Fragment) OS=Mus musculus GN=Ina PE=2 SV=1	0.64	1.4	0.92	AQYESLAAK+EYQDLLNVK	505	Class-IV neuronal intermediate filament that is able to self-assemble. It is involved in the morphogenesis of neurons. It may form an independent structural network without the involvement of other neurofilaments or it may cooperate with NF-L to form the filamentous backbone to which NF-M and NF-H attach to form the cross-bridges (By similarity).		GO:0030154 cellular processGO:0007399 developmental processGO:0042246 developmental process	GO:0005883 (cytoskeleton, intracellular)	GO:0046982 (binding, protein binding) GO:0005198 (structural molecule activity)
284	A0A1L1SRW0	0.9342	Rpsa	40S ribosomal protein SA (Fragment) OS=Mus musculus GN=Rpsa PE=1 SV=1	6	1	5	FAAATGATPIAGR+FTPGTFTNQIQAAFR+RAVLKFAAATGATPIAGR+YVDIAIPCNNK	93			GO:0006412 cellular process	GO:0015935 (ribosome, intracellular)	GO:0003735 (structural molecule activity, structural constituent of ribosome)
285	P04792	0.9871	HSPB1	Heat shock protein beta-1 OS=Homo sapiens GN=HSPB1 PE=1 SV=2;cDNA FLJ52243, highly similar to Heat-shock protein beta-1 OS=Homo sapiens PE=2 SV=1;Heat shock protein beta-1 OS=Homo sapiens GN=HSPB1 PE=1 SV=1;Epididymis secretory protein Li 102 OS=Homo sapiens GN=HEL-S-102 PE=2 SV=1	4.42857	2.71429	4.71429	AQLGGPEAAK+GGPEAAK		Small heat shock protein which functions as a molecular chaperone probably maintaining denatured proteins in a folding-competent state (PubMed:10383393, PubMed:20178975). Plays a role in stress resistance and actin organization (PubMed:19166925). Through its molecular chaperone activity may regulate numerous biological processes including the phosphorylation and the axonal transport of neurofilam…		GO:0099641 cellular processGO:0035924 cellular processGO:0061077 cellular processGO:0035556 regulationGO:0043066 regulationGO:1902176 regulationGO:0006469 regulationGO:0070527 interaction with cells and organismsGO:0045766 regulationGO:0043536 regulationGO:2001028 regulationGO:0038033 regulationGO:0032731 regulationGO:0042535 regulationGO:0010506 regulationGO:0043122 regulationGO:0043488 regulati…	GO:1904115 (cytoplasm, cell projection) GO:0005737 (cytoplasm, intracellular) GO:0005856 (cytoskeleton, intracellular) GO:0005829 (cytoplasm, intracellular) GO:0070062 (extracellular, extracellular exosome) GO:0005615 (extracellular, extracellular region part) GO:0005925 (other, anchoring junction) GO:0005634 (nucleus, intracellular) GO:0005886 (plasma membrane, cell periphery) GO:0000502 (macrom…	GO:0042802 (binding, protein binding) GO:0044183 (binding, protein binding) GO:0042803 (binding, protein binding) GO:0019901 (binding, protein binding) GO:0005080 (binding, protein binding) GO:0008426 (molecular function regulator, enzyme regulator activity) GO:0003723 (binding, heterocyclic compound binding) GO:0043130 (binding, protein binding)
286	P80314	1	Cct2	T-complex protein 1 subunit beta OS=Mus musculus GN=Cct2 PE=1 SV=4;Chaperonin subunit 2 (Beta), isoform CRA_a OS=Mus musculus GN=Cct2 PE=1 SV=1;Brain cDNA, clone MNCb-1272, similar to Mus musculus chaperonin subunit 2 (beta) (Cct2), mRNA OS=Mus musculus GN=Cct2 PE=2 SV=1	4.66667	5.83333	4.33333	AGADEERAETAR+ASLSLAPVNIFK+FWQDLMNIAGTTLSSK+LAVEAVLR+LGGSLADSYLDEGFLLDK+LIEEVMIGEDK+MLPTIIADNAGYDSADLVAQLR+VQDDEVGDGTTSVTVLAAELLR	535	Component of the chaperonin-containing T-complex (TRiC), a molecular chaperone complex that assists the folding of proteins upon ATP hydrolysis. The TRiC complex mediates the folding of WRAP53/TCAB1, thereby regulating telomere maintenance. As part of the TRiC complex may play a role in the assembly of BBSome, a complex involved in ciliogenesis regulating transports vesicles to the cilia. The TRi…		GO:0006458 cellular processGO:0007339 cellular processGO:0051086 cellular processGO:0051131 cellular component organization or biogenesisGO:0061077 cellular processGO:1904851 regulationGO:0051973 regulationGO:1904874 regulationGO:0032212 regulationGO:0050821 regulationGO:0090666 localizationGO:1901998 localization	GO:0044297 (other, cell body) GO:0005832 (macromolecular complex, intracellular) GO:0005829 (cytoplasm, intracellular) GO:0005874 (cytoskeleton, intracellular) GO:0043209 (other, myelin sheath) GO:0002199 (macromolecular complex, protein complex)	GO:0005524 (binding, carbohydrate derivative binding) GO:0044183 (binding, protein binding) GO:0031625 (binding, protein binding) GO:0051082 (binding, protein binding)
287	A0A1U8C049	1	Rpl4	60S ribosomal protein L4 OS=Mesocricetus auratus GN=Rpl4 PE=4 SV=1	3	1	5	LDELYGTWR+NIPGITLLNVSK+NVTLPAVFK+QPYAVSELAGHQTSAESWGTGR+YAICSALAASALPALVMSK	327			GO:0006412 cellular process	GO:0005840 (ribosome, intracellular)	GO:0003735 (structural molecule activity, structural constituent of ribosome)
288	A0A061INB7	1	H671_1g2681	ADP/ATP translocase 2-like protein OS=Cricetulus griseus GN=H671_1g2681 PE=3 SV=1	3.9	2.5	1.9	AAYFGIYDTAK+DFLAGGVAAAISK+GTDIMYTGTLDCWR+YFPTQALNFAFK	256				GO:0016021 (other, membrane part) GO:0005743 (mitochondria, envelope)	GO:0022857 (transporter, transmembrane transporter activity)
289	F7DRJ3	1	HMGCS2	Uncharacterized protein OS=Macaca mulatta GN=HMGCS2 PE=4 SV=1;Putative uncharacterized protein OS=Macaca fascicularis GN=EGM_01014 PE=4 SV=1;Hydroxymethylglutaryl-CoA synthase, mitochondrial isoform 1 OS=Macaca mulatta GN=HMGCS2 PE=2 SV=1	1.47368	0.578947	1.94737	LEVGTETIIDK+LSIQCYLR+PTGGAGAVAMLIGP+PTGGAGAVAMLIGPK+YTVGLGQTR	466	This enzyme condenses acetyl-CoA with acetoacetyl-CoA to form HMG-CoA, which is the substrate for HMG-CoA reductase.	Acetyl-CoA + H(2)O + acetoacetyl-CoA = (S)-3-hydroxy-3-methylglutaryl-CoA + CoA.	GO:0008299 cellular processGO:0016126 metabolic process		GO:0004421 (catalytic activity, transferase activity)
290	Q8VIF7	1	Selenbp1	Selenium-binding protein 1 OS=Rattus norvegicus GN=Selenbp1 PE=1 SV=1;Selenium-binding protein 1 OS=Rattus norvegicus GN=Selenbp1 PE=1 SV=2	2.8	0.866667	1.2	DGFNPAHVEAGLYGSHIHVWDWQR+EEIVYLPCIYR+FLHDPDATQGFVGCALSSNIQR+GGFVLLDGETFEVK+GGSVQVLEDQELTCQPEPLVVK+LILPSIISSR+LNPNFLVDFGK+NTGIEAPDYLATVDVDPK	472	Catalyzes the oxidation of methanethiol, an organosulfur compound known to be produced in substantial amounts by gut bacteria (By similarity). Selenium-binding protein which may be involved in the sensing of reactive xenobiotics in the cytoplasm. May be involved in intra-Golgi protein transport (PubMed:10799528, PubMed:17377489).	Methanethiol + O(2) + H(2)O = formaldehyde + H(2)S + H(2)O(2).	GO:0015031 localization	GO:0005829 (cytoplasm, intracellular) GO:0016020 (other) GO:0005634 (nucleus, intracellular)	GO:0018549 (catalytic activity, oxidoreductase activity) GO:0008430 (binding, selenium binding)
291	Q8CCS6-2	0.99	Pabpn1	Isoform 2 of Polyadenylate-binding protein 2 OS=Mus musculus GN=Pabpn1;Polyadenylate-binding protein 2 OS=Mus musculus GN=Pabpn1 PE=1 SV=3;Polyadenylate-binding protein 2 OS=Mus musculus GN=Pabpn1 PE=1 SV=1	1.23077	3.23077	1.53846	AAAAAAAAAAGAAGGR+AAAAAAAAAAGAAGGRGSGPGR+AAAAAAAAAAGAAGGRGSGPGRR+LKELQNEVEKQMNMSPPPGNAGPVIMSLEEK+MAAAAAAAAAAGAAGGRGSGPGR+MAAAAAAAAAAGAAGGRGSGPGRR+QMNMSPPPGNAGPVIMSLEEKMEADAR+TSLALDESLFR		Involved in the 3'-end formation of mRNA precursors (pre-mRNA) by the addition of a poly(A) tail of 200-250 nt to the upstream cleavage product. Stimulates poly(A) polymerase (PAPOLA) conferring processivity on the poly(A) tail elongation reaction and controls also the poly(A) tail length. Increases the affinity of poly(A) polymerase for RNA. Is also present at various stages of mRNA metabolism i…		GO:0071222 cellular processGO:0000165 regulationGO:0006378 cellular processGO:0016973 localizationGO:1904247 regulation	GO:0005737 (cytoplasm, intracellular) GO:0042405 (nucleus, intracellular) GO:0016607 (nucleus, intracellular) GO:0005634 (nucleus, intracellular) GO:1990904 (nucleus, ribonucleoprotein complex)	GO:0008143 (binding, heterocyclic compound binding) GO:0043621 (binding, protein binding) GO:0070063 (binding, protein binding)
292	I0FH43	1	VCL	Vinculin isoform VCL OS=Macaca mulatta GN=VCL PE=2 SV=1;Vinculin isoform VCL OS=Macaca mulatta GN=VCL PE=2 SV=1	1.6875	1.1875	2.375	AIPDLTAPVAAVQAAVSNLVR+ALASQLQDSLK+AQQVSQGLDVLTAK+LVQAAQMLQSDPYSVPAR+MLGQMTDQVADLR+MTGLVDEAIDTK+TNISDEESEQATEMLVHNAQNLMQSVK+VAMANIQPQMLVAGATSIAR+VLQLTSWDEDAWASK	1066			GO:0007155 interaction with cells and organisms	GO:0005903 (other, cluster of actin-based cell projections) GO:0005623 (other) GO:0090637 (other, inner dense plaque of desmosome) GO:0090636 (other, outer dense plaque of desmosome) GO:0005886 (plasma membrane, cell periphery) GO:1990357 (cytoskeleton, cell periphery) GO:0005915 (other, anchoring junction)	GO:0051015 (binding, macromolecular complex binding) GO:0005198 (structural molecule activity)
293	P80317	1	Cct6a	T-complex protein 1 subunit zeta OS=Mus musculus GN=Cct6a PE=1 SV=3;T-complex protein 1 subunit zeta OS=Cricetulus griseus GN=I79_017661 PE=3 SV=1;Chaperonin containing Tcp1, subunit 6A (Zeta 1) OS=Rattus norvegicus GN=Cct6a PE=1 SV=1;Chaperonin containing Tcp1, subunit 6a (Zeta) OS=Mus musculus GN=Cct6a PE=2 SV=1;Putative uncharacterized protein OS=Mus musculus GN=Cct6a PE=2 SV=1;Putative unchar…	2.69231	2.23077	0.769231	AQAALAVNISAAR+AQLGVQAFADALLIIPK+GIDPFSLDALAK+VLAQNSGFDLQETLVK	531	Component of the chaperonin-containing T-complex (TRiC), a molecular chaperone complex that assists the folding of proteins upon ATP hydrolysis. The TRiC complex mediates the folding of WRAP53/TCAB1, thereby regulating telomere maintenance. The TRiC complex plays a role in the folding of actin and tubulin.		GO:0006458 cellular processGO:0007339 cellular processGO:0061077 cellular processGO:1904851 regulationGO:0032212 regulationGO:0050821 regulationGO:1901998 localization	GO:0001669 (other intracellular organelles, endomembrane system) GO:0044297 (other, cell body) GO:0005832 (macromolecular complex, intracellular) GO:0005829 (cytoplasm, intracellular) GO:0005874 (cytoskeleton, intracellular) GO:0002199 (macromolecular complex, protein complex)	GO:0005524 (binding, carbohydrate derivative binding) GO:0044183 (binding, protein binding) GO:0051082 (binding, protein binding) GO:0071987 (binding, protein binding)
294	B9EK92	0.9996	Rasip1	Ras interacting protein 1 OS=Mus musculus GN=Rasip1 PE=2 SV=1	0.113208	0.603774	0.169811	AASGGAALASPGPGSGSGTPTGSGGK+AASGGAALASPGPGSGSGTPTGSGGKER+ISQLFRGSGAGGAGGPGTPGGAQR+QPENHPEGVPEAPLTPEAVSVELRPLILWMANTTELLSFVQEK+RISQLFRGSGAGGAGGPGTPGGAQR+SRAASGGAALASPGPGSGSGTPTGSGGK+SRAASGGAALASPGPGSGSGTPTGSGGKER	961			GO:0007165 regulation
295	Q5GH64	0.9982	Xkr7	XK-related protein 7 OS=Mus musculus GN=Xkr7 PE=2 SV=1	1.05556	1.16667	2.33333	AAKSDGAAAVAGPGPEGPAGADR+AAKSDGAAAVAGPGPEGPAGADRGGAGGR+MAAKSDGAAAVAGPGPEGPAGADR+SDGAAAVAGPGPEGPAGADRGGAGGR+SLPRTTGTERDGVAVGGER	580				GO:0016021 (other, membrane part)
296	F1PGY9	1	DYNC1H1	Uncharacterized protein OS=Canis familiaris GN=DYNC1H1 PE=4 SV=2	3.5	2.08333	1.41667	AKEALELTDTGLLSGSEE+DSAIQQQVANLQMK+EALELTDTGLLSGSEER+EDEGEEAASPMLQIQ+EFGPVVIDY+FTQDTQPHYIYSPR+GEAVDEGEIAENLPEQEILIQSVCETMVPK+HLRKLVPLLLEDGGEAPAALEAALEEK+IFVFEPPPGVK+LAETVFNFQEK+LNTQEIFDDWAR+MLSAVSQQVQCIQEALR+QALETVNDYNPLMK+QTDVLQQLSIQMANAK+SMANPPA+SSLQSQCLNEVLK+VAAPDVVVPTLDTVR+VTDFGDKVEDPTFLNQLQSGVNR	4646			GO:0031122 cellular component organization or biogenesisGO:0033962 cellular component organization or biogenesisGO:0051293 cellular component organization or biogenesisGO:0072382 cellular processGO:0032388 regulationGO:1905832 regulationGO:0090235 regulationGO:0060236 regulationGO:0034063 cellular component organization or biogenesis	GO:0005813 (cytoskeleton, intracellular) GO:0005737 (cytoplasm, intracellular) GO:0005868 (cytoskeleton, intracellular) GO:0030175 (other, cell projection) GO:0005874 (cytoskeleton, intracellular)	GO:0005524 (binding, carbohydrate derivative binding) GO:0008569 (catalytic activity, hydrolase activity) GO:0045505 (binding, protein binding) GO:0045503 (binding, protein binding) GO:0051959 (binding, protein binding)
297	F6VUB3	1	DYNC1H1	Uncharacterized protein OS=Macaca mulatta GN=DYNC1H1 PE=4 SV=1;Uncharacterized protein (Fragment) OS=Macaca mulatta GN=EGK_18558 PE=4 SV=1;Putative uncharacterized protein (Fragment) OS=Macaca fascicularis GN=EGM_16969 PE=4 SV=1;Cytoplasmic dynein 1 heavy chain 1 OS=Macaca mulatta GN=DYNC1H1 PE=2 SV=1	3.5	2.08333	1.41667	AKEALELTDTGLLSGSEE+DSAIQQQVANLQMK+EALELTDTGLLSGSEER+EFGPVVIDY+FTQDTQPHYIYSPR+GEAVDEGEIAENLPEQEILIQSVCETMVPK+IFVFEPPPGVK+LAETVFNFQEK+LNTQEIFDDWAR+MLSAVSQQVQCIQEALR+QALETVNDYNPLMK+QTDVLQQLSIQMANAK+SMANPPA+SSLQSQCLNEVLK+VAAPDVVVPTLDTVR+VTDFGDKVEDPTFLNQLQSGVNR	4635			GO:0031122 cellular component organization or biogenesisGO:0051293 cellular component organization or biogenesisGO:0072382 cellular processGO:0032388 regulationGO:1905832 regulationGO:0090235 regulationGO:0060236 regulation	GO:0005813 (cytoskeleton, intracellular) GO:0005868 (cytoskeleton, intracellular) GO:0005874 (cytoskeleton, intracellular)	GO:0005524 (binding, carbohydrate derivative binding) GO:0008569 (catalytic activity, hydrolase activity) GO:0045505 (binding, protein binding) GO:0045503 (binding, protein binding) GO:0051959 (binding, protein binding)
298	Q61764	0.9997	Krt2	Keratin (Fragment) OS=Mus musculus GN=Krt2 PE=2 SV=1	2.81818	1.54545	3.72727	GGGGGGGSSYGSGGRSSGSRGSGSGSGGGGYSSGGGSR+GGSGGGGASSGGGSRGGSSSGGGSR+GGSGGGGASSGGGSRGGSSSGGGSRGGSSSGGGGYSSGGGSR+GGSGGGYGSGGGSGSGGGYSSGGGSR+GGSGGGYGSGGGSGSGGGYSSGGGSRGGSGGGGASSGGGSR+GGSGGGYGSGGGSGSGGGYSSGGGSRGGSGGGGASSGGGSRGGSSSGGGSR+GGSGGGYGSGGGSRGGSGGGYGSGGGSGSGGGYSSGGGSR+GGSGGGYGSGGGSRGGSGGGYGSGGGSGSGGGYSSGGGSRGGSGGGGASSGGGSR+GGSSSGGGGYSSGGGSRGGSSSGGQDLALK+GGSSSGGGSRGGSSSGGGGYSSGGGSR+GSGSGSGGGGYSSG…	270				GO:0005882 (cytoskeleton, intracellular)	GO:0005198 (structural molecule activity)
299	P13803	1	Etfa	Electron transfer flavoprotein subunit alpha, mitochondrial OS=Rattus norvegicus GN=Etfa PE=1 SV=4	2.09091	1.27273	4.72727	APSSSSAGISEWLDQK+GLLPEELTPLILETQK+LGGEVSCLVAGTK+LNVAPVSDIIEIK+QFSYTHICAGASAFGK+QSTLVIAEHANDSLAPITLNTITAAGR+TIYAGNALCTVK+VFSVRGTSFEAAAASGGSASSEK+VVPEMTEILK		Heterodimeric electron transfer flavoprotein that accepts electrons from several mitochondrial dehydrogenases, including acyl-CoA dehydrogenases, glutaryl-CoA and sarcosine dehydrogenase (PubMed:7334008). It transfers the electrons to the main mitochondrial respiratory chain via ETF-ubiquinone oxidoreductase (ETF dehydrogenase) (Probable). Required for normal mitochondrial fatty acid oxidation an…		GO:0033539 cellular process		GO:0009055 (electron carrier activity) GO:0050660 (binding, cofactor binding) GO:0016491 (catalytic activity, oxidoreductase activity)
300	F7EV45	1	VDAC2	Uncharacterized protein OS=Macaca mulatta GN=VDAC2 PE=2 SV=1;Uncharacterized protein OS=Macaca mulatta GN=VDAC2 PE=4 SV=1;Uncharacterized protein OS=Macaca mulatta GN=VDAC2 PE=4 SV=1;Macaca fascicularis brain cDNA clone: QorA-10692, similar to human voltage-dependent anion channel 2 (VDAC2), mRNA, RefSeq: NM_003375.2 OS=Macaca fascicularis PE=2 SV=1	3.11111	3.66667	2.33333	LTFDTTFSPNTGK+LTLSALVDGK+TGDFQLHTNVNDGTEFGGSIYQK+VNNSSLIGVGYTQTLRPGVK+WCEYGLTFTEK+WNTDNTLGTEIAIEDQICQGLK+YQLDPTASISAK	294			GO:0007339 cellular processGO:2001243 regulationGO:0032272 regulation	GO:0001669 (other intracellular organelles, endomembrane system) GO:0042645 (mitochondria, intracellular) GO:0005741 (mitochondria, envelope) GO:0043209 (other, myelin sheath)	GO:0008308 (transporter, substrate-specific transporter activity)
301	E2R948	1	VDAC2	Uncharacterized protein OS=Canis familiaris GN=VDAC2 PE=4 SV=2	3.11111	3.66667	2.33333	LTFDTTFSPNTGK+LTLSALVDGK+TGDFQLHTNVNDGTEFGGSIYQK+VNNSSLIGVGYTQTLRPGVK+WCEYGLTFTEK+WNTDNTLGTEIAIEDQICQGLK+YQLDPTASISAK	294			GO:0007339 cellular processGO:2001243 regulationGO:0032272 regulation	GO:0001669 (other intracellular organelles, endomembrane system) GO:0070382 (other intracellular organelles, endomembrane system) GO:0042645 (mitochondria, intracellular) GO:0005741 (mitochondria, envelope) GO:0043209 (other, myelin sheath)	GO:0008308 (transporter, substrate-specific transporter activity)
302	P56522	1	Fdxr	NADPH:adrenodoxin oxidoreductase, mitochondrial OS=Rattus norvegicus GN=Fdxr PE=1 SV=1	1.26087	0.869565	1.26087	AVPTGDVEDLPCGLLLSSVGY+AVPTGDVEDLPCGLLLSSVGYK+EMIQLPGTQPILDPSDFLGLQDR+GPTGVITTTMTDSFLTSQVLLK+LAPDLSCDTAVILGQGNVALDVAR+NVINTFTQTAR+STQETTPQICVVGSGPAGFYTAQHLLK+TDITEVALGVLR+VVNAPGLYCSGWVK	494	Serves as the first electron transfer protein in all the mitochondrial P450 systems including cholesterol side chain cleavage in all steroidogenic tissues, steroid 11-beta hydroxylation in the adrenal cortex, 25-OH-vitamin D3-24 hydroxylation in the kidney, and sterol C-27 hydroxylation in the liver.	2 reduced adrenodoxin + NADP(+) = 2 oxidized adrenodoxin + NADPH.	GO:0008203 metabolic processGO:0070995 cellular processGO:0006744 cellular process	GO:0005743 (mitochondria, envelope) GO:0005739 (mitochondria, intracellular)	GO:0070402 (binding, cofactor binding) GO:0015039 (catalytic activity, oxidoreductase activity)
303	Q99623-2	1	PHB2	Isoform 2 of Prohibitin-2 OS=Homo sapiens GN=PHB2;Prohibitin-2 OS=Homo sapiens GN=PHB2 PE=1 SV=2;cDNA FLJ60175, highly similar to Prohibitin-2 OS=Homo sapiens PE=2 SV=1;Prohibitin-2 (Fragment) OS=Homo sapiens GN=PHB2 PE=1 SV=1;Prohibitin-2 OS=Homo sapiens GN=PHB2 PE=1 SV=1;Prohibitin-2 (Fragment) OS=Homo sapiens GN=PHB2 PE=1 SV=2;Prohibitin-2 OS=Homo sapiens GN=PHB2 PE=1 SV=2	4.66667	1.22222	4.22222	DLQMVNISLR+ESVFTVEGGHR+FNASQLITQR+VLPSIVNEVLK+VLSRPNAQELPSMYQR		Acts as a mediator of transcriptional repression by nuclear hormone receptors via recruitment of histone deacetylases (By similarity). Functions as an estrogen receptor (ER)-selective coregulator that potentiates the inhibitory activities of antiestrogens and represses the activity of estrogens. Competes with NCOA1 for modulation of ER transcriptional activity. Probably involved in regulating mit…		GO:0071277 cellular processGO:0071456 cellular processGO:0071300 cellular processGO:0060749 developmental processGO:0060744 developmental processGO:0006851 localizationGO:0007005 cellular component organization or biogenesisGO:0043066 regulationGO:0043433 regulationGO:0033147 regulationGO:0033600 regulationGO:0045892 regulationGO:1902808 regulationGO:0051091 regulationGO:0070374 regulationGO:0031…	GO:0030424 (other, cell projection) GO:0071944 (other, cell periphery) GO:0009986 (cell surface, cell surface) GO:0005737 (cytoplasm, intracellular) GO:0098982 (other, GABA-ergic synapse) GO:0098978 (other, glutamatergic synapse) GO:0005743 (mitochondria, envelope) GO:0005741 (mitochondria, envelope) GO:0005739 (mitochondria, intracellular) GO:0016363 (nucleus, intracellular) GO:0005634 (nucleus,…	GO:0033218 (binding, amide binding) GO:0030331 (binding, protein binding) GO:0008022 (binding, protein binding) GO:0047485 (binding, protein binding)
304	P48735-2	1	IDH2	Isoform 2 of Isocitrate dehydrogenase [NADP], mitochondrial OS=Homo sapiens GN=IDH2;Isocitrate dehydrogenase [NADP], mitochondrial OS=Homo sapiens GN=IDH2 PE=1 SV=2;Isocitrate dehydrogenase 2 (NADP+), mitochondrial variant (Fragment) OS=Homo sapiens PE=2 SV=1	1.25	1.55	0.95	AEAAHGTVTR+DQTDDQVTIDSALATQK+IIWQFIK+LIDDMVAQVLK+NILGGTVFR+NYDGDVQSDILAQGFGSLGLMTSVLVCPDGK+VCVETVESGAMTK+YFDLGLPNR		Plays a role in intermediary metabolism and energy production. It may tightly associate or interact with the pyruvate dehydrogenase complex.	Isocitrate + NADP(+) = 2-oxoglutarate + CO(2) + NADPH.	GO:0006103 cellular processGO:0005975 metabolic processGO:0006097 cellular processGO:0006102 cellular processGO:0006741 cellular processGO:1903976 regulationGO:0060253 regulationGO:1904465 regulationGO:0006099 cellular process	GO:0005829 (cytoplasm, intracellular) GO:0070062 (extracellular, extracellular exosome) GO:0005759 (mitochondria, intracellular) GO:0005739 (mitochondria, intracellular) GO:0005777 (peroxisome/microbody, intracellular)	GO:0004450 (catalytic activity, oxidoreductase activity) GO:0000287 (binding, ion binding) GO:0051287 (binding, cofactor binding)
305	Q6P502	1	Cct3	T-complex protein 1 subunit gamma OS=Rattus norvegicus GN=Cct3 PE=1 SV=1;T-complex protein 1 subunit gamma OS=Cricetulus griseus GN=I79_009604 PE=3 SV=1	1.5	1.78571	2.28571	AVAQALEVIPR+DMMLNIINSSITTK+ELGIWEPLAVK+IPGGIIEDSCVLR+IVLLDSSLEYK+NVLLDPQLVPGGGASEMAVAHALTEK+PVLVLSQNTKRES+WSSLACNIALDAVK	545	Component of the chaperonin-containing T-complex (TRiC), a molecular chaperone complex that assists the folding of proteins upon ATP hydrolysis. The TRiC complex mediates the folding of WRAP53/TCAB1, thereby regulating telomere maintenance. As part of the TRiC complex may play a role in the assembly of BBSome, a complex involved in ciliogenesis regulating transports vesicles to the cilia. The TRi…		GO:0006458 cellular processGO:0007339 cellular processGO:0061077 cellular processGO:0046931 cellular component organization or biogenesisGO:1904851 regulationGO:0032212 regulationGO:0050821 regulationGO:1901998 localization	GO:0044297 (other, cell body) GO:0005832 (macromolecular complex, intracellular) GO:0005874 (cytoskeleton, intracellular) GO:0043209 (other, myelin sheath) GO:0005886 (plasma membrane, cell periphery) GO:0002199 (macromolecular complex, protein complex)	GO:0005524 (binding, carbohydrate derivative binding) GO:0044183 (binding, protein binding) GO:0051082 (binding, protein binding)
306	P00388	0.9999	Por	NADPH--cytochrome P450 reductase OS=Rattus norvegicus GN=Por PE=1 SV=3	1.7	0.5	1.75	FAVFGLGNKTYEHFNAMGK+GMSADPEEYDLADLSSLPEIDK+HILAILQDYPSLRPPIDHLCELLPR+IQTTAPPVK+LSKDAHR+NPFLAAVTANR+NPFLAAVTANRK+SADPEEYDLADLSSLPEIDK+SDEDYLYREELAR+SGRVNKGVATSWLR+TYEHFNAMGK	678	This enzyme is required for electron transfer from NADP to cytochrome P450 in microsomes. It can also provide electron transfer to heme oxygenase and cytochrome B5.	NADPH + n oxidized hemoprotein = NADP(+) + n reduced hemoprotein.	GO:0009437 cellular processGO:0090346 cellular processGO:0071372 cellular processGO:0071371 cellular processGO:0071375 cellular processGO:0070988 metabolic processGO:0019395 cellular processGO:0009812 metabolic processGO:0018393 cellular processGO:0043066 regulationGO:0043154 regulationGO:0060192 regulationGO:0043602 cellular processGO:0046210 cellular processGO:0055114 metabolic processGO:004554…	GO:0005789 (er, endomembrane system) GO:0016021 (other, membrane part) GO:0043231 (other intracellular organelles, intracellular) GO:0016020 (other) GO:0005739 (mitochondria, intracellular)	GO:0004128 (catalytic activity, oxidoreductase activity) GO:0009055 (electron carrier activity) GO:0019899 (binding, protein binding) GO:0050660 (binding, cofactor binding) GO:0010181 (binding, carbohydrate derivative binding) GO:0016787 (catalytic activity, hydrolase activity) GO:0047726 (catalytic activity, oxidoreductase activity) GO:0050661 (binding, cofactor binding) GO:0003958 (catalytic ac…
307	Q91V92	1	Acly	ATP-citrate synthase OS=Mus musculus GN=Acly PE=1 SV=1;ATP-citrate synthase OS=Mus musculus GN=Acly PE=2 SV=1;ATP-citrate synthase OS=Mus musculus GN=Acly PE=1 SV=1	3.625	0.8125	0.8125	AFDSGIIPMEFVNK+AISEQTGK+AIVWGMQTR+DGVYILDLAAK+DLVSSLTSGLLTIGDR+DYQGPLK+EILIPVFK+GAIVPAQEVPPPTVPMDYSWAR+GQELIYAGMPITEVFK+HLLVHAPEDK+IGNTGGMLDNILASK+KPASFMTSICDER+LGLVGVNLSLDGVK+LIMGIGHR+SGGMSNELNNIISR	1091	ATP-citrate synthase is the primary enzyme responsible for the synthesis of cytosolic acetyl-CoA in many tissues. Has a central role in de novo lipid synthesis. In nervous tissue it may be involved in the biosynthesis of acetylcholine (By similarity).	ADP + phosphate + acetyl-CoA + oxaloacetate = ATP + citrate + CoA.	GO:0006085 cellular processGO:0006084 cellular processGO:0006101 cellular processGO:0006633 cellular processGO:0008610 metabolic processGO:0006107 cellular process	GO:0009346 (macromolecular complex, intracellular) GO:0005829 (cytoplasm, intracellular) GO:0005739 (mitochondria, intracellular) GO:0005654 (nucleus, intracellular) GO:0005886 (plasma membrane, cell periphery)	GO:0005524 (binding, carbohydrate derivative binding) GO:0003878 (catalytic activity, transferase activity) GO:0048037 (binding, cofactor binding) GO:0046872 (binding, ion binding)
308	Q9JLJ3	1	Aldh9a1	4-trimethylaminobutyraldehyde dehydrogenase OS=Rattus norvegicus GN=Aldh9a1 PE=1 SV=1;4-trimethylaminobutyraldehyde dehydrogenase OS=Rattus norvegicus GN=Aldh9a1 PE=1 SV=1	2.30769	3.76923	0.615385	ANDTTFGLAAGVFTR+CQVLLEAAR+DEIAIMETINNGK+EVNLAVENAK+MGPLINAPHLER+VSFTGSVPTGMK+VTIEYYSQLK	494	Converts gamma-trimethylaminobutyraldehyde into gamma-butyrobetaine.	An aldehyde + NAD(+) + H(2)O = a carboxylate + NADH.	GO:0045329 cellular processGO:0001822 developmental processGO:0001889 developmental process	GO:0005829 (cytoplasm, intracellular)	GO:0047105 (catalytic activity, oxidoreductase activity) GO:0004029 (catalytic activity, oxidoreductase activity) GO:0043176 (binding, amine binding) GO:0019145 (catalytic activity, oxidoreductase activity) GO:0043878 (catalytic activity, oxidoreductase activity) GO:0051287 (binding, cofactor binding) GO:0042803 (binding, protein binding)
309	E2R546	1	RPL4	Uncharacterized protein OS=Canis familiaris GN=RPL4 PE=4 SV=2;Uncharacterized protein OS=Canis familiaris GN=RPL4 PE=4 SV=2;Uncharacterized protein OS=Canis familiaris GN=LOC100856765 PE=4 SV=1;Uncharacterized protein OS=Canis familiaris PE=4 SV=1	3	1	5	NIPGITLLNVSK+NVTLPAVFK+QPYAVSELAGHQTSAESWGTGR+YAICSALAASALPALVMSK	412			GO:0006412 cellular process	GO:0005840 (ribosome, intracellular)	GO:0003735 (structural molecule activity, structural constituent of ribosome)
310	Q6PCU8	0.7031	Ndufv3	NADH dehydrogenase [ubiquinone] flavoprotein 3, mitochondrial OS=Rattus norvegicus GN=Ndufv3 PE=3 SV=1;NADH dehydrogenase [ubiquinone] flavoprotein 3, mitochondrial OS=Mus musculus GN=Ndufv3 PE=1 SV=1;NADH dehydrogenase (Ubiquinone) flavoprotein 3-like, isoform CRA_a OS=Rattus norvegicus GN=Ndufv3 PE=1 SV=1;MIPP65 OS=Rattus norvegicus GN=Ndufv3 PE=2 SV=1;NADH dehydrogenase [ubiquinone] flavoprote…	0.1875	0.25	1.6875	LPQPSSGR	108	Accessory subunit of the mitochondrial membrane respiratory chain NADH dehydrogenase (Complex I), that is believed not to be involved in catalysis. Complex I functions in the transfer of electrons from NADH to the respiratory chain. The immediate electron acceptor for the enzyme is believed to be ubiquinone. May be the terminally assembled subunit of Complex I.		GO:0055114 metabolic process	GO:0005747 (mitochondria, envelope) GO:0005739 (mitochondria, intracellular)
311	P12110-2	1	COL6A2	Isoform 2C2A of Collagen alpha-2(VI) chain OS=Homo sapiens GN=COL6A2;Isoform 2C2A' of Collagen alpha-2(VI) chain OS=Homo sapiens GN=COL6A2;Collagen alpha-2(VI) chain OS=Homo sapiens GN=COL6A2 PE=1 SV=4	1.23529	1.94118	1.52941	NFVINVVNR+NLEWIAGGTWTPSALK+YGGLHFSDQVEVFSPPGSDR		Collagen VI acts as a cell-binding protein.		GO:0007155 interaction with cells and organismsGO:0030198 cellular component organization or biogenesisGO:0070208 cellular component organization or biogenesisGO:0009749 response to stimulus	GO:0005581 (macromolecular complex, protein complex) GO:0005788 (er, endomembrane system) GO:0070062 (extracellular, extracellular exosome) GO:0031012 (extracellular, extracellular matrix) GO:0005576 (extracellular) GO:0005615 (extracellular, extracellular region part) GO:1903561 (extracellular, extracellular organelle) GO:0032991 (macromolecular complex) GO:0042383 (plasma membrane, cell periphe…	GO:0030020 (structural molecule activity, extracellular matrix structural constituent)
312	D3ZQ57	0.9776	Plxnb2	Plexin B2 OS=Rattus norvegicus GN=Plxnb2 PE=1 SV=1	2.4	5.7	0.9	ALYAVFSR+FAMIVIAEPLR+HQVEKGPVDAVQK+LSVSPLPTLAK+RINTLMHYNVR+SFLINFIHTLENQR	1841			GO:0007420 developmental processGO:0007156 interaction with cells and organismsGO:0007162 interaction with cells and organismsGO:0001843 developmental processGO:0007405 cellular processGO:0050772 regulationGO:0008360 regulationGO:0043087 regulationGO:2001222 regulationGO:0001932 regulation	GO:0005887 (plasma membrane, cell periphery)	GO:0017154 (molecular transducer activity, receptor activity)
313	Q8BT09	1		40S ribosomal protein S6 OS=Mus musculus PE=2 SV=1	0.303571	0.25	0.232143	DIPGLTDTTVPR+ENKEEAAEYAKLLAK+ISGGNDKQGFPMKQGVLTHGR+LNISFPATGCQK+MATEVAADALGEEWK	249			GO:0006412 cellular process	GO:0005840 (ribosome, intracellular)	GO:0003735 (structural molecule activity, structural constituent of ribosome)
314	Q61990-2	1	Pcbp2	Isoform 2 of Poly(rC)-binding protein 2 OS=Mus musculus GN=Pcbp2;Isoform 3 of Poly(rC)-binding protein 2 OS=Mus musculus GN=Pcbp2;Poly(rC)-binding protein 2 OS=Mus musculus GN=Pcbp2 PE=1 SV=1;Poly(RC) binding protein 2 OS=Mus musculus GN=Pcbp2 PE=2 SV=1;Putative uncharacterized protein OS=Mus musculus GN=Pcbp2 PE=2 SV=1;Putative uncharacterized protein OS=Mus musculus GN=Pcbp2 PE=2 SV=1	8.33333	0.333333	1.44444	AITIAGIPQSIIECVK+ESTGAQVQVAGDMLPNSTER+IITLAGPTNAIFK+INISEGNCPER+LVVPASQCGSLIGK		Single-stranded nucleic acid binding protein that binds preferentially to oligo dC. Major cellular poly(rC)-binding protein. Binds also poly(rU). Negatively regulates cellular antiviral responses mediated by MAVS signaling. It acts as an adapter between MAVS and the E3 ubiquitin ligase ITCH, therefore triggering MAVS ubiquitinationa and degradation (By similarity).		GO:0051607 immune system processGO:0045087 immune system processGO:0075522 cellular processGO:0050687 regulationGO:0043161 cellular processGO:0039694 cellular process	GO:0005737 (cytoplasm, intracellular) GO:0005829 (cytoplasm, intracellular) GO:0005654 (nucleus, intracellular) GO:0005634 (nucleus, intracellular)	GO:1990829 (binding, heterocyclic compound binding) GO:0003677 (binding, heterocyclic compound binding) GO:0019899 (binding, protein binding) GO:0003723 (binding, heterocyclic compound binding) GO:0031625 (binding, protein binding)
315	Q01205	1	Dlst	Dihydrolipoyllysine-residue succinyltransferase component of 2-oxoglutarate dehydrogenase complex, mitochondrial OS=Rattus norvegicus GN=Dlst PE=1 SV=2;Dihydrolipoamide S-succinyltransferase (E2 component of 2-oxo-glutarate complex), isoform CRA_a OS=Rattus norvegicus GN=Dlst PE=1 SV=1;Gene OS=Rattus norvegicus GN=Dlst PE=4 SV=1	2.875	7.375	1.25	AAPEAPAAPPPPVAPVPTQMPPVPSPSQPPSSKPVSAIKPTAAPPLAEAGAAK+ASAFALQEQPVVNAVIDDATK+GLVVPVIR+VEGGTPLFTLR	454	Dihydrolipoamide succinyltransferase (E2) component of the 2-oxoglutarate dehydrogenase complex (By similarity). The 2-oxoglutarate dehydrogenase complex catalyzes the overall conversion of 2-oxoglutarate to succinyl-CoA and CO(2) (By similarity). The 2-oxoglutarate dehydrogenase complex is mainly active in the mitochondrion. A fraction of the 2-oxoglutarate dehydrogenase complex also localizes i…	Succinyl-CoA + enzyme N(6)-(dihydrolipoyl)lysine = CoA + enzyme N(6)-(S-succinyldihydrolipoyl)lysine.	GO:0006103 cellular processGO:0033512 cellular processGO:0006734 cellular processGO:0006104 cellular processGO:0006099 cellular process	GO:0043231 (other intracellular organelles, intracellular) GO:0005759 (mitochondria, intracellular) GO:0005739 (mitochondria, intracellular) GO:0005634 (nucleus, intracellular) GO:0045252 (macromolecular complex, intracellular) GO:0005886 (plasma membrane, cell periphery)	GO:0051087 (binding, protein binding) GO:0004149 (catalytic activity, transferase activity) GO:0031072 (binding, protein binding)
316	P29401-2	1	TKT	Isoform 2 of Transketolase OS=Homo sapiens GN=TKT;Transketolase OS=Homo sapiens GN=TKT PE=1 SV=3;Transketolase OS=Homo sapiens GN=TKT PE=1 SV=1;Transketolase OS=Homo sapiens PE=2 SV=1;cDNA FLJ56274, highly similar to Transketolase (EC 2.2.1.1) OS=Homo sapiens PE=2 SV=1;Transketolase (Fragment) OS=Homo sapiens PE=2 SV=1;Transketolase OS=Homo sapiens GN=HEL107 PE=2 SV=1	4.44444	4	1.44444	AVELAANTK+GITGVEDKESWHGKPLPK+ILATPPQEDAPSVDIANIR+LDNLVAILDINR+NSTFSEIFK+TVPFCSTFAAFFTR+VLDPFTIKPLDR		Catalyzes the transfer of a two-carbon ketol group from a ketose donor to an aldose acceptor, via a covalent intermediate with the cofactor thiamine pyrophosphate.	Sedoheptulose 7-phosphate + D-glyceraldehyde 3-phosphate = D-ribose 5-phosphate + D-xylulose 5-phosphate.	GO:0046166 cellular processGO:0006098 cellular processGO:0009052 cellular processGO:0040008 regulationGO:0005999 metabolic process	GO:0005829 (cytoplasm, intracellular) GO:0070062 (extracellular, extracellular exosome) GO:0043209 (other, myelin sheath) GO:0016604 (nucleus, intracellular) GO:0016607 (nucleus, intracellular) GO:0005654 (nucleus, intracellular) GO:0005777 (peroxisome/microbody, intracellular) GO:0031982 (other, membrane-bounded organelle)	GO:0048037 (binding, cofactor binding) GO:0046872 (binding, ion binding) GO:0042803 (binding, protein binding) GO:0004802 (catalytic activity, transferase activity)
317	P04104	0.988	Krt1	Keratin, type II cytoskeletal 1 OS=Mus musculus GN=Krt1 PE=1 SV=4	3	0.882353	1.05882	GGGGSR+GGGSGGGRYGGGGSYGGGSGGGSYGGSSGGGGSGGSYGGGSGGGSYGGGSGGGSSGSHR+GGSGGGGGSSGGSYGGSSGGGR+GGSGGGGGSSGGSYGGSSGGGRGGSSSGGGGVK+RSGGGGGGRFSGGGFCGSSGSGFGSK+YGGGGSYGGGSGGGSYGGSSGGGGSGGSYGGGSGGGSYGGGSGGGSSGSHR	637	May regulate the activity of kinases such as PKC and SRC via binding to integrin beta-1 (ITB1) and the receptor of activated protein C kinase 1 (RACK1). In complex with C1QBP is a high affinity receptor for kininogen-1/HMWK (By similarity).		GO:0001867 regulationGO:0061436 regulationGO:0050728 regulationGO:0018149 cellular processGO:0051290 cellular component organization or biogenesis	GO:0001533 (plasma membrane, cell periphery) GO:0031012 (extracellular, extracellular matrix) GO:0045095 (cytoskeleton, intracellular) GO:0016020 (other)	GO:0030246 (binding, carbohydrate binding) GO:0046982 (binding, protein binding) GO:0030280 (structural molecule activity, structural constituent of epidermis)
318	G3V9R8	1	Hnrnpc	Heterogeneous nuclear ribonucleoprotein C OS=Rattus norvegicus GN=Hnrnpc PE=1 SV=2;Isoform C1 of Heterogeneous nuclear ribonucleoproteins C1/C2 OS=Mus musculus GN=Hnrnpc;Isoform 3 of Heterogeneous nuclear ribonucleoproteins C1/C2 OS=Mus musculus GN=Hnrnpc;Isoform 4 of Heterogeneous nuclear ribonucleoproteins C1/C2 OS=Mus musculus GN=Hnrnpc;Isoform 5 of Heterogeneous nuclear ribonucleoproteins C1/…	0.666667	1	0.7	AAVAGEDGRMIAGQVLDINLAAEPK+MIAGQVLDINLAAEPK+VDSLLESLEK+VFIGNLNTLVVK	298	Binds pre-mRNA and nucleates the assembly of 40S hnRNP particles. Interacts with poly-U tracts in the 3'-UTR or 5'-UTR of mRNA and modulates the stability and the level of translation of bound mRNA molecules. Single HNRNPC tetramers bind 230-240 nucleotides. Trimers of HNRNPC tetramers bind 700 nucleotides. May play a role in the early steps of spliceosome assembly and pre-mRNA splicing. N6-methy…		GO:0000398 cellular processGO:0090367 regulation	GO:1990826 (nucleus, intracellular) GO:0005634 (nucleus, intracellular) GO:0005681 (nucleus, intracellular)	GO:1990827 (binding, protein binding) GO:0004857 (molecular function regulator, enzyme regulator activity) GO:0003729 (binding, heterocyclic compound binding) GO:1990247 (binding, heterocyclic compound binding) GO:0019904 (binding, protein binding) GO:0043021 (binding, macromolecular complex binding)
319	P24008-2	0.9864	Srd5a1	Isoform Short of 3-oxo-5-alpha-steroid 4-dehydrogenase 1 OS=Rattus norvegicus GN=Srd5a1;3-oxo-5-alpha-steroid 4-dehydrogenase 1 OS=Rattus norvegicus GN=Srd5a1 PE=1 SV=2	4.625	0.5	6.375	KILIPFVL+QHHQWYHEK+QHHQWYHEKFEDYPK+TLVFPVLIR+YSPQWPGIR		Converts testosterone into 5-alpha-dihydrotestosterone and progesterone or corticosterone into their corresponding 5-alpha-3-oxosteroids. It plays a central role in sexual differentiation and androgen physiology.	A 3-oxo-5-alpha-steroid + NADP(+) = a 3-oxo-Delta(4)-steroid + NADPH.	GO:0006702 regulationGO:0006710 regulationGO:0008209 regulationGO:0060348 developmental processGO:0030154 cellular processGO:0071320 cellular processGO:0071549 cellular processGO:0071872 cellular processGO:0071392 cellular processGO:0071363 cellular processGO:0032869 cellular processGO:0071407 cellular processGO:0009267 cellular processGO:0071394 cellular processGO:0021987 developmental processGO…	GO:0070852 (other, cell projection) GO:0005737 (cytoplasm, intracellular) GO:0005789 (er, endomembrane system) GO:0016021 (other, membrane part) GO:0043231 (other intracellular organelles, intracellular) GO:0043209 (other, myelin sheath) GO:0043025 (other, cell body) GO:0031090 (other, organelle membrane) GO:0048471 (nucleus, intracellular)	GO:0003865 (catalytic activity, oxidoreductase activity) GO:0033218 (binding, amide binding) GO:0047751 (catalytic activity, oxidoreductase activity) GO:0070402 (binding, cofactor binding)
320	O08629	1	Trim28	Transcription intermediary factor 1-beta OS=Rattus norvegicus GN=Trim28 PE=1 SV=2	4.25	6	1.375	ADVQSIIGLQR+FSAVLVEPPPLNLPSAGLSSQELSGPGDGP+IVAERPGTNSTGPGPMAPPR+LDLDLTSDSQPPVFK+LSPPYSSPQEFAQDVGR+QGSGSSQPMEVQEGYGFGTDDPYSSAEPHVSGMK	835	Nuclear corepressor for KRAB domain-containing zinc finger proteins (KRAB-ZFPs). Mediates gene silencing by recruiting CHD3, a subunit of the nucleosome remodeling and deacetylation (NuRD) complex, and SETDB1 (which specifically methylates histone H3 at 'Lys-9' (H3K9me)) to the promoter regions of KRAB target genes. Enhances transcriptional repression by coordinating the increase in H3K9me, the d…	S-ubiquitinyl-[E2 ubiquitin-conjugating enzyme]-L-cysteine + [acceptor protein]-L-lysine = [E2 ubiquitin-conjugating enzyme]-L-cysteine + N(6)-ubiquitinyl-[acceptor protein]-L-lysine.	GO:0006325 cellular component organization or biogenesisGO:0060028 developmental processGO:0043045 cellular processGO:0006281 cellular processGO:0007566 developmental processGO:0060669 developmental processGO:0001837 cellular processGO:0045087 immune system processGO:1901536 regulationGO:0045869 regulationGO:0000122 regulationGO:1902187 regulationGO:0043388 regulationGO:0045739 regulationGO:00903…	GO:0005719 (chromosome, intracellular) GO:0005720 (chromosome, intracellular) GO:0005654 (nucleus, intracellular) GO:0005634 (nucleus, intracellular) GO:0090575 (nucleus, intracellular)	GO:0070087 (binding, protein binding) GO:0003700 (nucleic acid binding transcription factor activity, transcription factor activity, sequence-specific DNA binding) GO:0035851 (binding, protein binding) GO:1990841 (binding, chromatin binding) GO:0004672 (catalytic activity, transferase activity) GO:0043565 (binding, heterocyclic compound binding) GO:0003713 (transcription factor activity, protein …
321	Q3TEA8-2	1	Hp1bp3	Isoform 2 of Heterochromatin protein 1-binding protein 3 OS=Mus musculus GN=Hp1bp3;Isoform 3 of Heterochromatin protein 1-binding protein 3 OS=Mus musculus GN=Hp1bp3;Heterochromatin protein 1-binding protein 3 OS=Mus musculus GN=Hp1bp3 PE=1 SV=1;Heterochromatin protein 1-binding protein 3 OS=Mus musculus GN=Hp1bp3 PE=1 SV=1;Heterochromatin protein 1-binding protein 3 OS=Mus musculus GN=Hp1bp3 PE=…	2.52941	1.17647	1.05882	GQLEQITGK+LEDVLPLAFTR+MDAILTEAIK+NGWLEQISGK+QTPMASSPRPK+TIPAWATLSASQLAR		Component of heterochromatin that maintains heterochromatin integrity during G1/S progression and regulates the duration of G1 phase to critically influence cell proliferative capacity. May play a role in hypoxia-induced oncogenesis.		GO:0071456 cellular processGO:0070828 cellular component organization or biogenesisGO:0006334 cellular component organization or biogenesisGO:0042127 regulationGO:0097298 regulationGO:0006355 regulation	GO:0005694 (chromosome, intracellular) GO:0016607 (nucleus, intracellular) GO:0000786 (chromosome, intracellular) GO:0005634 (nucleus, intracellular)	GO:0003677 (binding, heterocyclic compound binding) GO:0031491 (binding, chromatin binding)
322	J9P4F3	1	VCL	Uncharacterized protein OS=Canis familiaris GN=VCL PE=4 SV=1	1.6875	1.1875	2.375	AIPDLTAPVAAVQAAVSNLVR+ALASQLQDSLK+AQQVSQGLDVLTAK+LVQAAQMLQSDPYSVPAR+MTGLVDEAIDTK+TNISDEESEQATEMLVHNAQNLMQSVK+VAMANIQPQMLVAGATSIAR+VLQLTSWDEDAWASK	1074			GO:0034333 cellular component organization or biogenesisGO:0043297 cellular component organization or biogenesisGO:0048675 cellular component organization or biogenesisGO:0090136 interaction with cells and organismsGO:0030032 cellular component organization or biogenesisGO:0002009 developmental processGO:0034394 localizationGO:0030334 regulation	GO:0005903 (other, cluster of actin-based cell projections) GO:0005623 (other) GO:0043034 (other intracellular organelles, intracellular) GO:0005916 (other, anchoring junction) GO:0005925 (other, anchoring junction) GO:0090637 (other, inner dense plaque of desmosome) GO:0090636 (other, outer dense plaque of desmosome) GO:0005886 (plasma membrane, cell periphery) GO:0002102 (cytoskeleton, intracel…	GO:0051015 (binding, macromolecular complex binding) GO:0045294 (binding, protein binding) GO:0002162 (binding, carbohydrate derivative binding) GO:0005198 (structural molecule activity) GO:0031625 (binding, protein binding)
323	A0A1U7QR10	1	Hmgcs2	3-hydroxy-3-methylglutaryl coenzyme A synthase OS=Mesocricetus auratus GN=Hmgcs2 PE=3 SV=1;3-hydroxy-3-methylglutaryl coenzyme A synthase OS=Cricetulus griseus GN=I79_012582 PE=3 SV=1	1.58333	2.25	3.5	LEVGTETIIDK+PTGGAGAVAMLIGP+PTGGAGAVAMLIGPK+YTVGLGQTR	508	This enzyme condenses acetyl-CoA with acetoacetyl-CoA to form HMG-CoA, which is the substrate for HMG-CoA reductase.	Acetyl-CoA + H(2)O + acetoacetyl-CoA = (S)-3-hydroxy-3-methylglutaryl-CoA + CoA.	GO:0008299 cellular processGO:0016126 metabolic process	GO:0005739 (mitochondria, intracellular)	GO:0004421 (catalytic activity, transferase activity)
324	F7HJP9	1	SPTAN1	Uncharacterized protein OS=Macaca mulatta GN=SPTAN1 PE=4 SV=1;Uncharacterized protein OS=Macaca mulatta GN=SPTAN1 PE=4 SV=1;Uncharacterized protein OS=Macaca mulatta GN=SPTAN1 PE=4 SV=1;Uncharacterized protein OS=Macaca mulatta GN=EGK_07310 PE=4 SV=1;Putative uncharacterized protein OS=Macaca fascicularis GN=EGM_06630 PE=4 SV=1;Spectrin alpha chain, brain isoform 1 OS=Macaca mulatta GN=SPTAN1 PE=…	4.07692	0.923077	1.76923	DLASVQALLR+DLSSVQTLLTK+EAALTSEEVGADLEQV+GVIDMGNSLIER+LEESLEYQQFVANVEEEEAWINEK+MTLVASEDYGDTLAAIQGLLK+QEAFLLNEDLGDSLDSVEALLK+QETFDAGLQAFQQEGIANITALK+QETFDAGLQAFQQEGIANITALKDQLLAAK+SSLSSAQADFNQLAELDR	2411					GO:0005509 (binding, ion binding)
325	A0A1U7R454	1	Sptan1	spectrin alpha chain, non-erythrocytic 1 isoform X2 OS=Mesocricetus auratus GN=Sptan1 PE=4 SV=1;spectrin alpha chain, non-erythrocytic 1 isoform X4 OS=Mesocricetus auratus GN=Sptan1 PE=4 SV=1;spectrin alpha chain, non-erythrocytic 1 isoform X3 OS=Mesocricetus auratus GN=Sptan1 PE=4 SV=1;spectrin alpha chain, non-erythrocytic 1 isoform X1 OS=Mesocricetus auratus GN=Sptan1 PE=4 SV=1;Spectrin alpha …	4.07692	0.923077	1.76923	DLASVQALLR+DLSSVQTLLTK+GVIDMGNSLIER+LEESLEYQQFVANVEEEEAWINEK+MTLVASEDYGDTLAAIQGLLK+QEAFLLNEDLGDSLDSVEALLK+QETFDAGLQAFQQEGIANITALK+QETFDAGLQAFQQEGIANITALKDQLLAAK+SSLSSAQADFNQLAELDR	2477					GO:0005509 (binding, ion binding)
326	Q7TP38	1	Psme3	Amine oxidase OS=Rattus norvegicus GN=Psme3 PE=2 SV=1	0.4	0.875	0.225	ALDPALWTIQK+IQILSFAGKPLPQESPIEK+KLLETEEEAAFPLGNATPR+NLGTLLGLGLALNSSMYR+WCERPEWVHLDTTPFASLFK	1640			GO:0009308 metabolic process	GO:0016021 (other, membrane part) GO:0008537 (macromolecular complex, intracellular)	GO:0005507 (binding, ion binding) GO:0008131 (catalytic activity, oxidoreductase activity) GO:0048038 (binding, cofactor binding)
327	P15090	1	FABP4	Fatty acid-binding protein, adipocyte OS=Homo sapiens GN=FABP4 PE=1 SV=3;Epididymis secretory protein Li 104 OS=Homo sapiens GN=FABP4 PE=2 SV=1	0.857143	1.04762	1.90476	EVGVGFATR+KREDDKLVVECVMK+LVSSENFDDYMK	132	Lipid transport protein in adipocytes. Binds both long chain fatty acids and retinoic acid. Delivers long-chain fatty acids and retinoic acid to their cognate receptors in the nucleus.		GO:0050873 cellular processGO:0071285 cellular processGO:0071356 cellular processGO:0042632 regulationGO:0001816 interaction with cells and organismsGO:0015909 localizationGO:0006469 regulationGO:0045892 regulationGO:0050729 regulationGO:0009617 response to stimulusGO:0019433 cellular processGO:0050872 cellular process	GO:0005737 (cytoplasm, intracellular) GO:0005829 (cytoplasm, intracellular) GO:0070062 (extracellular, extracellular exosome) GO:0005811 (other intracellular organelles, intracellular) GO:0005634 (nucleus, intracellular)	GO:0005504 (binding, ion binding) GO:0051427 (binding, protein binding) GO:0036041 (binding, ion binding) GO:0005324 (transporter, substrate-specific transporter activity)
328	A2AHG0	0.9998	Lzts3	Leucine zipper putative tumor suppressor 3 OS=Mus musculus GN=Lzts3 PE=1 SV=1	2.25	3.625	5.625	APADLASEGPKLEDPPAPHLFGK+ERGAAGGSSTPTPQHGEEK+GGLDKSRTMTPAGGSGGGLSDSGR+GSDHTDVCGNVVGSSGGSSSSGGSDK+QAGVAAAASLVSVDGEVEAGGEGGTR+QAGVAAAASLVSVDGEVEAGGEGGTRALR+RQAGVAAAASLVSVDGEVEAGGEGGTRALR+SVGTRTGGGGNQGSFPGPRSGGSGANR		May be involved in promoting the maturation of dendritic spines, probably via regulating SIPA1L1 levels at the postsynaptic density of synapses.		GO:0051260 cellular component organization or biogenesisGO:0061001 regulation	GO:0030054 (other) GO:0005737 (cytoplasm, intracellular) GO:0005856 (cytoskeleton, intracellular) GO:0043197 (other, cell projection) GO:0014069 (other, postsynapse) GO:0045211 (plasma membrane, cell periphery) GO:0045202 (other)	GO:0030165 (binding, protein binding) GO:0043621 (binding, protein binding)
329	P62320	1	Snrpd3	Small nuclear ribonucleoprotein Sm D3 OS=Mus musculus GN=Snrpd3 PE=1 SV=1;RCG60635, isoform CRA_b OS=Rattus norvegicus GN=Snrpd3 PE=1 SV=1;Small nuclear ribonucleoprotein D3 OS=Mus musculus GN=Snrpd3 PE=2 SV=1	2.21429	1.85714	1.71429	FLILPDMLK+SIGVPIK+VAQLEQVYIR	126	Core component of the spliceosomal U1, U2, U4 and U5 small nuclear ribonucleoproteins (snRNPs), the building blocks of the spliceosome. Thereby, plays an important role in the splicing of cellular pre-mRNAs. Most spliceosomal snRNPs contain a common set of Sm proteins SNRPB, SNRPD1, SNRPD2, SNRPD3, SNRPE, SNRPF and SNRPG that assemble in a heptameric protein ring on the Sm site of the small nucle…		GO:0006479 cellular processGO:0000245 cellular component organization or biogenesisGO:0000387 cellular component organization or biogenesis	GO:0071013 (nucleus, intracellular) GO:0000243 (nucleus, intracellular) GO:0005737 (cytoplasm, intracellular) GO:0005829 (cytoplasm, intracellular) GO:0034709 (macromolecular complex, intracellular) GO:0016604 (nucleus, intracellular) GO:0005654 (nucleus, intracellular) GO:0005634 (nucleus, intracellular) GO:0034715 (macromolecular complex, intracellular) GO:0071011 (nucleus, intracellular) GO:00…	GO:0019899 (binding, protein binding) GO:0071208 (binding, heterocyclic compound binding) GO:0003723 (binding, heterocyclic compound binding) GO:0070034 (binding, heterocyclic compound binding) GO:1990446 (binding, macromolecular complex binding) GO:0030620 (binding, heterocyclic compound binding) GO:0071209 (binding, heterocyclic compound binding)
330	Q61147	1	Cp	Ceruloplasmin OS=Cricetulus griseus GN=Cp PE=1 SV=2;Ceruloplasmin OS=Mus musculus GN=Cp PE=1 SV=1;Ceruloplasmin OS=Mus musculus GN=Cp PE=1 SV=1;Ceruloplasmin OS=Mus musculus GN=Cp PE=1 SV=1	1.625	0.75	0.75	AGLQAFFQVR+DIASGLIGPLILCK+DIFTGLIGPMK+EDEDFQESNK+EMGPTYADPVCLSK+ETFTYEWTVPK+HYFIGITEAVWDYASGTEEKK+IWAEVGDTIK+IYHSHVDAPK+MYSINGYTFGSLPGLSMCAADR+QFTDSSFR+WYLFGMGNEVDVHSAFFHGQALTSR+YYSGVDPTK	1061	Ceruloplasmin is a blue, copper-binding (6-7 atoms per molecule) glycoprotein. It has ferroxidase activity oxidizing Fe(2+) to Fe(3+) without releasing radical oxygen species. It is involved in iron transport across the cell membrane. Provides Cu(2+) ions for the ascorbate-mediated deaminase degradation of the heparan sulfate chains of GPC1. May also play a role in fetal lung development or pulmo…	4 Fe(2+) + 4 H(+) + O(2) = 4 Fe(3+) + 2 H(2)O.	GO:0006879 regulationGO:0006825 localizationGO:0046688 response to stimulus	GO:0046658 (plasma membrane, cell periphery) GO:0005615 (extracellular, extracellular region part)	GO:0051087 (binding, protein binding) GO:0005507 (binding, ion binding) GO:0004322 (catalytic activity, oxidoreductase activity)
331	Q64446	0.9994	Atp7b	Copper-transporting ATPase 2 OS=Mus musculus GN=Atp7b PE=1 SV=2;Copper-transporting ATPase 2 OS=Mus musculus GN=Atp7b PE=1 SV=1	4	2.5	4	KPGSIVIAGSINAHGSVLLK+KVAMVGDGVNDSPALAQADVGIAIGTGTDVAIEAADVVLIR+NFKSGNSVPQTMGDIAGSVQK+TSEALAKLMSLQATEATVVTLGEDNLILREEQVPMELVQR+VEGMTCQSCVSSIEGK+VNLVLALIYNMVGIPIAAGVFMPIGIVLQPWMGSAAMAASSVSVVLSSLQLK+YEAQAHGRMKPLSASQVSVHIGMDDR	1462	Copper ion transmembrane transporter involved in the export of copper out of the cells, such as the efflux of hepatic copper into the bile.	ATP + H(2)O + Cu(+)(Side 1) = ADP + phosphate + Cu(+)(Side 2).	GO:0006878 regulationGO:0071280 cellular processGO:0071287 cellular processGO:0006882 regulationGO:0060003 localizationGO:0015677 localizationGO:0006825 localizationGO:0015680 localizationGO:0007595 regulationGO:0046688 response to stimulusGO:0051208 regulation	GO:0045177 (other, apical part of cell) GO:0016323 (plasma membrane, cell periphery) GO:0005923 (other, cell-cell junction) GO:0005783 (er, endomembrane system) GO:0005794 (other intracellular organelles, endomembrane system) GO:0016021 (other, membrane part) GO:0005770 (endosome, endomembrane system) GO:0016020 (other) GO:0070160 (other, cell-cell junction) GO:0048471 (nucleus, intracellular) GO…	GO:0005524 (binding, carbohydrate derivative binding) GO:0005507 (binding, ion binding) GO:0005375 (transporter, substrate-specific transporter activity) GO:0004008 (catalytic activity, hydrolase activity) GO:0043682 (catalytic activity, hydrolase activity) GO:0008270 (binding, ion binding)
332	Q63010	0.9927		Liver carboxylesterase B-1 OS=Rattus norvegicus PE=1 SV=1;Carboxylic ester hydrolase OS=Rattus norvegicus GN=Ces1f PE=1 SV=3;Carboxylic ester hydrolase OS=Rattus norvegicus GN=Ces1f PE=1 SV=2	1.77778	0.611111	2.11111	FAPPQPAEPWSFVK+FWANFAR+LKAEEVAFWTQLLAK+RQPQPHHNEL+VHLQFSEDCLYLNIYTPADFTK	561	Involved in the detoxification of xenobiotics and in the activation of ester and amide prodrugs.	A carboxylic ester + H(2)O = an alcohol + a carboxylate.		GO:0005788 (er, endomembrane system)	GO:0052689 (catalytic activity, hydrolase activity)
333	E9Q6Y8	1	Usp31	Ubiquitin-specific peptidase 31 OS=Mus musculus GN=Usp31 PE=1 SV=1	0.9375	1.3125	3	AGGGGGAGGPGPAAPSSPSSAR+AGGGGGAGGPGPAAPSSPSSARSVGSFMSR+AGGGGGAGGPGPAAPSSPSSARSVGSFMSRVLK+KPESTTKSSPSSKGTSEPEK+LFRSGRAGGGGGAGGPGPAAPSSPSSAR+MSKVTAPGPGPPVAAGGKEK+SGRAGGGGGAGGPGPAAPSSPSSAR+SGRAGGGGGAGGPGPAAPSSPSSARSVGSFMSR+SSQLDSGAPLSPSSR+VLKTLSTLSHLSSEGAAPDR+VLKTLSTLSHLSSEGAAPDRGGLR	1344			GO:0016579 cellular processGO:0006511 cellular process	GO:0005634 (nucleus, intracellular)	GO:0004843 (catalytic activity, hydrolase activity)
334	A0A0C6E3V3	0.9998	HC	HC protein OS=Mus musculus GN=HC PE=2 SV=1;Monoclonal 11D8 anti-human butyrylcholinesterase (BChE) heavy chain OS=Mus musculus PE=2 SV=1	0.823529	1	2.41176	ATLTADK+DVLTITLTPK+VNSAAFPAPIEK+VTCVVVDISK	463
335	P07861	0.9958	Mme	Neprilysin OS=Rattus norvegicus GN=Mme PE=1 SV=2;Neprilysin OS=Mus musculus GN=Mme PE=1 SV=3;Neprilysin-like protein OS=Cricetulus griseus GN=H671_1g2013 PE=4 SV=1;Neprilysin-like protein OS=Cricetulus griseus GN=H671_1g2013 PE=4 SV=1;Neprilysin OS=Rattus norvegicus GN=Mme PE=4 SV=1	0.8	1.12	1.08	DELEVILK+DLQNLMSWR+FIMDLVSSLSR+IIGTLQNSAEFADAFHCR+IIGTLQNSAEFADAFHCRK+YSNFDILR	750	Thermolysin-like specificity, but is almost confined on acting on polypeptides of up to 30 amino acids. Biologically important in the destruction of opioid peptides such as Met- and Leu-enkephalins by cleavage of a Gly-Phe bond. Able to cleave angiotensin-1, angiotensin-2 and angiotensin 1-9. Displays UV-inducible elastase activity toward skin preelastic and elastic fibers (By similarity). Involv…	Preferential cleavage of polypeptides between hydrophobic residues, particularly with Phe or Tyr at P1'.	GO:0097242 interaction with cells and organismsGO:0050435 cellular processGO:0071345 cellular processGO:0071492 cellular processGO:0071493 cellular processGO:0046449 cellular processGO:0001822 developmental processGO:0006518 cellular processGO:0006508 metabolic processGO:0090399 cellular processGO:0019233 interaction with cells and organisms	GO:0030424 (other, cell projection) GO:0005903 (other, cluster of actin-based cell projections) GO:0005737 (cytoplasm, intracellular) GO:0030425 (other, cell projection) GO:0016021 (other, membrane part) GO:0016020 (other) GO:0044306 (other, cell projection) GO:0005886 (plasma membrane, cell periphery) GO:0045202 (other) GO:0008021 (other intracellular organelles, endomembrane system)	GO:0008238 (catalytic activity, hydrolase activity) GO:0004222 (catalytic activity, hydrolase activity) GO:0042277 (binding, amide binding) GO:0008270 (binding, ion binding)
336	F6S2X3	1	AHNAK	Uncharacterized protein OS=Macaca mulatta GN=AHNAK PE=4 SV=1;Uncharacterized protein (Fragment) OS=Macaca mulatta GN=EGK_06115 PE=4 SV=1	4.57143	3.14286	5.28571	ISMPDFDLNLK+ISMPDIDLNLK+ISMPDVDFNLK+ISMPDVDLNLK+VDIDVPDVNIEGPDAK+VDIDVPDVNIEGPEGK+VDIEGPDVNIEGPEGK	5597			GO:0051259 cellular component organization or biogenesisGO:0043484 regulationGO:1901385 regulation	GO:0015629 (cytoskeleton, intracellular) GO:0044291 (other, cell-cell junction) GO:0043034 (other intracellular organelles, intracellular) GO:0005829 (cytoplasm, intracellular) GO:0070062 (extracellular, extracellular exosome) GO:0045121 (other, membrane part) GO:0005634 (nucleus, intracellular) GO:0042383 (plasma membrane, cell periphery)	GO:0044548 (binding, protein binding) GO:0097493 (structural molecule activity, structural molecule activity conferring elasticity)
337	P55068	0.6855	Bcan	Brevican core protein OS=Rattus norvegicus GN=Bcan PE=1 SV=2;Brevican core protein OS=Mus musculus GN=Bcan PE=1 SV=2;Brevican core protein OS=Rattus norvegicus GN=Bcan PE=1 SV=1;Putative uncharacterized protein (Fragment) OS=Mus musculus GN=Bcan PE=2 SV=1	3.66667	6.33333	5.33333	YAVDTVLR		May play a role in the terminally differentiating and the adult nervous system during postnatal development. Could stabilize interactions between hyaluronan (HA) and brain proteoglycans. Isoform 2 may function as a chondroitin sulfate-bearing cell surface receptor.		GO:0007155 interaction with cells and organismsGO:0007417 developmental processGO:0048168 regulationGO:0001501 developmental process	GO:0031225 (other, membrane part) GO:0030425 (other, cell projection) GO:0005615 (extracellular, extracellular region part) GO:0045202 (other)	GO:0030246 (binding, carbohydrate binding) GO:0005201 (structural molecule activity, extracellular matrix structural constituent) GO:0005540 (binding, carbohydrate derivative binding)
338	A2ACT7	1	Col9a3	Collagen, type IX, alpha 3 OS=Mus musculus GN=Col9a3 PE=1 SV=1;Uncharacterized protein OS=Mus musculus GN=Col9a3 PE=2 SV=1	24.5	1.5	23	DGPAGPKGAPGERGSLGPPGPPGLGGK+DGRDGAHGEPGLPGDPGLPGAAGAQGTPGICDTSACQGAVLGGGGEKSGPR+GAPGERGSLGPPGPPGLGGKGLPGPPGEAGVSGLPGGIGLR+GATGAGLDGPAGDQGYQGPQGVPGISK+GDLGRPGPKGIPGMAGPGGEPGMPGK+GDLGRPGPKGIPGMAGPGGEPGMPGKDGK+GDVGDRGPGGATGPKGDQGIAGSDGLPGDK+GIQGPNGTSGVQGVPGPPGPLGLQGVQGVPGITGKPGVPGKEASEQRIR+GPKGDLGRPGPKGIPGMAGPGGEPGMPGK+KPLAPGSIGRPGPAGPPGPPGPPGSIGHPGAR+KPLAPGSIGRPGPAGPPGPPGPPGSIGHPGARGPPGYR+MTGAPALAL…	680			GO:0008585 developmental processGO:0008584 developmental process	GO:0005594 (macromolecular complex, protein complex)
339	P60843	1	Eif4a1	Eukaryotic initiation factor 4A-I OS=Mus musculus GN=Eif4a1 PE=1 SV=1;Putative uncharacterized protein OS=Mus musculus GN=Eif4a1 PE=2 SV=1;Putative uncharacterized protein OS=Mus musculus GN=Eif4a1 PE=2 SV=1;Putative uncharacterized protein OS=Mus musculus GN=Eif4a1 PE=2 SV=1;Eif4a1 protein (Fragment) OS=Mus musculus GN=Eif4a1 PE=2 SV=1;Putative uncharacterized protein OS=Mus musculus GN=Eif4a1 P…	0.59375	0.28125	1.28125	DIETFYNTSIEEMPLNVADL+DIETFYNTSIEEMPLNVADLI+GIYAYGFEKPSAIQQR+GYDVIAQAQSGTGK+LNSNTQVVLLSATMPSDVLEVTK+VLITTDLLAR+VVMALGDYMGASCHACIGGTNVR		ATP-dependent RNA helicase which is a subunit of the eIF4F complex involved in cap recognition and is required for mRNA binding to ribosome. In the current model of translation initiation, eIF4A unwinds RNA secondary structures in the 5'-UTR of mRNAs which is necessary to allow efficient binding of the small ribosomal subunit, and subsequent scanning for the initiator codon.	ATP + H(2)O = ADP + phosphate.	GO:0010468 regulationGO:0010501 cellular processGO:0006413 cellular process	GO:0005737 (cytoplasm, intracellular) GO:0005730 (nucleus, intracellular)	GO:0005524 (binding, carbohydrate derivative binding) GO:0004004 (catalytic activity, hydrolase activity) GO:0003725 (binding, heterocyclic compound binding) GO:0003743 (binding, heterocyclic compound binding)
340	Q8CCS6	0.9998	Pabpn1	Polyadenylate-binding protein 2 OS=Mus musculus GN=Pabpn1 PE=1 SV=3	0.9	6.7	1.3	AAAAAAAAAAGAAGGR+AAAAAAAAAAGAAGGRGSGPGR+AAAAAAAAAAGAAGGRGSGPGRR+AAAAAAAAAGAAGGRGSGPGR+MAAAAAAAAAAGAAGGRGSGPGR+MAAAAAAAAAAGAAGGRGSGPGRR+QMNMSPPPGNAGPVIMSLEEKMEADAR+TSLALDESLFR		Involved in the 3'-end formation of mRNA precursors (pre-mRNA) by the addition of a poly(A) tail of 200-250 nt to the upstream cleavage product. Stimulates poly(A) polymerase (PAPOLA) conferring processivity on the poly(A) tail elongation reaction and controls also the poly(A) tail length. Increases the affinity of poly(A) polymerase for RNA. Is also present at various stages of mRNA metabolism i…		GO:0071222 cellular processGO:0000165 regulationGO:0006378 cellular processGO:0016973 localizationGO:1904247 regulation	GO:0005737 (cytoplasm, intracellular) GO:0042405 (nucleus, intracellular) GO:0016607 (nucleus, intracellular) GO:0005634 (nucleus, intracellular) GO:1990904 (nucleus, ribonucleoprotein complex)	GO:0008143 (binding, heterocyclic compound binding) GO:0043621 (binding, protein binding) GO:0070063 (binding, protein binding)
341	F1MAA7	1	Lamc1	Laminin subunit gamma 1 OS=Rattus norvegicus GN=Lamc1 PE=1 SV=1;Laminin subunit gamma-1 OS=Mus musculus GN=Lamc1 PE=1 SV=1;Putative uncharacterized protein OS=Mus musculus GN=Lamc1 PE=2 SV=1	3	1.53333	1.06667	LNTFGDEVFNDPK+LSAEDLVLEGAGLR+PSAYNFDNSPVLQEWVTATDIR+SQECYFDPELYR+TGGDEQQALCTDEFSDISPLTGGNVAFSTLEGR+VSVPLIAQGNSYPSETTVK	1607			GO:0016477 cellular processGO:0022617 cellular component organization or biogenesisGO:0031581 cellular component organization or biogenesisGO:0065003 cellular component organization or biogenesisGO:0034446 interaction with cells and organisms	GO:0031012 (extracellular, extracellular matrix) GO:0005606 (extracellular, extracellular matrix)	GO:0005201 (structural molecule activity, extracellular matrix structural constituent)
342	F6XAP8	1	HSPA4	Uncharacterized protein OS=Macaca mulatta GN=HSPA4 PE=3 SV=1;Heat shock 70 kDa protein 4 OS=Macaca mulatta GN=HSPA4 PE=2 SV=1;Putative uncharacterized protein OS=Macaca fascicularis GN=EGM_15378 PE=3 SV=1	0.4	2	0.64	AFSDPFVEAEK+AGGIETIANEYSDR+EFSITDVVPYPISLR+GCALQCAILSPAFK+NFTTEQVTAMLLSK+SDLPLSIECFMNDVDVSGTMNR+SNLAYDIVQLPTGLTGIK	747					GO:0005524 (binding, carbohydrate derivative binding)
343	A0A1U7QY73	1	Vcl	vinculin isoform X2 OS=Mesocricetus auratus GN=Vcl PE=4 SV=1;vinculin isoform X1 OS=Mesocricetus auratus GN=Vcl PE=4 SV=1;Vinculin OS=Cricetulus griseus GN=I79_002180 PE=4 SV=1	1.6875	1.1875	2.375	AIPDLTAPVAAVQAAVSNLVR+ALASQLQDSLK+AQQVSQGLDVLTAK+MLGQMTDQVADLR+MTGLVDEAIDTK+TNISDEESEQATEMLVHNAQNLMQSVK+VAMANIQPQMLVAGATSIAR+VLQLTSWDEDAWASK
344	P21533	1	Rpl6	60S ribosomal protein L6 OS=Rattus norvegicus GN=Rpl6 PE=1 SV=5;60S ribosomal protein L6 OS=Mus musculus GN=Rpl6 PE=1 SV=3;Uncharacterized protein OS=Rattus norvegicus PE=4 SV=1;60S ribosomal protein L6 OS=Rattus norvegicus GN=Rpl6-ps1 PE=3 SV=1;60S ribosomal protein L6 OS=Mus musculus GN=Rpl6 PE=1 SV=1;60S ribosomal protein L6 OS=Mus musculus GN=Rpl6 PE=2 SV=1;60S ribosomal protein L6 (Fragment)…	12.3333	1.83333	0.666667	AVPQLQGYLR+VLATVTK+YEITEQR+YYPTEDVPRK	298	Component of the large ribosomal subunit.		GO:0002181 cellular processGO:0000027 cellular component organization or biogenesis	GO:0031672 (other intracellular organelles, intracellular) GO:0022625 (ribosome, intracellular) GO:0042788 (ribosome, intracellular) GO:0005791 (er, endomembrane system)	GO:1990932 (binding, heterocyclic compound binding) GO:0003729 (binding, heterocyclic compound binding) GO:0003735 (structural molecule activity, structural constituent of ribosome) GO:0000049 (binding, heterocyclic compound binding)
345	G7NCE2	1	EGK_06974	Uncharacterized protein OS=Macaca mulatta GN=EGK_06974 PE=3 SV=1;Putative uncharacterized protein OS=Macaca fascicularis GN=EGM_06298 PE=3 SV=1;Hypoxia up-regulated protein 1 OS=Macaca mulatta GN=HYOU1 PE=2 SV=1;Hypoxia up-regulated protein 1 OS=Macaca mulatta GN=HYOU1 PE=2 SV=1;Hypoxia up-regulated protein 1 OS=Macaca mulatta GN=HYOU1 PE=2 SV=1	3.1875	1.625	0.4375	AANSLEAFIFETQDK+EAGMQPQLQIR+EELGKNINADEAAAMGAVYQAAALSK+LAVMSVDLGSESMK+NINADEAAAMGAVYQAAALSK+RAVLQAAR+TVLSANADHMAQIEGLMDDVDFK+VLQLINDNTATALSYGVFR	999					GO:0005524 (binding, carbohydrate derivative binding)
346	A0A1U7QAY3	1	Ckb	creatine kinase B-type OS=Mesocricetus auratus GN=Ckb PE=3 SV=1	5	1.8	2.2	DLFDPIIEDR+TDLNPDNLQGGDDLDPNYVLSSR+VLTPELYAELR	381				GO:0005829 (cytoplasm, intracellular) GO:0043209 (other, myelin sheath)	GO:0005524 (binding, carbohydrate derivative binding) GO:0016301 (catalytic activity, transferase activity) GO:0031625 (binding, protein binding)
347	A0A061HXH9	1	H671_7g18578	Importin subunit beta-1 OS=Cricetulus griseus GN=H671_7g18578 PE=4 SV=1	1.16667	1.05556	2.05556	DYFNVPYPLPK+ESCLEAYTGIVQGLK+HFIMQVVCEATQCPDTR+LAATNALLNSLEFTK+LGLQNDLFSLAR+LLETTDRPDGHQNNLR+LQQVLQMESHIQSTSDR+SPVYLTVLK+SSAYESLMEIVK+TTLVIMER+VALSNMNVIDR+VTLSFPSTLQTGTGTLK+YAAVTQFEATDAR	1580			GO:0006886 localization	GO:0005622 (other, intracellular)	GO:0008237 (catalytic activity, hydrolase activity) GO:0008536 (binding, protein binding) GO:0008270 (binding, ion binding)
348	F6WVB2	1	LAMC1	Uncharacterized protein OS=Macaca mulatta GN=LAMC1 PE=4 SV=1;Uncharacterized protein (Fragment) OS=Macaca mulatta GN=EGK_01867 PE=4 SV=1;Putative uncharacterized protein (Fragment) OS=Macaca fascicularis GN=EGM_01602 PE=4 SV=1;Laminin subunit gamma-1 OS=Macaca mulatta GN=LAMC1 PE=2 SV=1	3	1.53333	1.06667	LNTFGDEVFNDPK+LSAEDLVLEGAGLR+PSAYNFDNSPVLQEWVTATDIR+SQECYFDPELYR+TGGDEQQALCTDEFSDISPLTGGNVAFSTLEGR+VSVPLIAQGNSYPSETTVK	1314			GO:0016477 cellular processGO:0022617 cellular component organization or biogenesisGO:0031581 cellular component organization or biogenesisGO:0065003 cellular component organization or biogenesisGO:0034446 interaction with cells and organisms	GO:0005604 (extracellular, extracellular matrix)	GO:0005201 (structural molecule activity, extracellular matrix structural constituent)
349	J9P969	1	AHNAK	Uncharacterized protein OS=Canis familiaris GN=AHNAK PE=4 SV=1	3.27273	1.90909	2	ELLLPNWQGSGSHGLTIAQR+ISMPDIDLNLK+ISMPDVDFNLK+ISMPDVDLNLK+VDIDVPDVNIEGPDAK+VDIEGPDVNIEGPEGK+VSMPDVELNLK+VTAYTVDVTGR	4966			GO:0051259 cellular component organization or biogenesisGO:0043484 regulationGO:1901385 regulation	GO:0015629 (cytoskeleton, intracellular) GO:0044291 (other, cell-cell junction) GO:0043034 (other intracellular organelles, intracellular) GO:0005829 (cytoplasm, intracellular) GO:0070062 (extracellular, extracellular exosome) GO:0045121 (other, membrane part) GO:0005634 (nucleus, intracellular) GO:0042383 (plasma membrane, cell periphery)	GO:0044548 (binding, protein binding) GO:0097493 (structural molecule activity, structural molecule activity conferring elasticity)
350	Q16181-2	1	Septin-7	Isoform 2 of Septin-7 OS=Homo sapiens GN=SEPT7;Septin-7 OS=Homo sapiens GN=SEPT7 PE=1 SV=2;Septin 7 variant 4 OS=Homo sapiens PE=2 SV=1;Putative uncharacterized protein DKFZp686F17268 (Fragment) OS=Homo sapiens GN=DKFZp686F17268 PE=2 SV=1;cDNA FLJ75185 OS=Homo sapiens PE=2 SV=1;cDNA FLJ52574, highly similar to Septin-7 OS=Homo sapiens PE=2 SV=1;cDNA FLJ53636, highly similar to Septin-7 OS=Homo sa…	2.08333	3.41667	1.25	FEDYLNAESR+VNIIPIIAK		Filament-forming cytoskeletal GTPase. Required for normal organization of the actin cytoskeleton. Required for normal progress through mitosis. Involved in cytokinesis. Required for normal association of CENPE with the kinetochore. Plays a role in ciliogenesis and collective cell movements. Forms a filamentous structure with SEPT12, SEPT6, SEPT2 and probably SEPT4 at the sperm annulus which is re…		GO:0007049 cellular processGO:0030154 cellular processGO:0051301 cellular processGO:0060271 cellular component organization or biogenesisGO:1902857 regulationGO:0051291 cellular component organization or biogenesisGO:0016476 regulationGO:0007283 interaction with cells and organisms	GO:0005930 (cytoskeleton, cell projection) GO:0032154 (cell surface, cell division site) GO:0000777 (chromosome, intracellular) GO:0005829 (cytoplasm, intracellular) GO:0070062 (extracellular, extracellular exosome) GO:0030496 (other, midbody) GO:0097730 (other, cell projection) GO:0005634 (nucleus, intracellular) GO:0031105 (cytoskeleton, cell periphery) GO:0097227 (other, cell projection) GO:00…	GO:0045296 (binding, protein binding) GO:0005525 (binding, carbohydrate derivative binding) GO:0042802 (binding, protein binding) GO:0005198 (structural molecule activity)
351	Q13162	1	PRDX4	Peroxiredoxin-4 OS=Homo sapiens GN=PRDX4 PE=1 SV=1;Peroxiredoxin-4 (Fragment) OS=Homo sapiens GN=PRDX4 PE=1 SV=1;Epididymis secretory sperm binding protein Li 97n OS=Homo sapiens GN=HEL-S-97n PE=2 SV=1	6.25	4.125	1.125	GLFIIDDK+IPLLSDLTHQISK+LVQAFQYTDK+QITLNDLPVGR	271	Thiol-specific peroxidase that catalyzes the reduction of hydrogen peroxide and organic hydroperoxides to water and alcohols, respectively. Plays a role in cell protection against oxidative stress by detoxifying peroxides and as sensor of hydrogen peroxide-mediated signaling events. Regulates the activation of NF-kappa-B in the cytosol by a modulation of I-kappa-B-alpha phosphorylation.	2 R'-SH + ROOH = R'-S-S-R' + H(2)O + ROH.	GO:0019471 cellular processGO:0045454 regulationGO:0030198 cellular component organization or biogenesisGO:0007252 regulationGO:0008584 developmental processGO:2000255 regulationGO:0043312 cellular processGO:0022417 cellular processGO:0072593 cellular processGO:0007283 interaction with cells and organisms	GO:0005829 (cytoplasm, intracellular) GO:0070062 (extracellular, extracellular exosome) GO:0005576 (extracellular) GO:1904813 (other intracellular organelles, endomembrane system) GO:0005634 (nucleus, intracellular) GO:0034774 (other intracellular organelles, endomembrane system) GO:0005790 (er, endomembrane system)	GO:0042803 (binding, protein binding) GO:0008379 (antioxidant activity, peroxidase activity)
352	Q925J9-4	1	Med1	Isoform 4 of Mediator of RNA polymerase II transcription subunit 1 OS=Mus musculus GN=Med1;Mediator of RNA polymerase II transcription subunit 1 OS=Mus musculus GN=Med1 PE=1 SV=2	1.6	1.13333	3	AKSPISSGSSGSHVSGTSSSSGMK+ATNAAPLDK+EGNGTGASSGSGPGSDSKPGKR+GFASQALNTLGMPMLGGDNGEPKFK+GTVMVGKPSSHSQYTSSGSVSSSGSKSHHSHSSSSSSLASASTSGK+HGVVTSGPGGEDPIDSQMGASTNSSNHPMSSK+KNLPPASSPGYGMTTGNNPMSGTTTPTNTFPGGPITTLFNMSMSIK+LASPMKPVPGTPPSSKAKSPISSGSSGSHVSGTSSSSGMK+LSGSMYASQGSSGSSQSKNSSQTGGKPGSSPITKHGLSSGSSSTK+SSSGSASSGSVSQKTPPASNSCTPSSSSFSSSGSSMSSSQNQHGSSK+VKEGNGTGASSGSGPGSDSKPGK+VSASGGSVDSSKKTSESK		Component of the Mediator complex, a coactivator involved in the regulated transcription of nearly all RNA polymerase II-dependent genes. Mediator functions as a bridge to convey information from gene-specific regulatory proteins to the basal RNA polymerase II transcription machinery. Mediator is recruited to promoters by direct interactions with regulatory proteins and serves as a scaffold for t…		GO:0006702 regulationGO:0030521 regulationGO:0001525 developmental processGO:0009887 developmental processGO:0031100 developmental processGO:0007420 developmental processGO:0043010 developmental processGO:0000902 cellular component organization or biogenesisGO:0071364 cellular processGO:0035729 cellular processGO:0071383 cellular processGO:0097067 cellular processGO:0035050 developmental processG…	GO:0000785 (chromosome, intracellular) GO:0016592 (nucleus, intracellular) GO:0005730 (nucleus, intracellular) GO:0005654 (nucleus, intracellular) GO:0005634 (nucleus, intracellular) GO:0032993 (macromolecular complex, protein-DNA complex) GO:0000151 (macromolecular complex, intracellular)	GO:0003682 (binding, chromatin binding) GO:0031490 (binding, chromatin binding) GO:0001047 (binding, heterocyclic compound binding) GO:0003677 (binding, heterocyclic compound binding) GO:0030331 (binding, protein binding) GO:0050693 (binding, protein binding) GO:0036033 (binding, macromolecular complex binding) GO:0035257 (binding, protein binding) GO:0016922 (binding, protein binding) GO:0030374…
353	F1P895	1	EIF4A1	Uncharacterized protein OS=Canis familiaris GN=EIF4A1 PE=3 SV=2;Uncharacterized protein OS=Canis familiaris GN=EIF4A1 PE=3 SV=1	0.59375	0.28125	1.28125	DIETFYNTSIEEMPLNVADL+DIETFYNTSIEEMPLNVADLI+GIYAYGFEKPSAIQQR+GYDVIAQAQSGTGK+LNSNTQVVLLSATMPSDVLEVTK+VLITTDLLAR
354	Q3TK17	0.9999	Eef2	Putative uncharacterized protein OS=Mus musculus GN=Eef2 PE=2 SV=1	0.583333	0.708333	1.875	ALLELQLEPEELYQTFQR+AYLPVNESFGFTADLR+CELLYEGPPDDEAAMGIK+CLYASVLTAQPR+DSVVAGFQWATKEGALCEENMGGVR+EGIPALDNFLDK+ETVSEESNVLCLSK+VFSGVVSTGLK+VNFTVDQIR	858					GO:0005525 (binding, carbohydrate derivative binding) GO:0003924 (catalytic activity, hydrolase activity)
[truncated: 1,318 more rows]
