# Supplementary material for: Proteomics analysis of MSN, MWCNT and ZnO nanoparticle-induced alteration in prepubertal rat ovary
Source: Royal Society of Chemistry journal article supplement (doi:10.1039/d2en00492e), 2022-01-01
Supplement: d2en00492e6.pdf [file d2en00492e6.pdf]

**Table 4: Serum TNF- $\alpha$  and IL-1 $\beta$  values of female rat exposed 14 days**

| <b>Parameters measured</b> | <b>Control</b>    | <b>MSN<br/>15mg/kg BW</b> | <b>MWCNT<br/>5mg/kg BW</b>      | <b>ZnO NPs<br/>5mg/kg BW</b> |
|----------------------------|-------------------|---------------------------|---------------------------------|------------------------------|
| TNF- $\alpha$<br>(pg/mL)   | 60.81 $\pm$ 12.41 | 193.2 $\pm$ 17.55**       | 157.2 $\pm$ 17.07**             | 238.6 $\pm$ 28.68**          |
| IL-1 $\beta$ (pg/mL)       | 33.79 $\pm$ 3.073 | 50.29 $\pm$ 2.466*        | 34.90 $\pm$ 1.307 <sup>ns</sup> | 74.40 $\pm$ 3.940**          |

Data from three animals with triplicate experiment; Figures quoted as mean $\pm$ SD and significant (ns= non significant, \*p<.05, \*\*p<0.01, \*\*\*p<0.001) compared to control
